# Supplementary material for: Genome-Wide Crossover Distribution in Arabidopsis thaliana Meiosis Reveals Sex-Specific Patterns along Chromosomes
Source: PubMed Central journal article supplement (PMC3207851; doi:10.1371/journal.pgen.1002354), 2011-11-03

**Chromosome 1 Global GC left arm**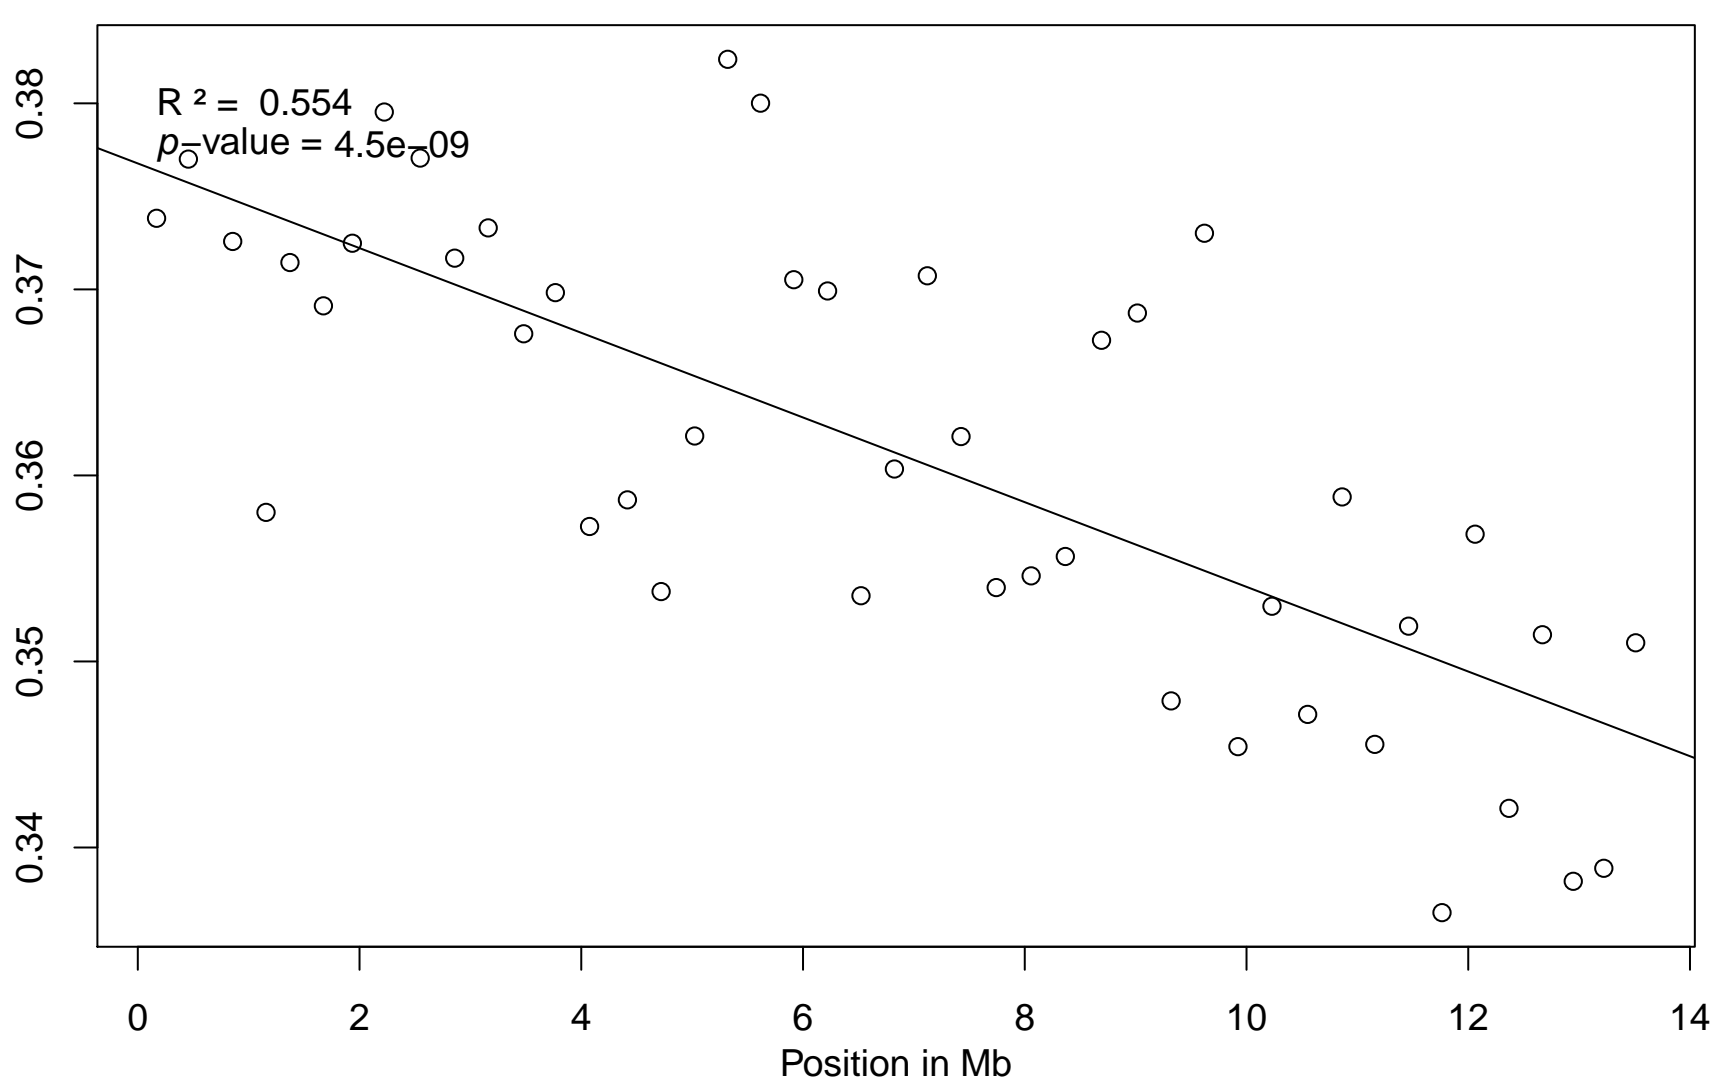**Chromosome 1 Global GC right arm**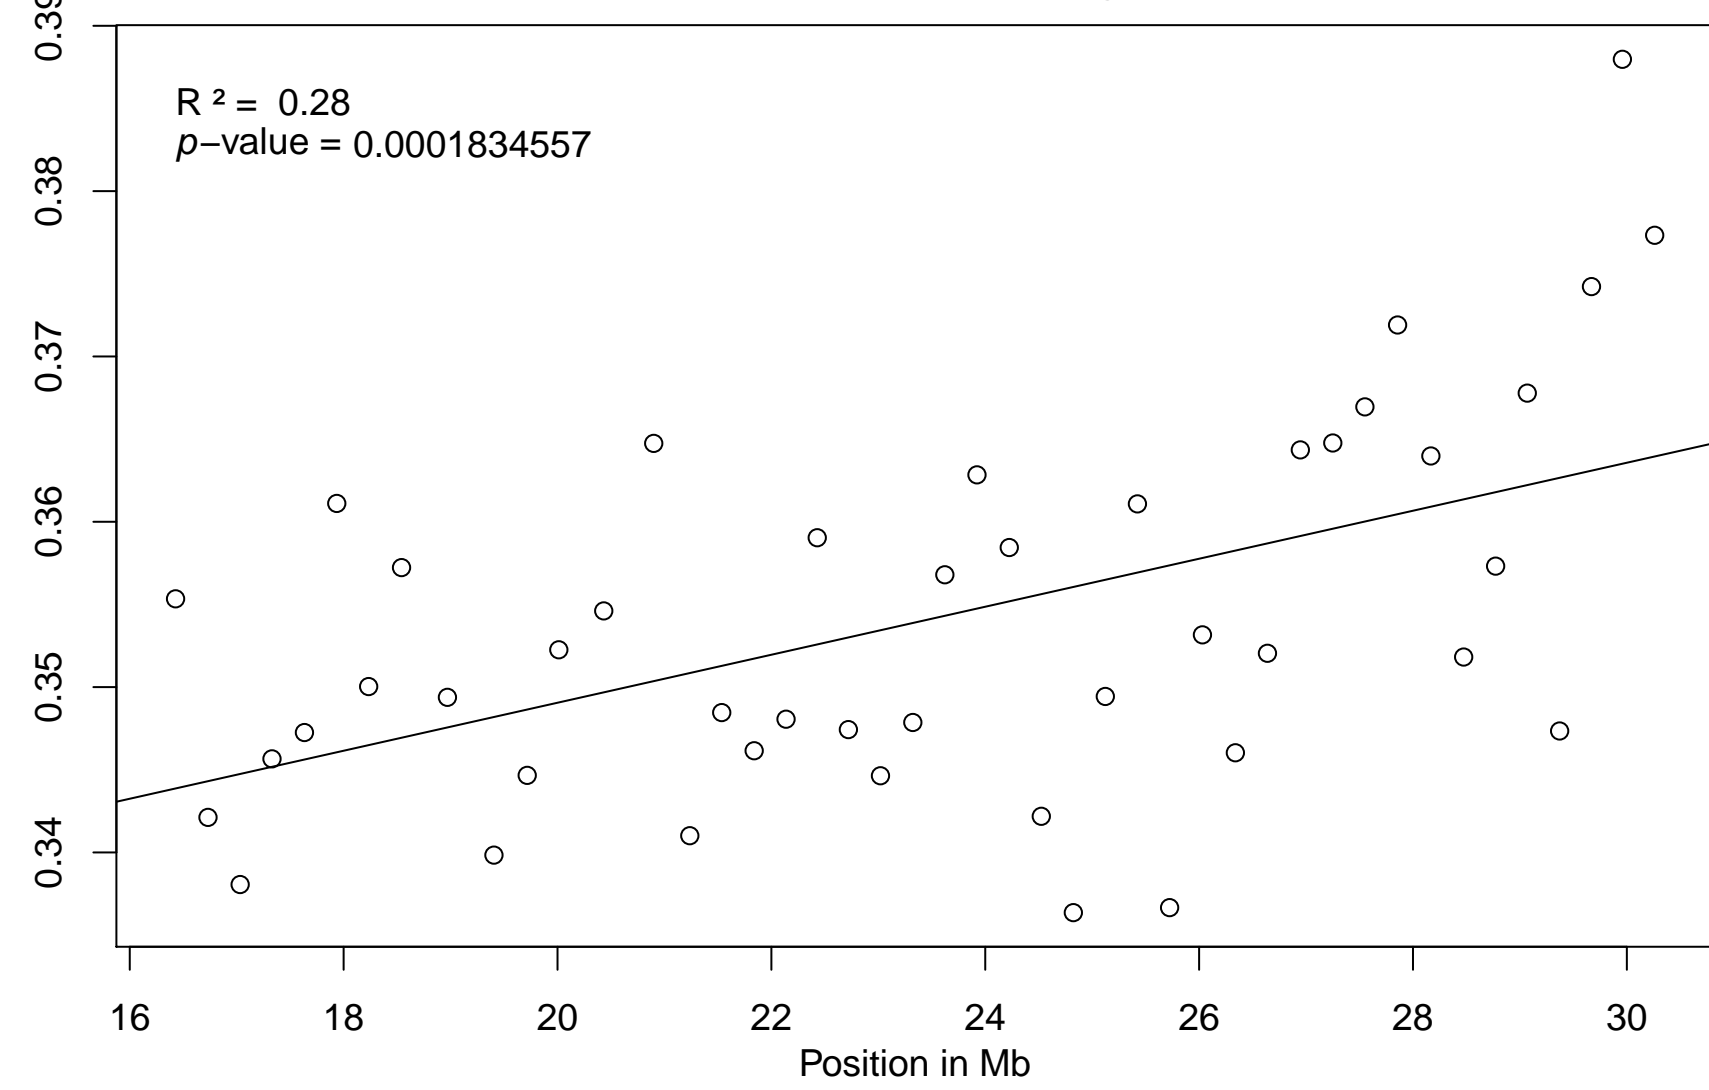**Chromosome 2 Global GC left arm**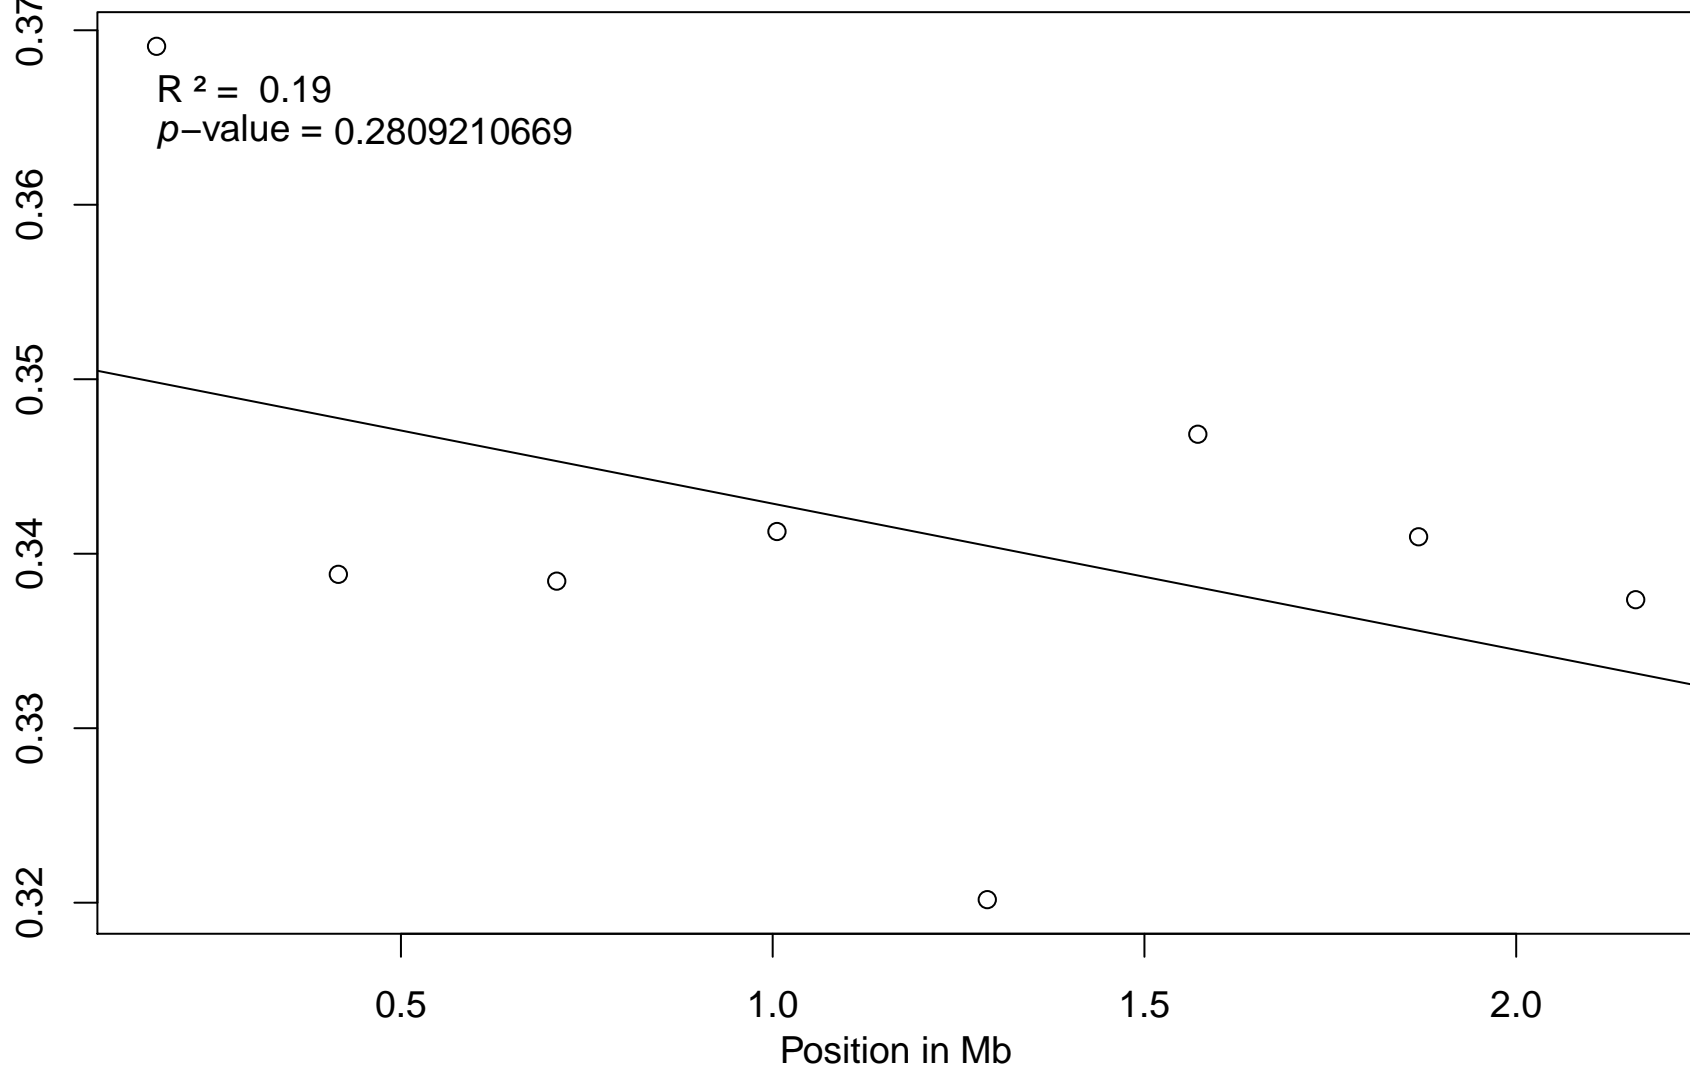**Chromosome 2 Global GC right arm**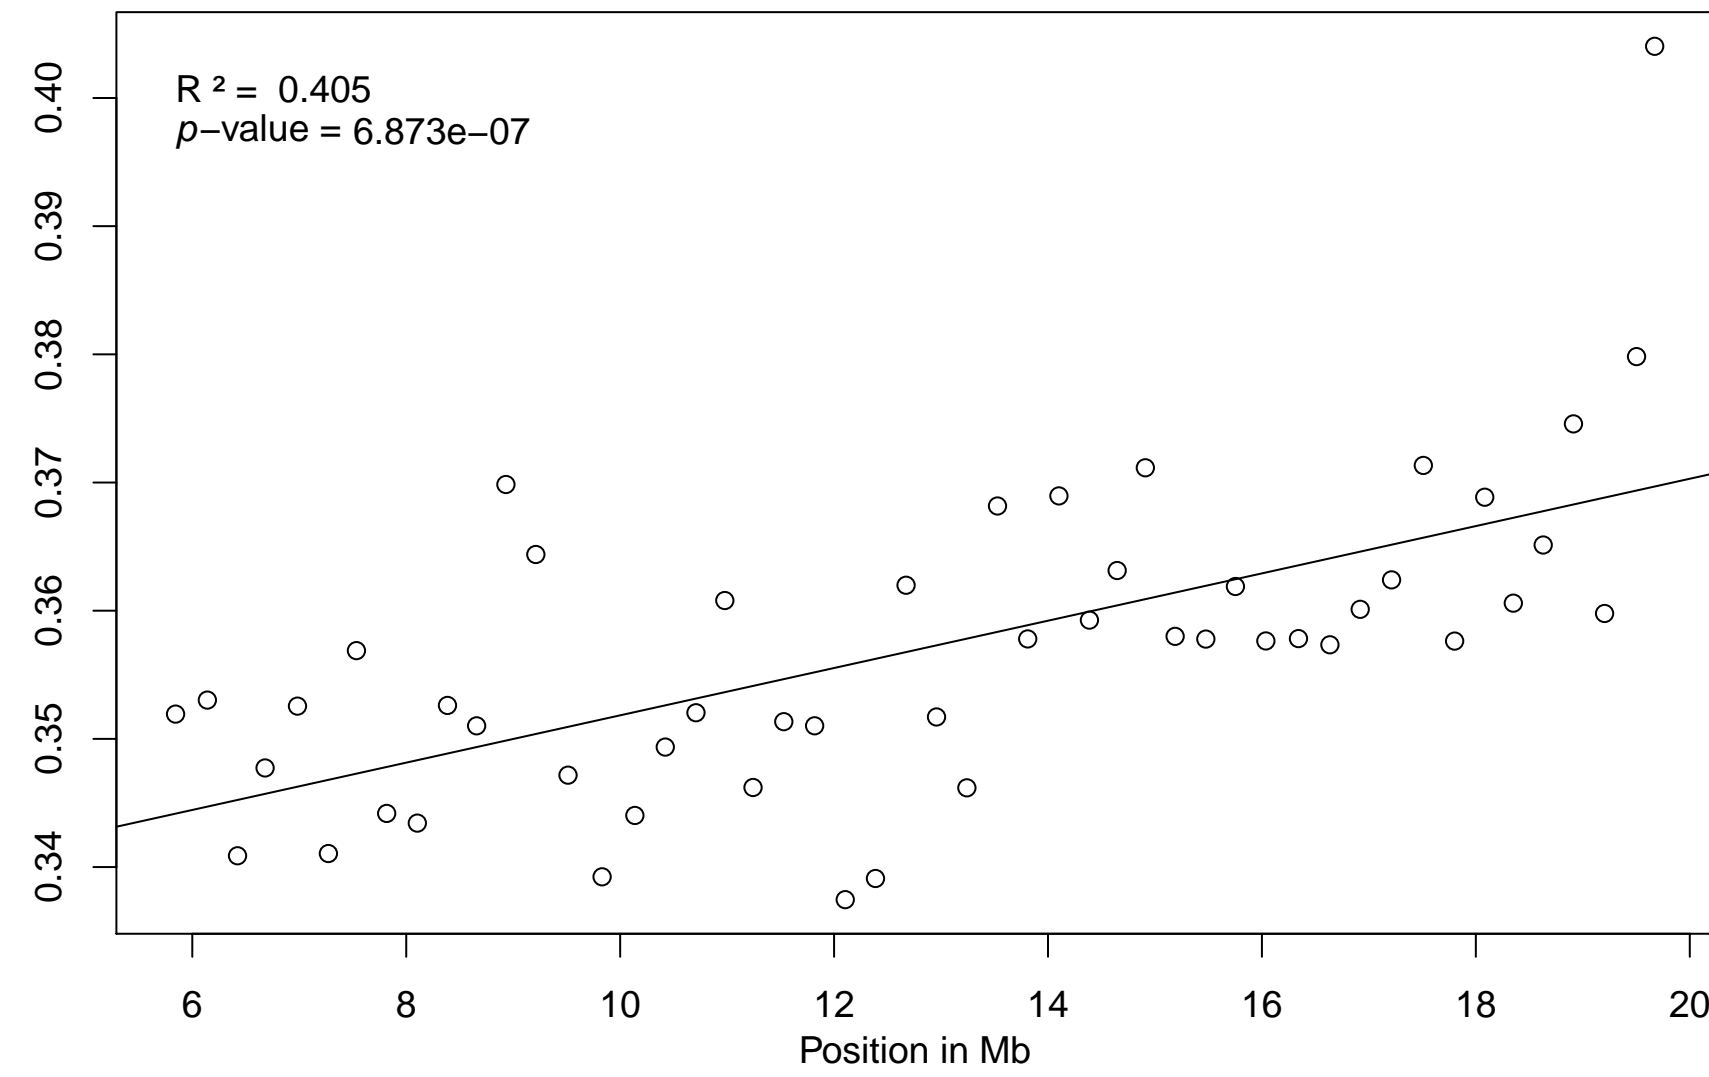**Chromosome 3 Global GC left arm**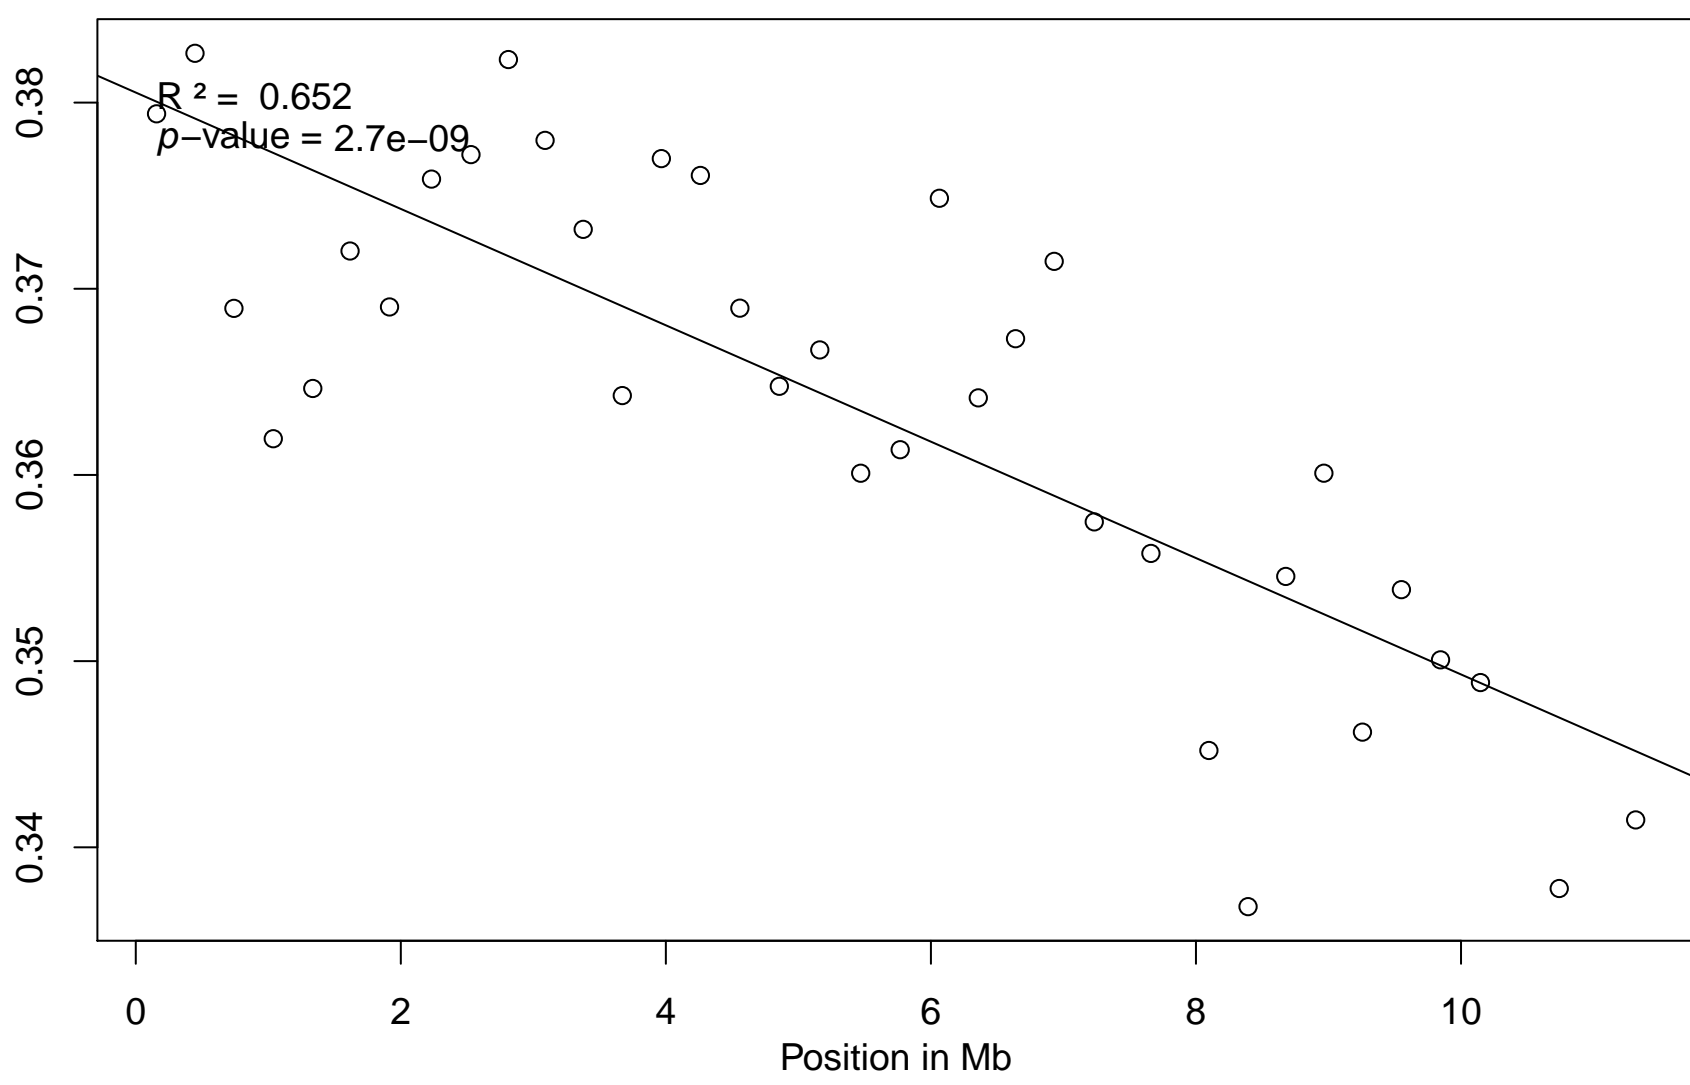**Chromosome 3 Global GC right arm**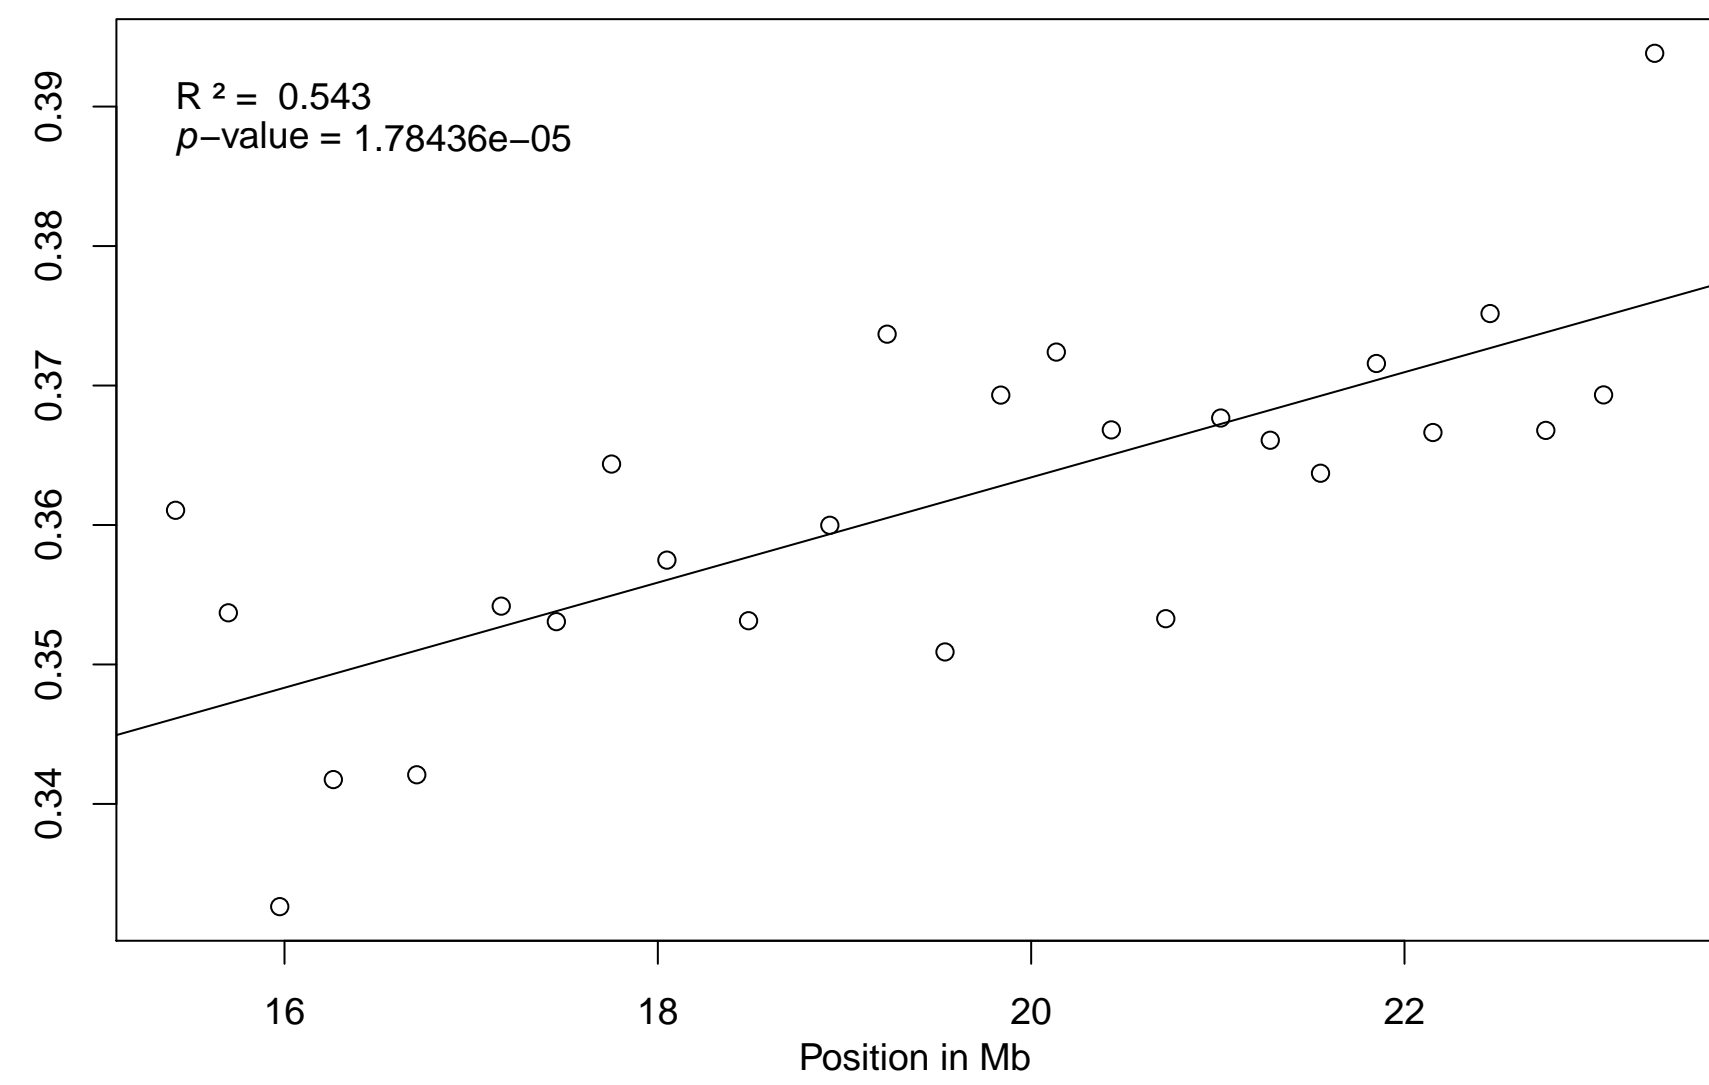**Chromosome 4 Global GC left arm**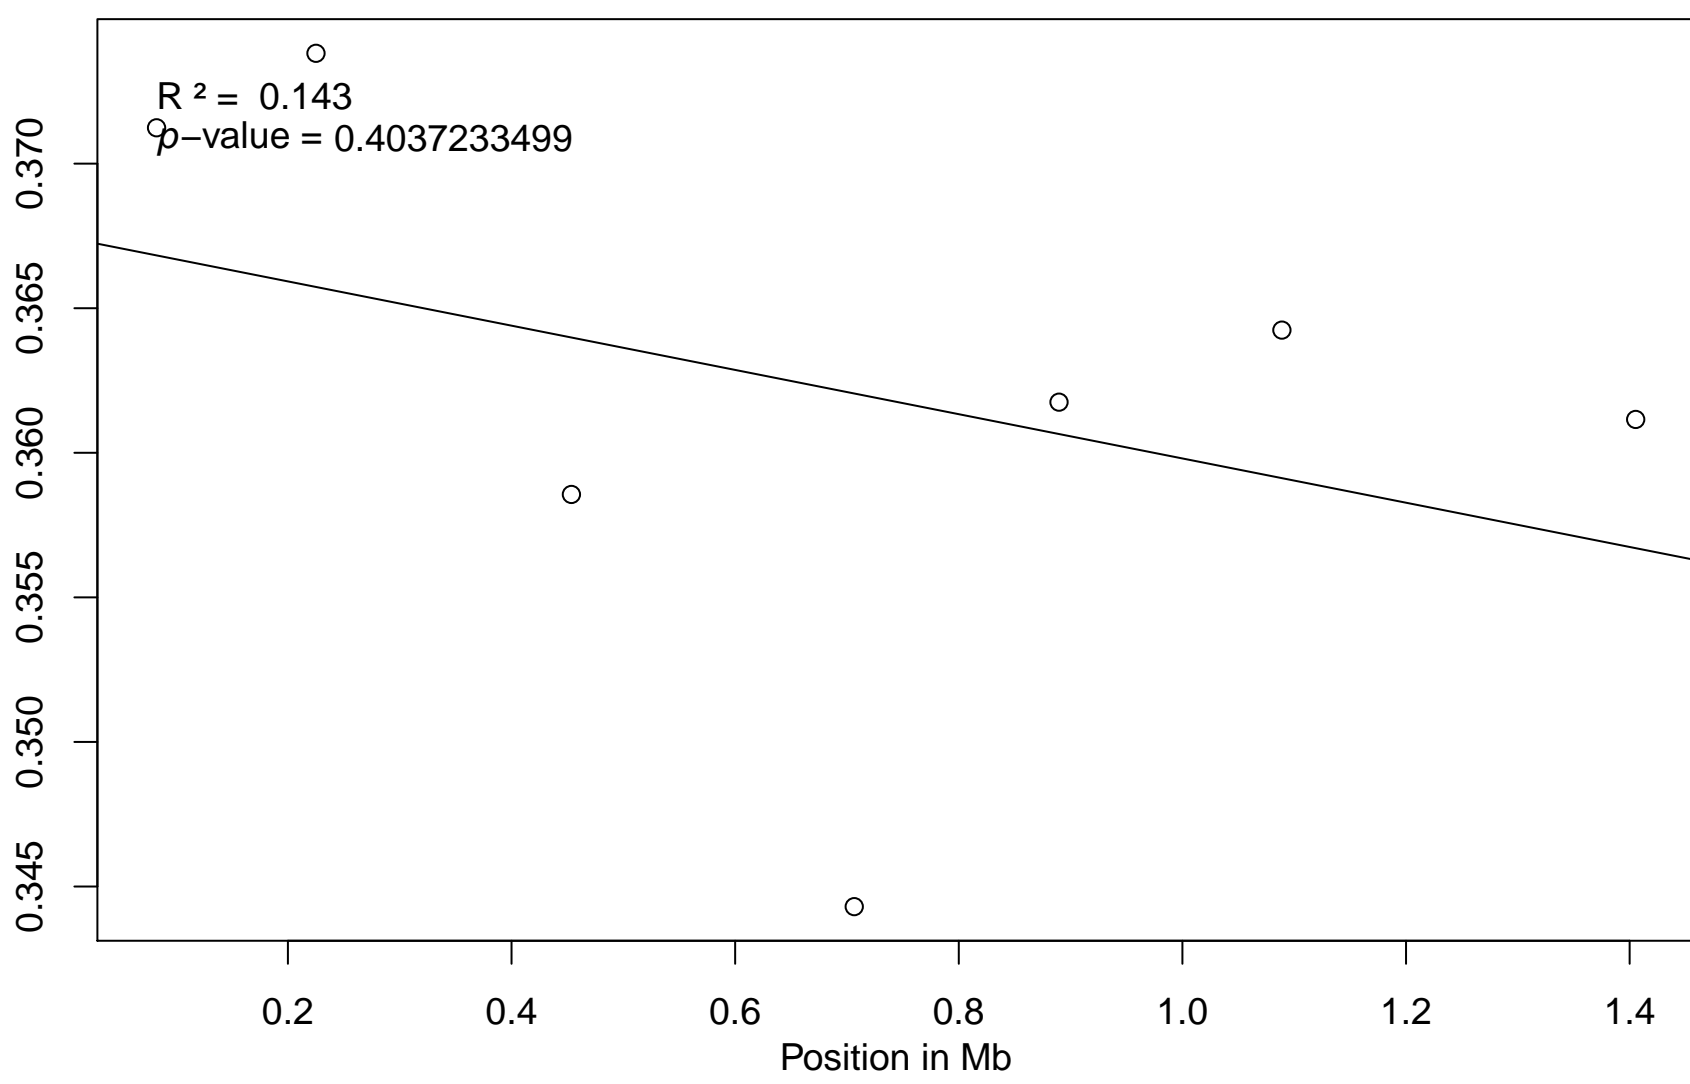**Chromosome 4 Global GC right arm**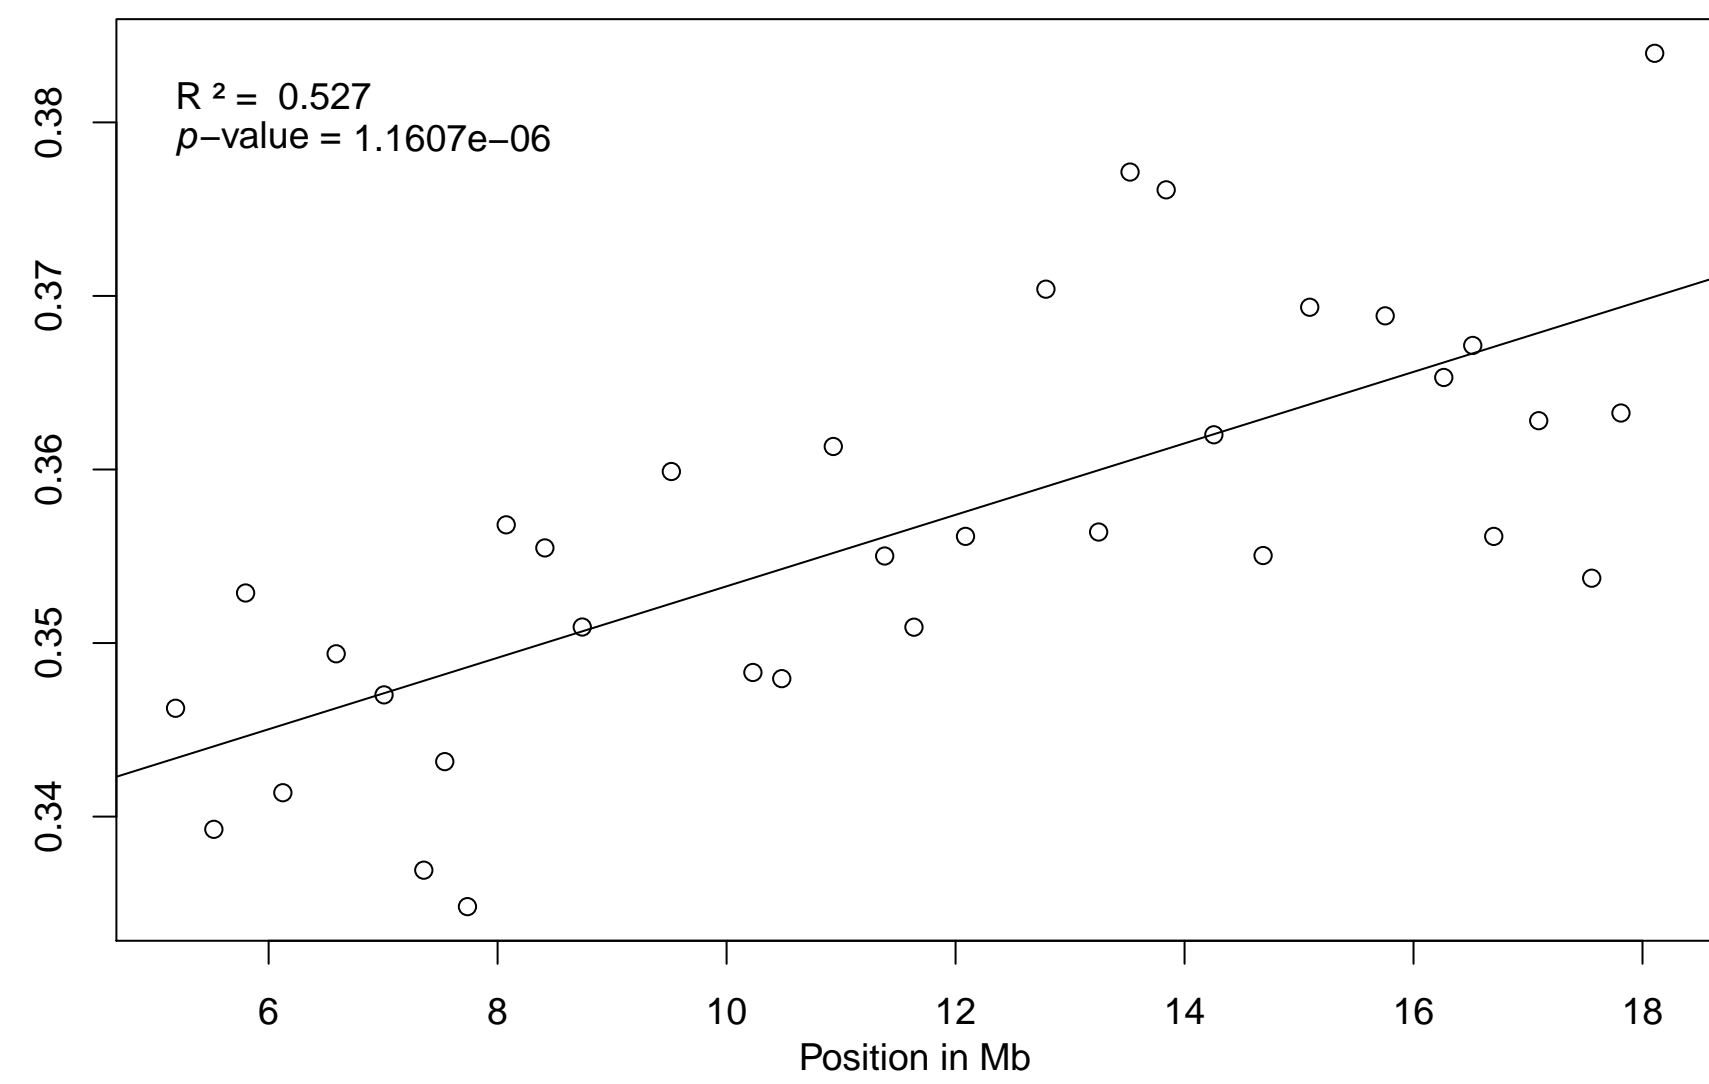**Chromosome 5 Global GC left arm**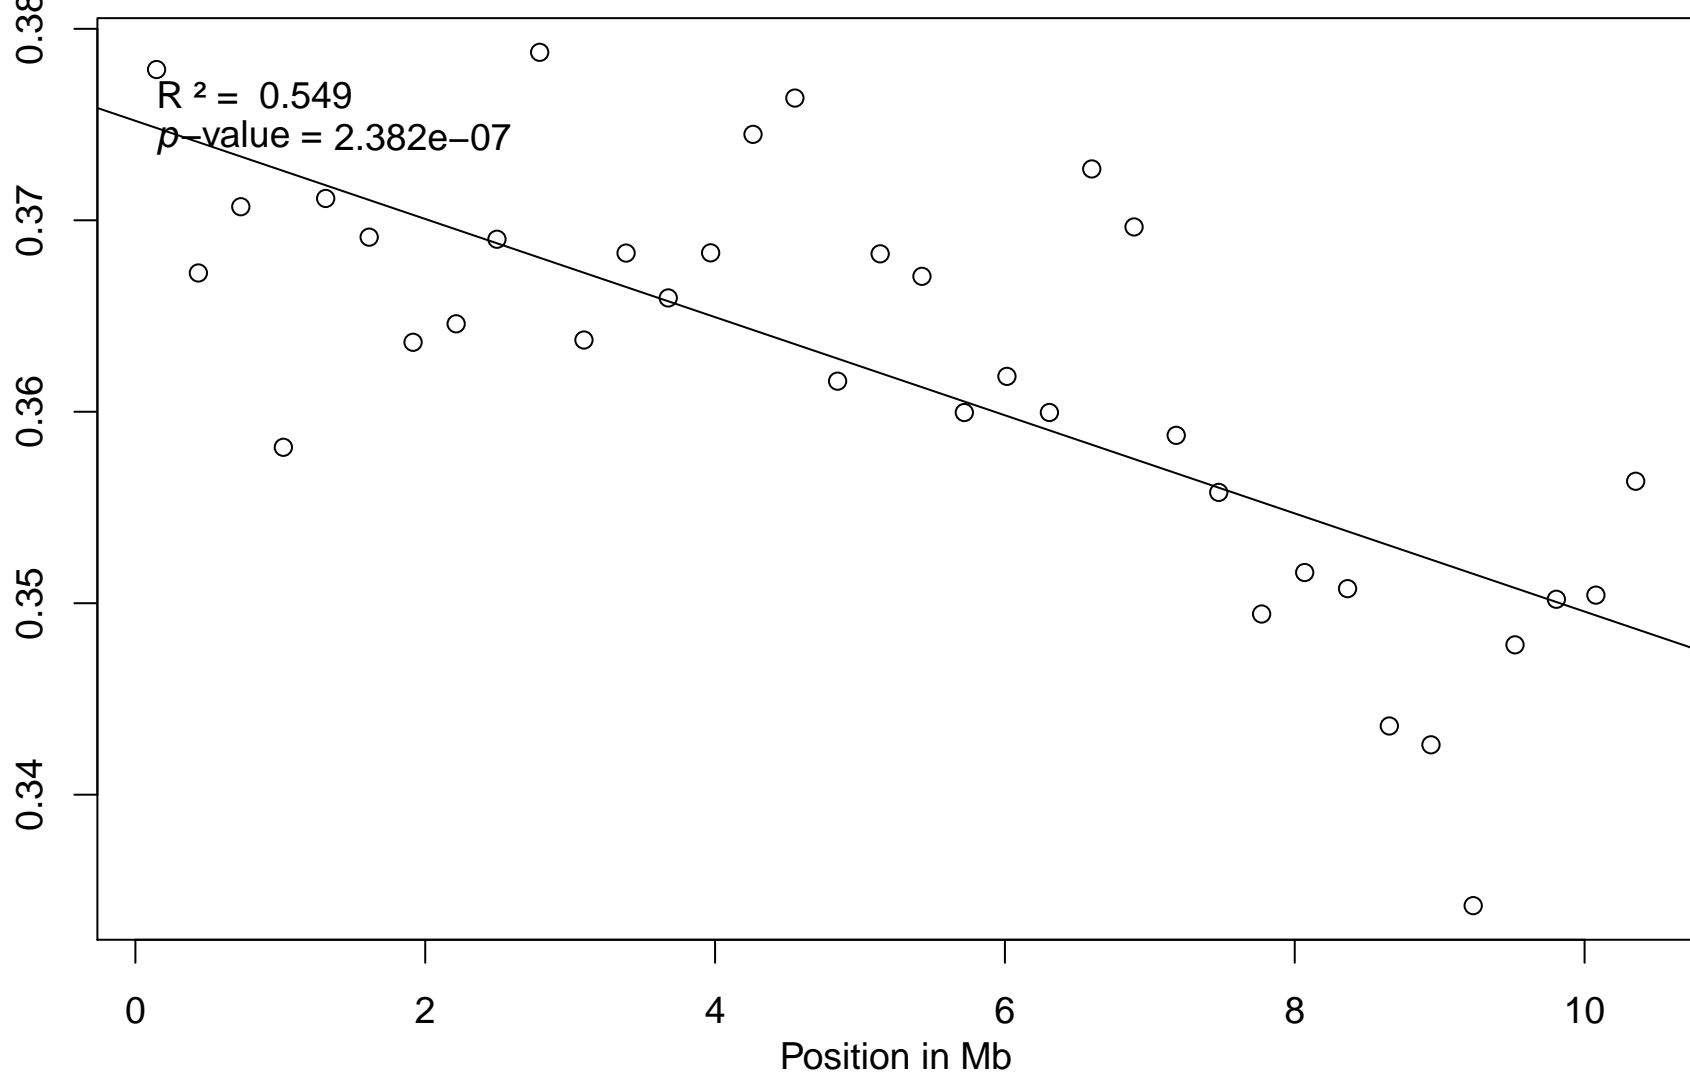**Chromosome 5 Global GC right arm**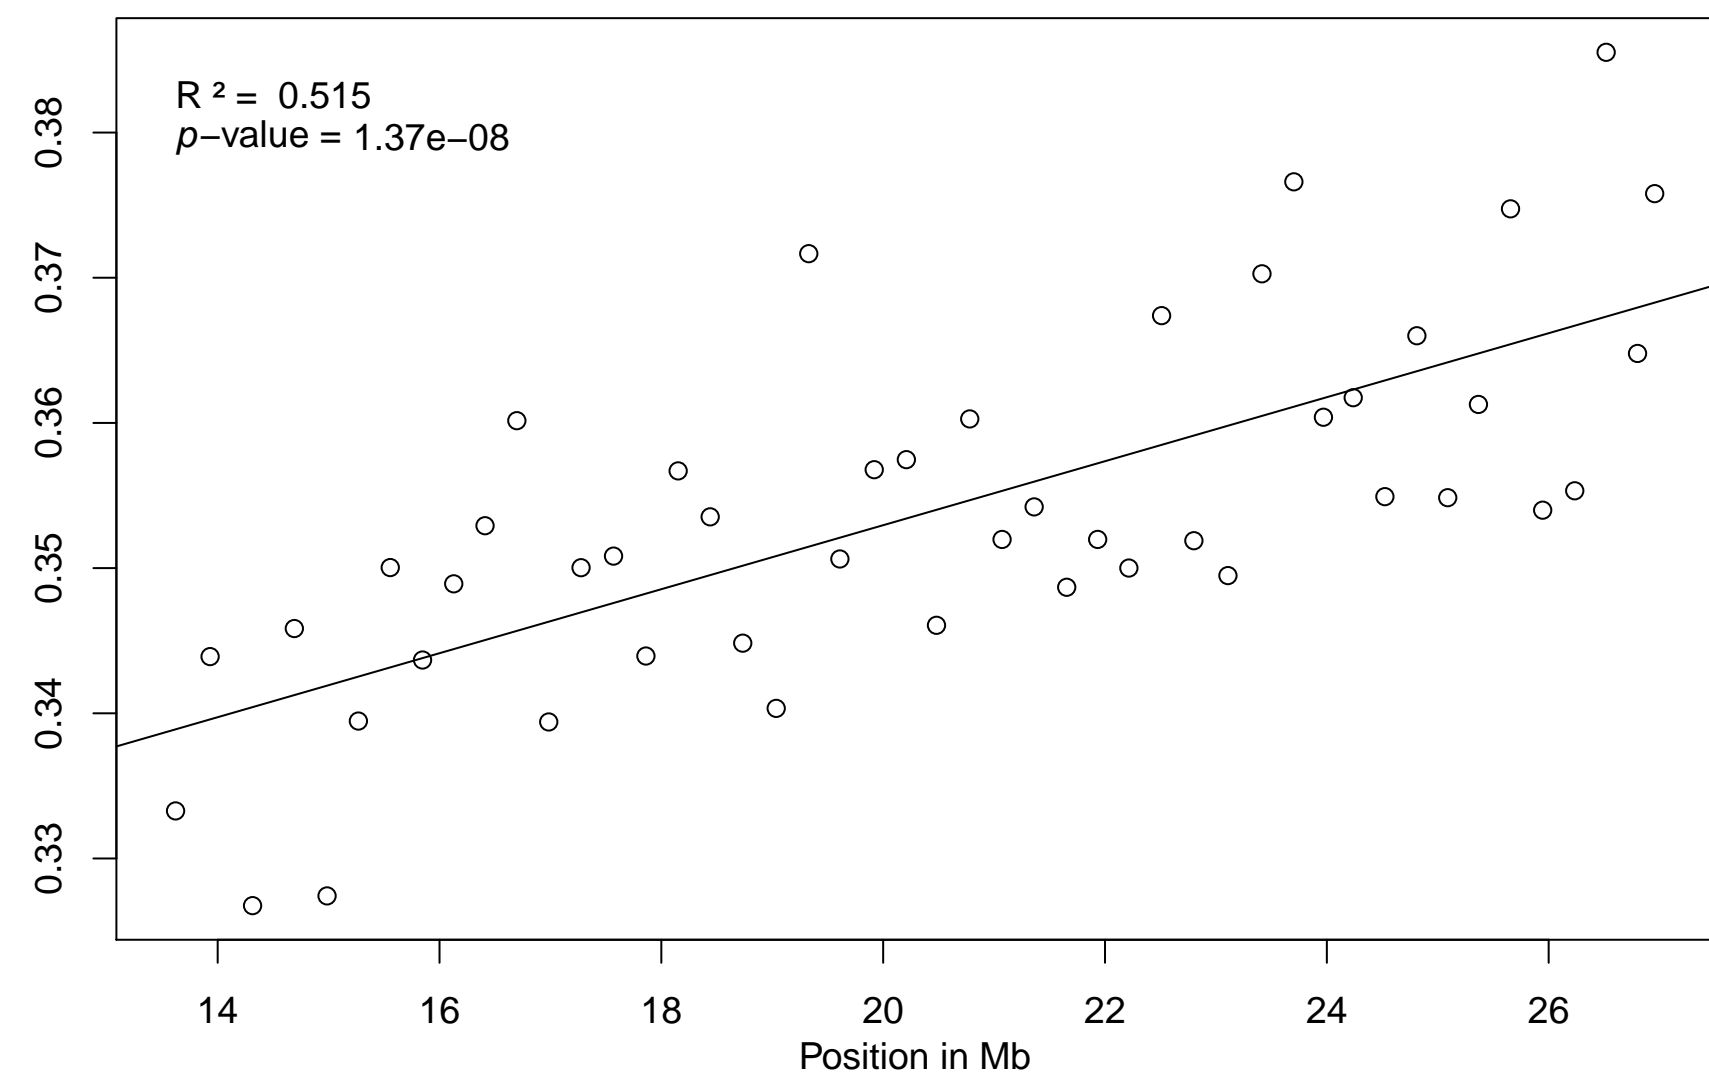

**Male Chr 1 removing 30 % of total length VALUES Global GC**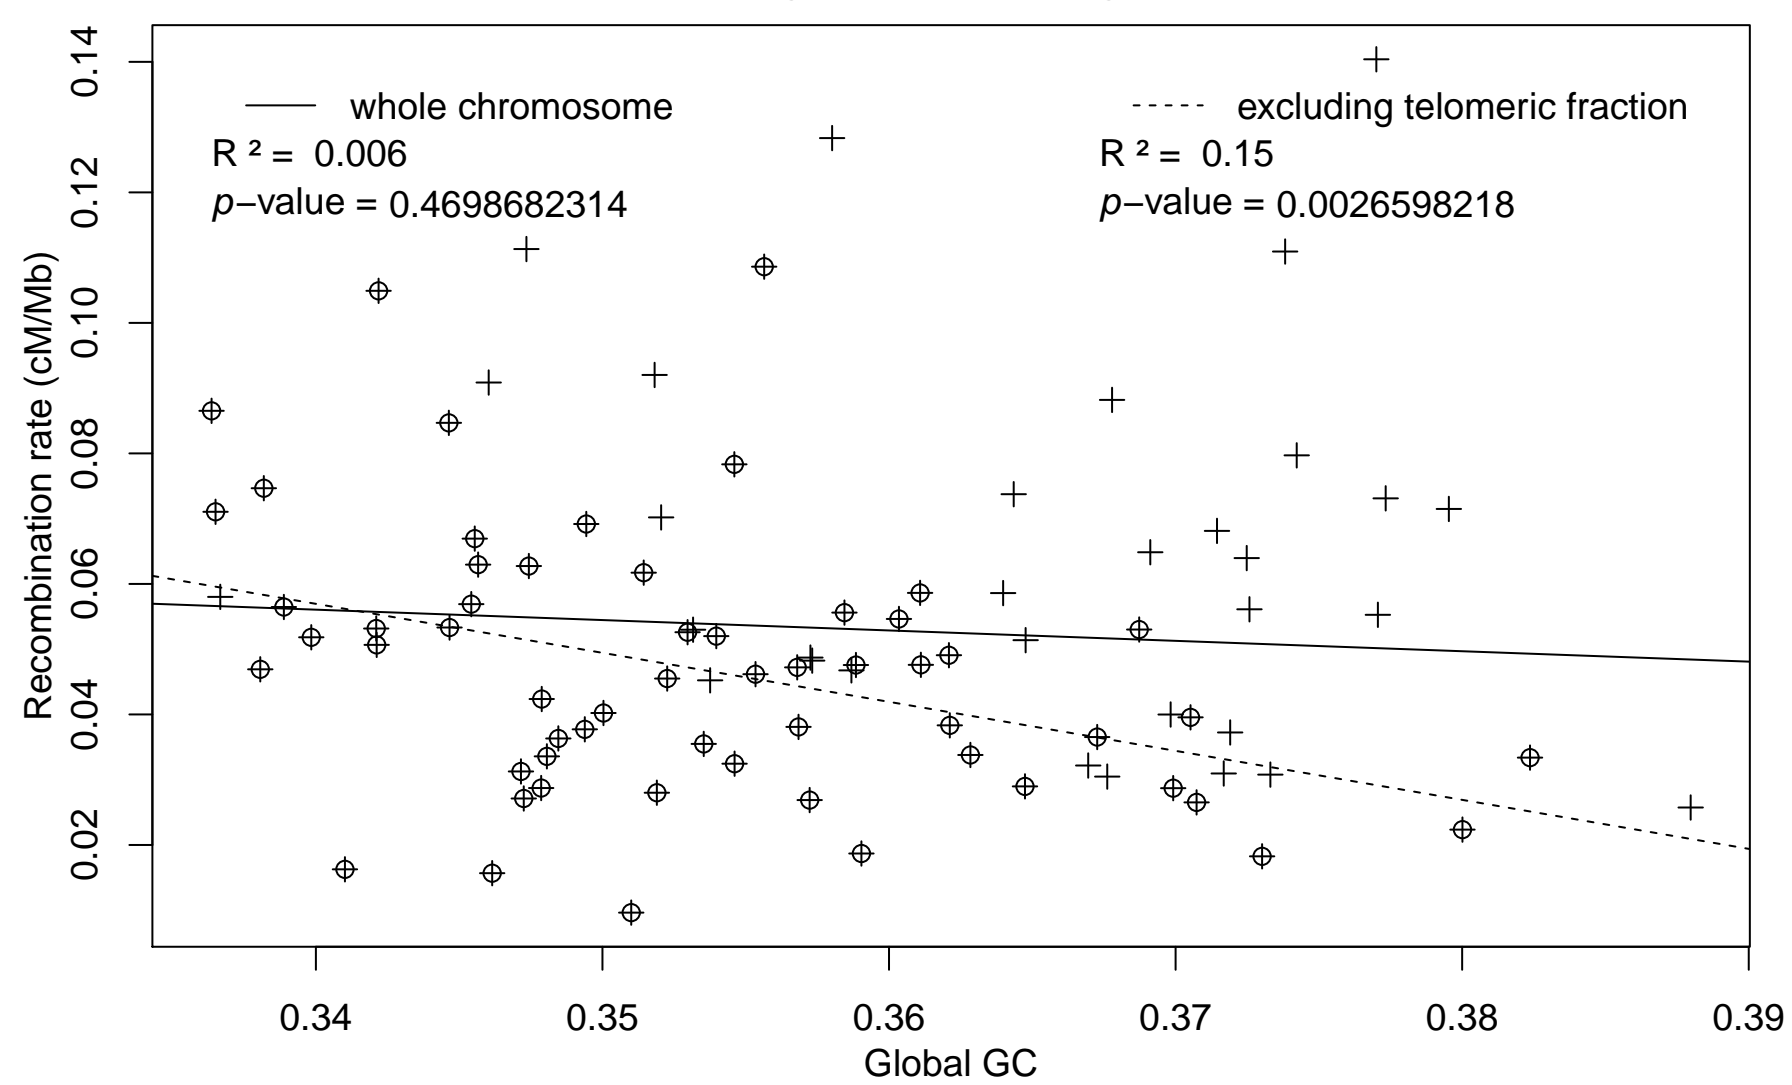**Female Chr 1 removing 30 % of total length VALUES Global GC**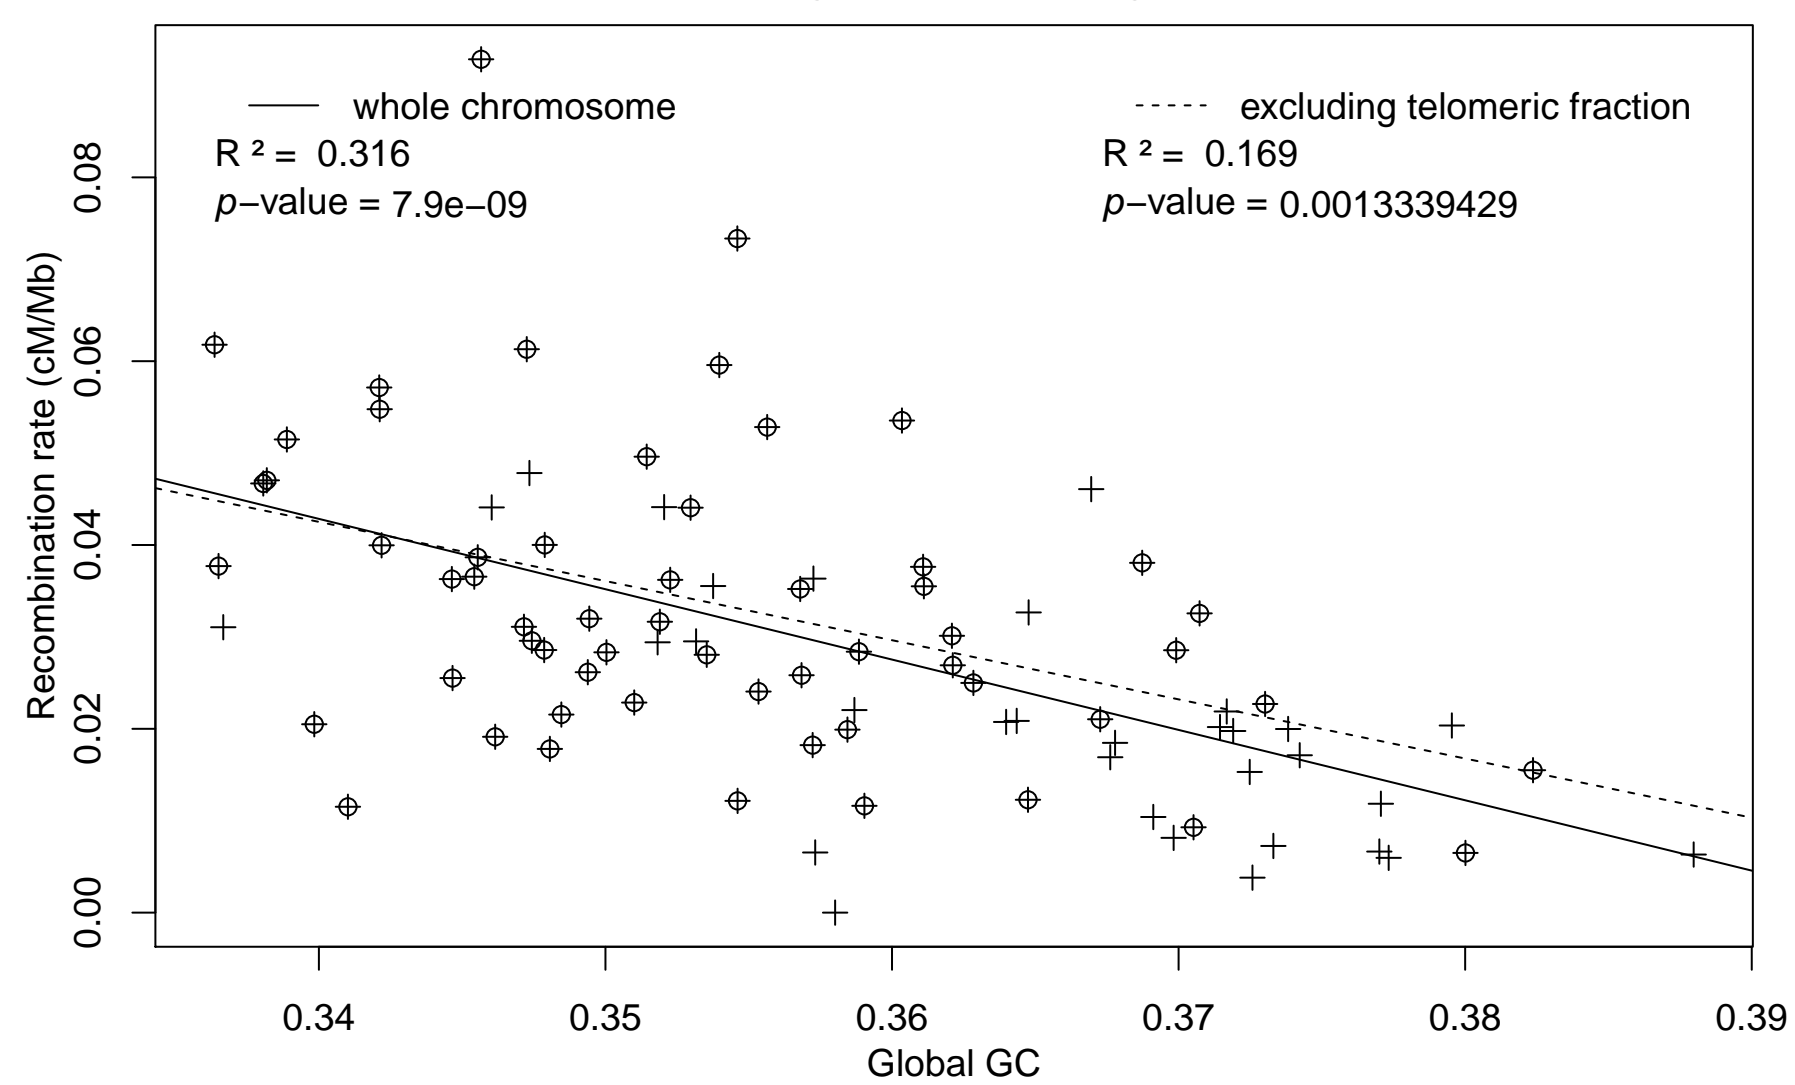**Male Chr 2 removing 30 % of total length VALUES Global GC**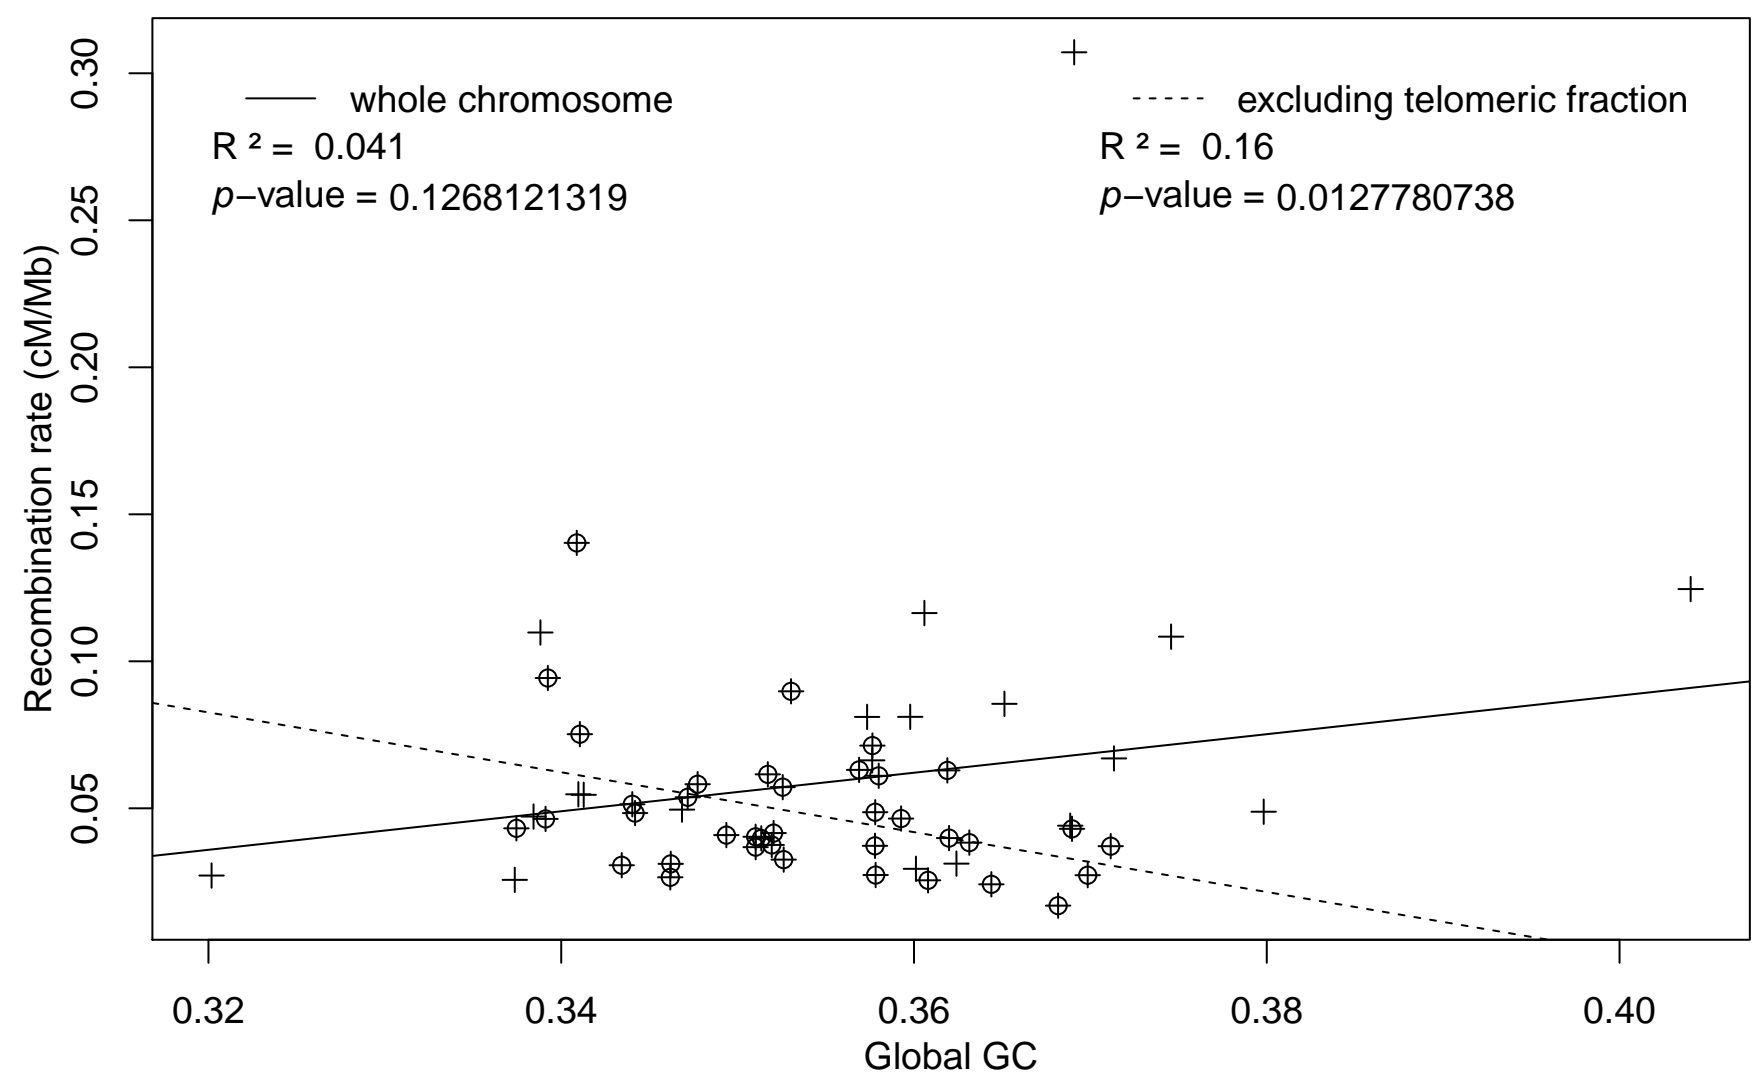**Female Chr 2 removing 30 % of total length VALUES Global GC**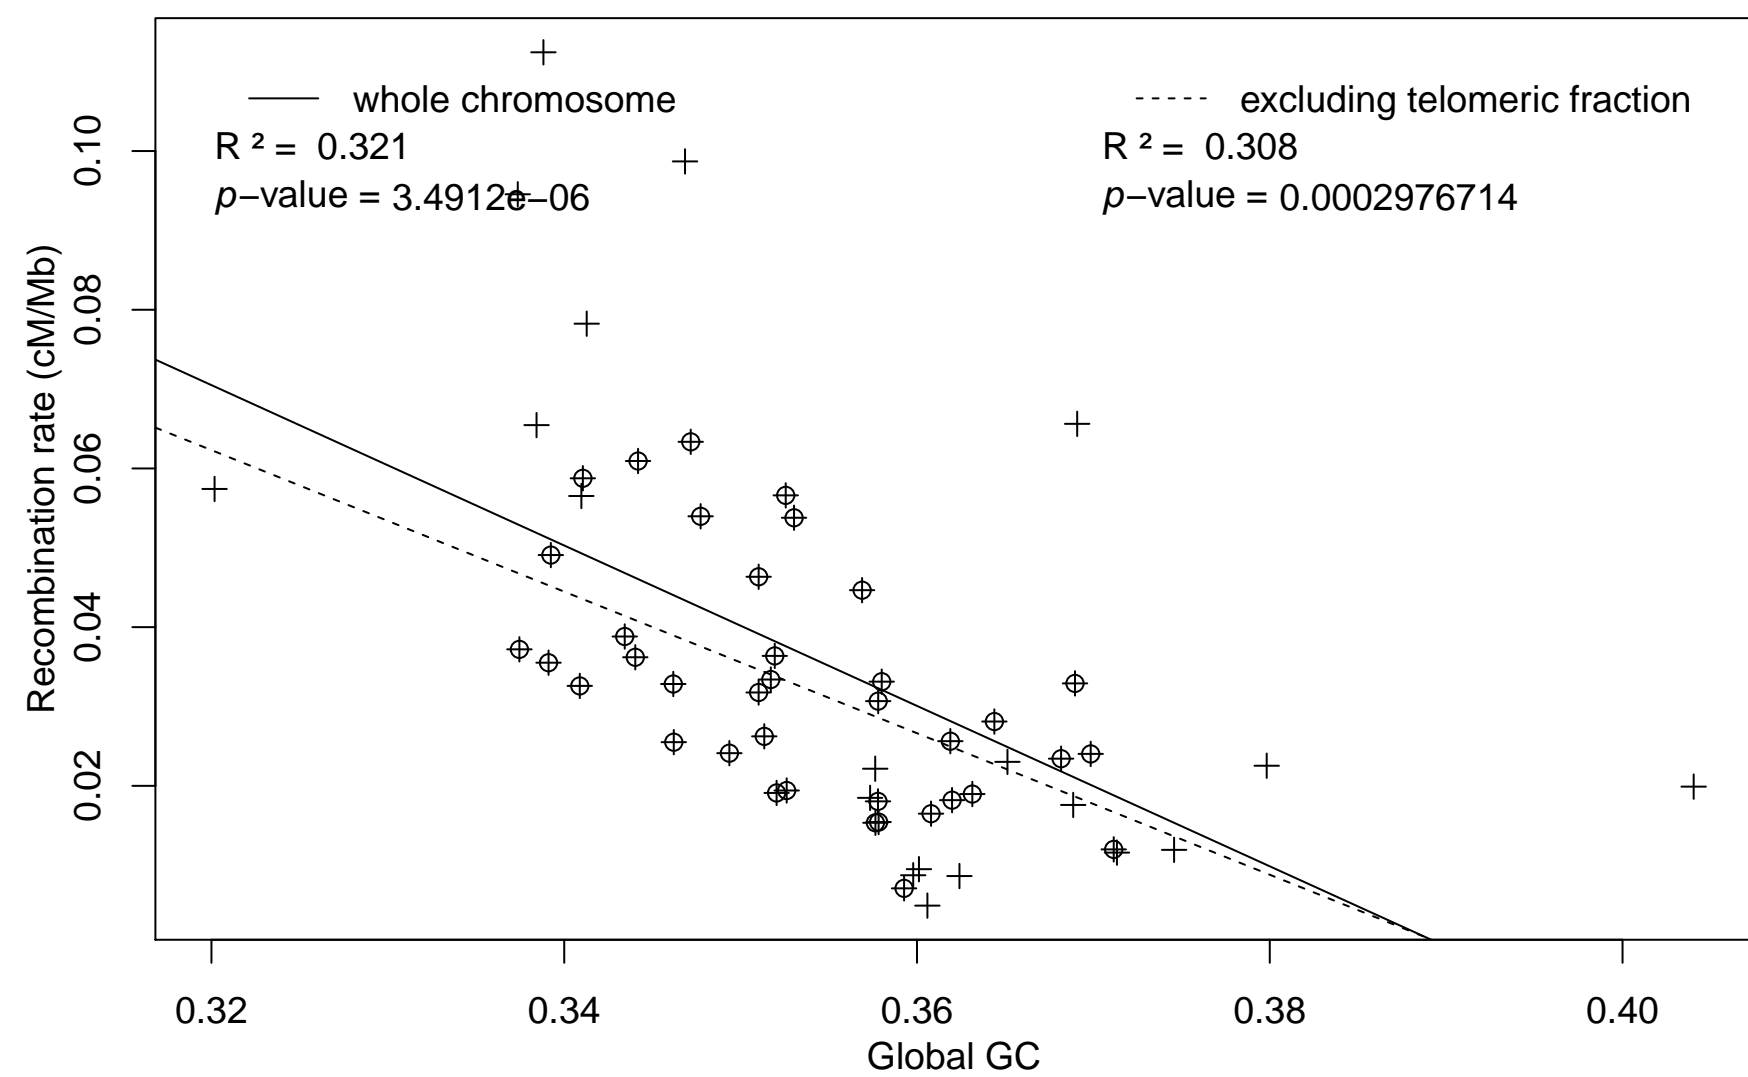**Male Chr 3 removing 30 % of total length VALUES Global GC**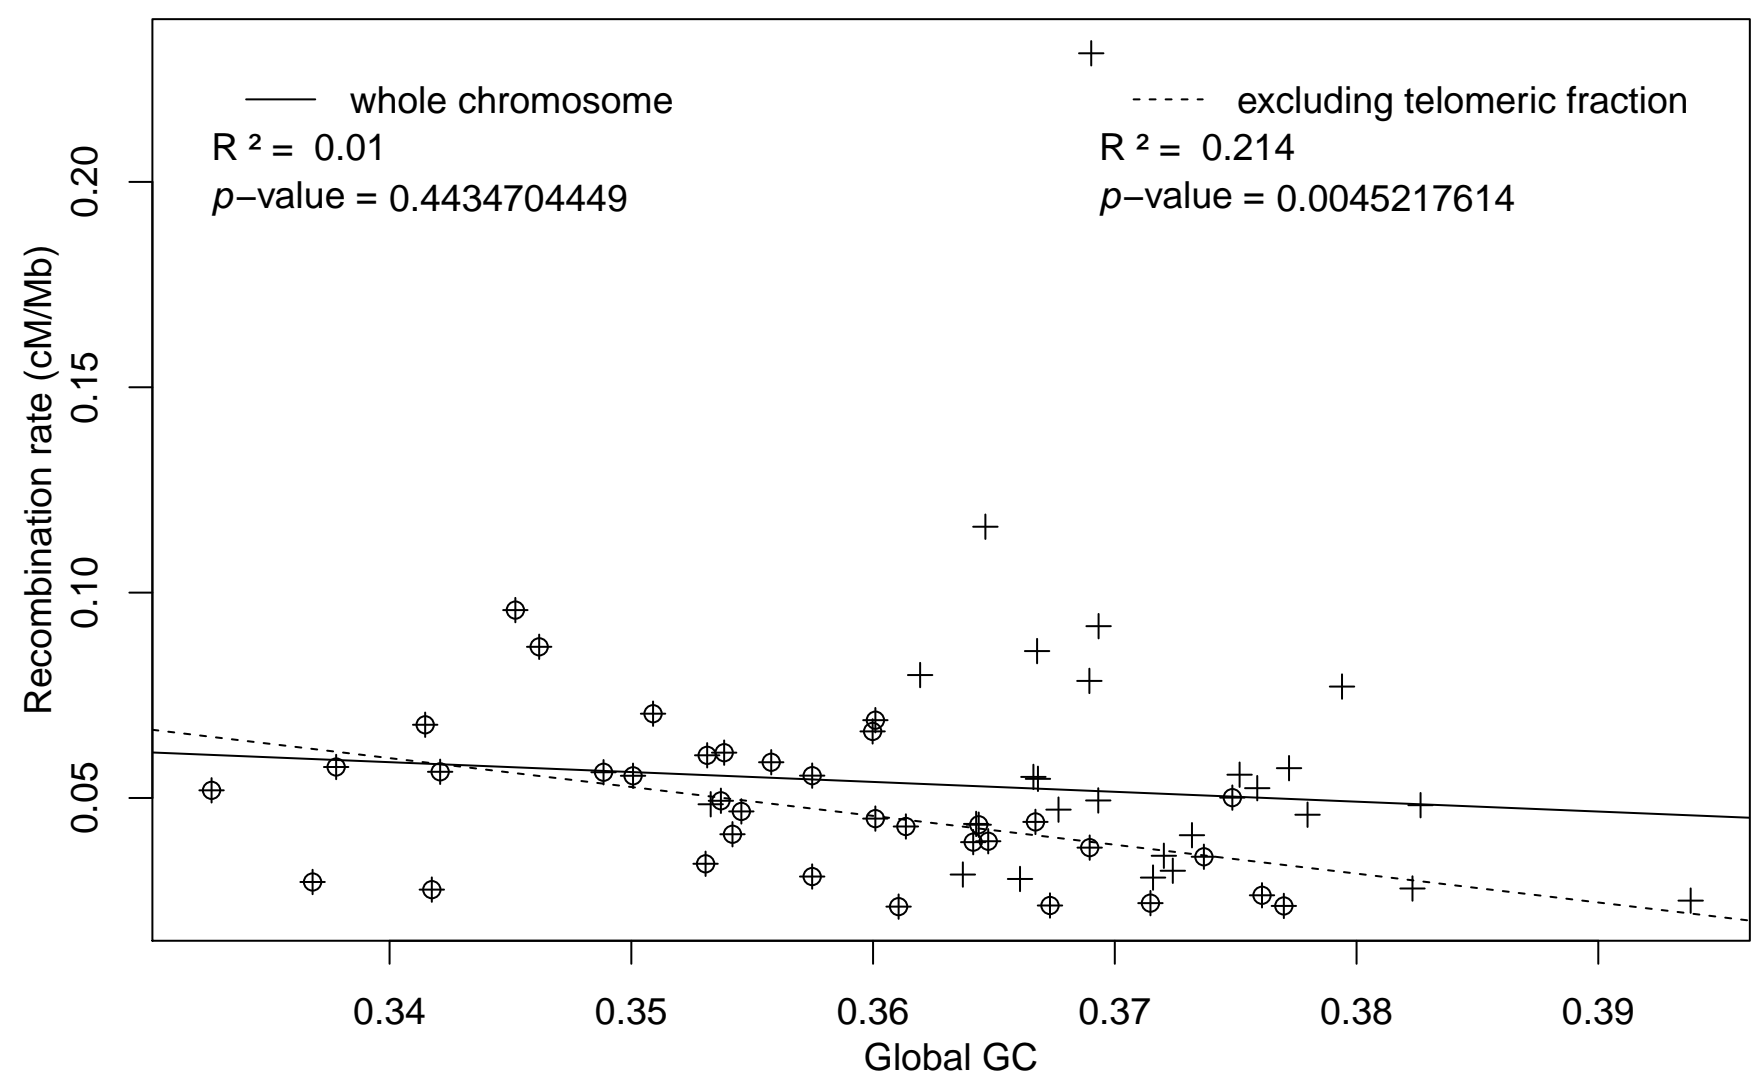**Female Chr 3 removing 30 % of total length VALUES Global GC**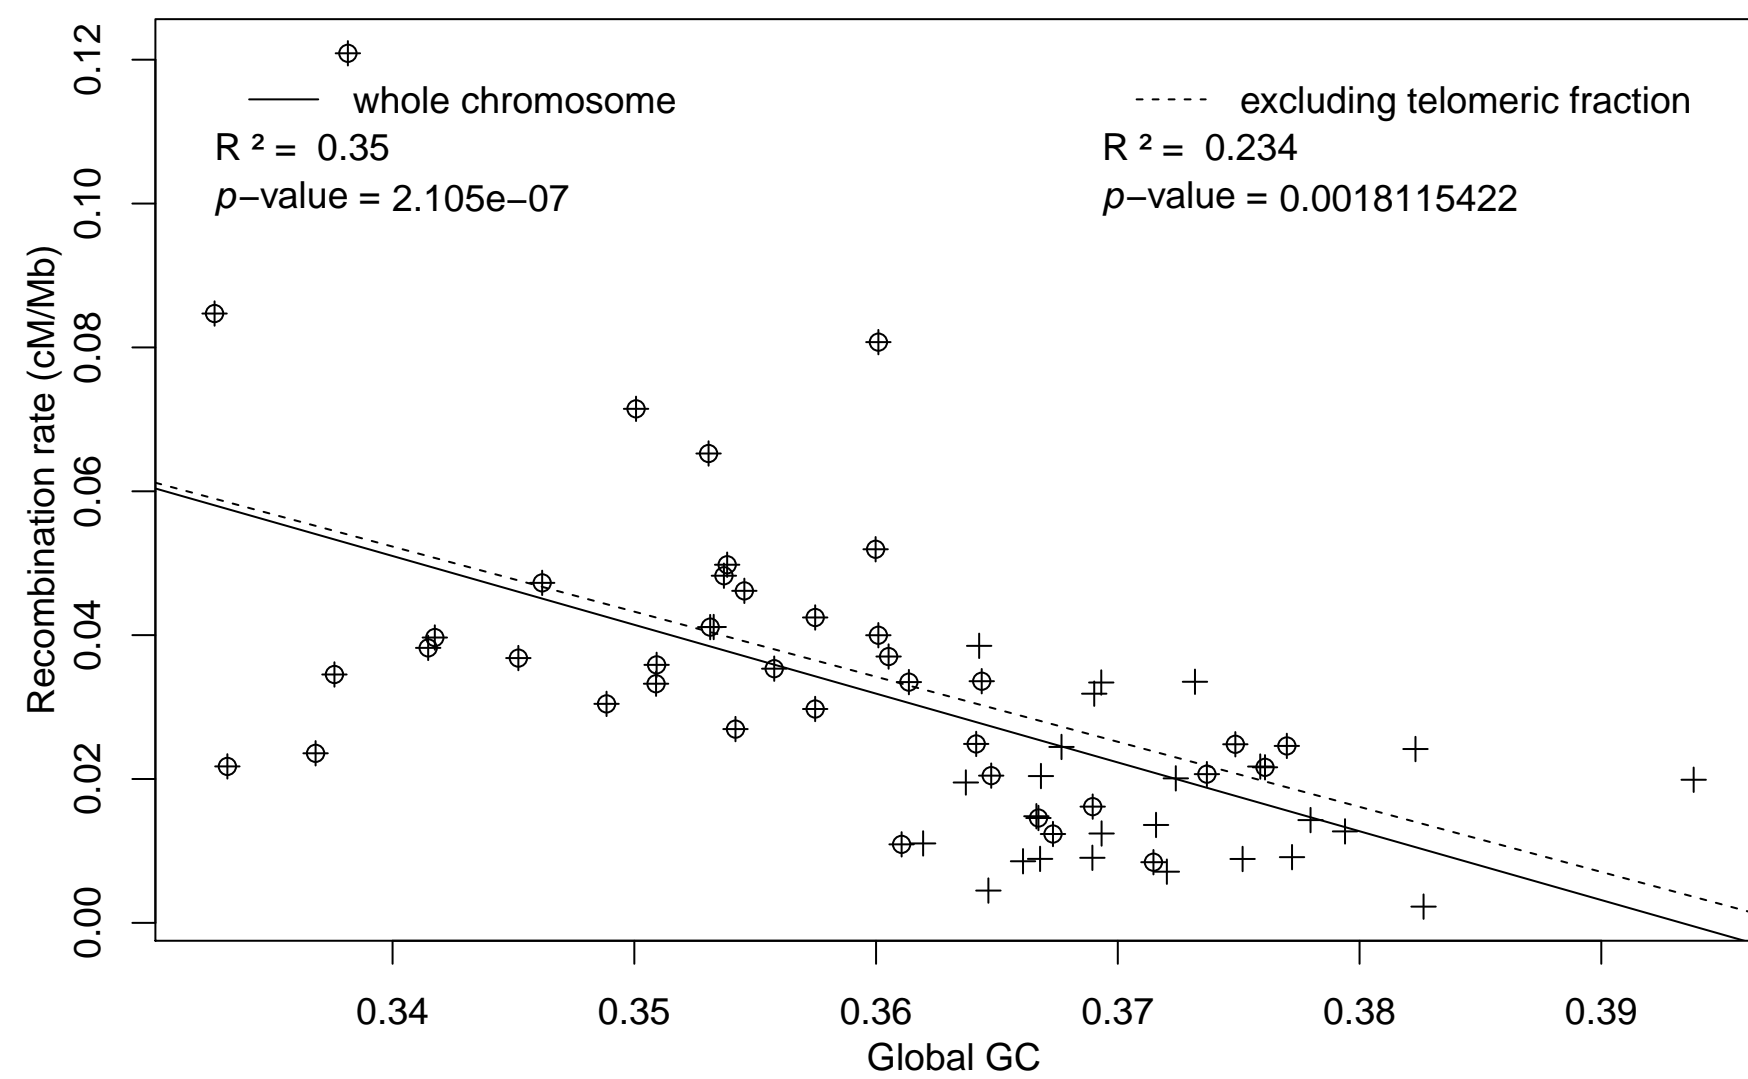**Male Chr 4 removing 30 % of total length VALUES Global GC**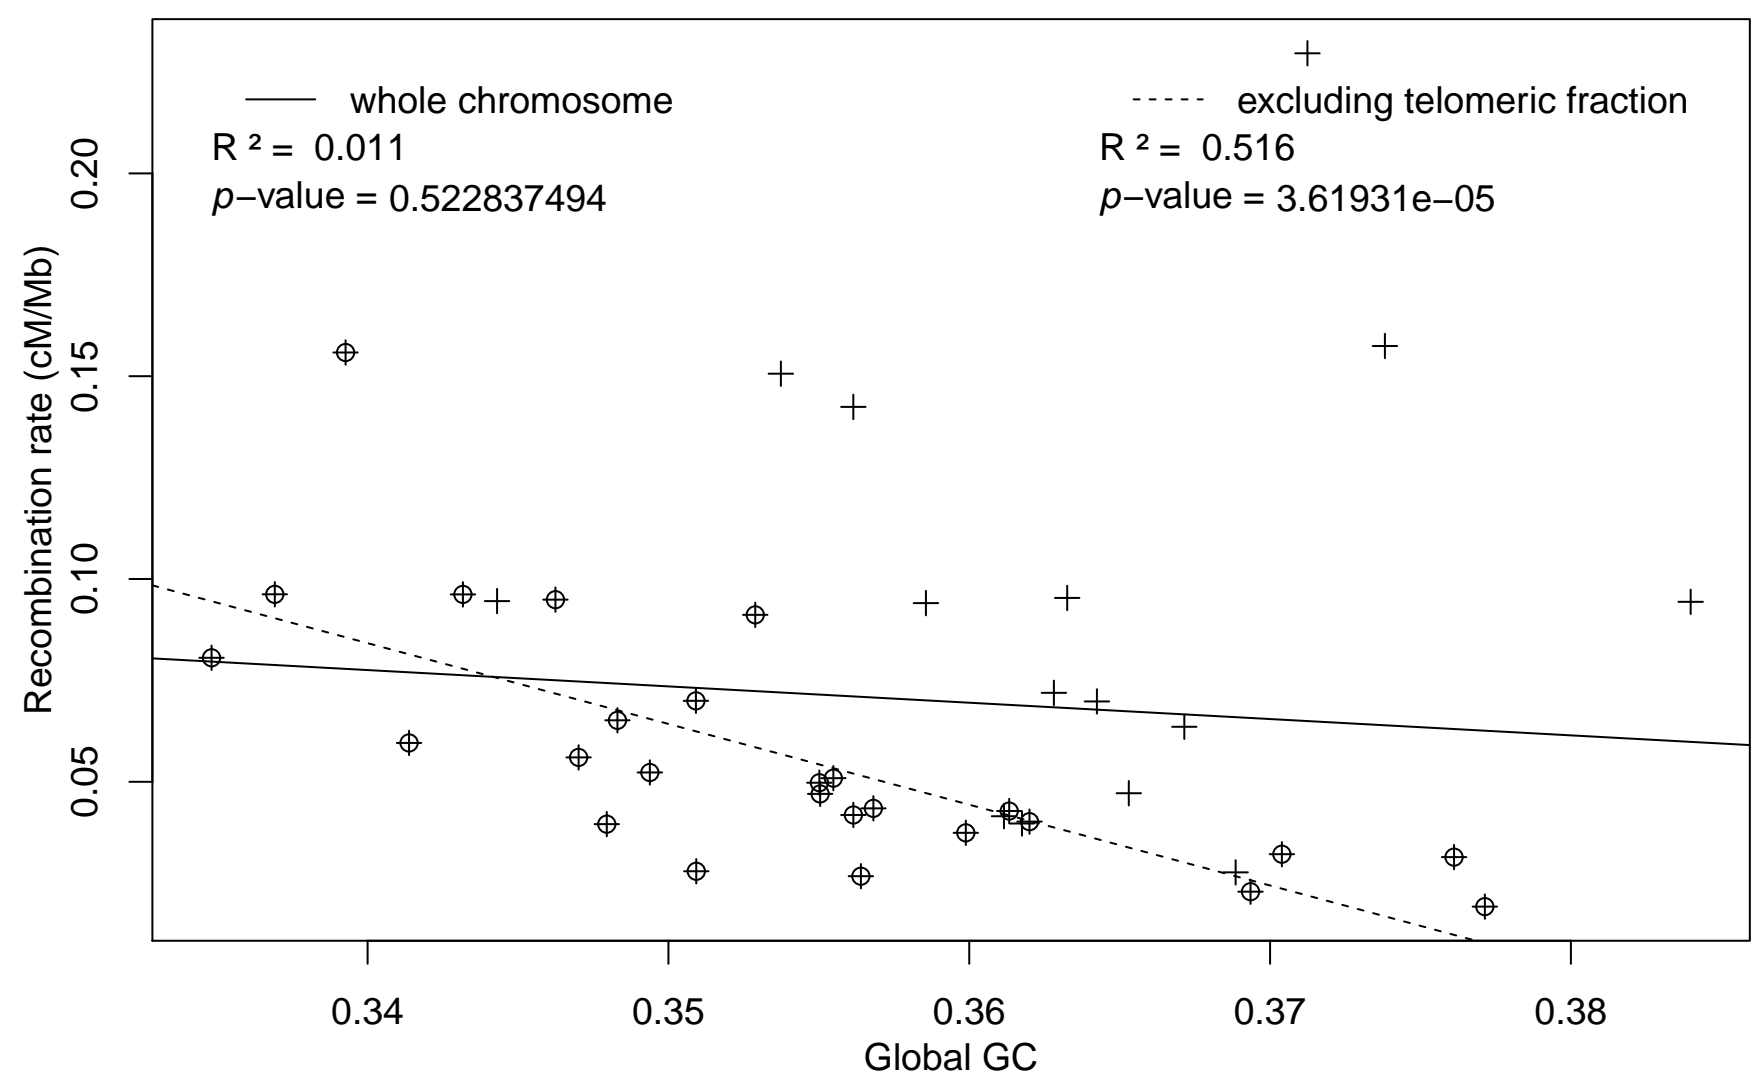**Female Chr 4 removing 30 % of total length VALUES Global GC**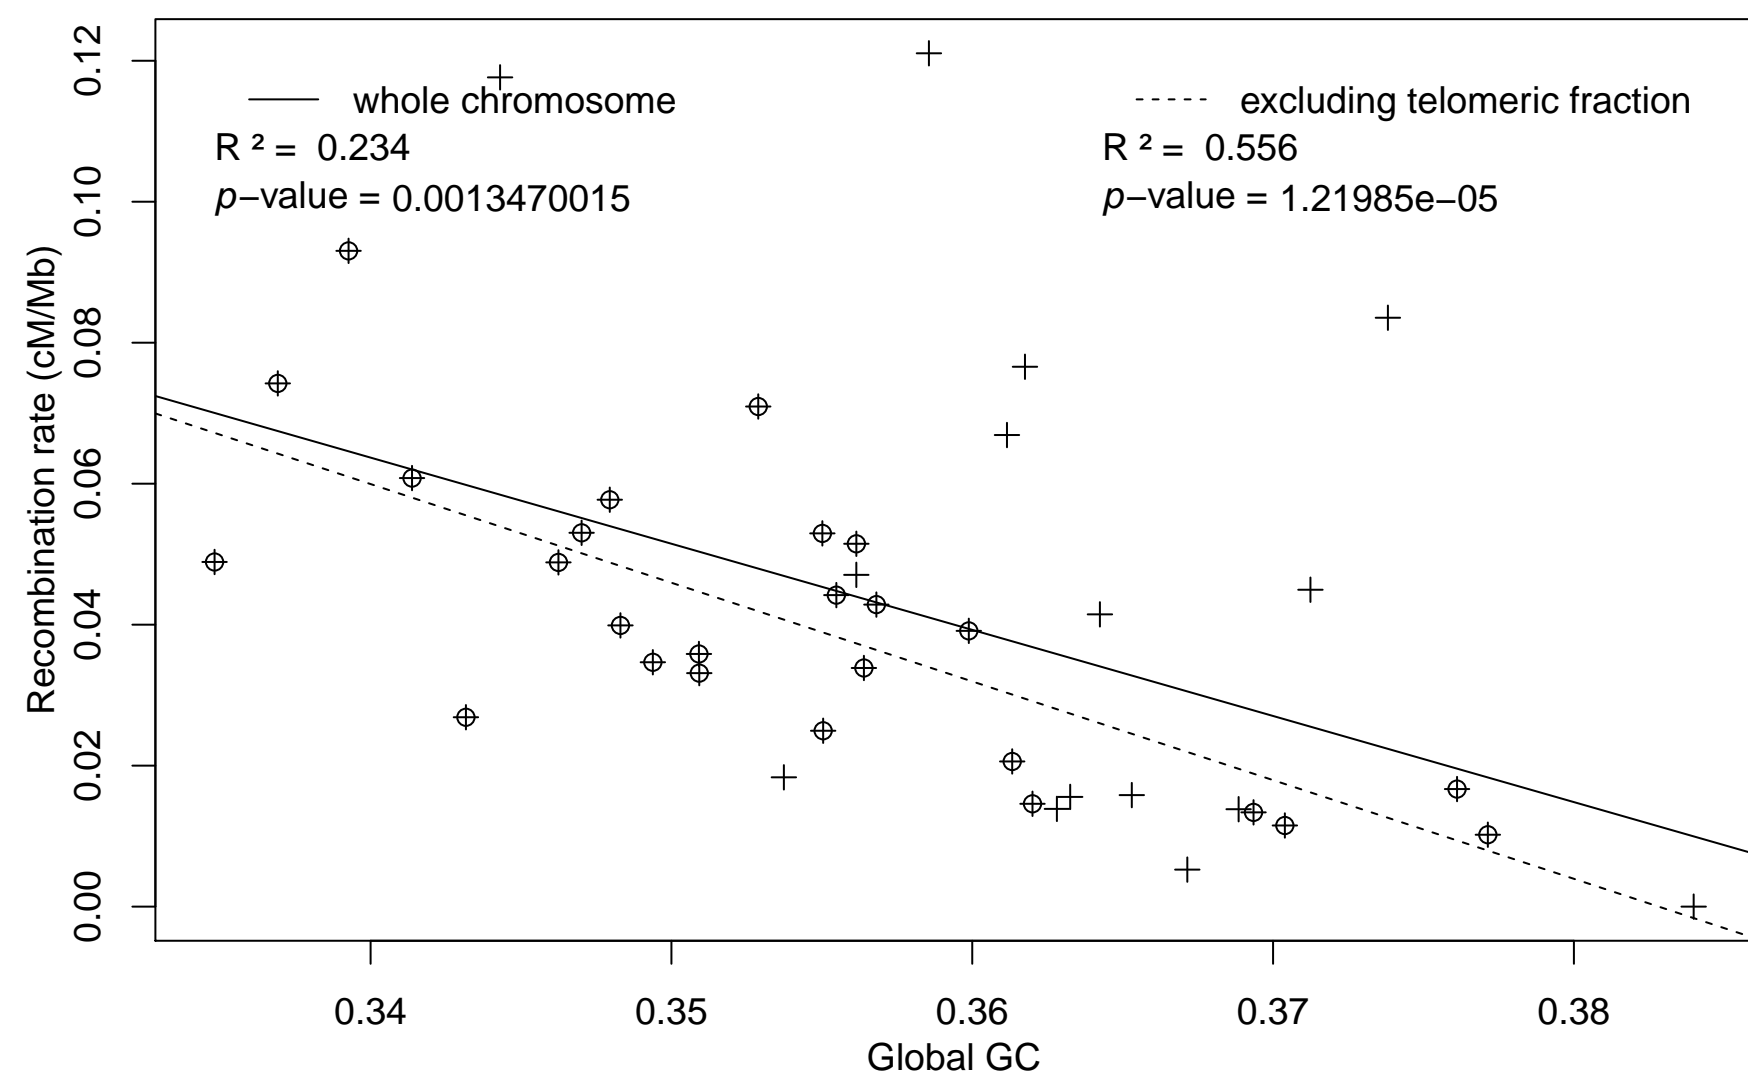**Male Chr 5 removing 30 % of total length VALUES Global GC**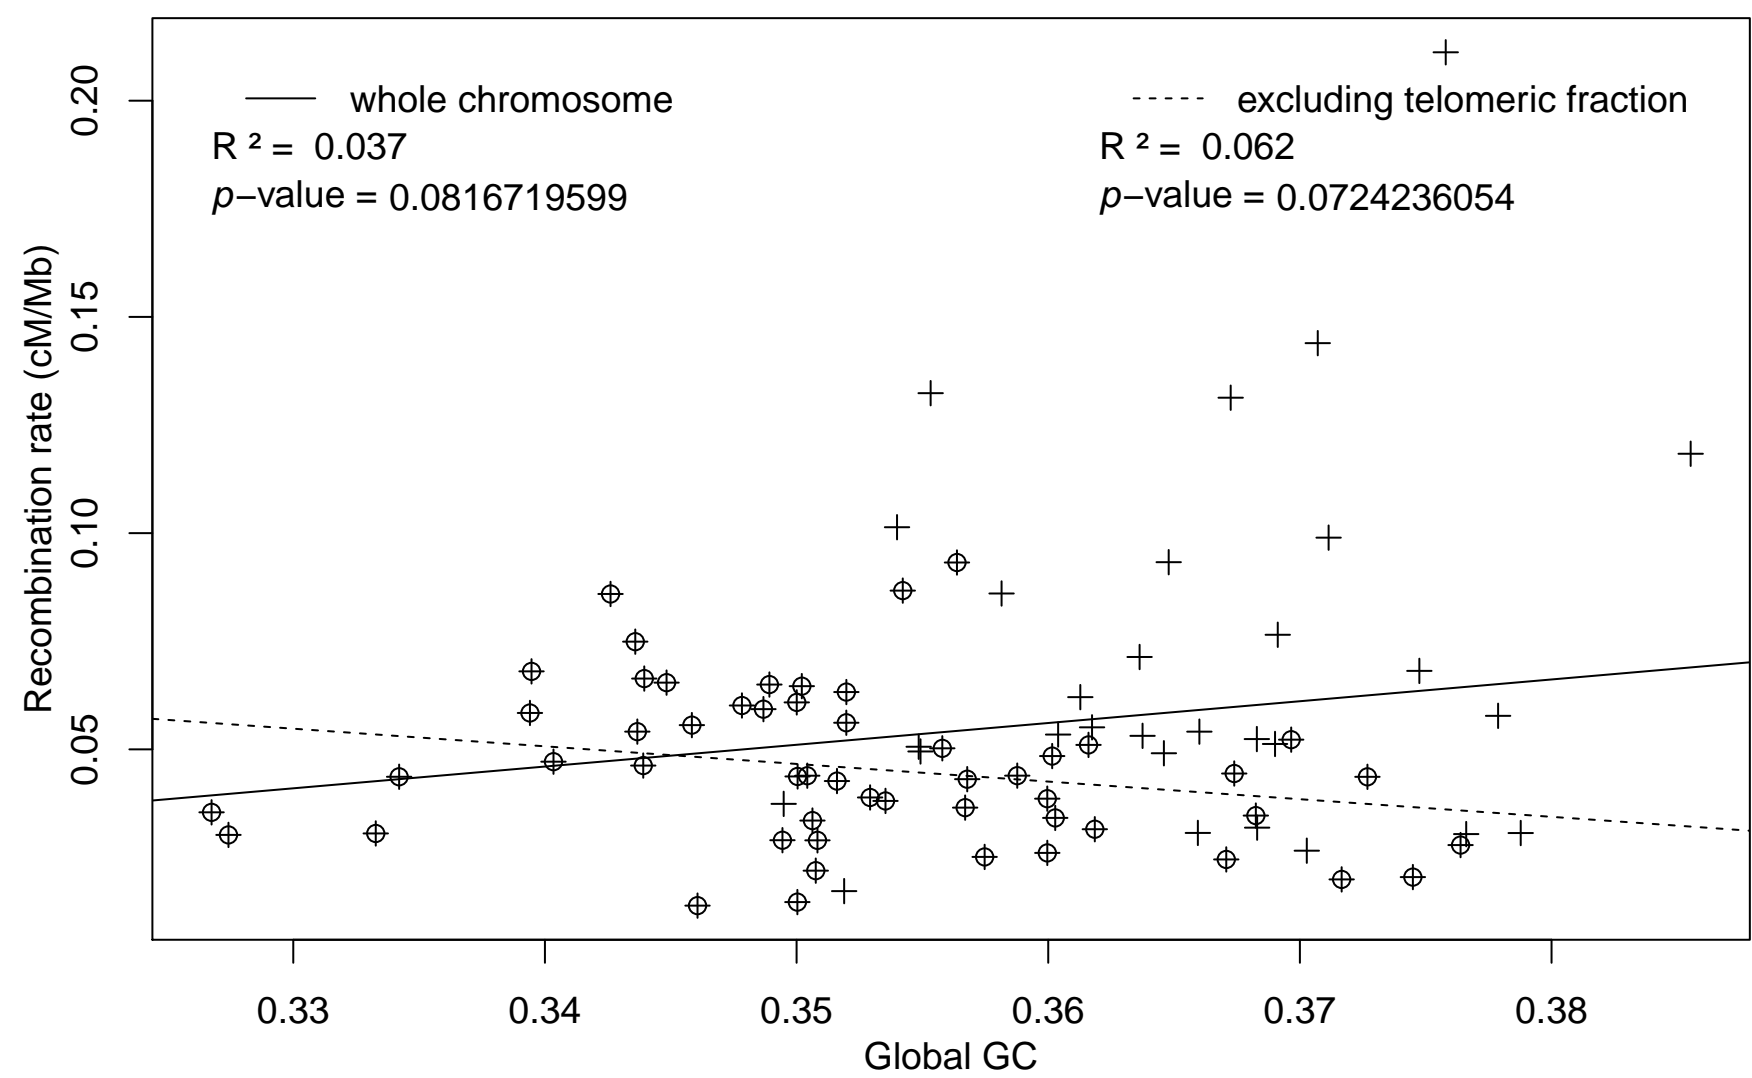**Female Chr 5 removing 30 % of total length VALUES Global GC**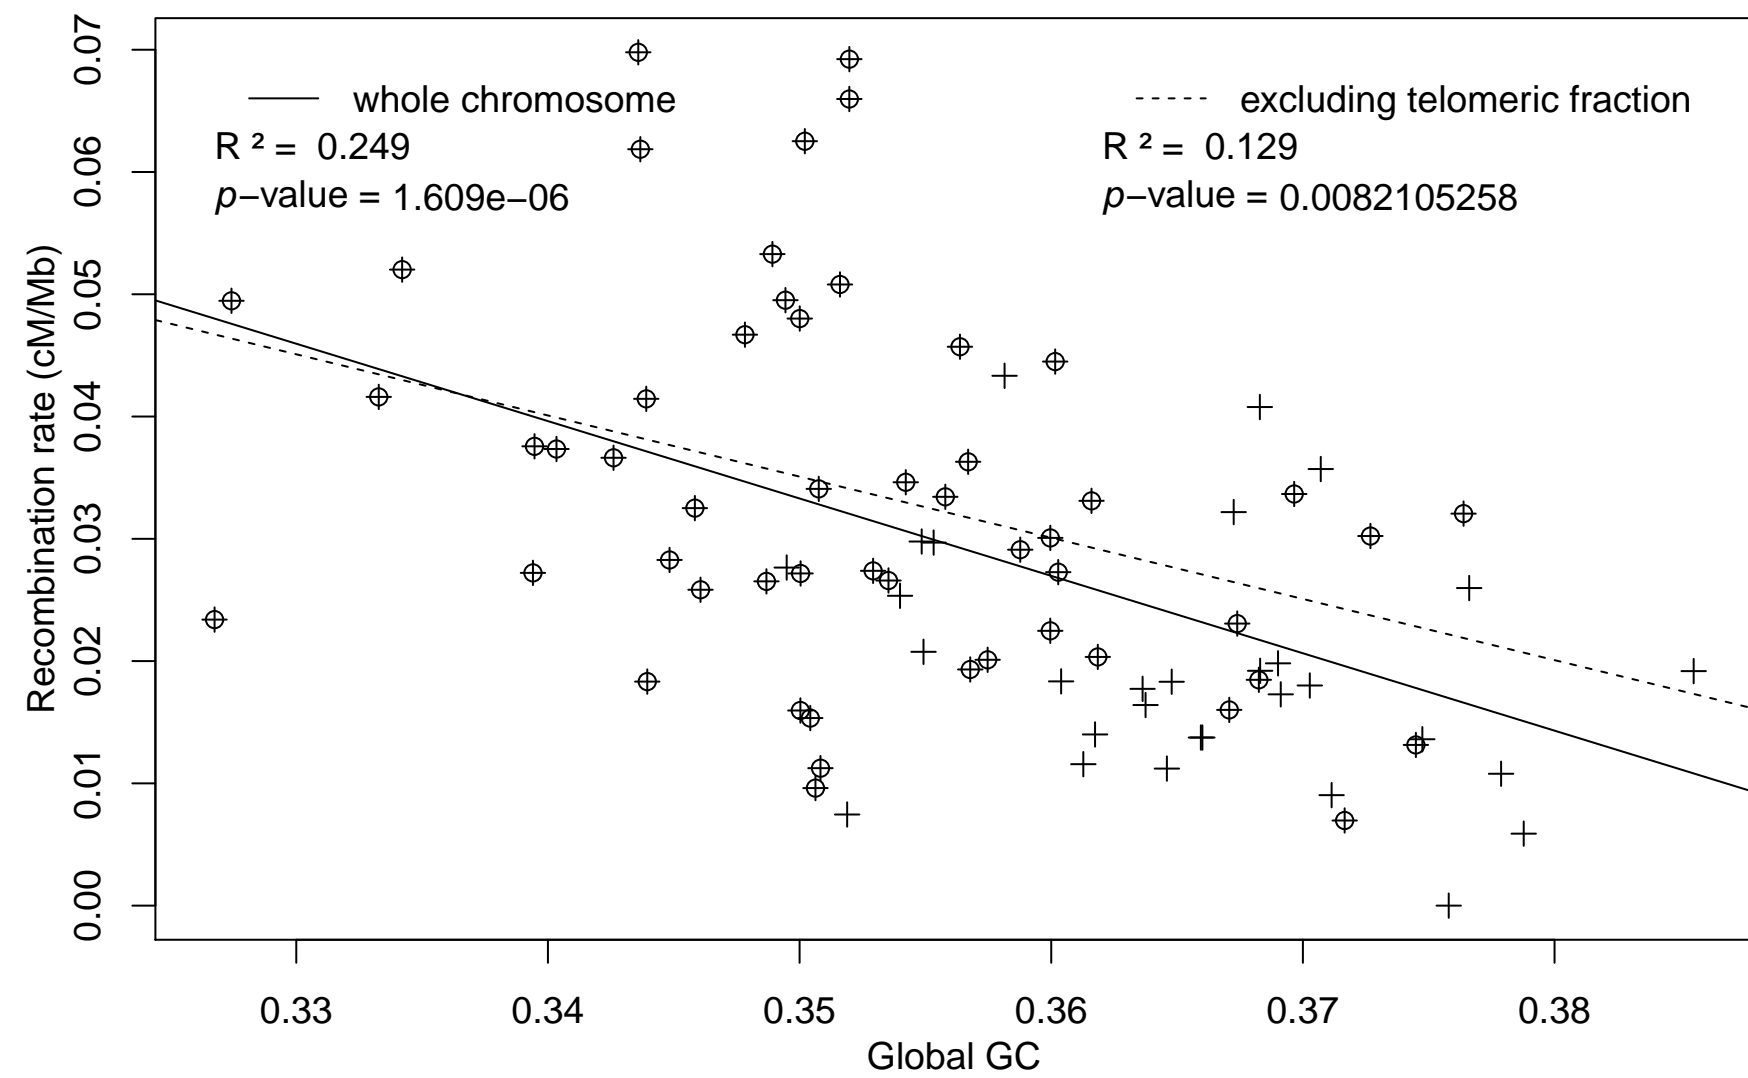

Male Chr 1 removing 50 % of total length VALUES Global GC

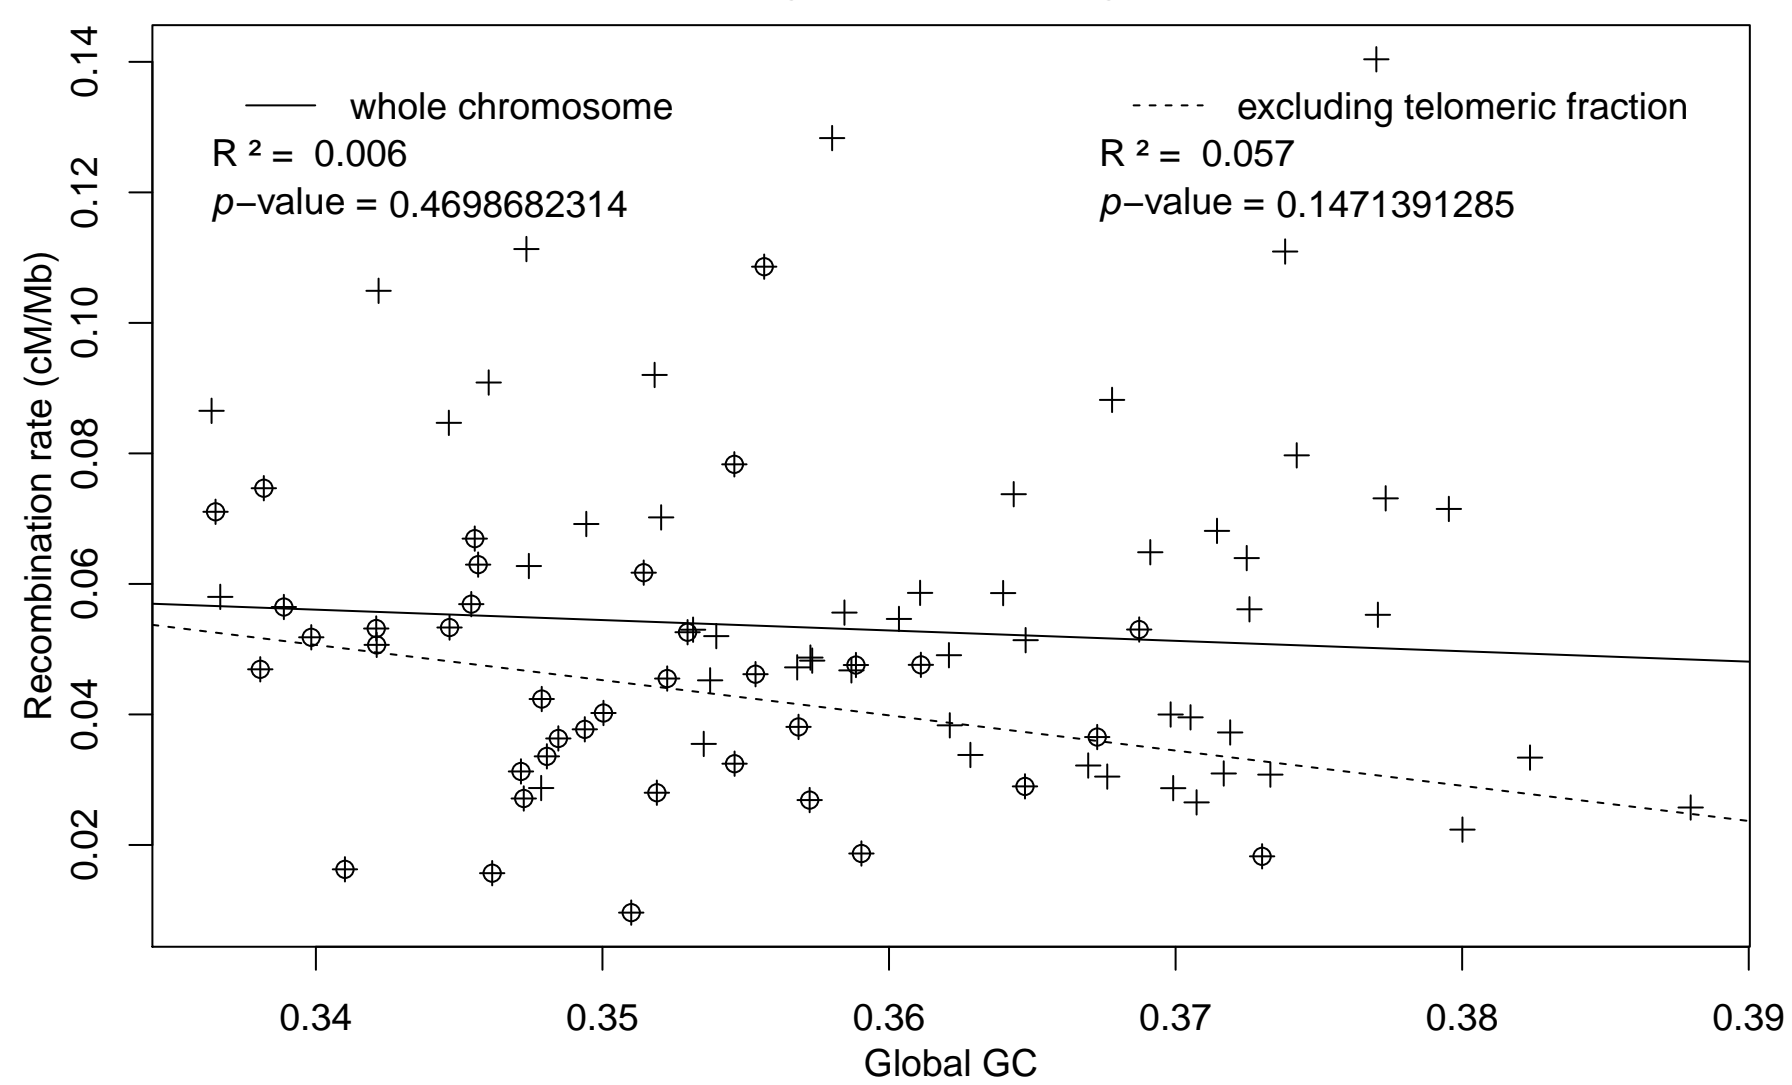

Female Chr 1 removing 50 % of total length VALUES Global GC

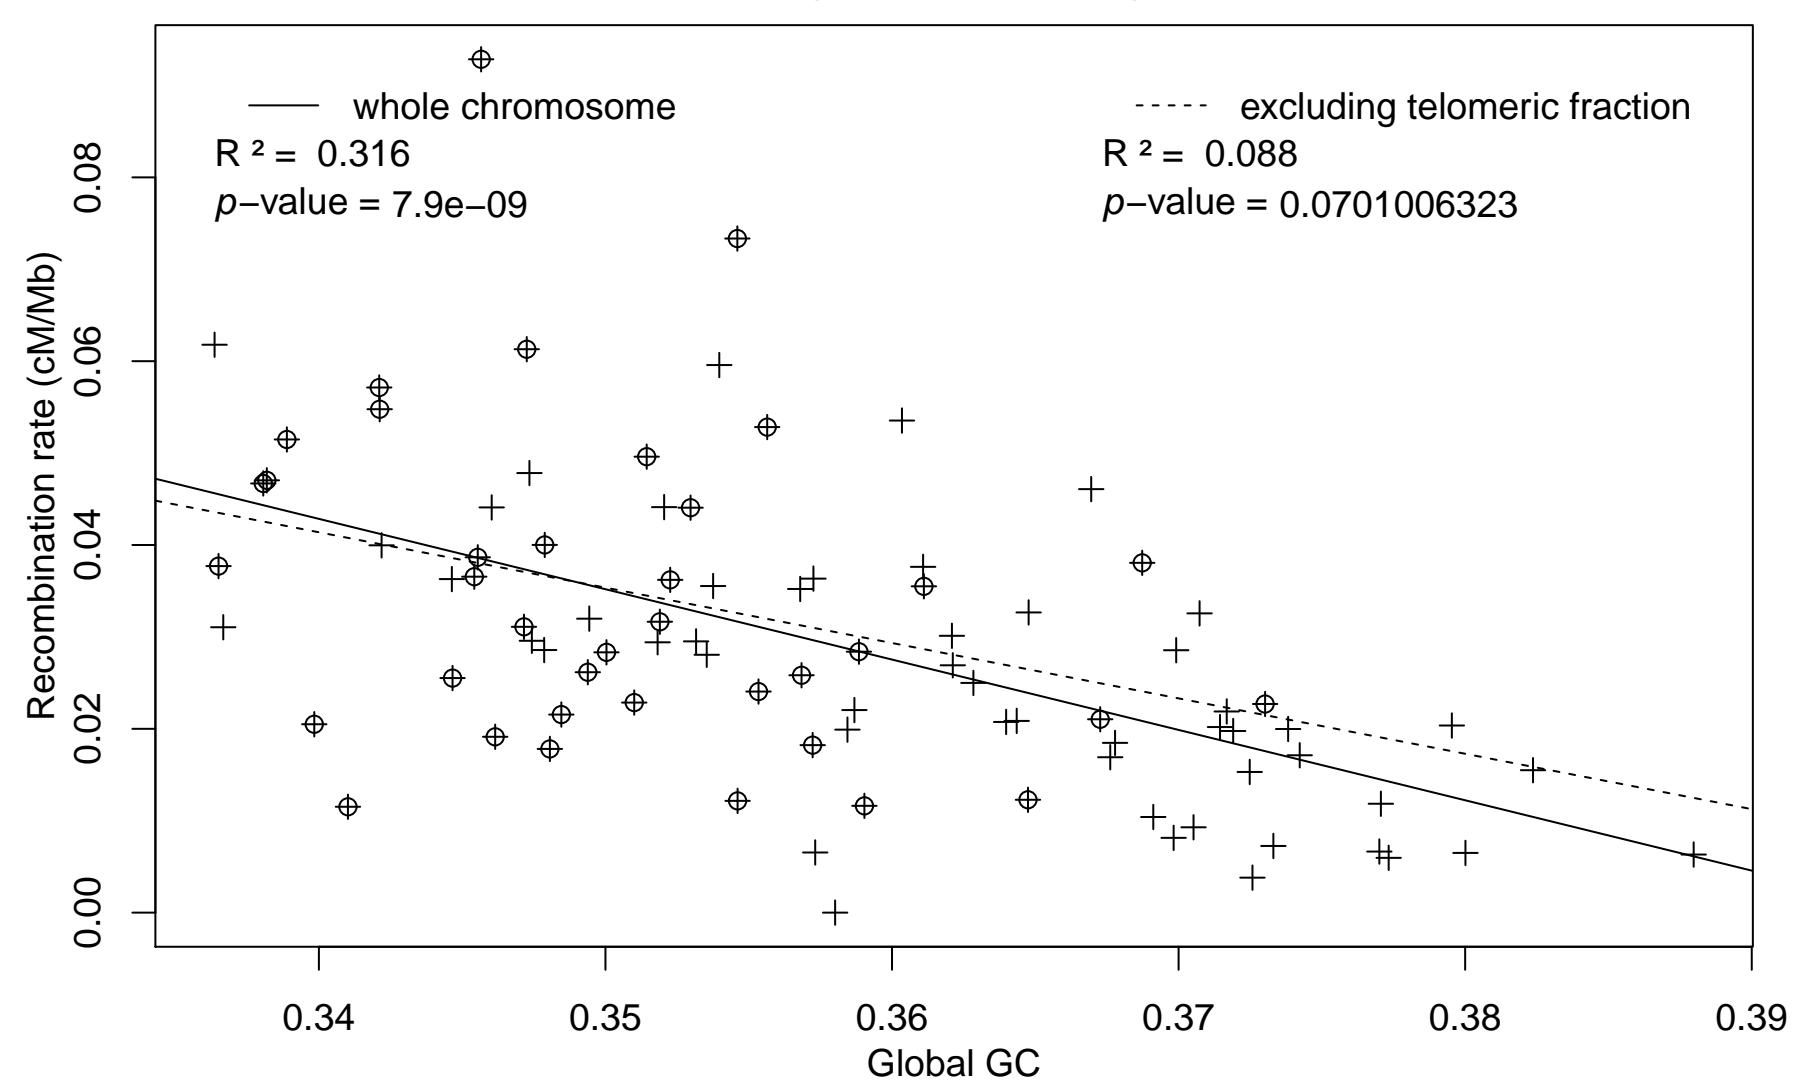

Male Chr 2 removing 50 % of total length VALUES Global GC

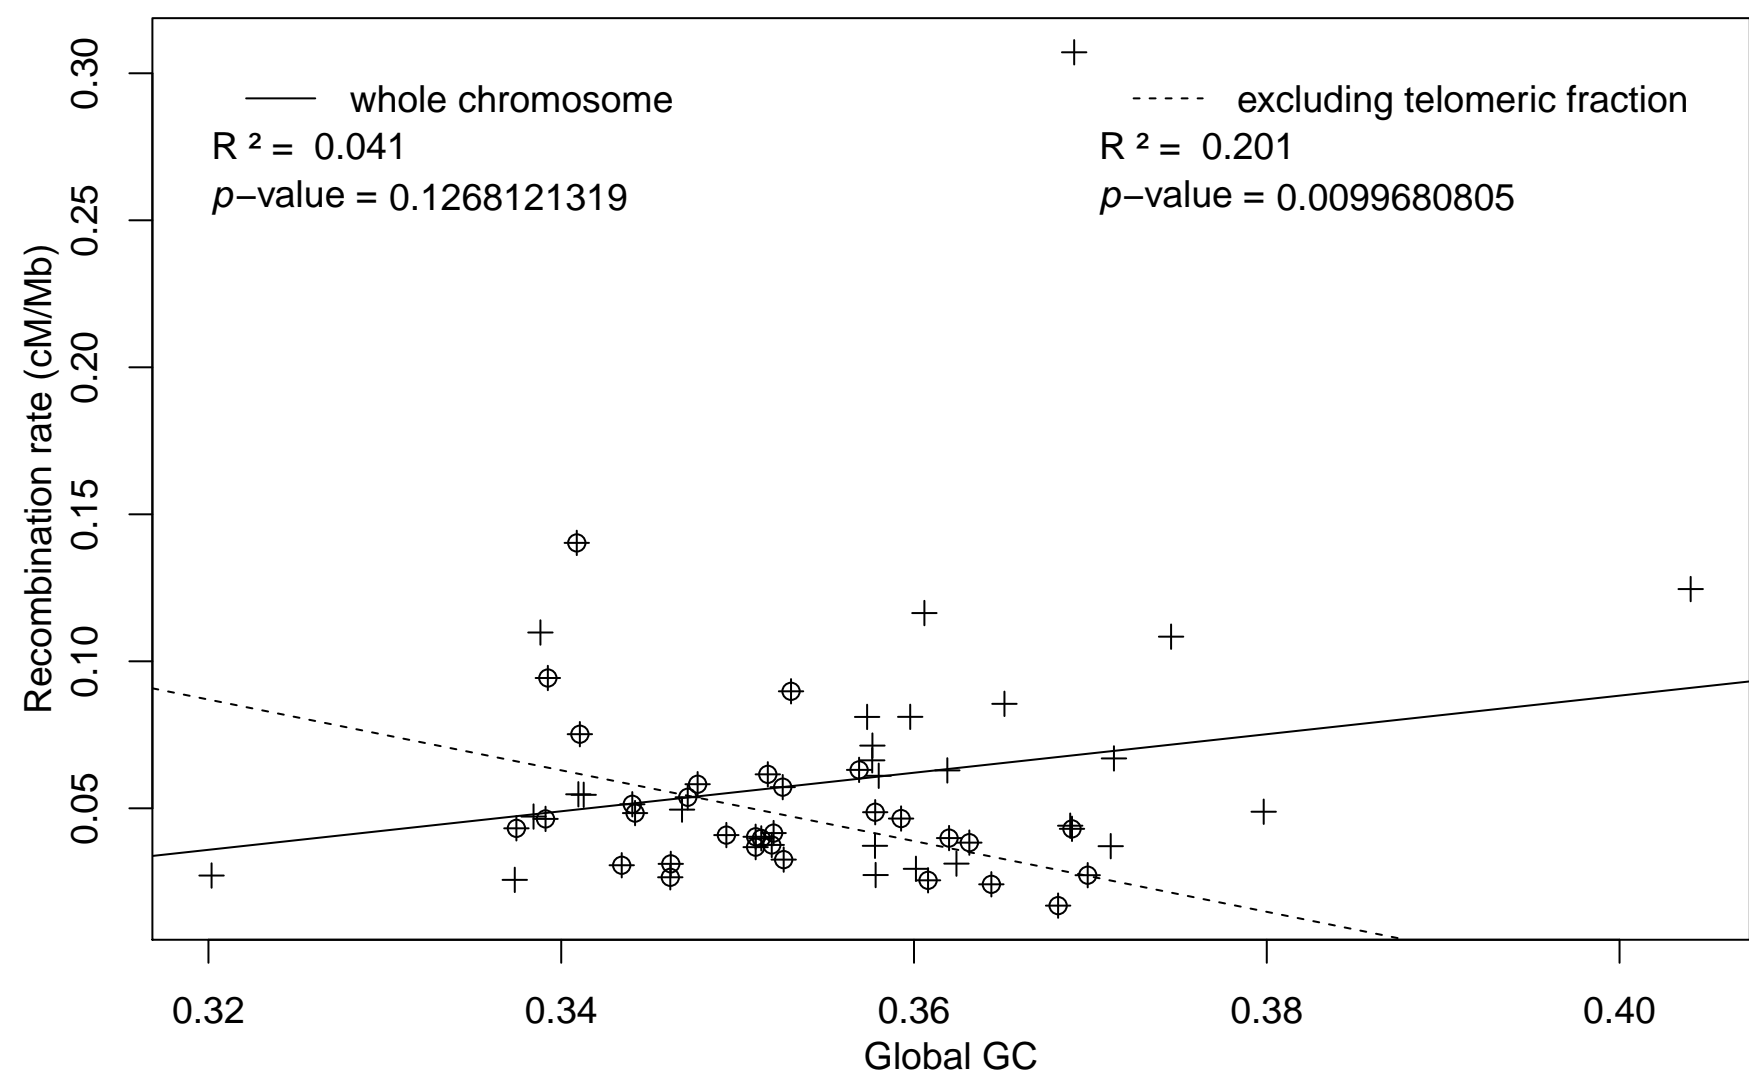

Female Chr 2 removing 50 % of total length VALUES Global GC

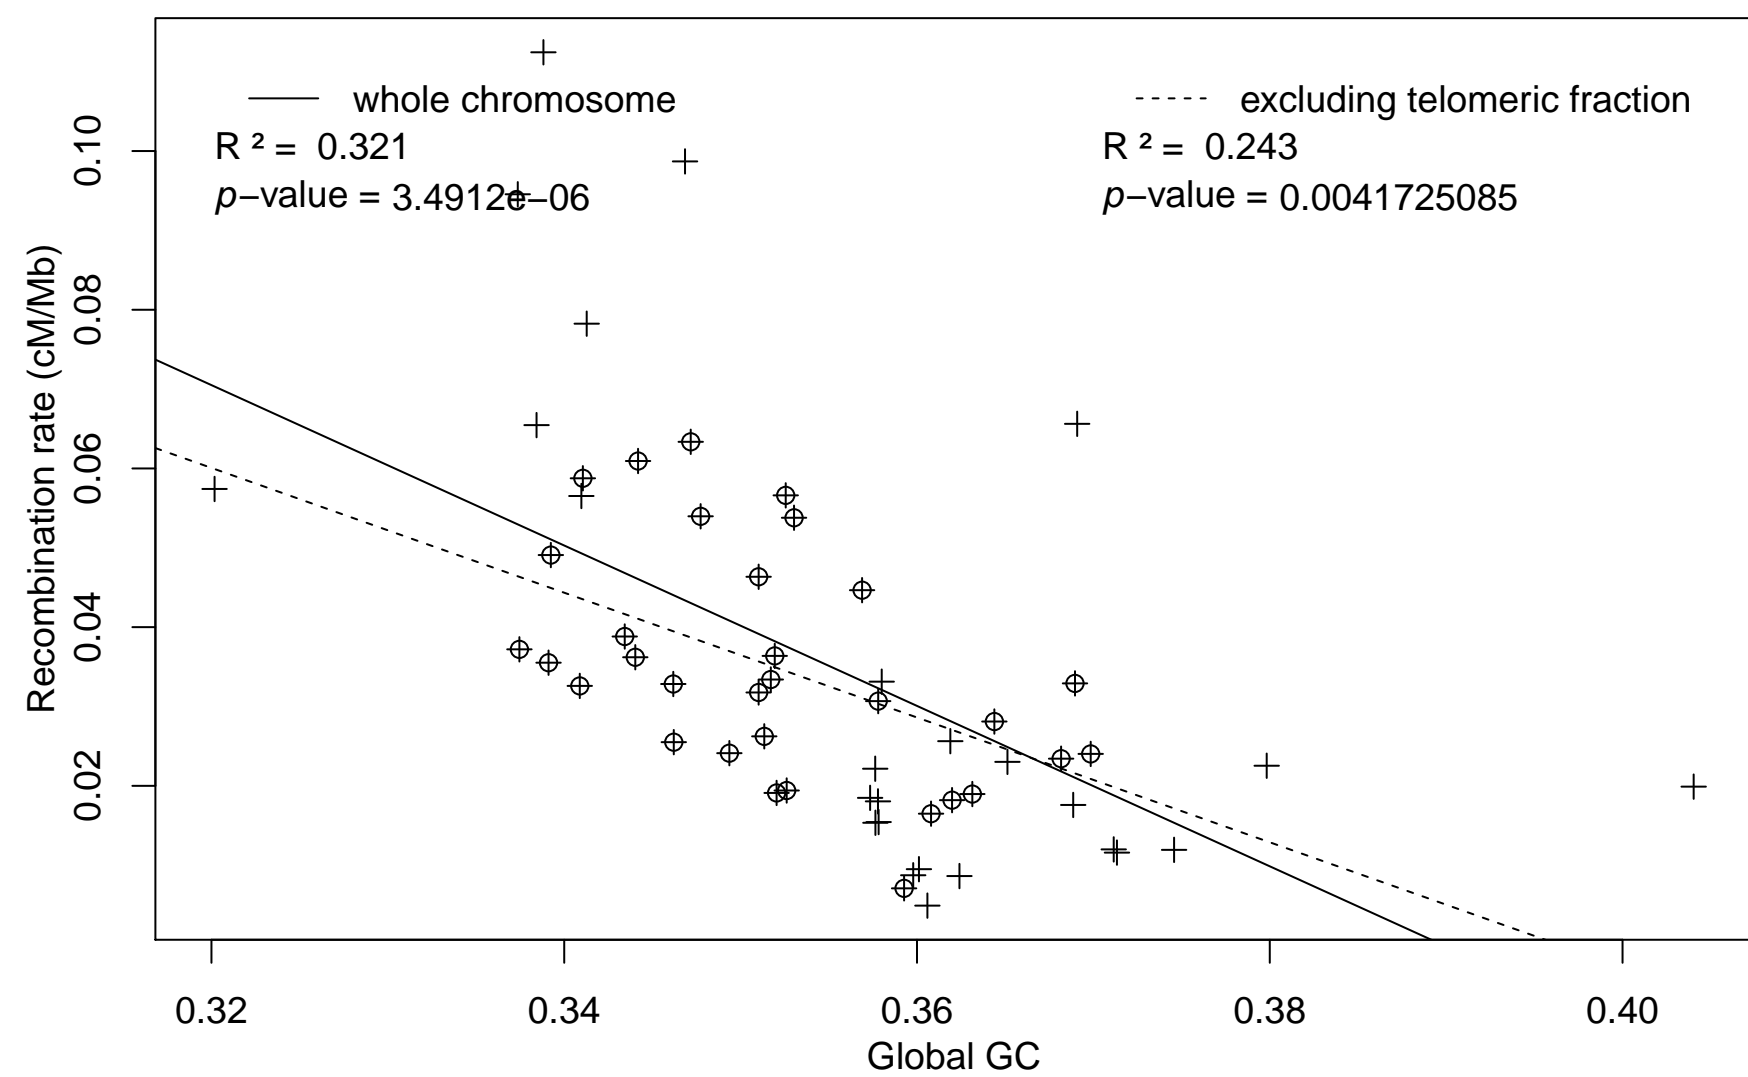

Male Chr 3 removing 50 % of total length VALUES Global GC

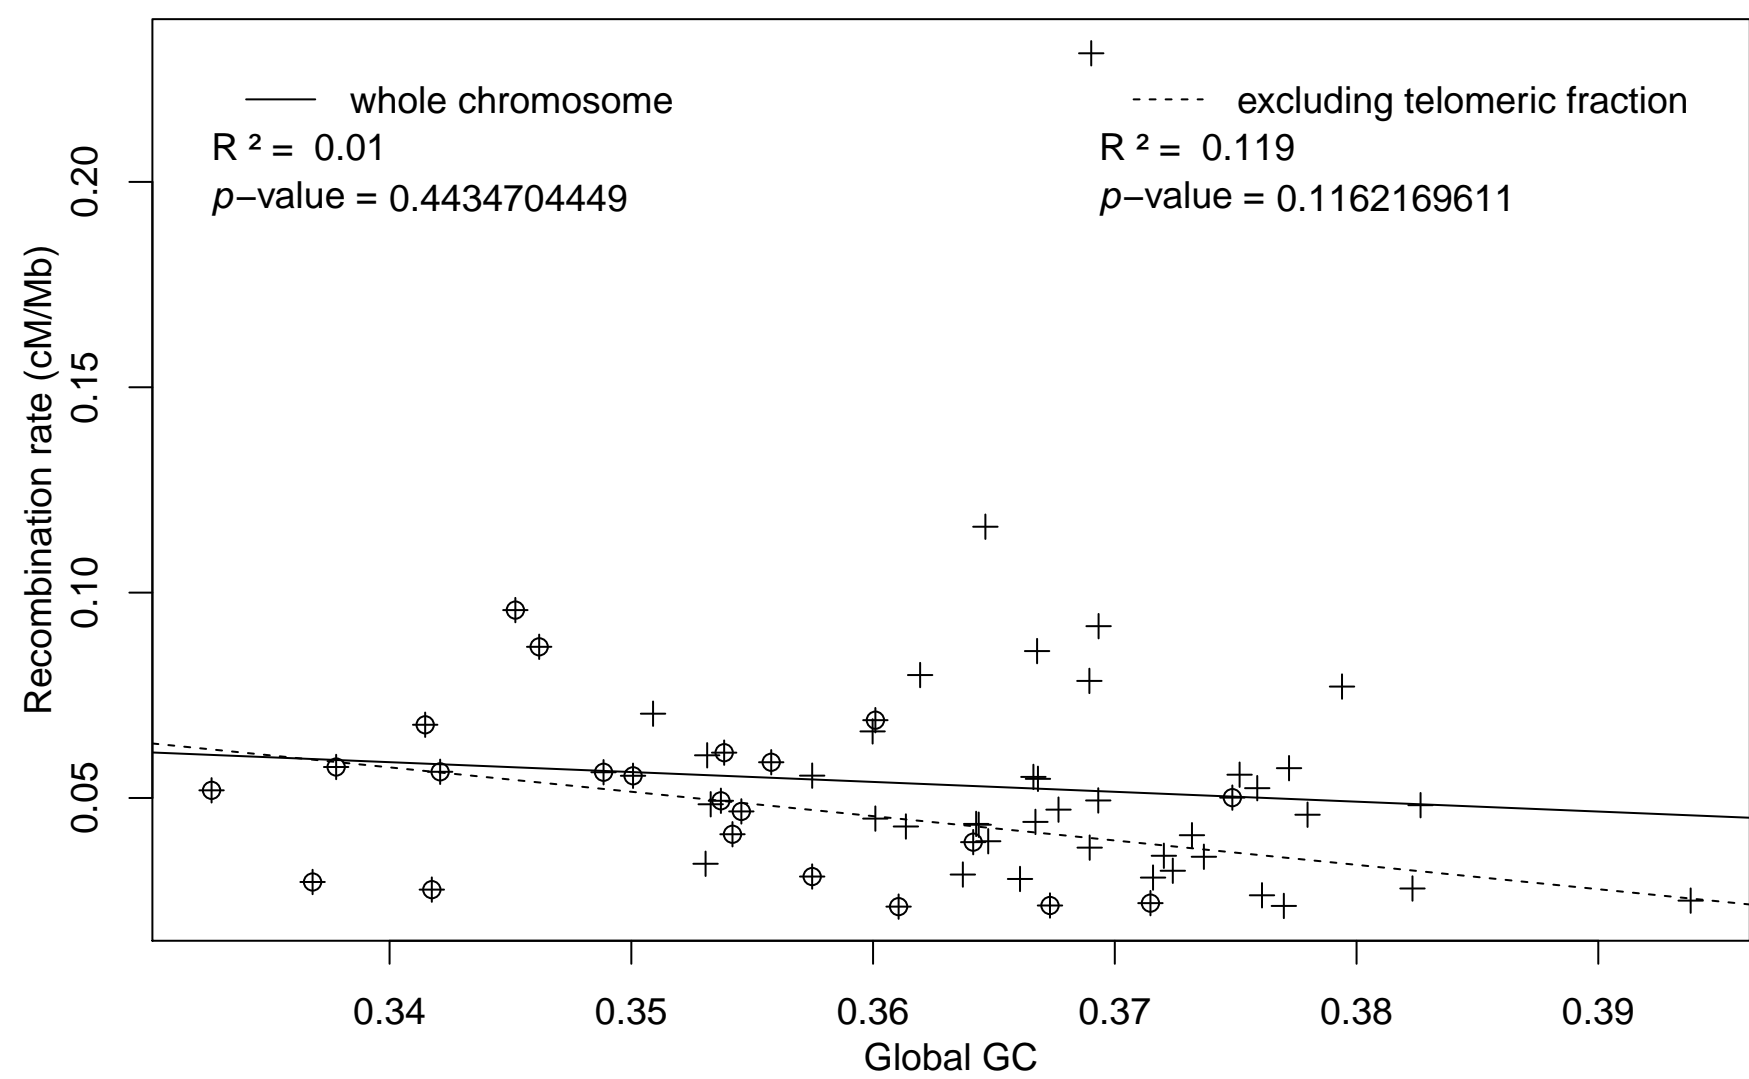

Female Chr 3 removing 50 % of total length VALUES Global GC

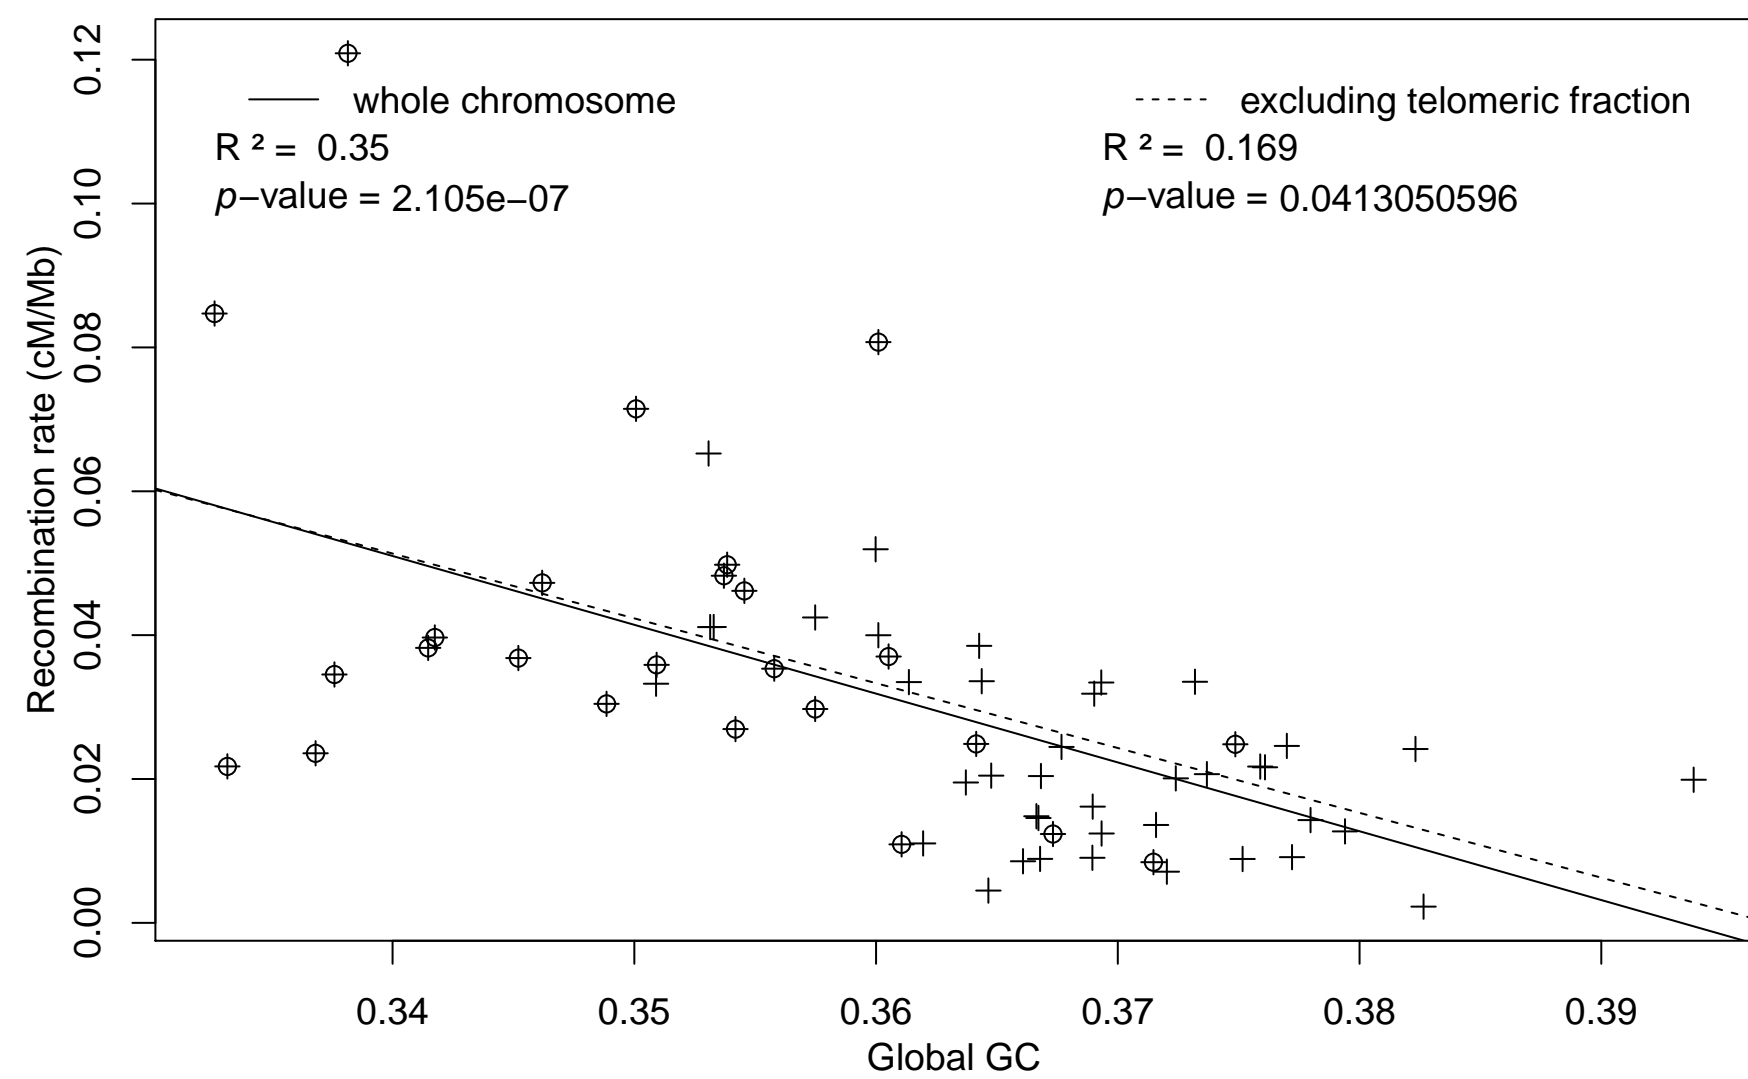

Male Chr 4 removing 50 % of total length VALUES Global GC

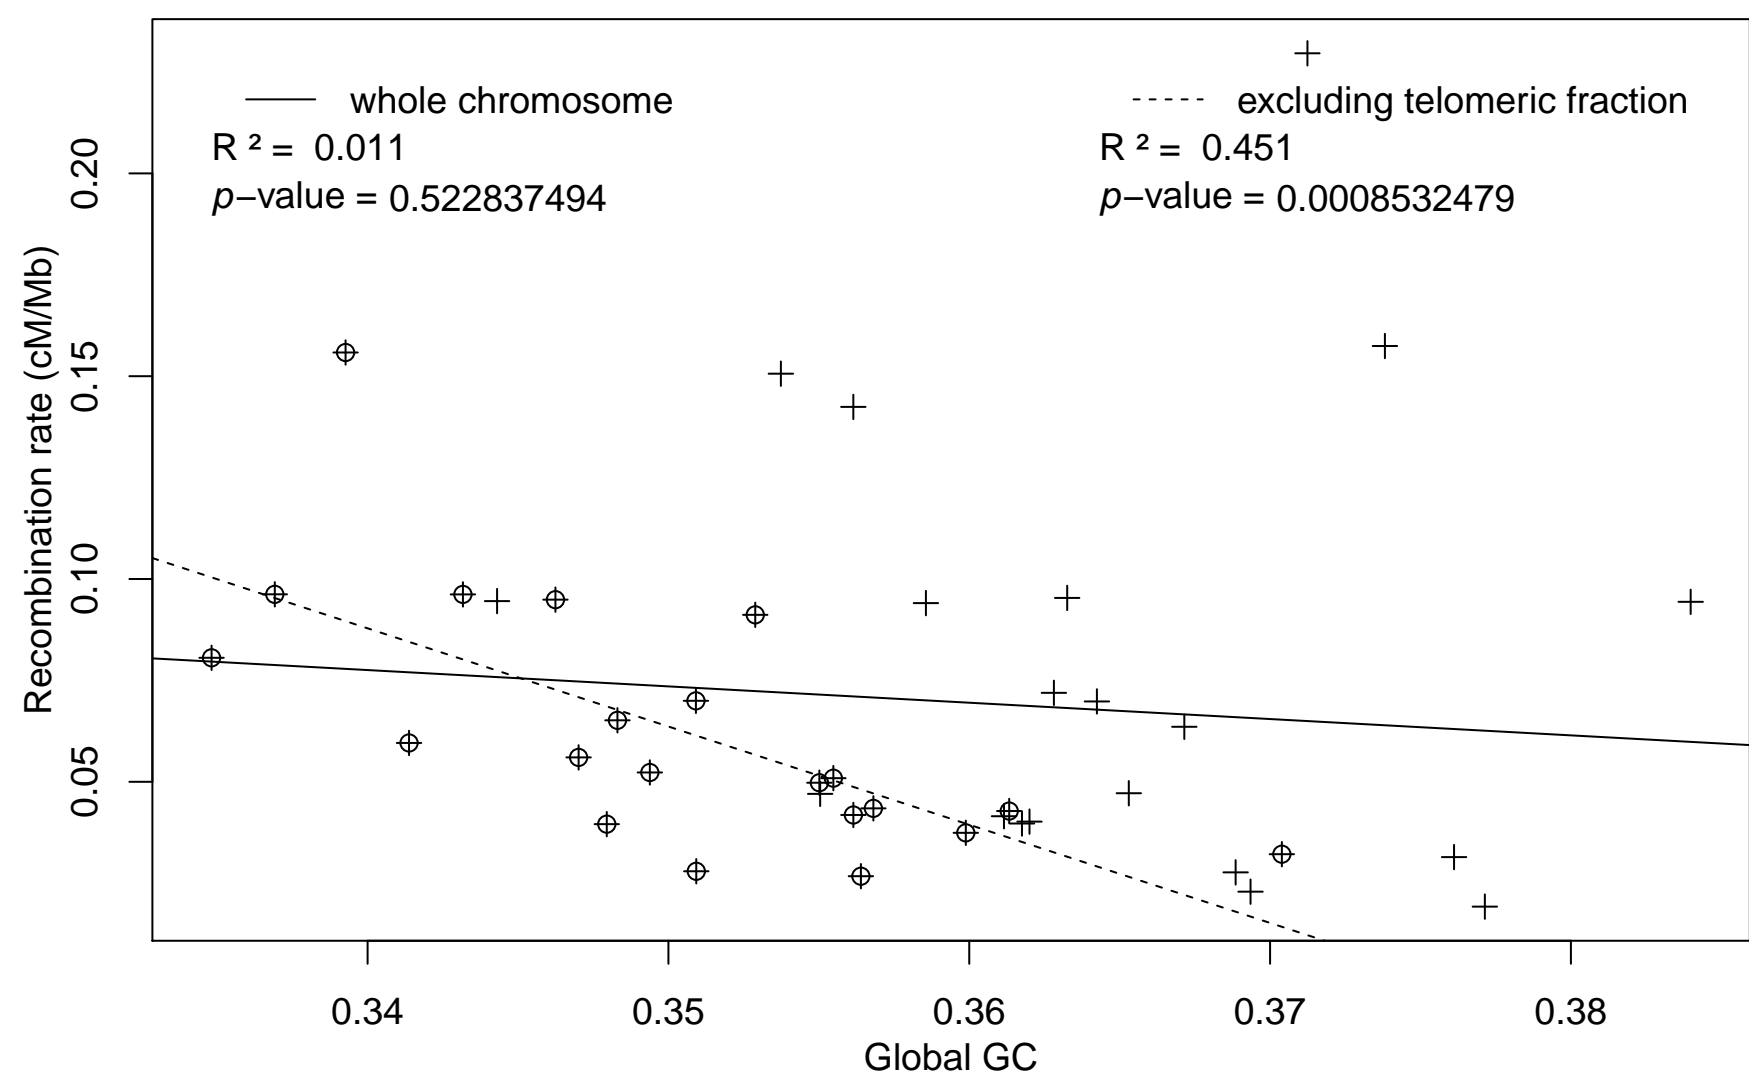

Female Chr 4 removing 50 % of total length VALUES Global GC

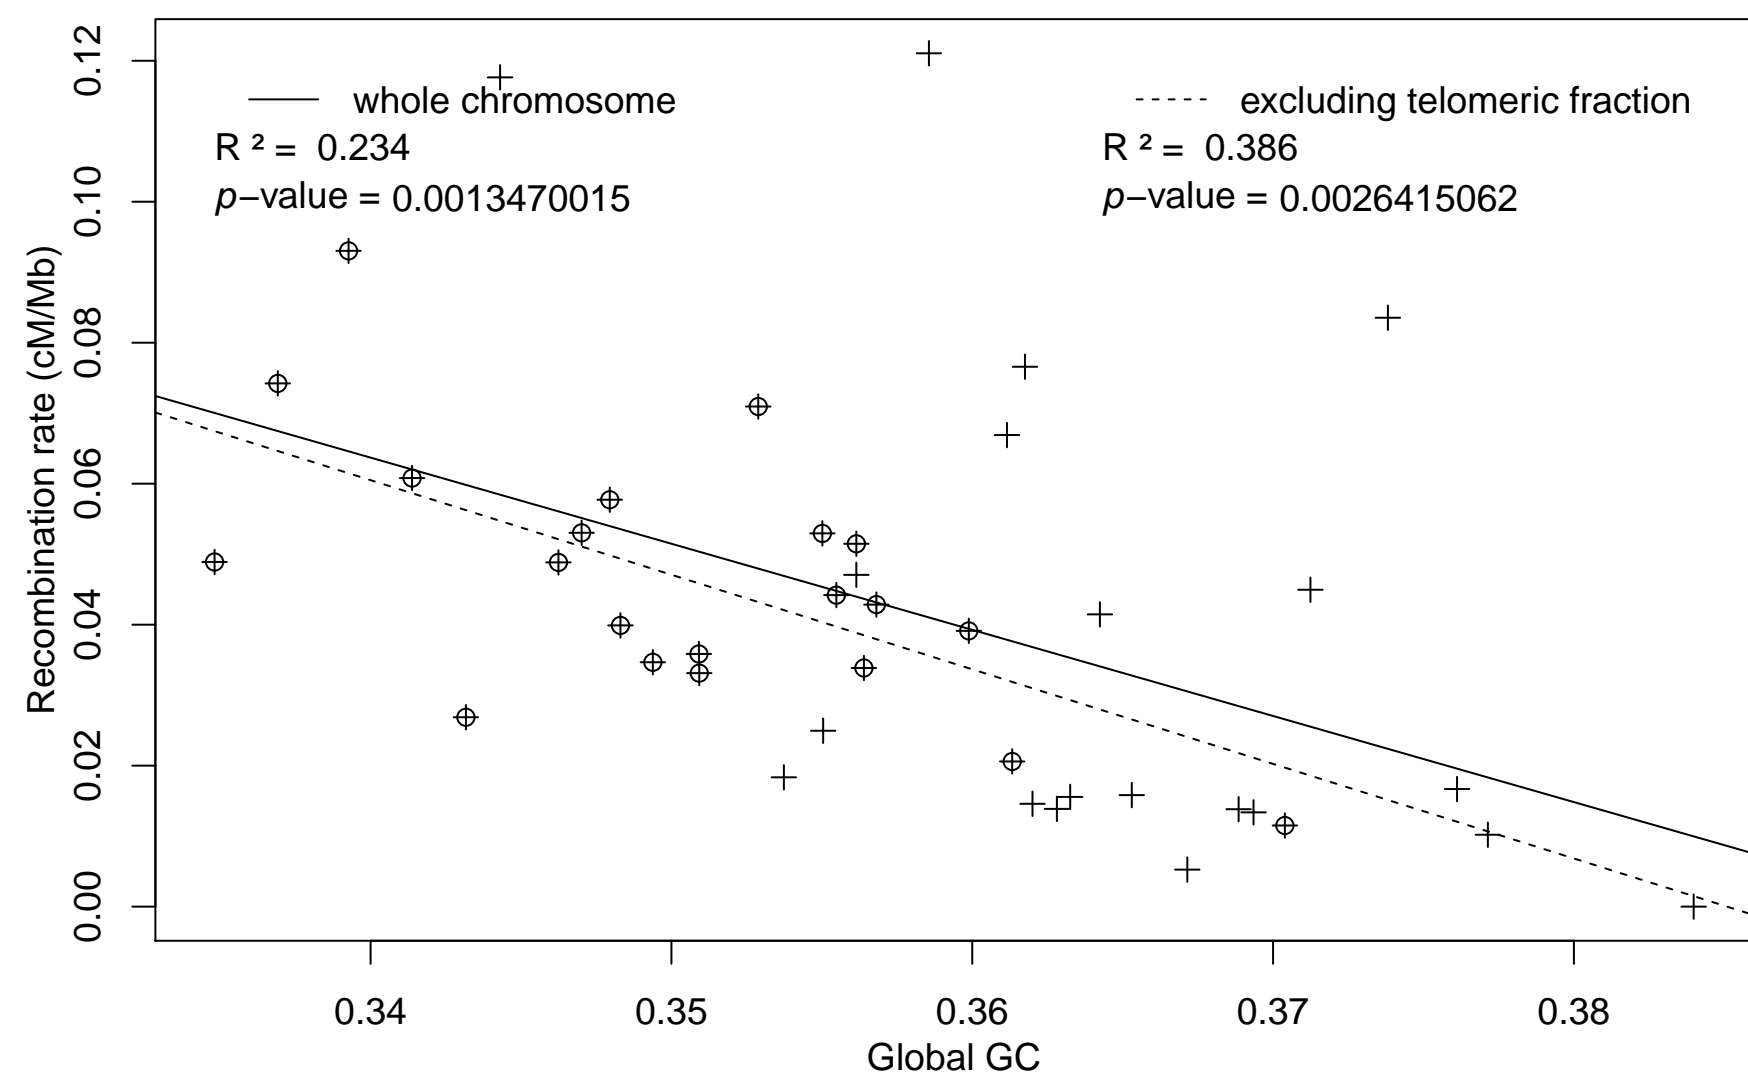

Male Chr 5 removing 50 % of total length VALUES Global GC

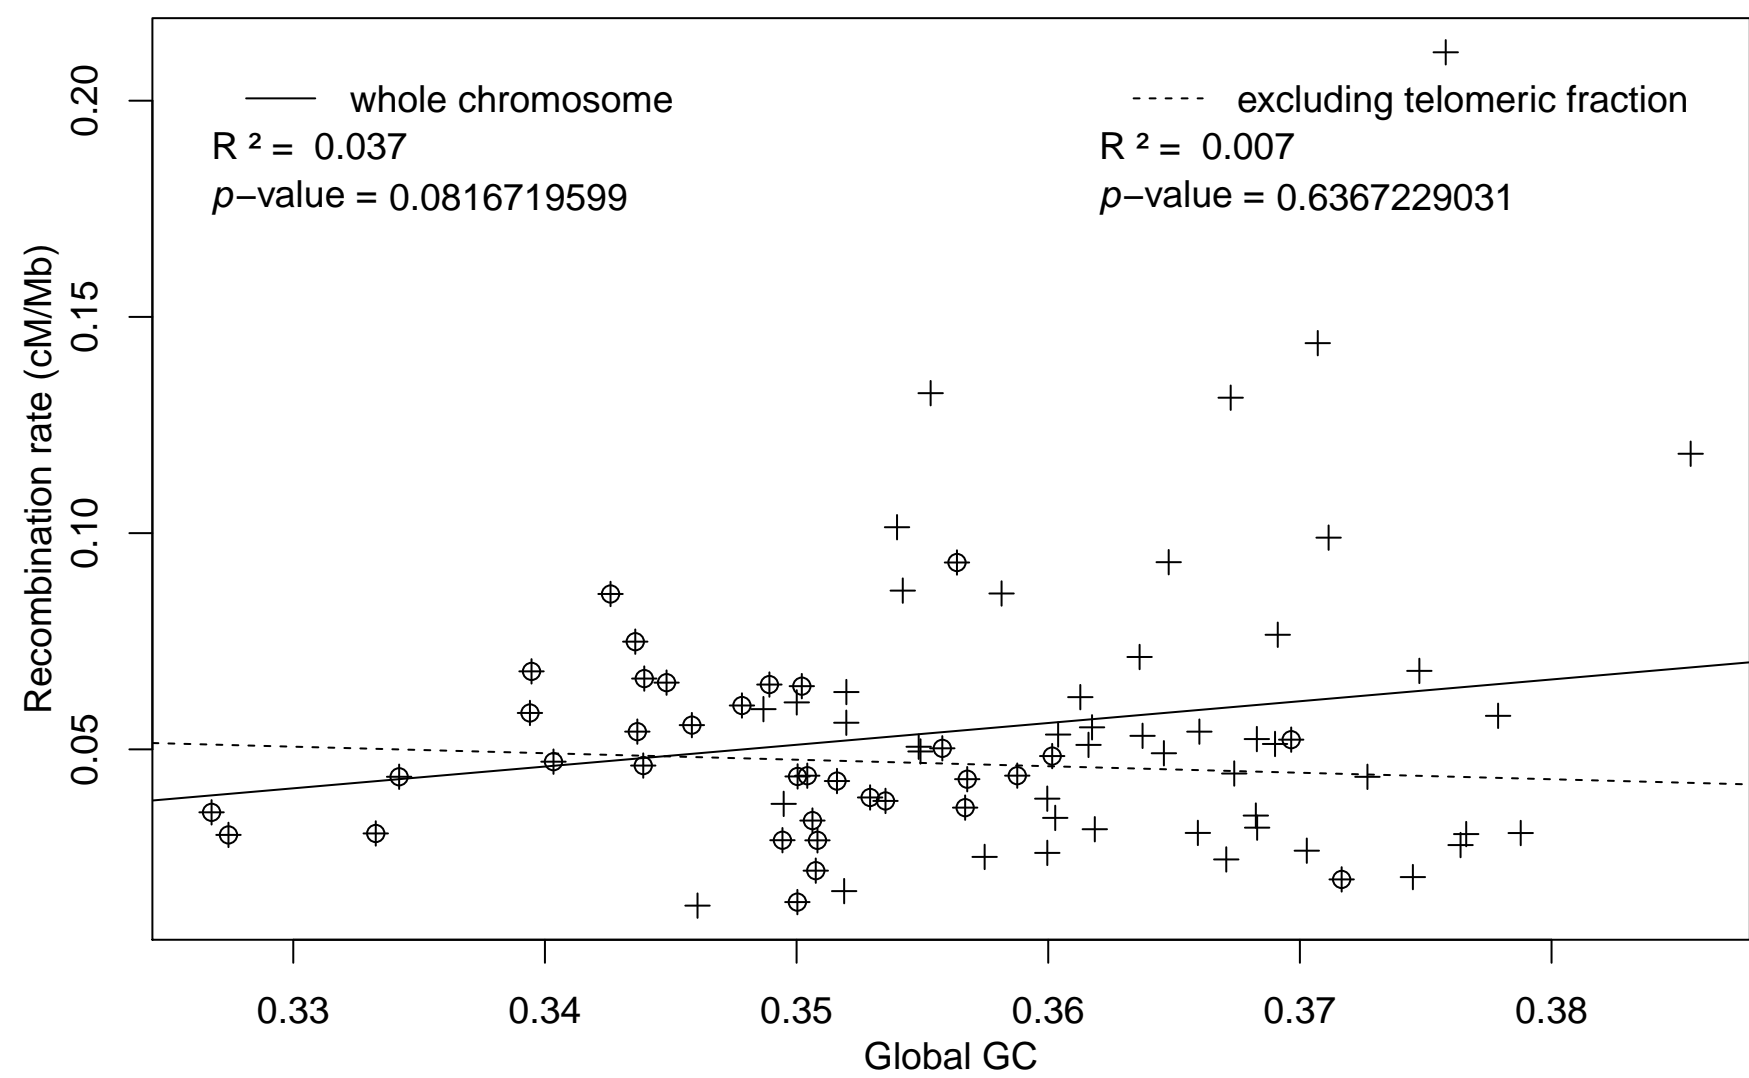

Female Chr 5 removing 50 % of total length VALUES Global GC

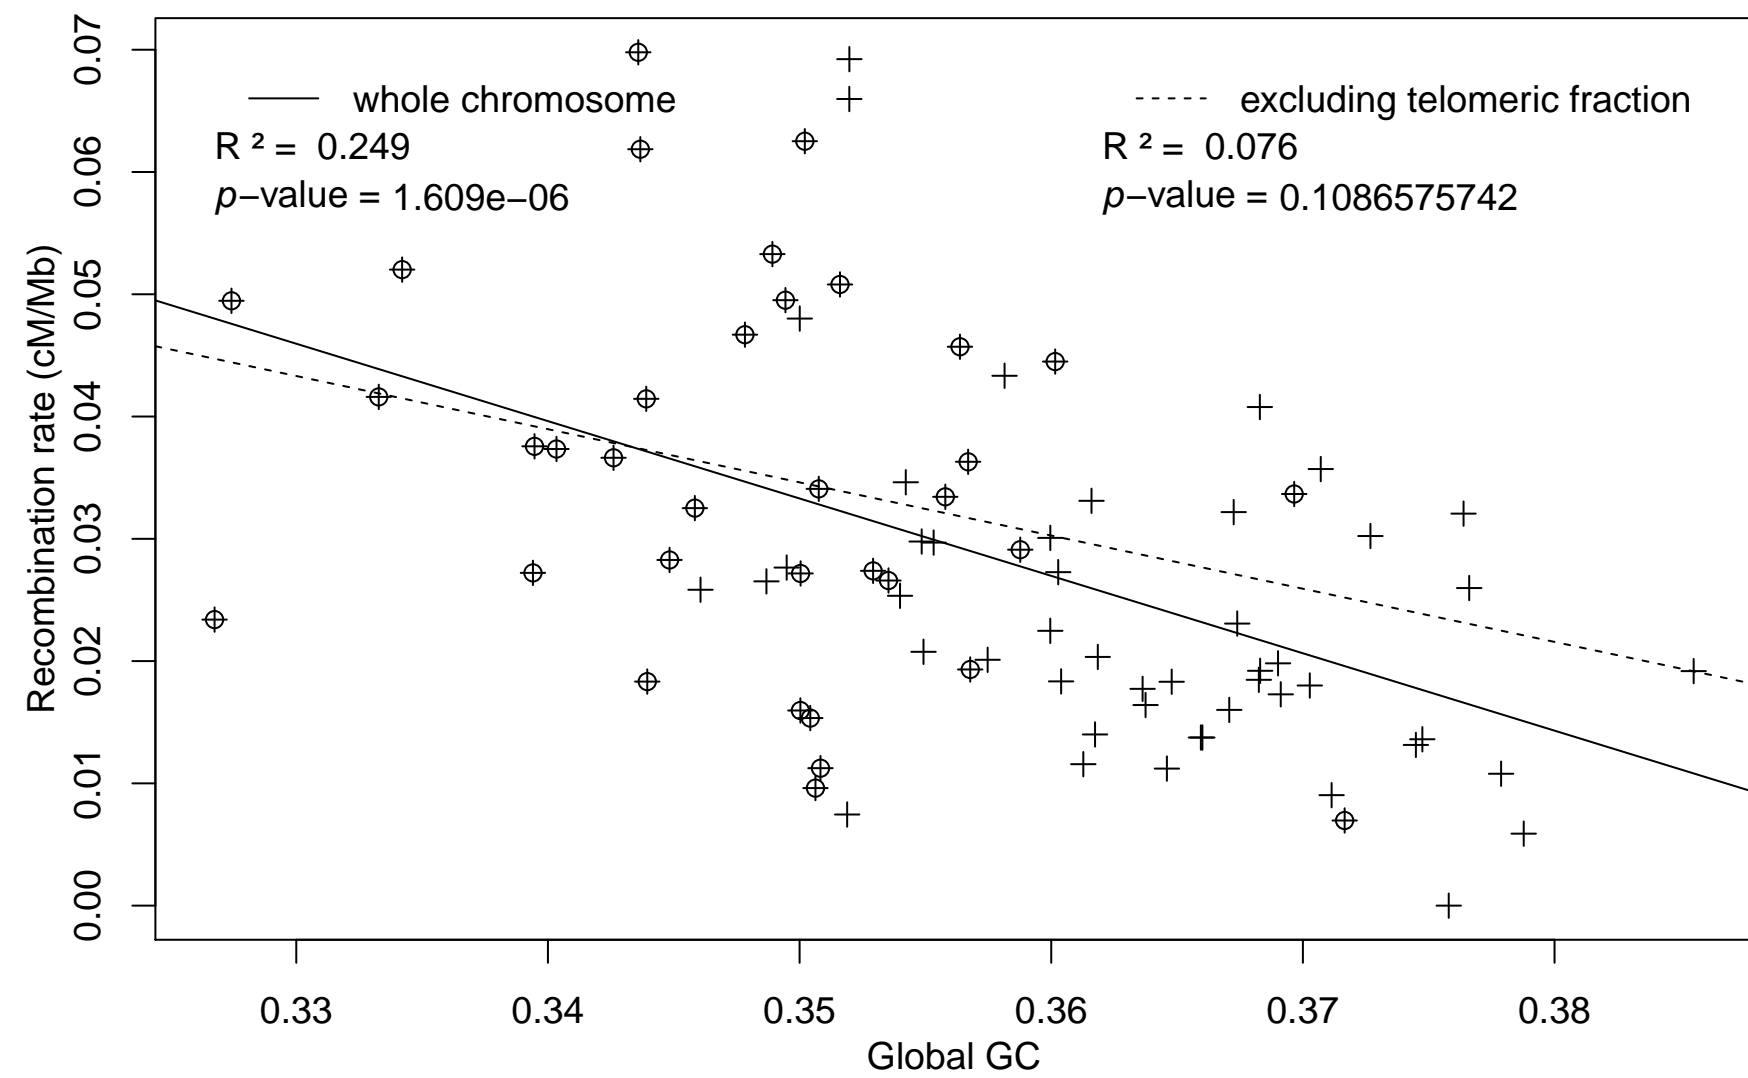

**Chromosome 1 CpG left arm**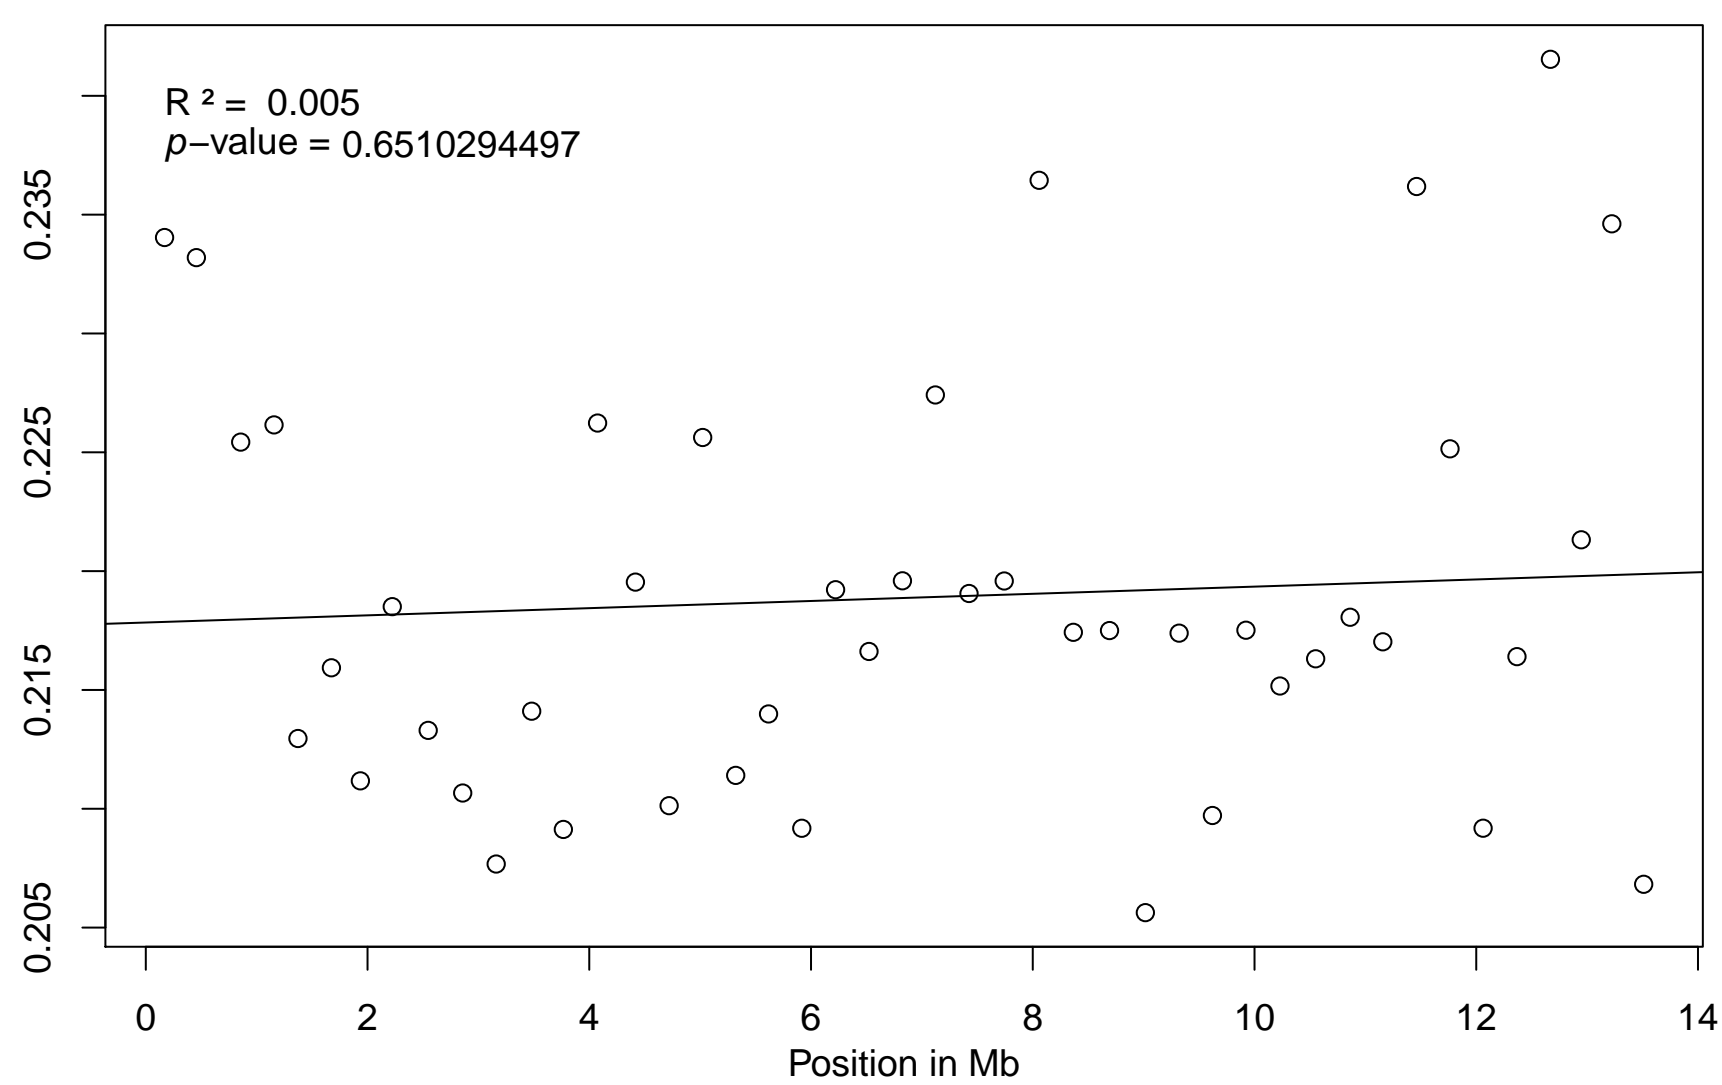**Chromosome 1 CpG right arm**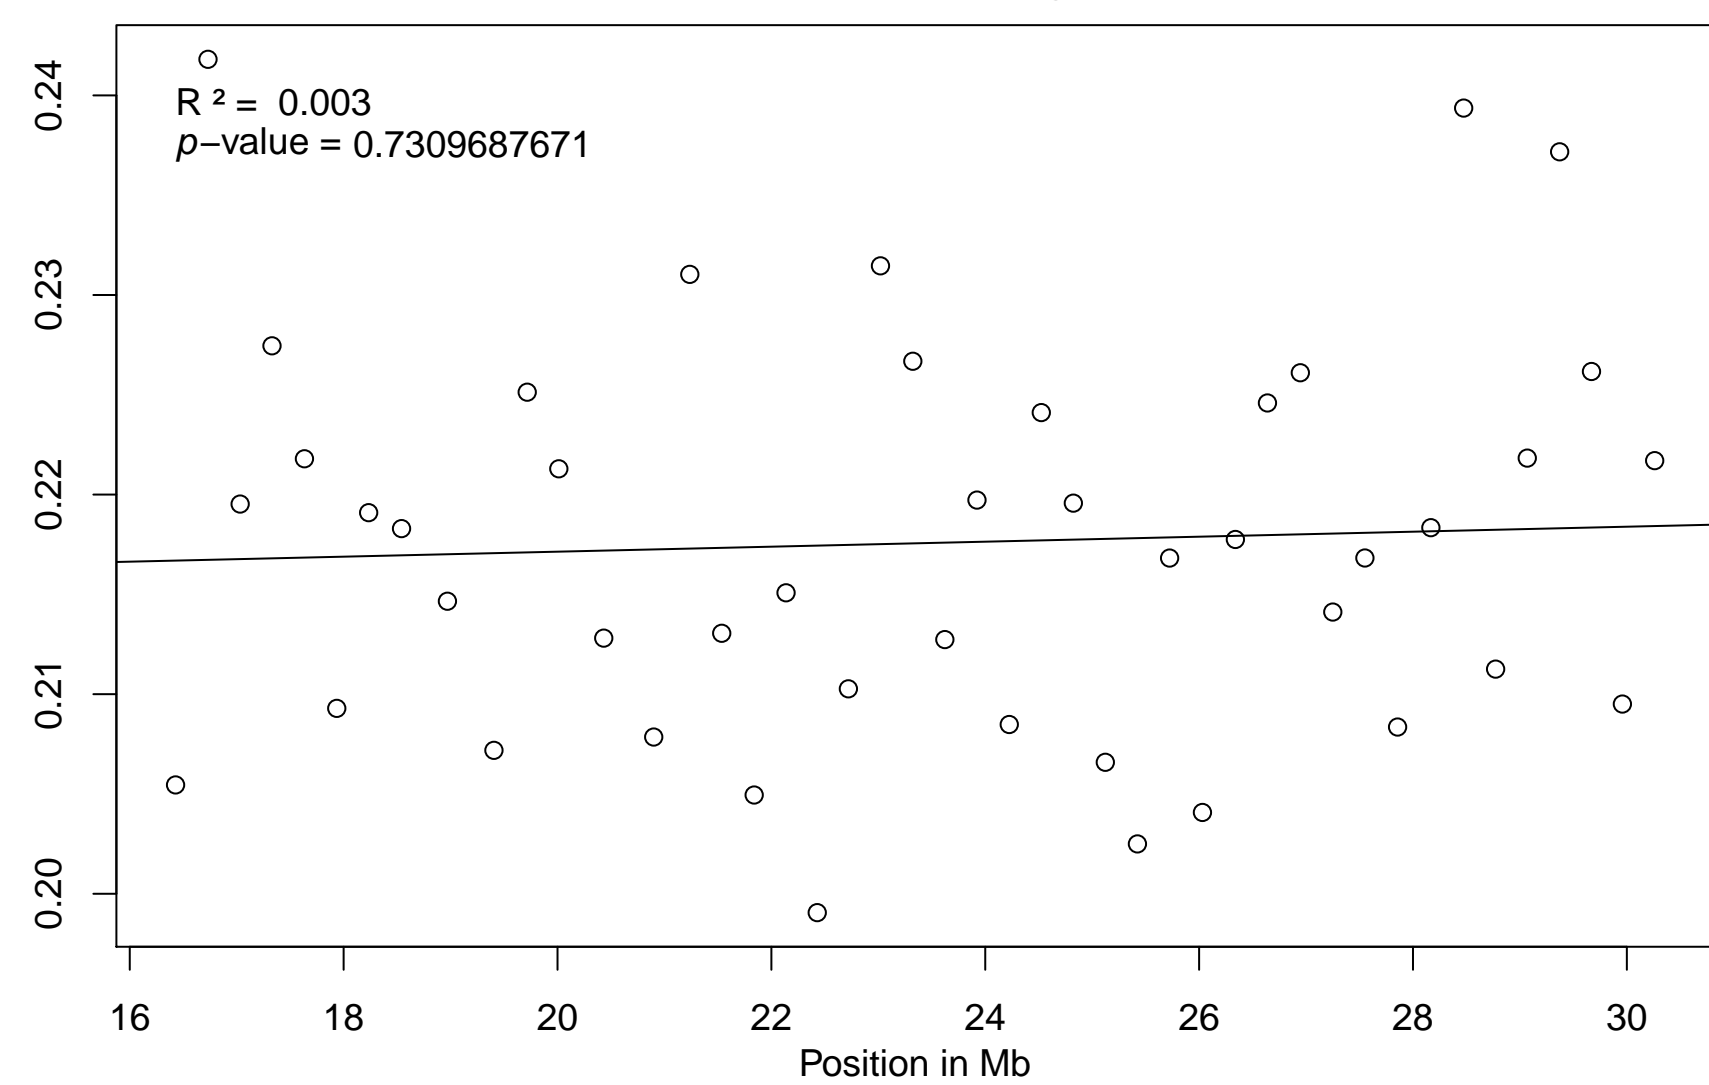**Chromosome 2 CpG left arm**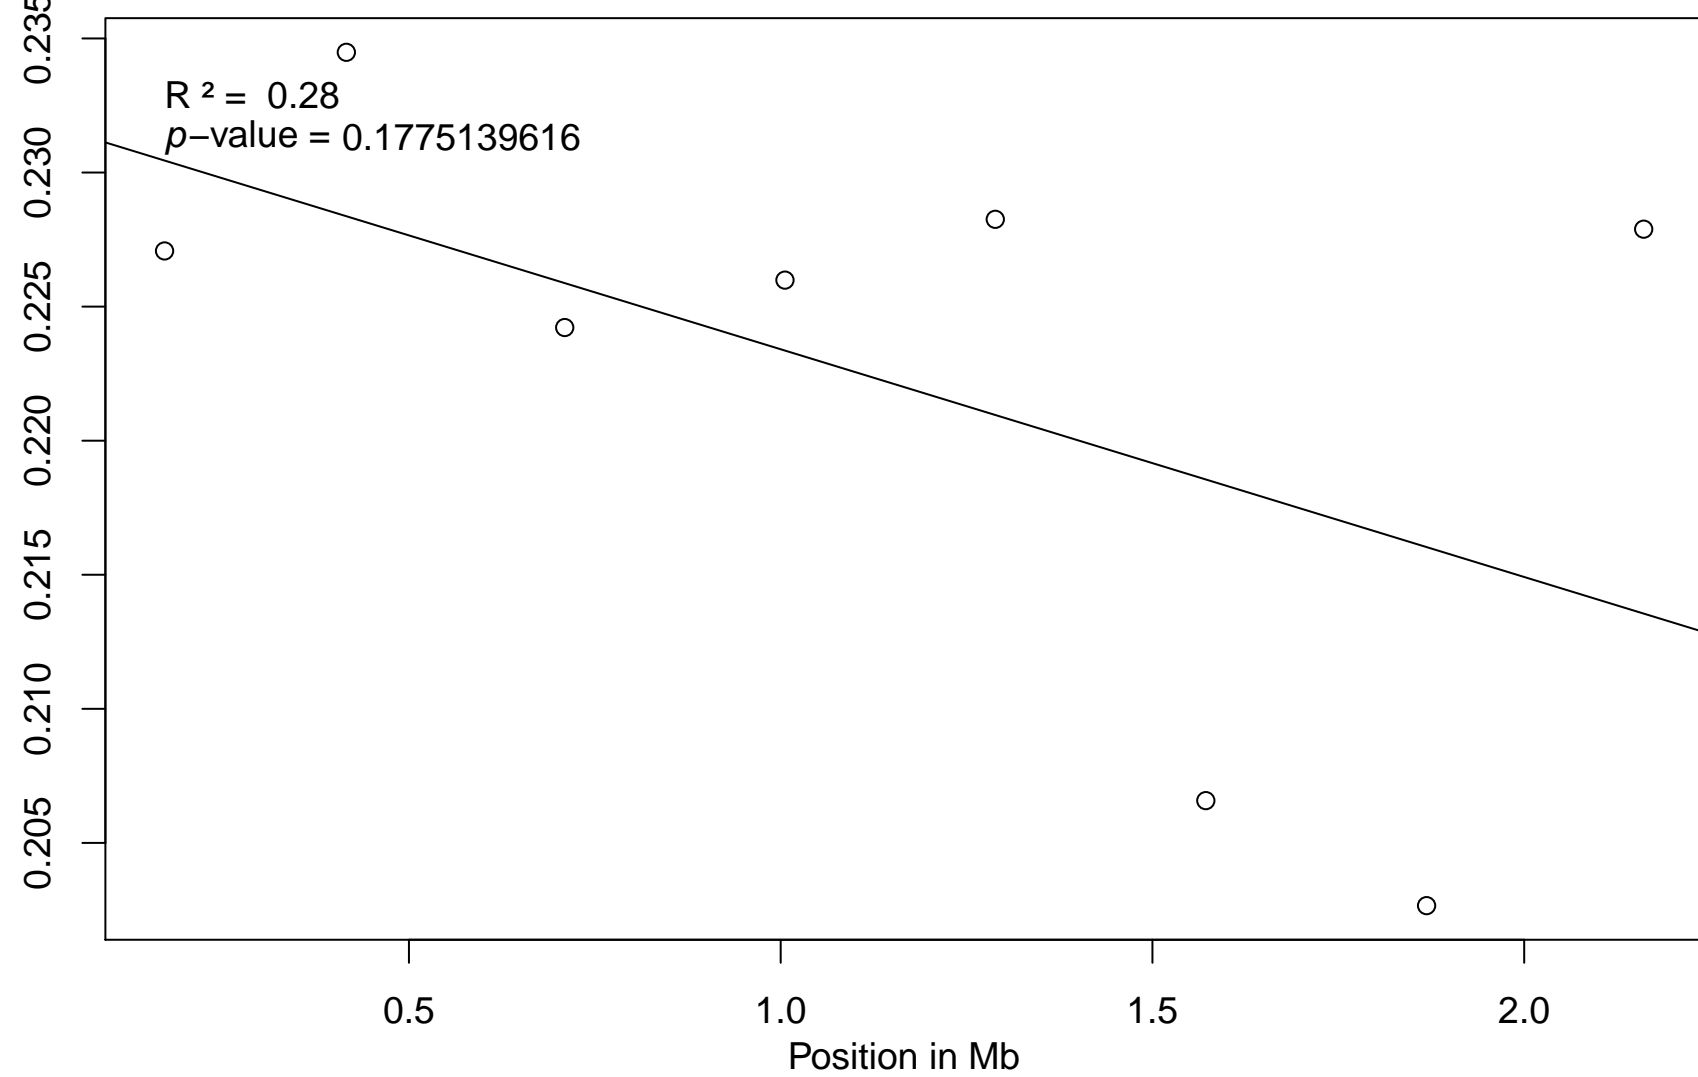**Chromosome 2 CpG right arm**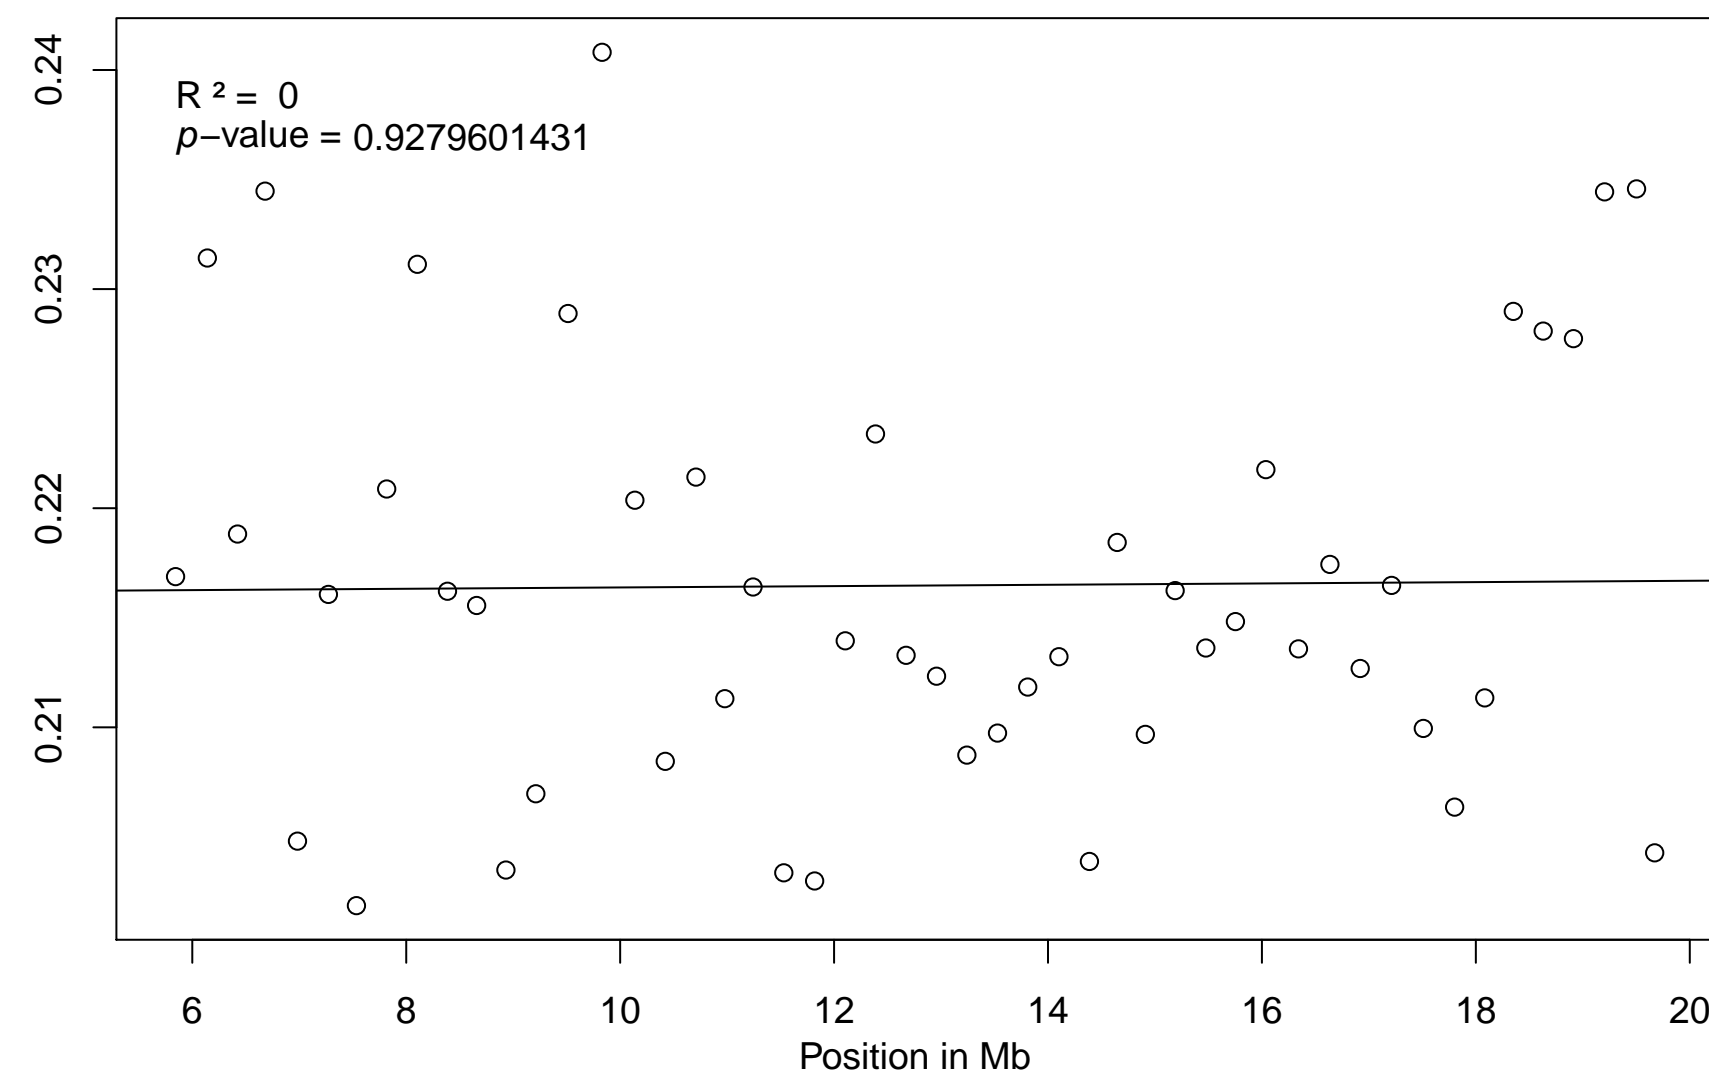**Chromosome 3 CpG left arm**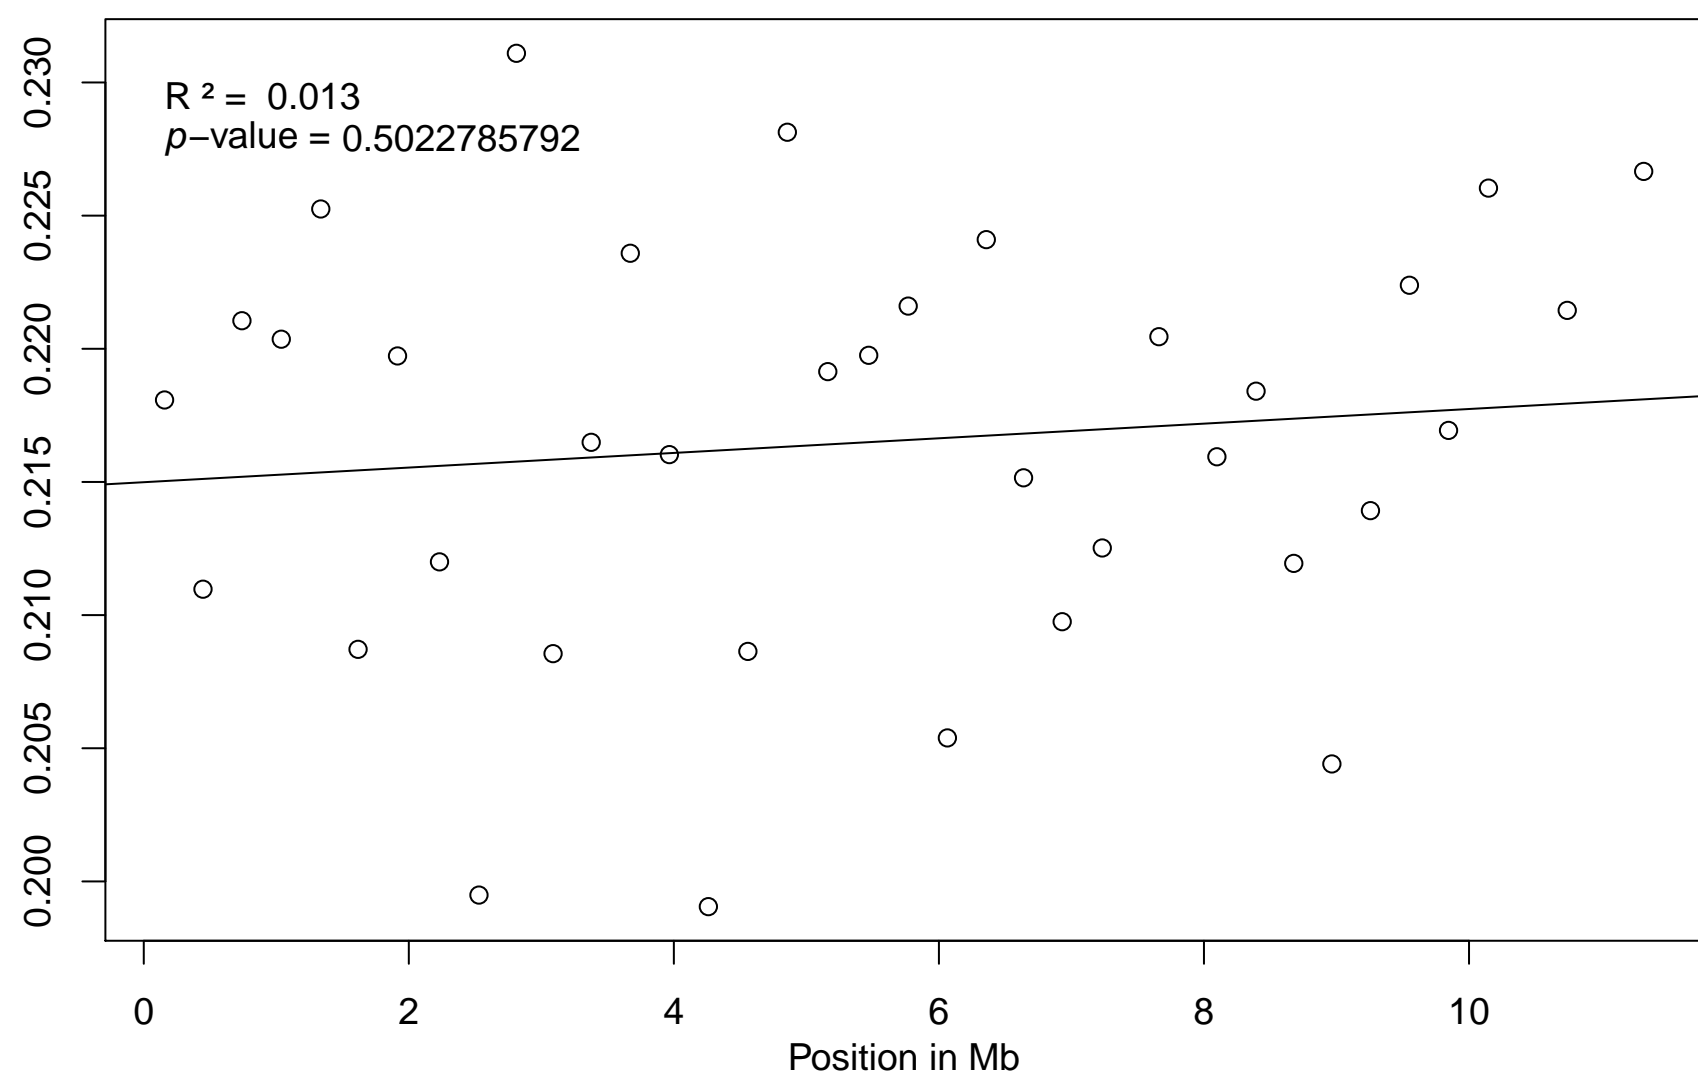**Chromosome 3 CpG right arm**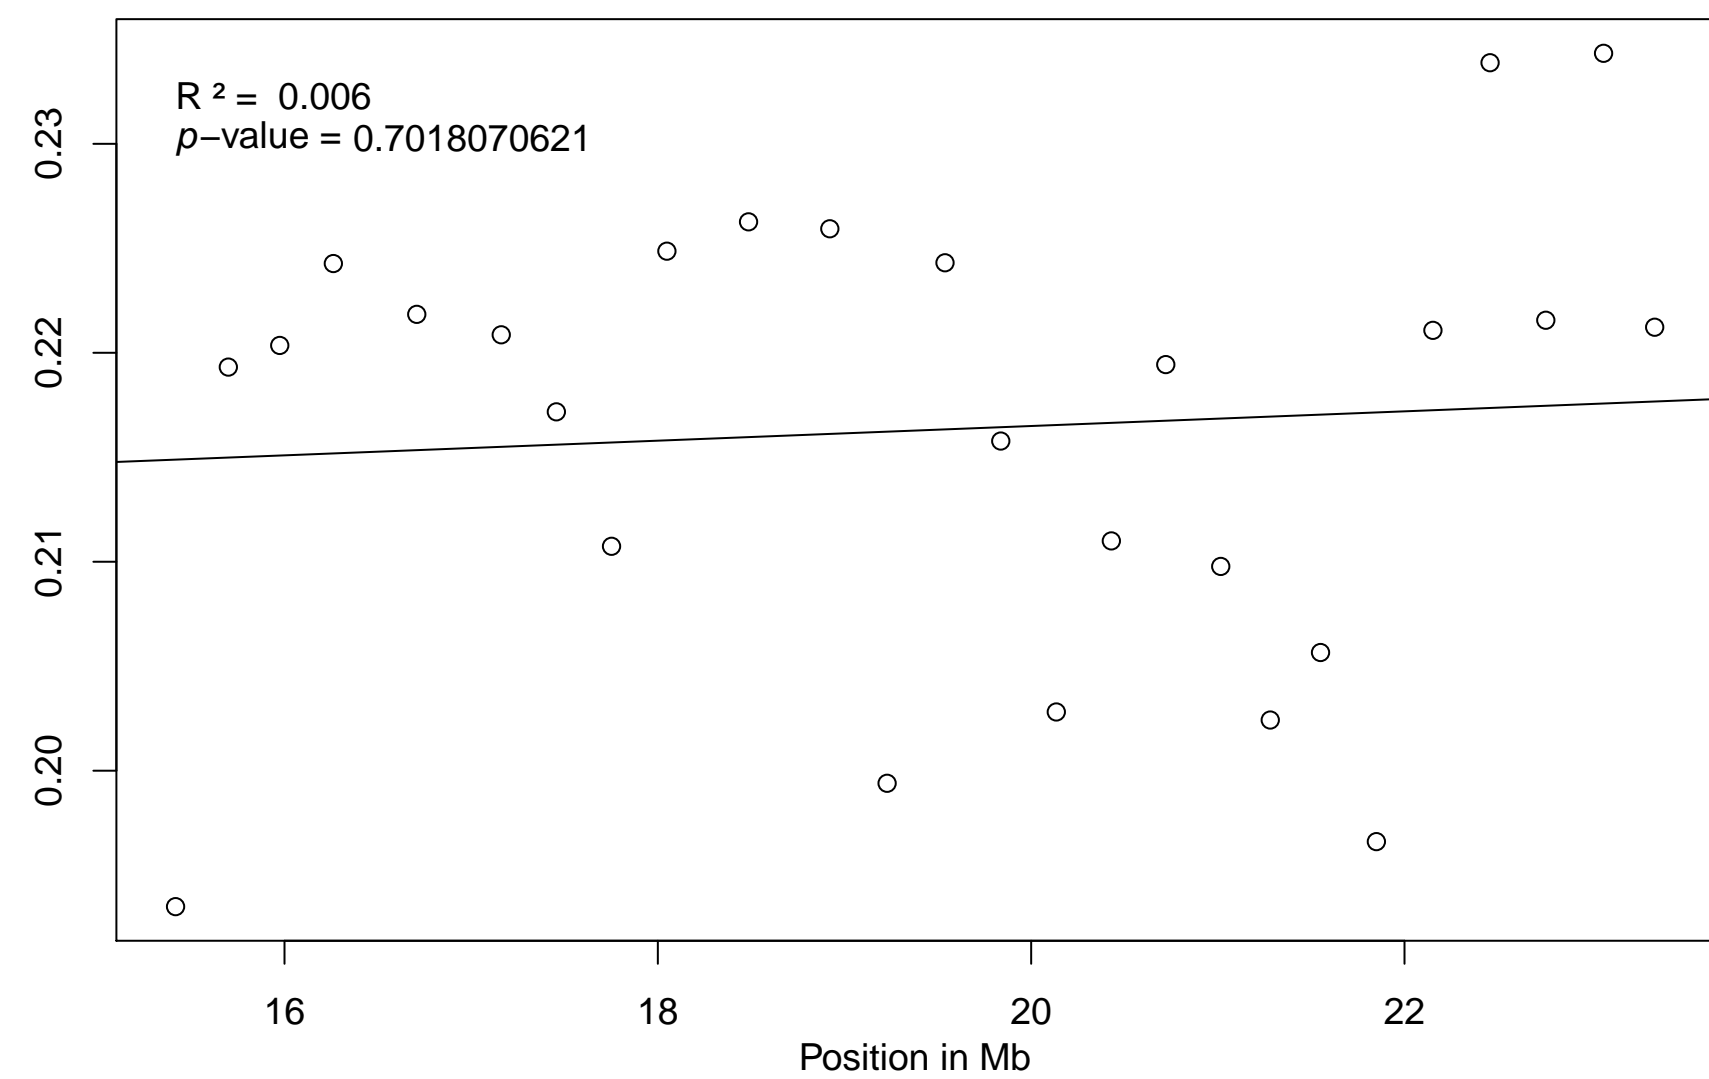**Chromosome 4 CpG left arm**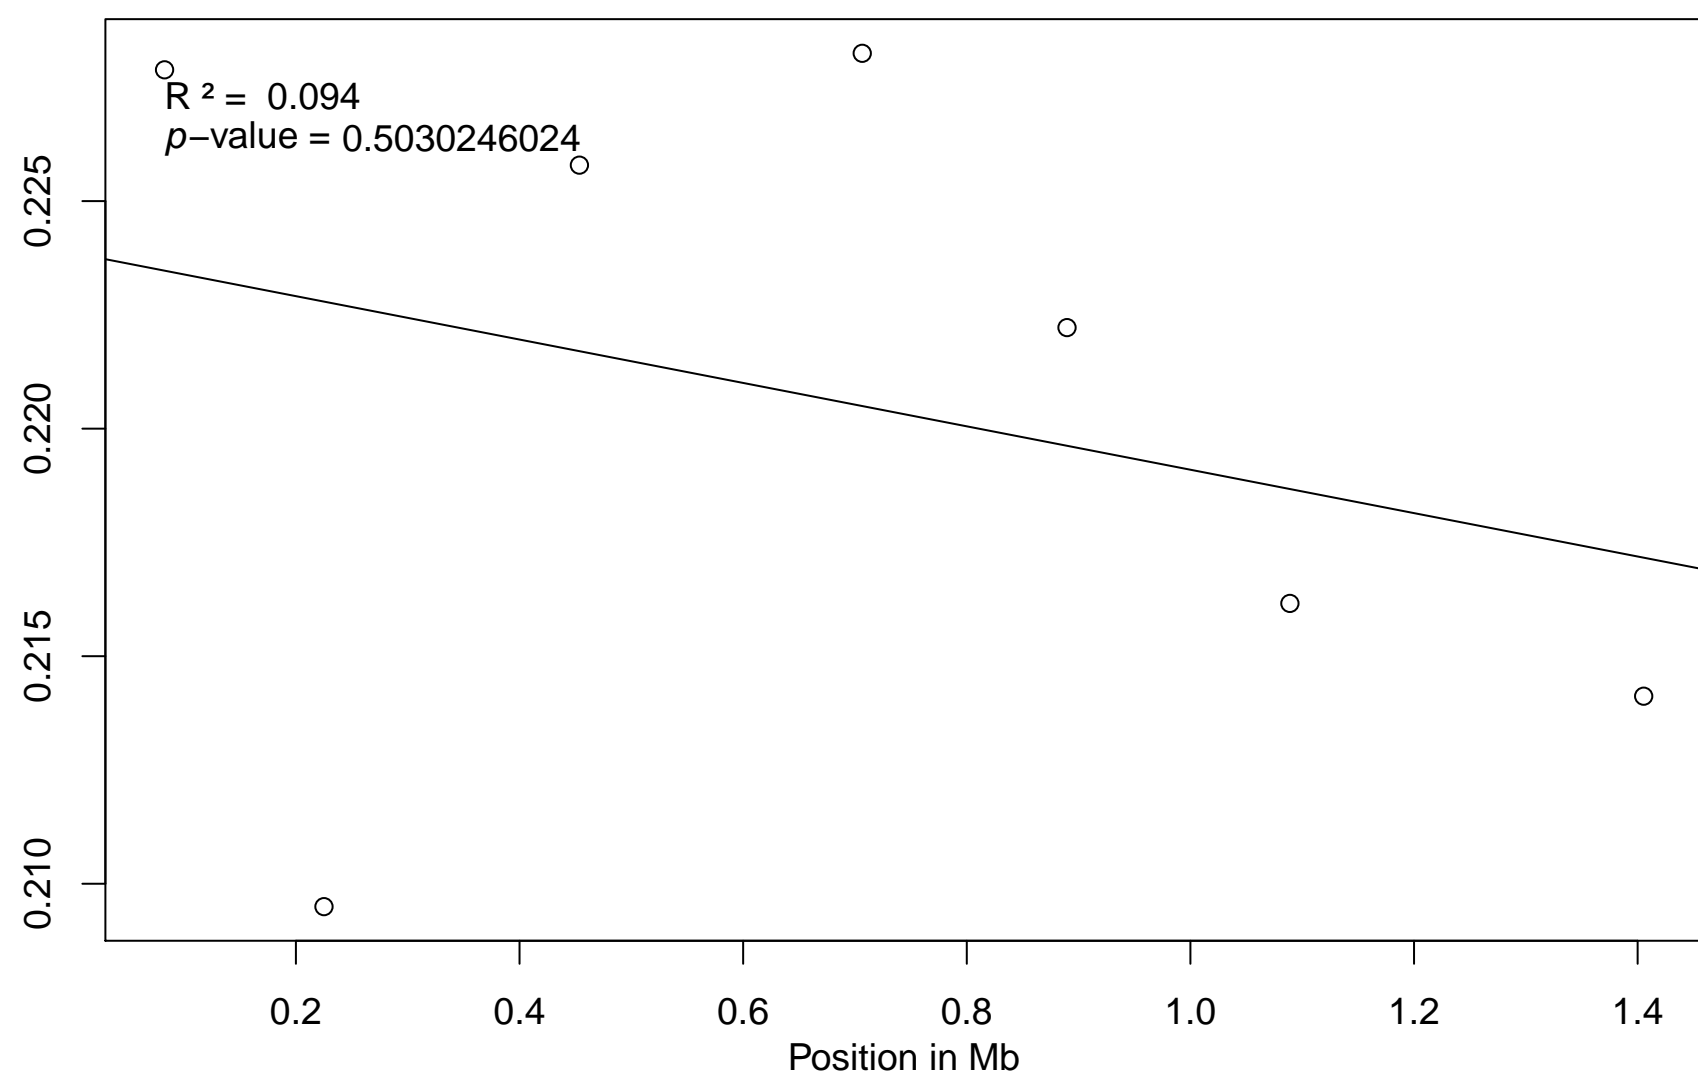**Chromosome 4 CpG right arm**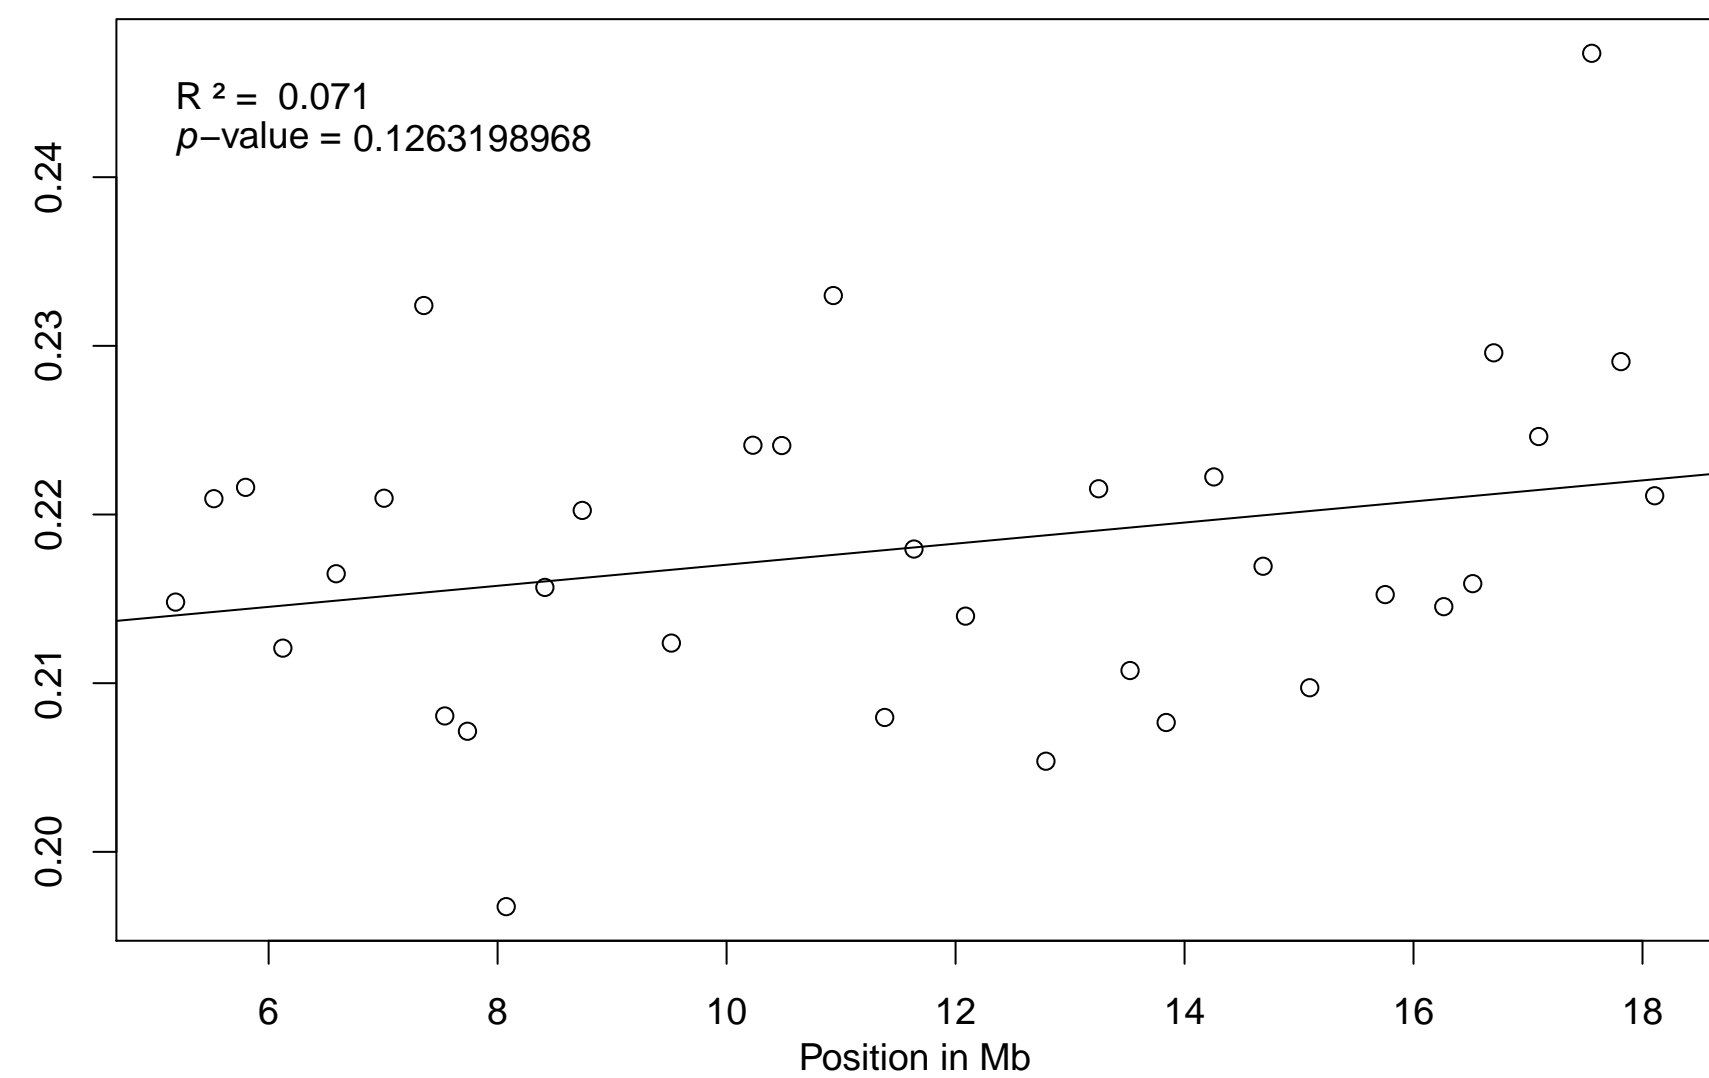**Chromosome 5 CpG left arm**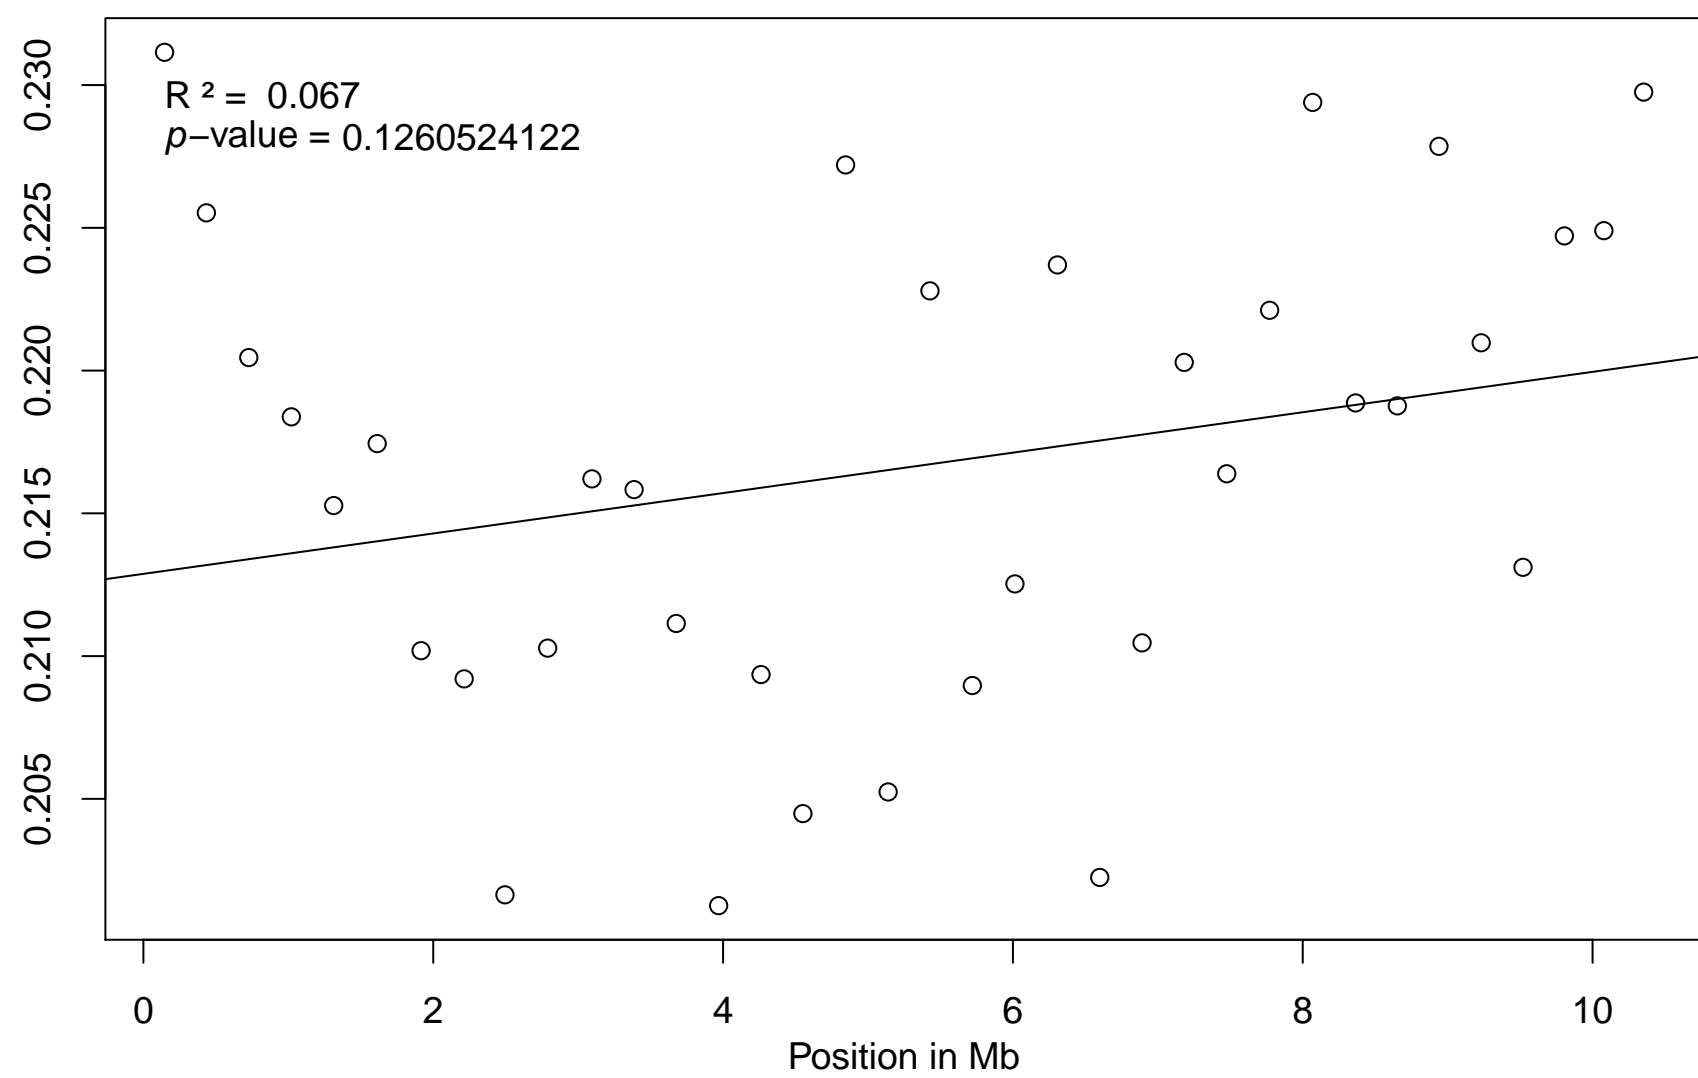**Chromosome 5 CpG right arm**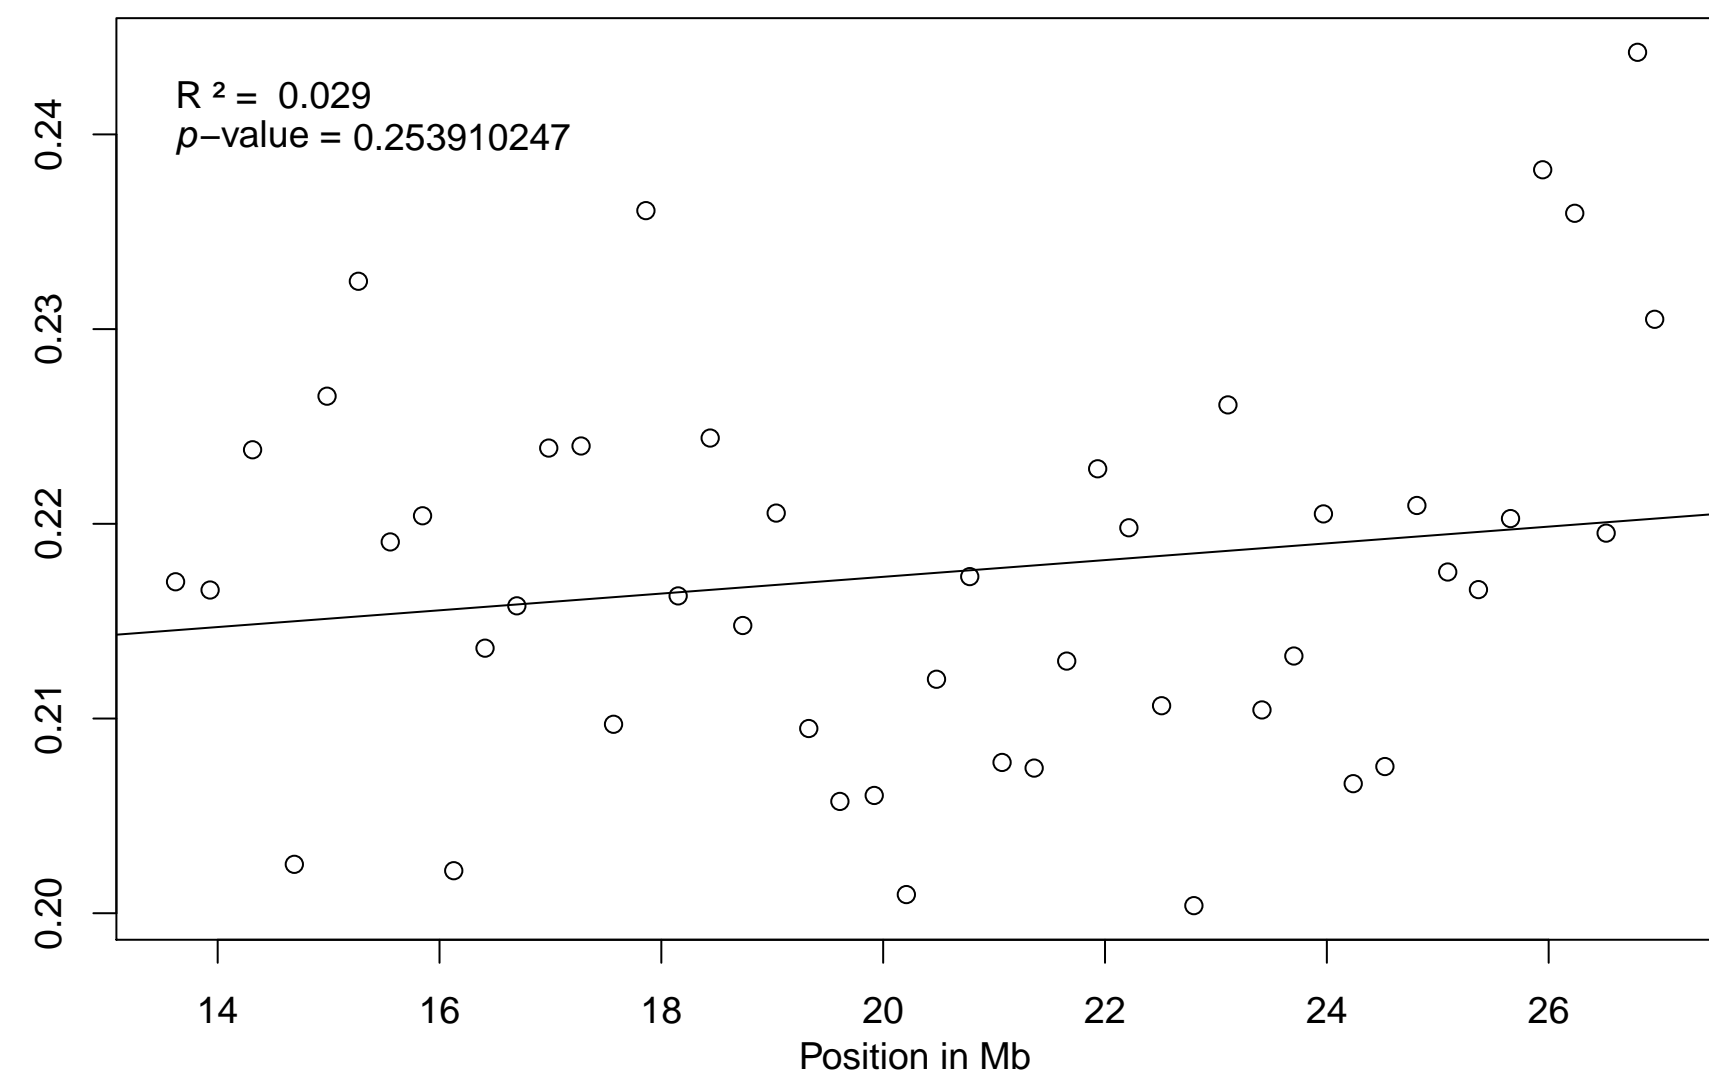

**Male Chr 1 removing 30 % of total length VALUES CpG**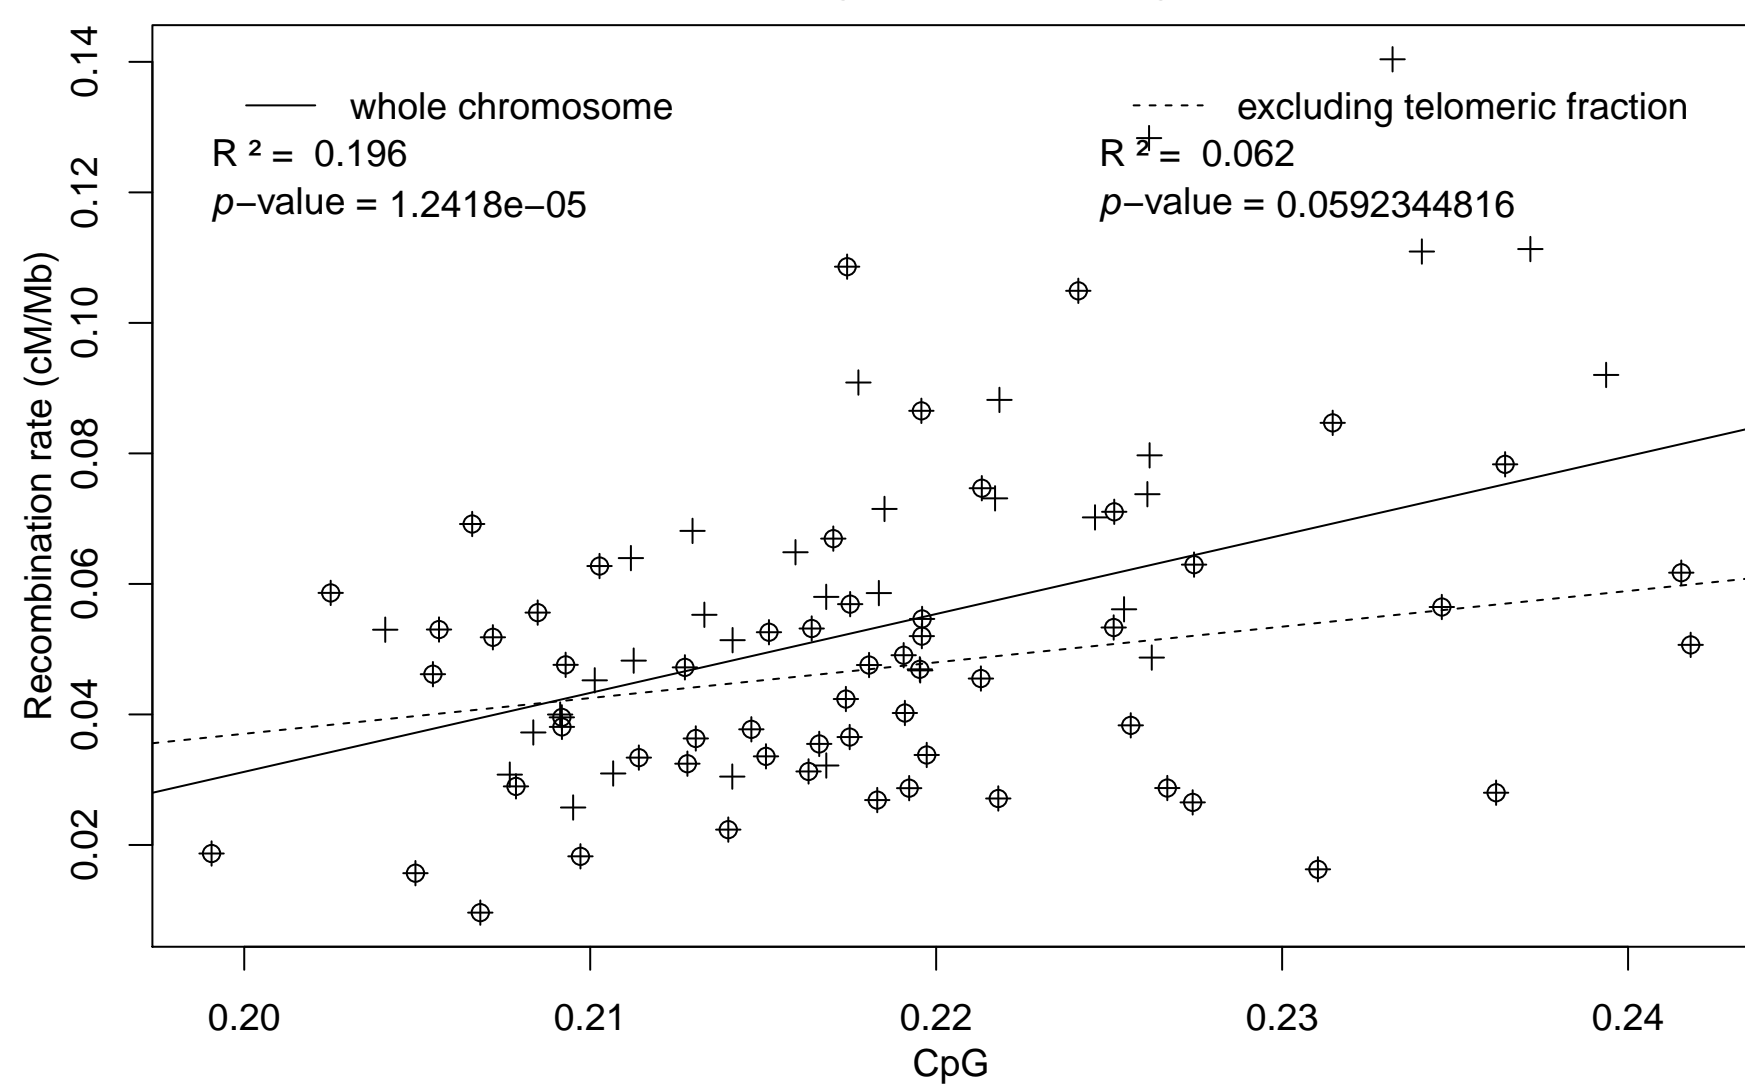**Female Chr 1 removing 30 % of total length VALUES CpG**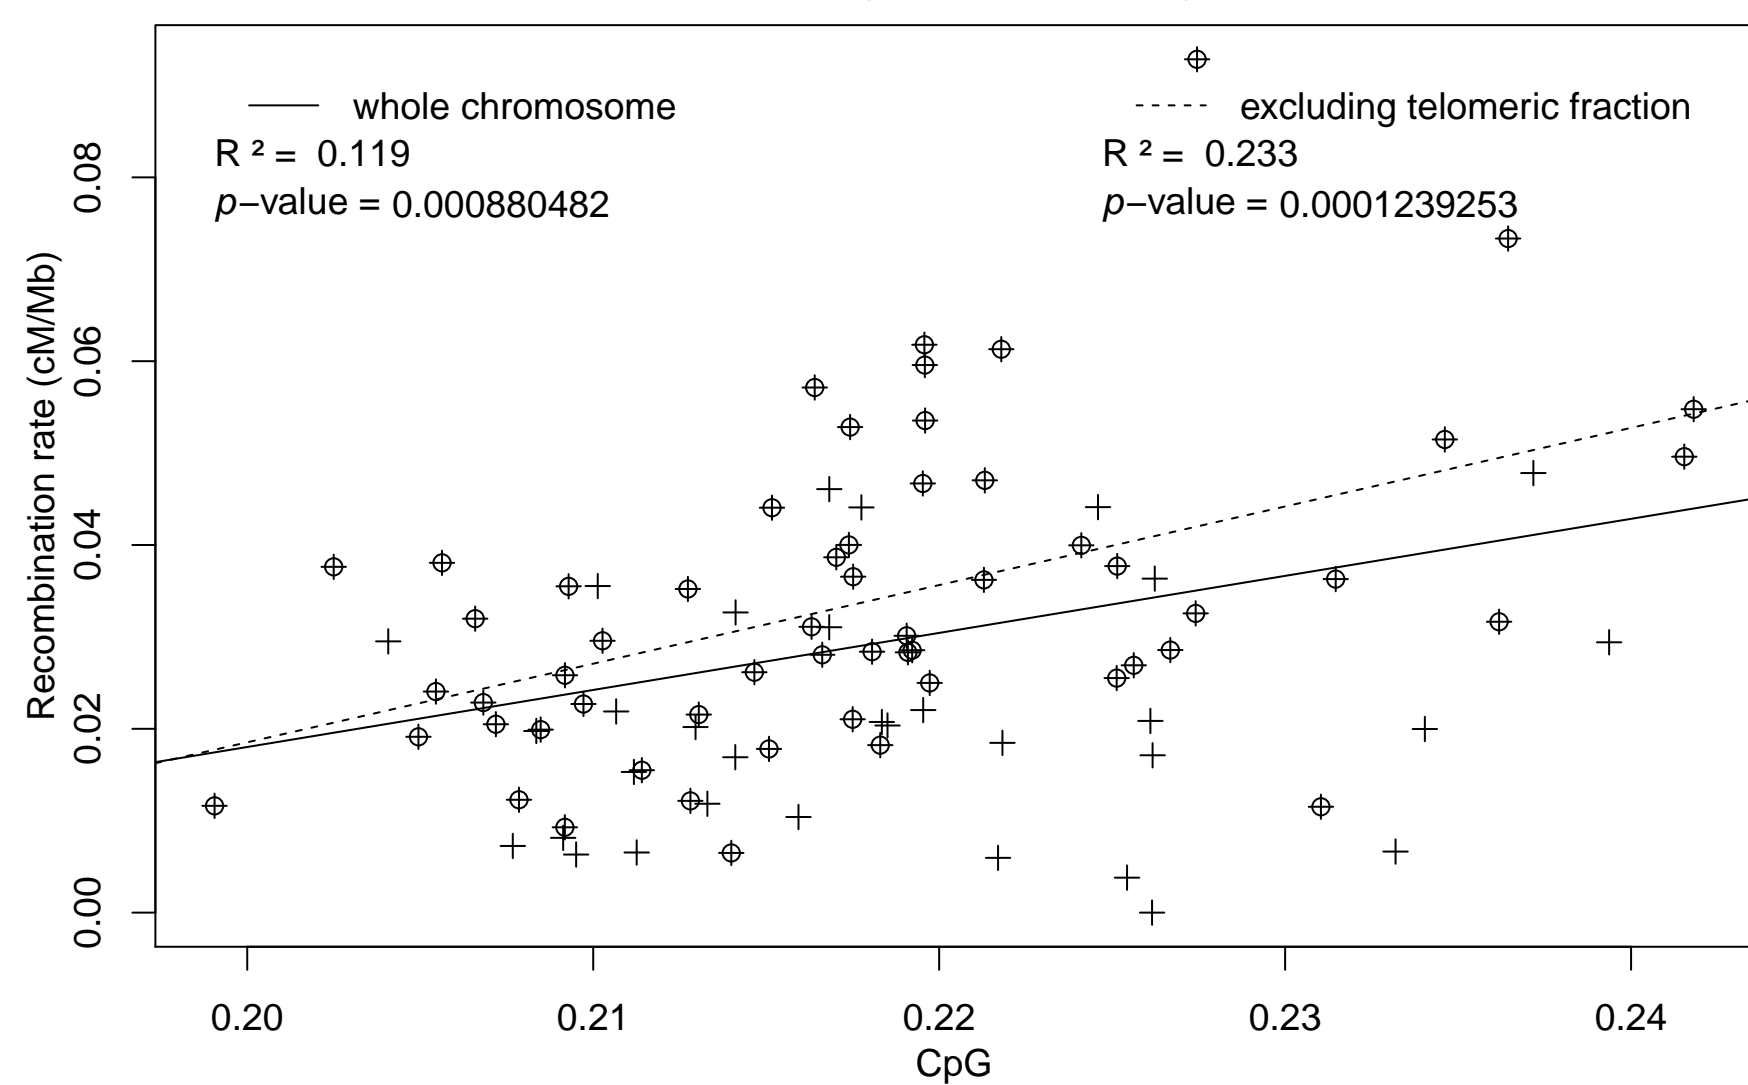**Male Chr 2 removing 30 % of total length VALUES CpG**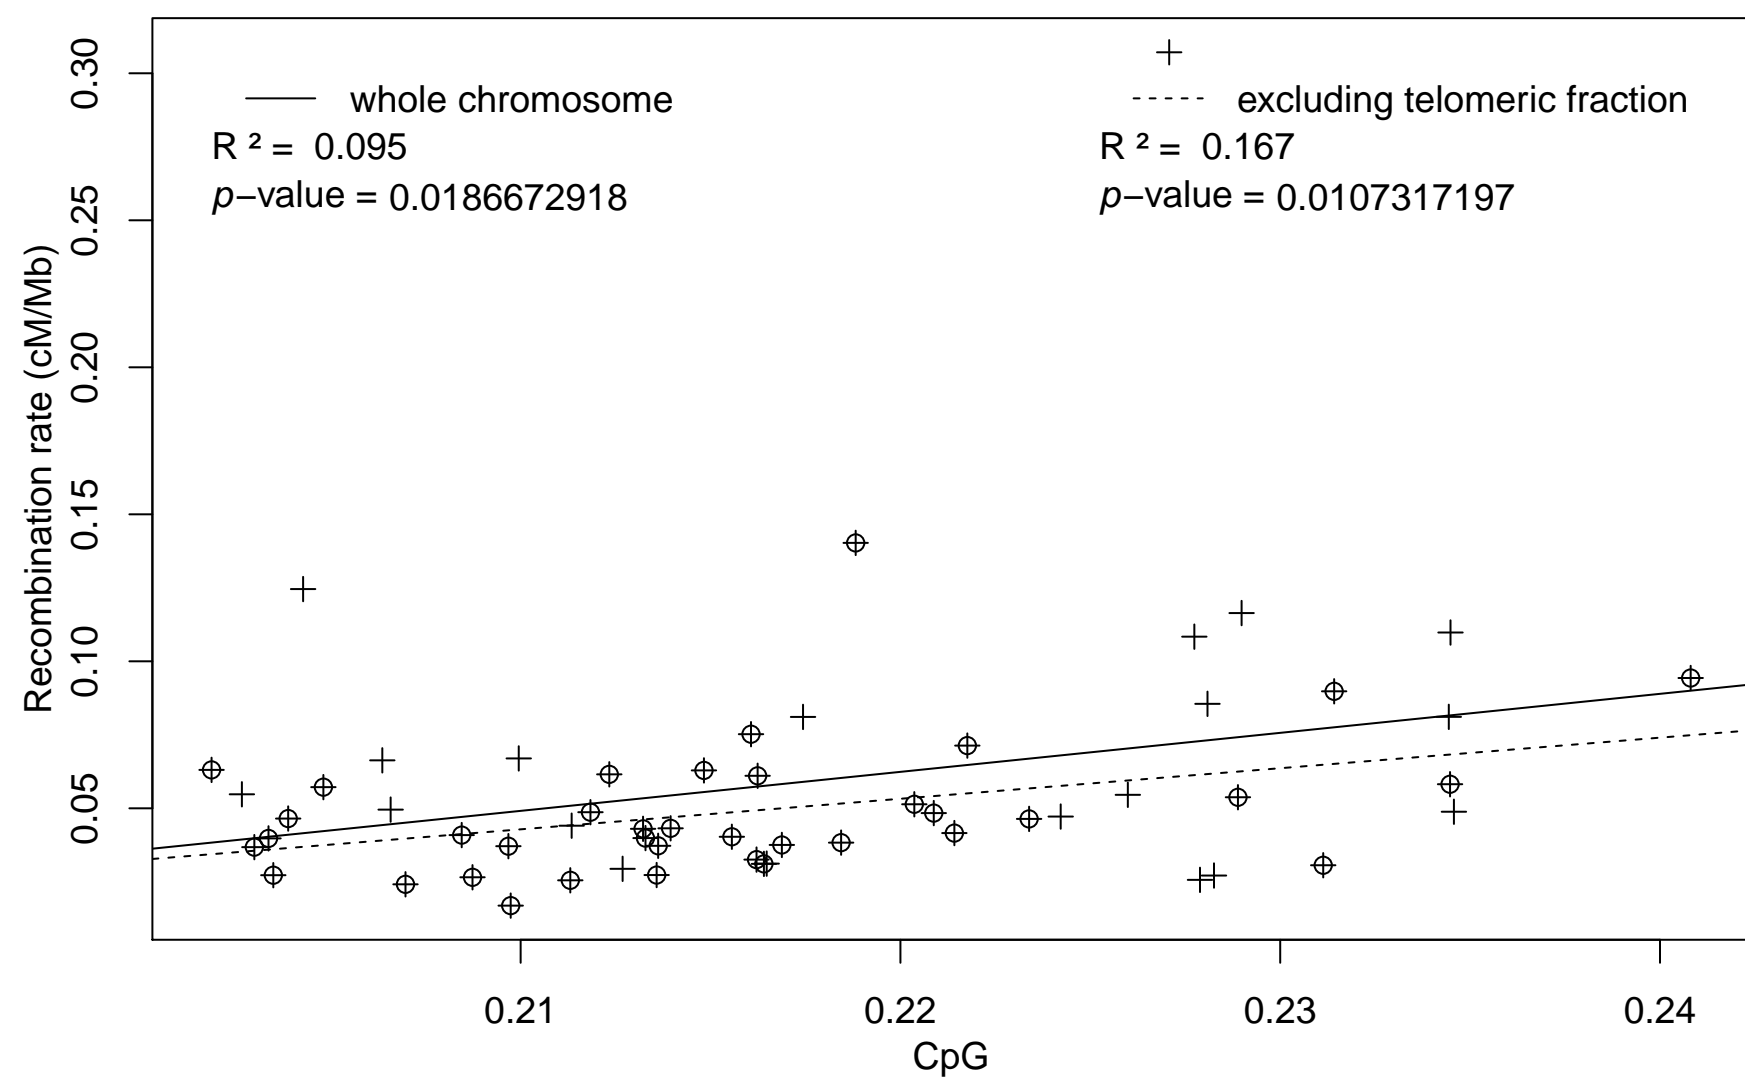**Female Chr 2 removing 30 % of total length VALUES CpG**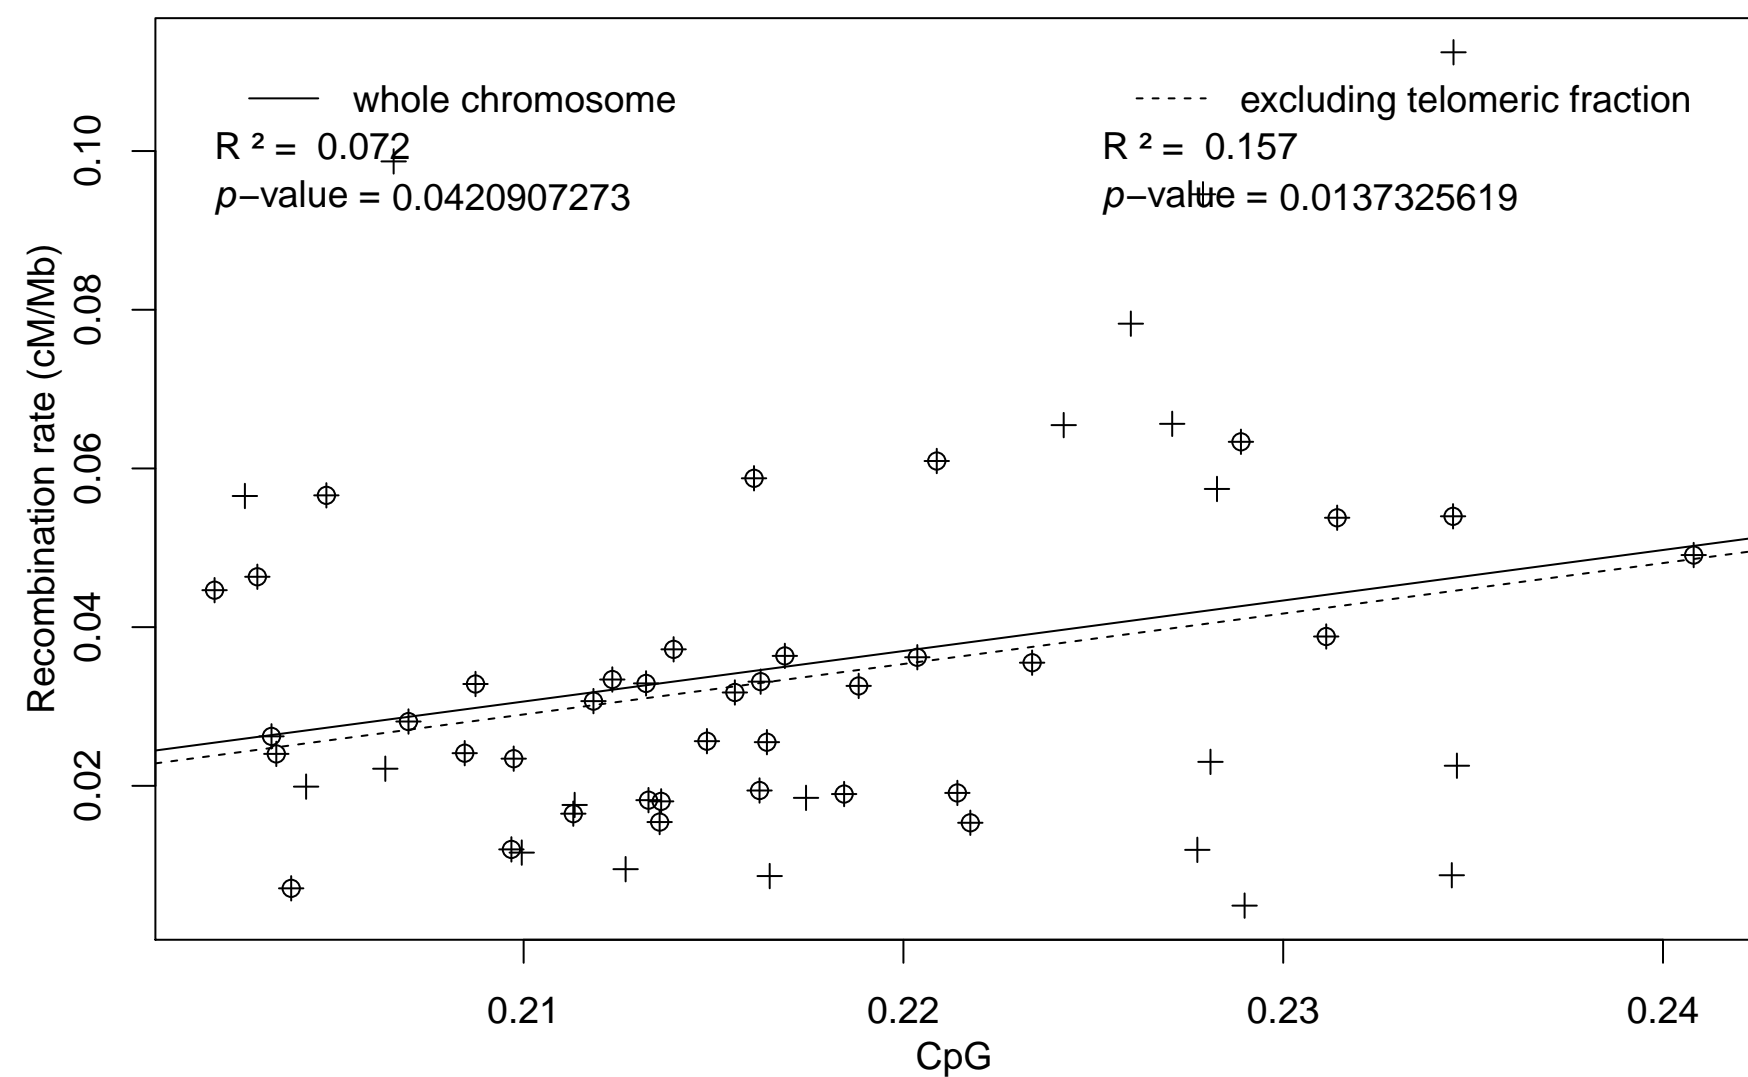**Male Chr 3 removing 30 % of total length VALUES CpG**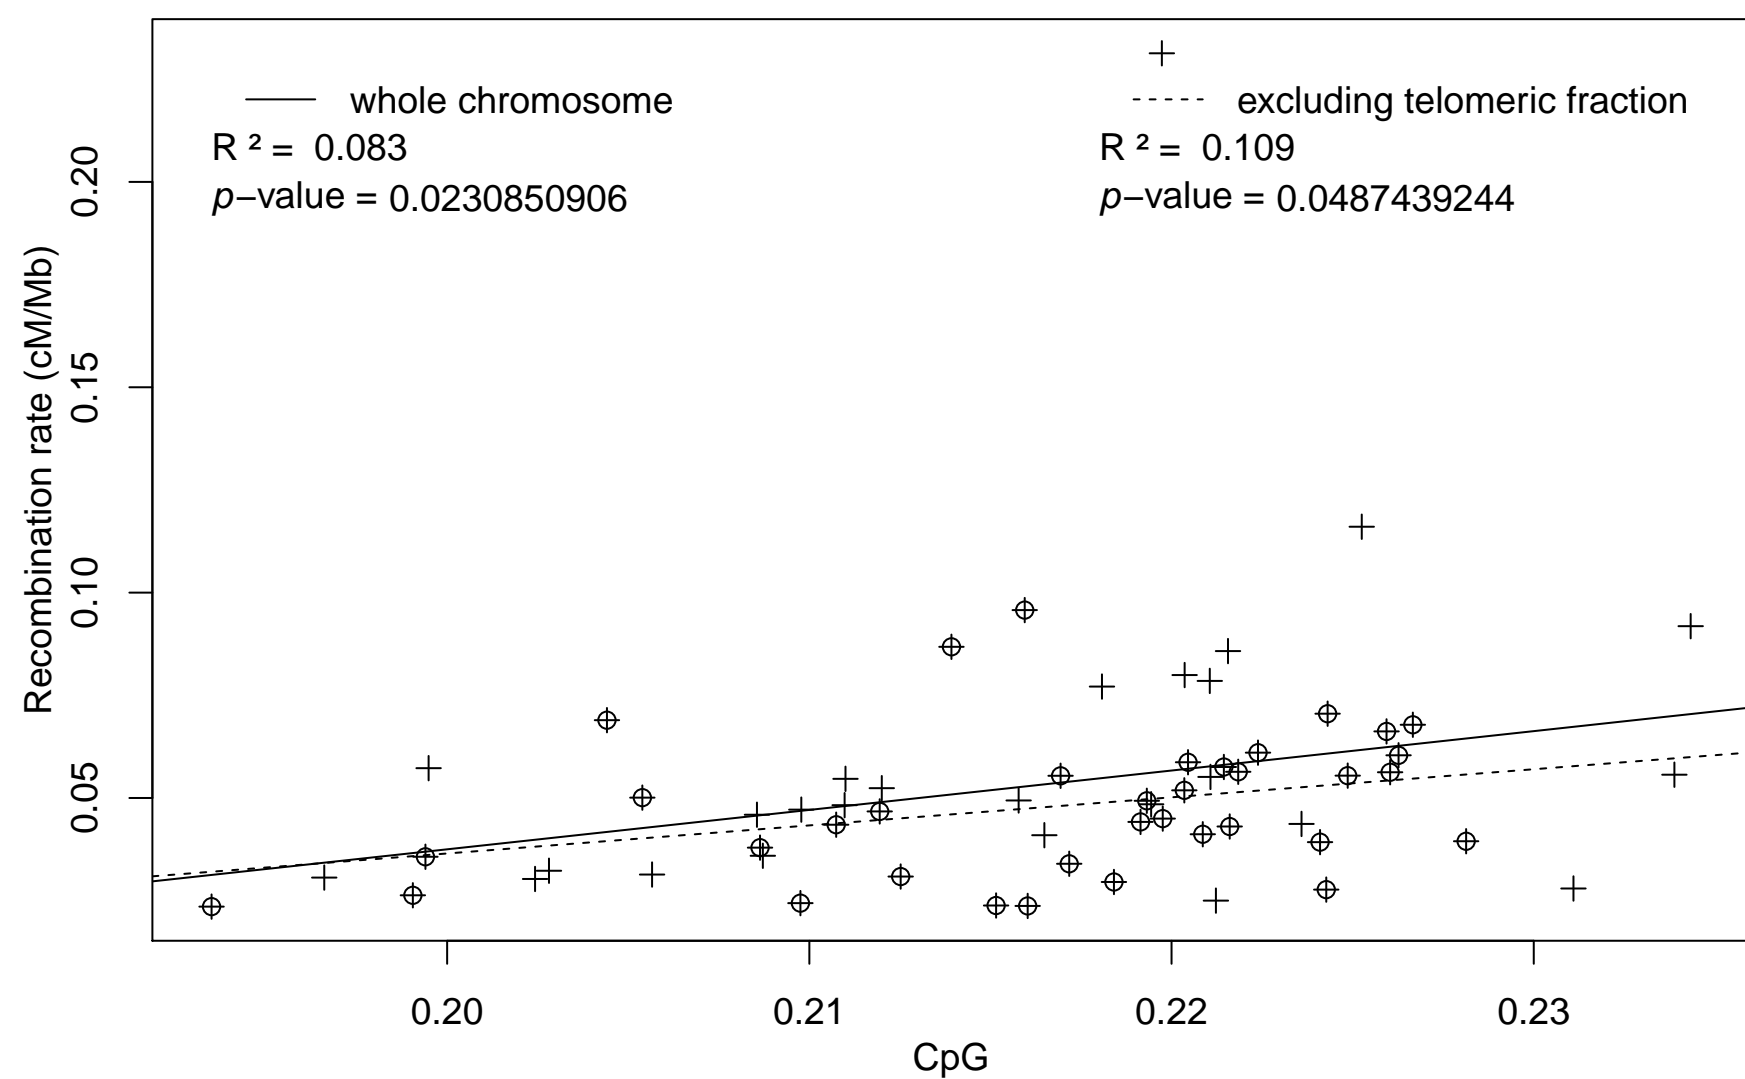**Female Chr 3 removing 30 % of total length VALUES CpG**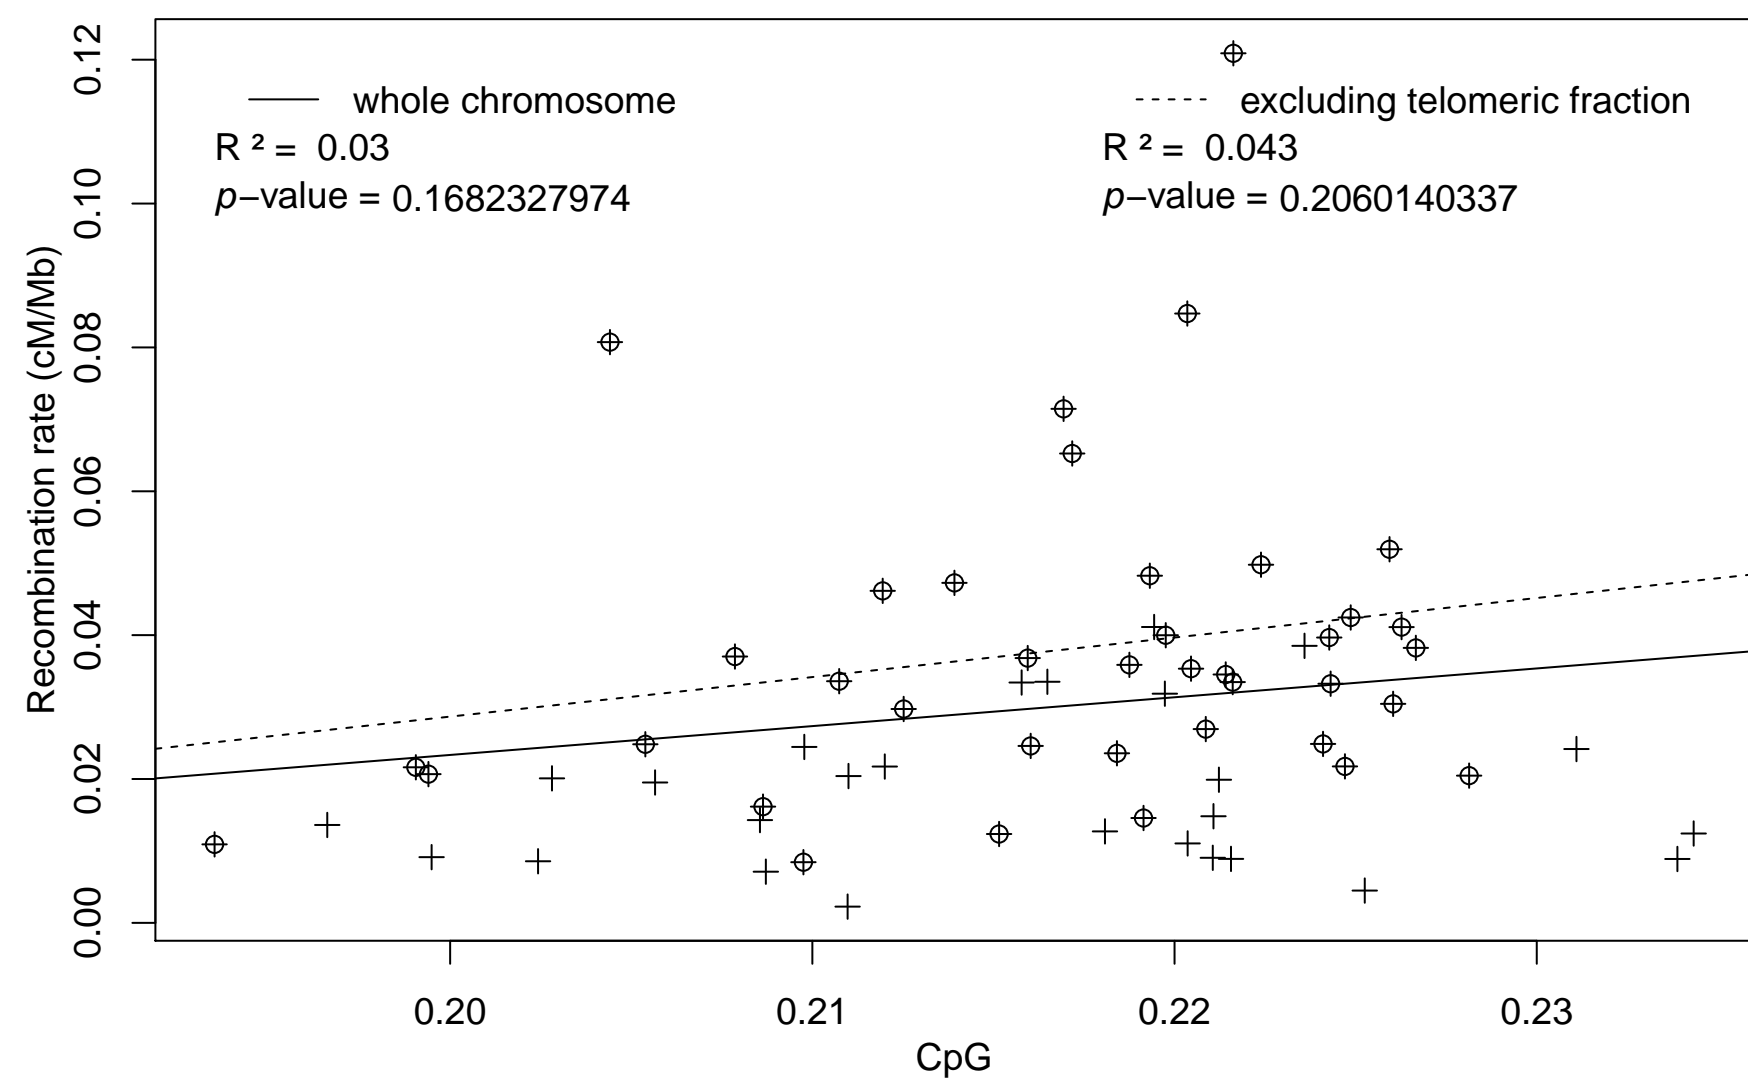**Male Chr 4 removing 30 % of total length VALUES CpG**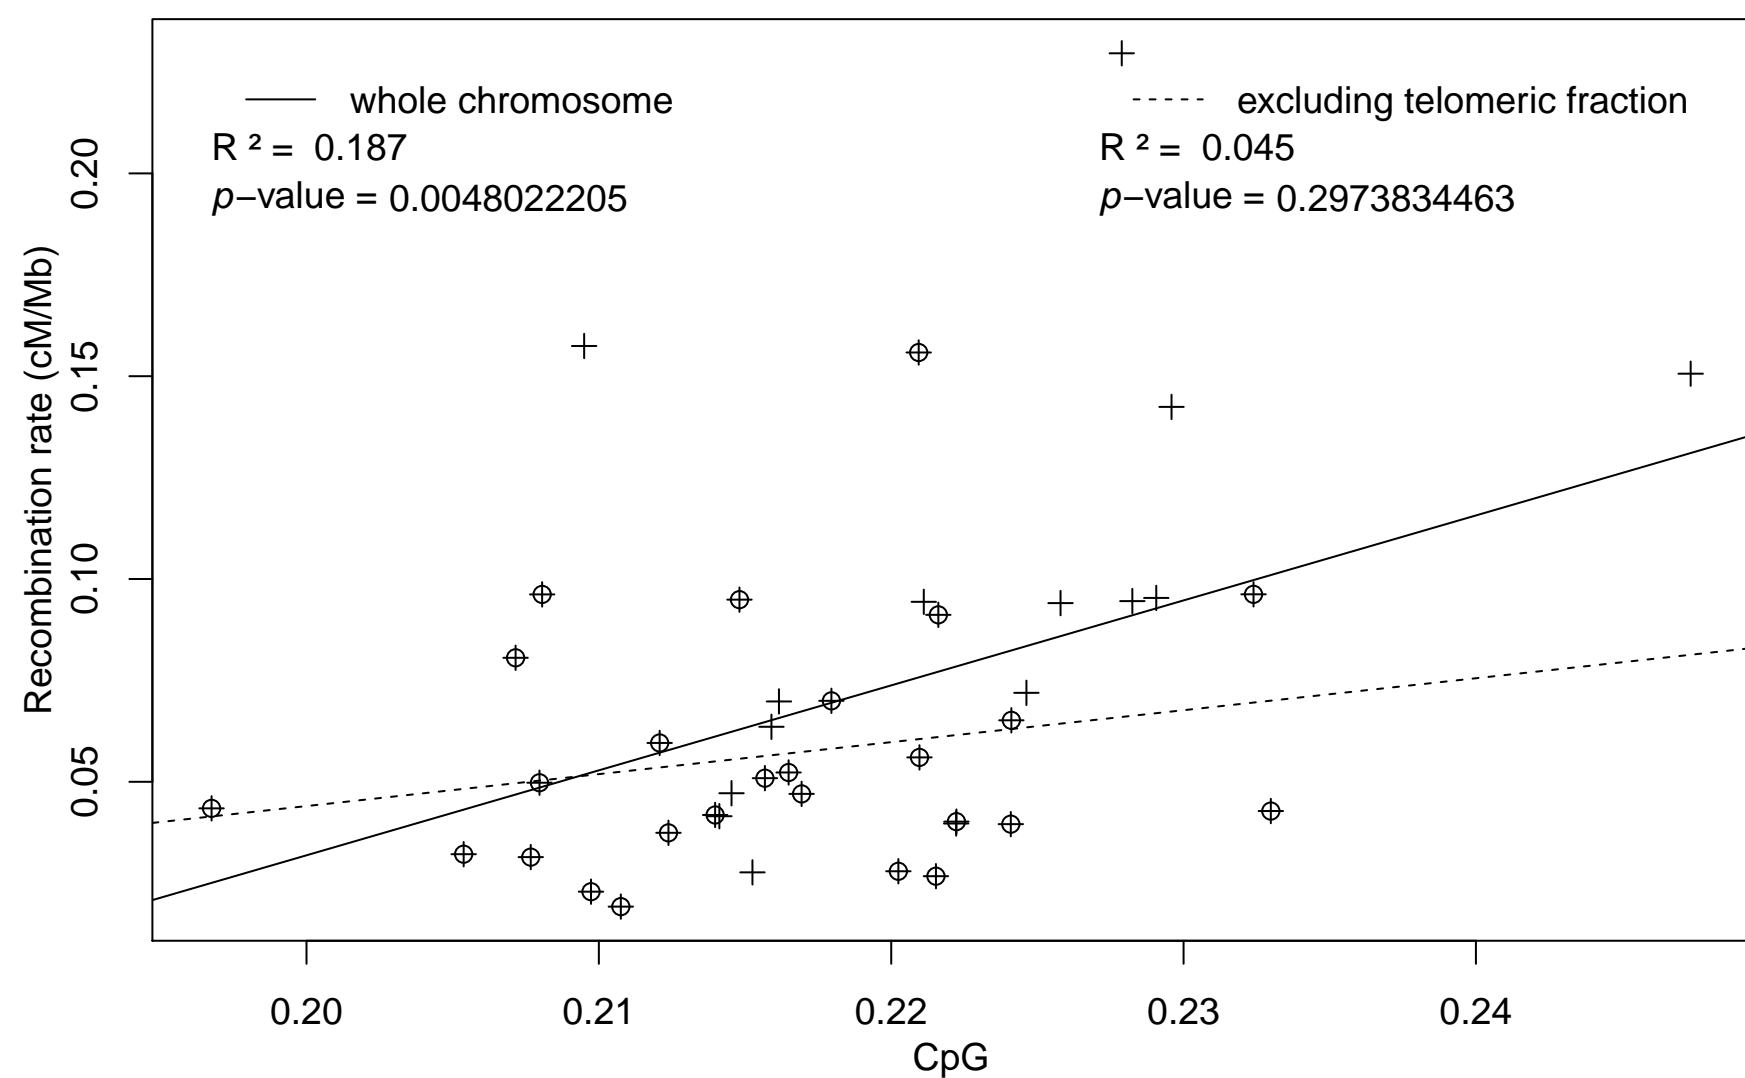**Female Chr 4 removing 30 % of total length VALUES CpG**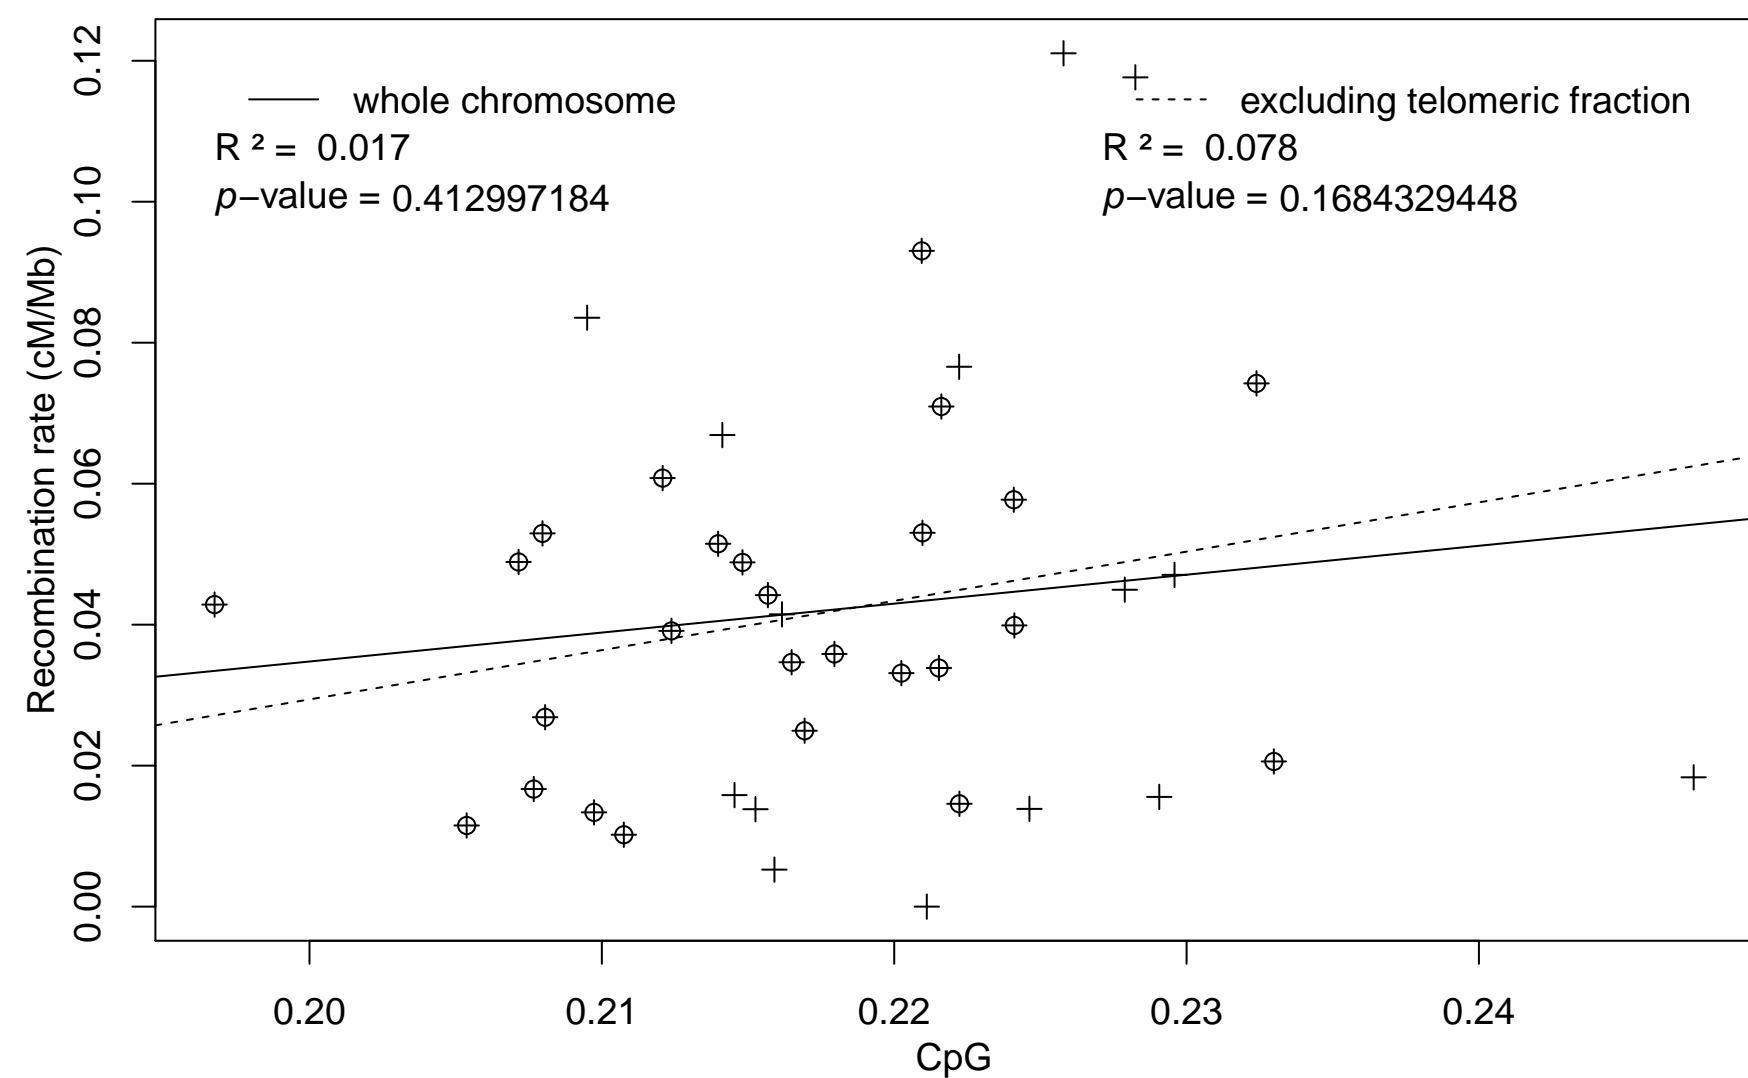**Male Chr 5 removing 30 % of total length VALUES CpG**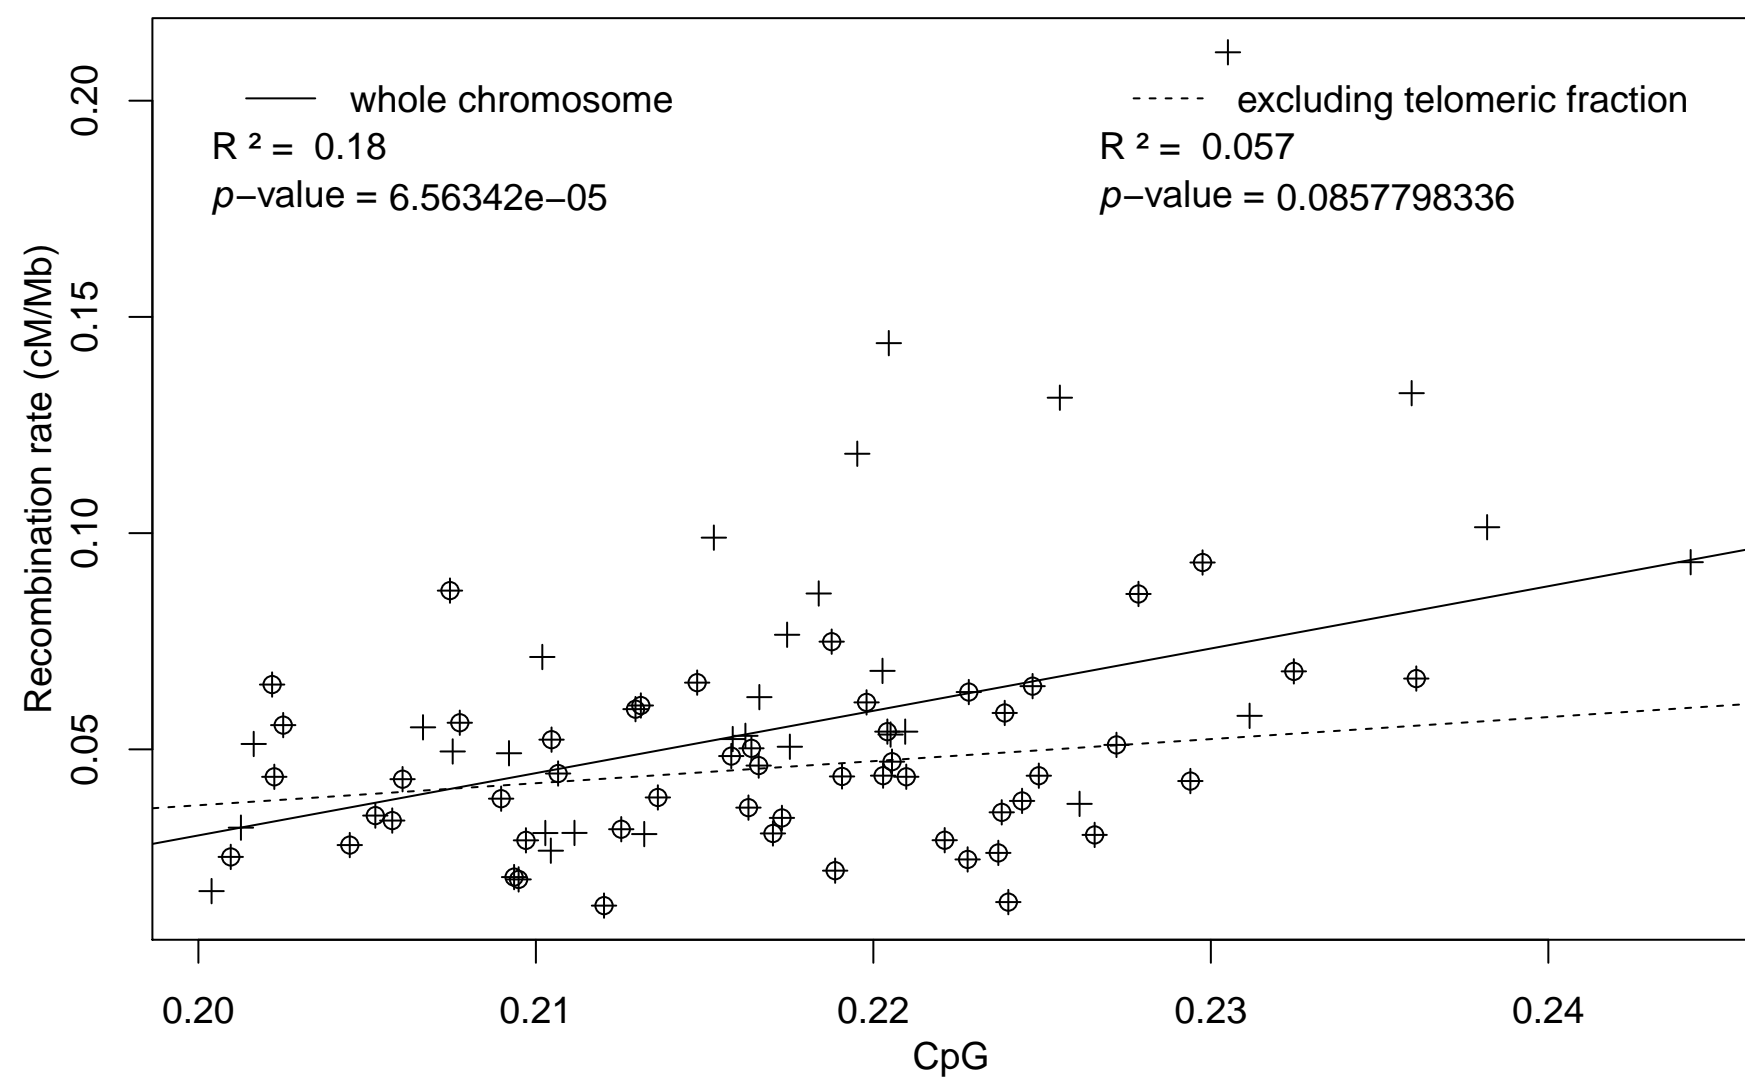**Female Chr 5 removing 30 % of total length VALUES CpG**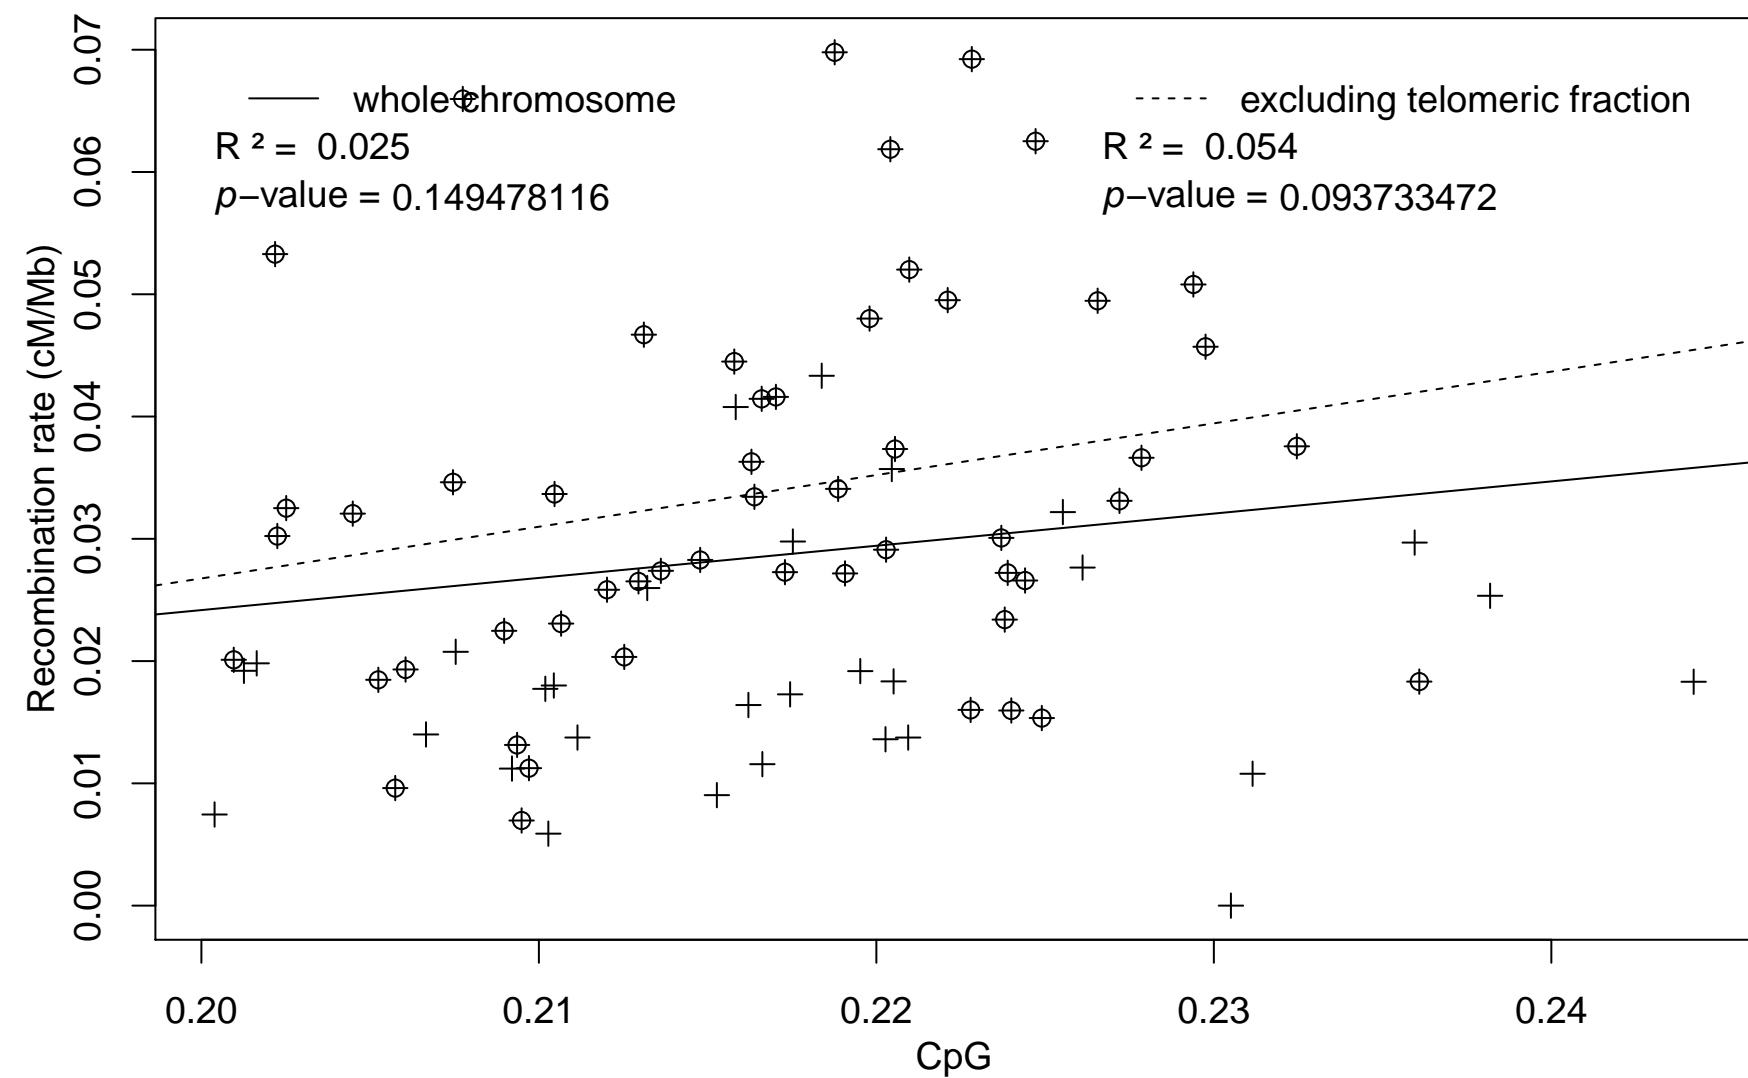

**Male Chr 1 removing 50 % of total length VALUES CpG**

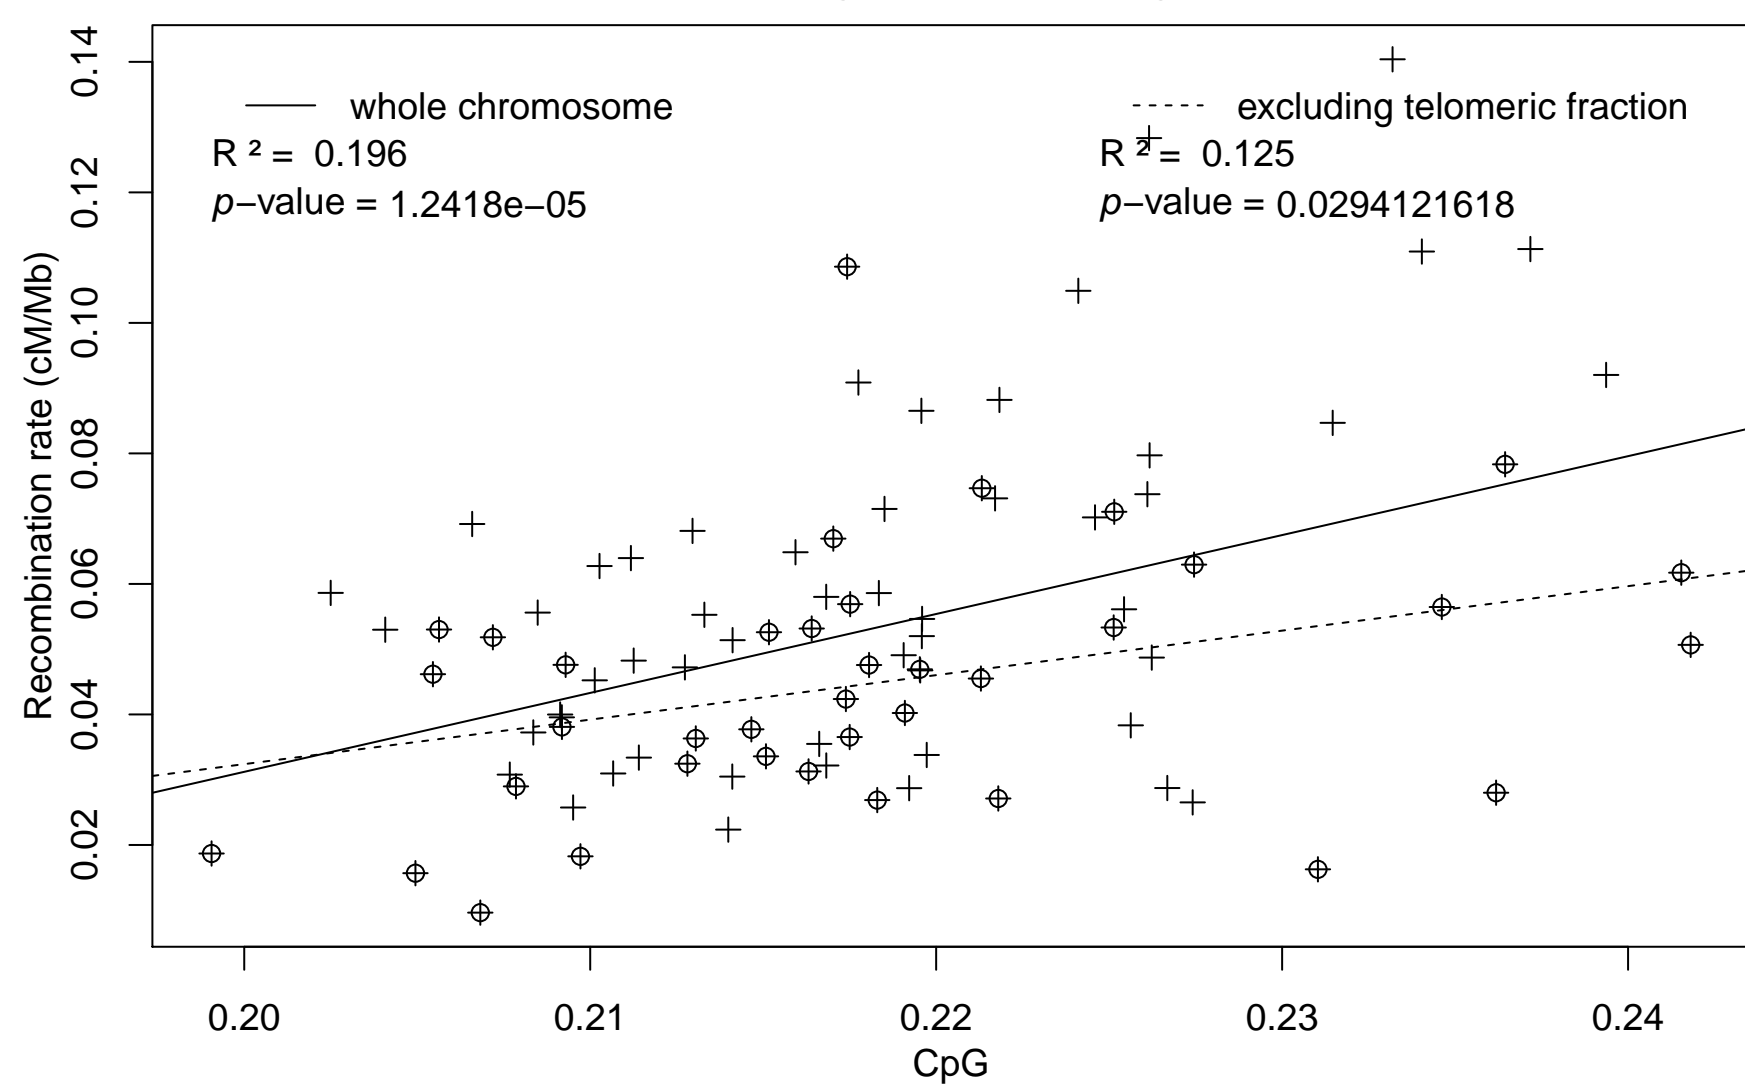

**Female Chr 1 removing 50 % of total length VALUES CpG**

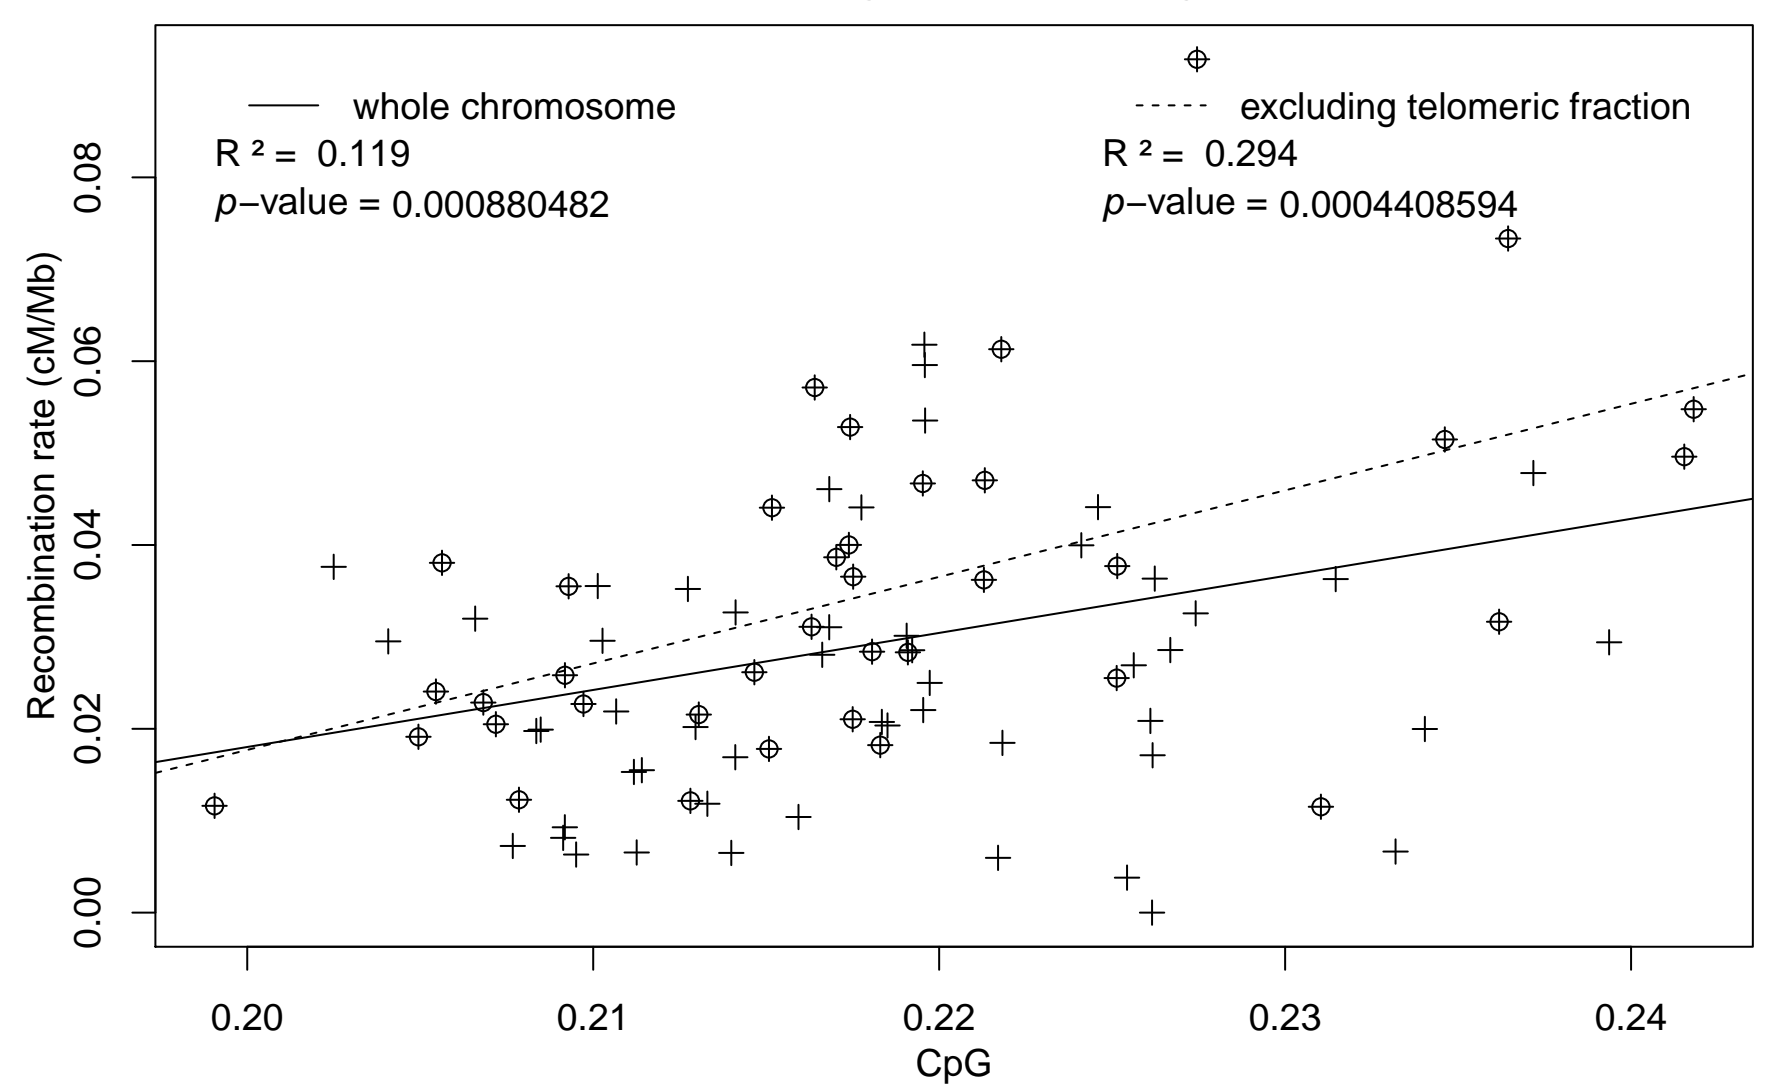

**Male Chr 2 removing 50 % of total length VALUES CpG**

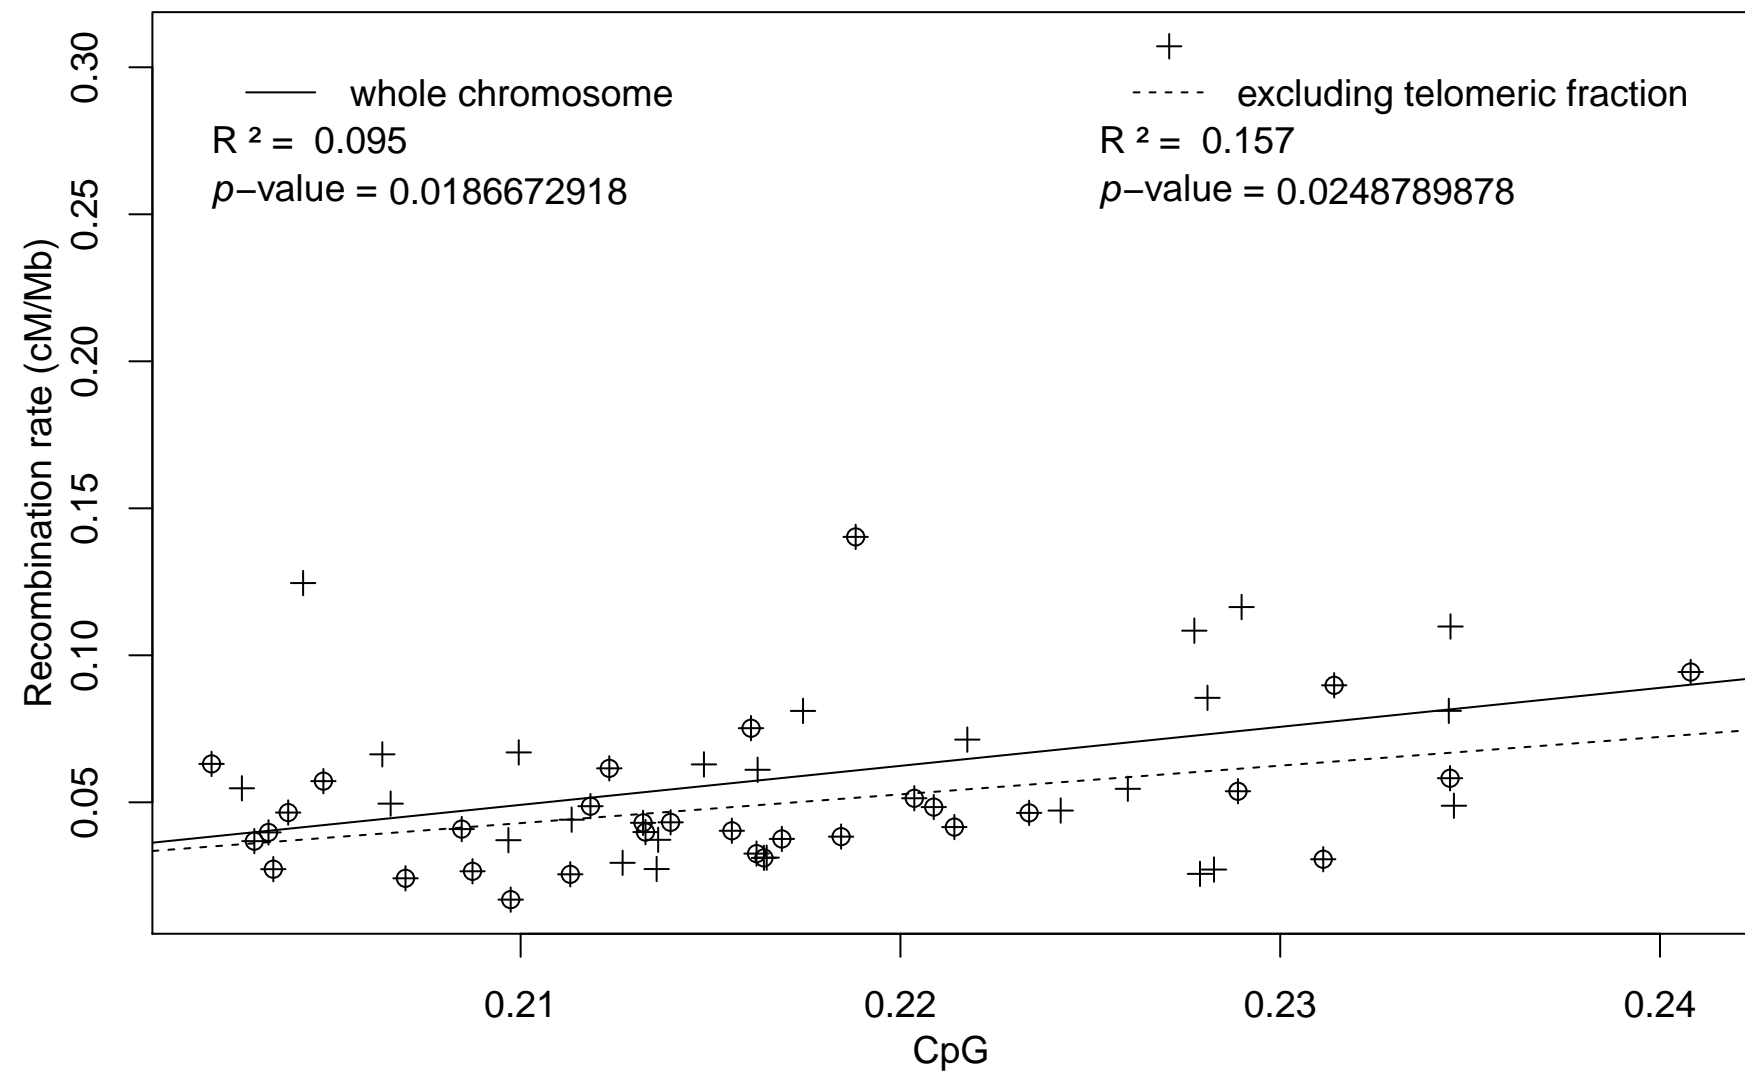

**Female Chr 2 removing 50 % of total length VALUES CpG**

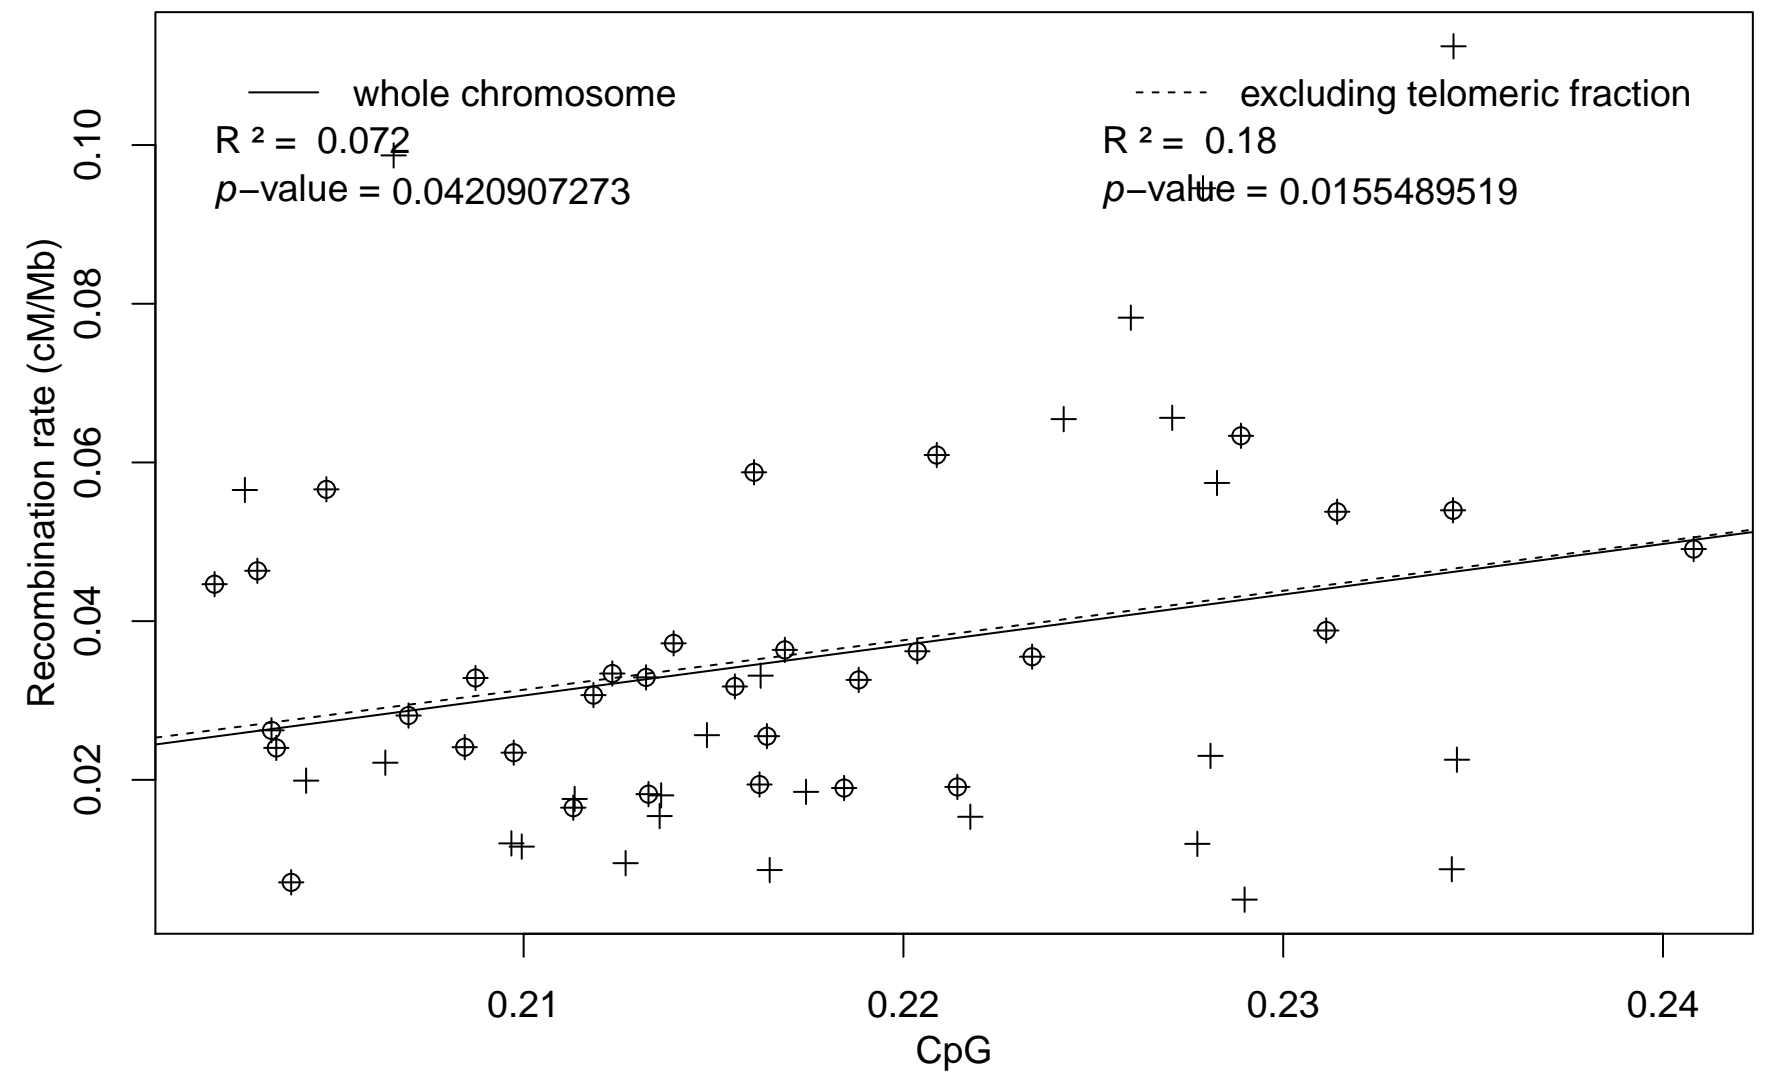

**Male Chr 3 removing 50 % of total length VALUES CpG**

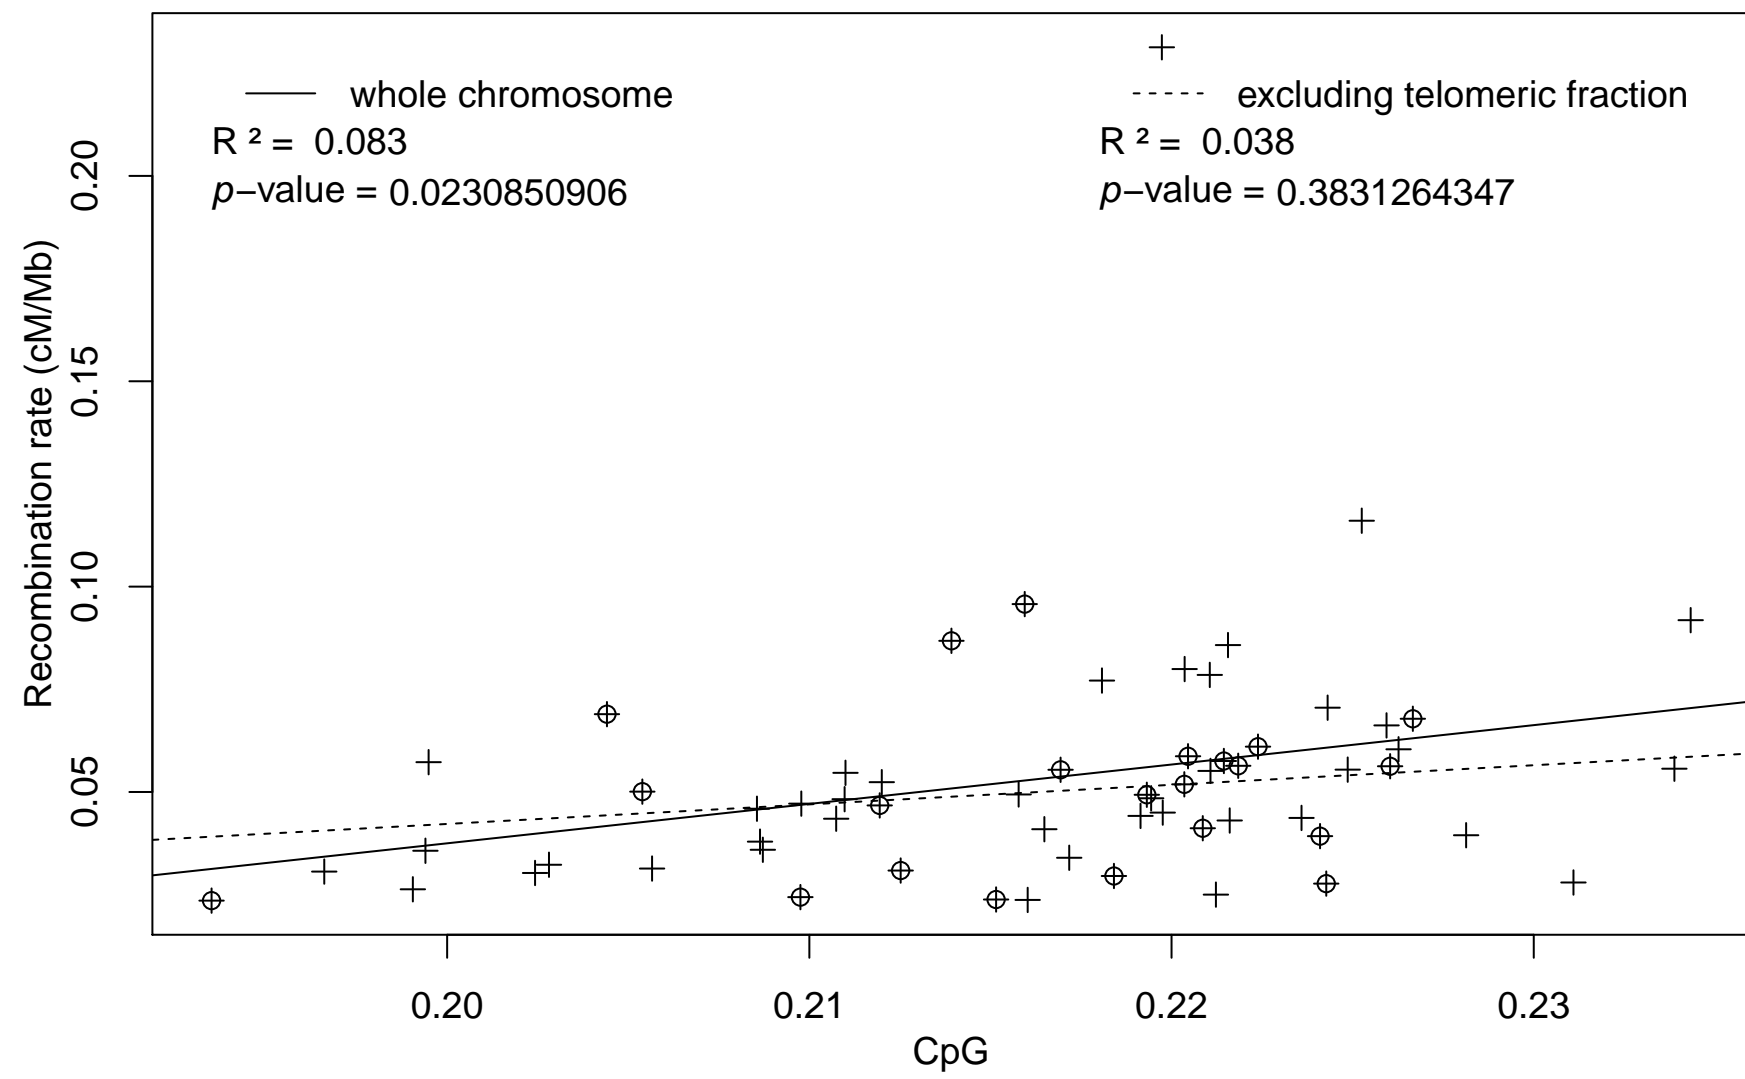

**Female Chr 3 removing 50 % of total length VALUES CpG**

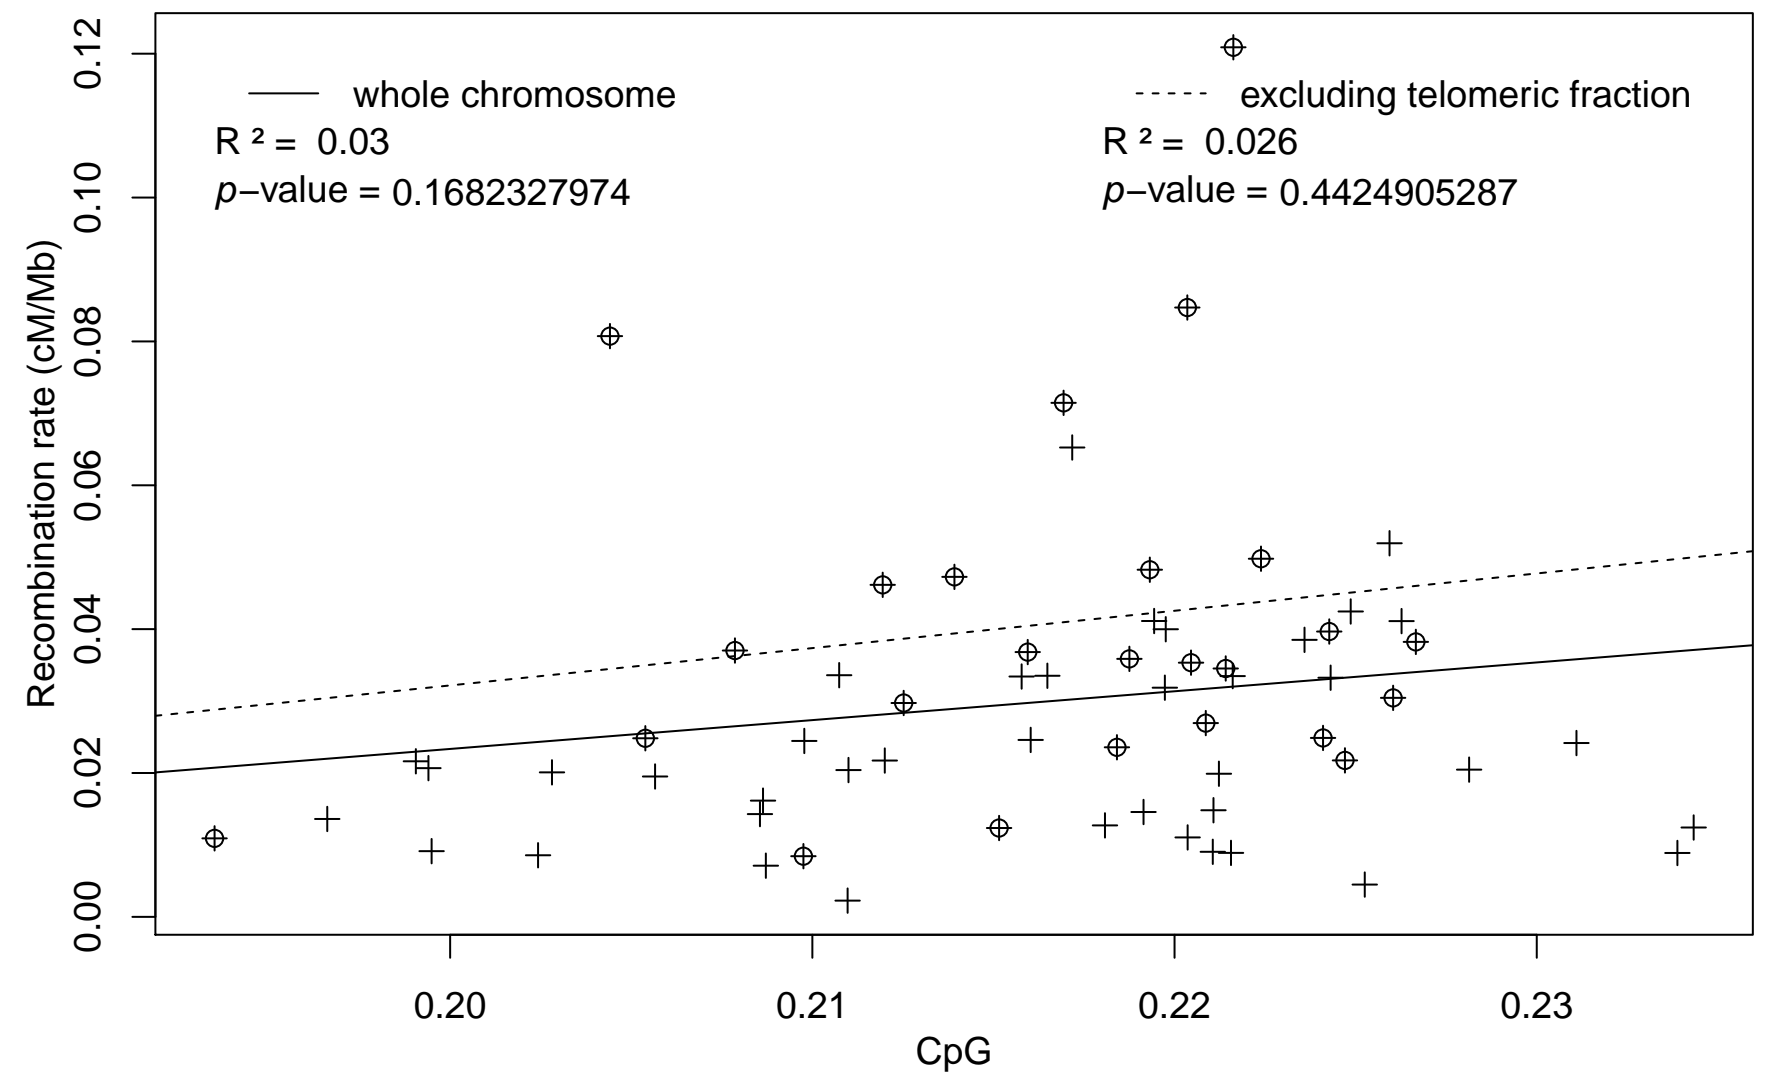

**Male Chr 4 removing 50 % of total length VALUES CpG**

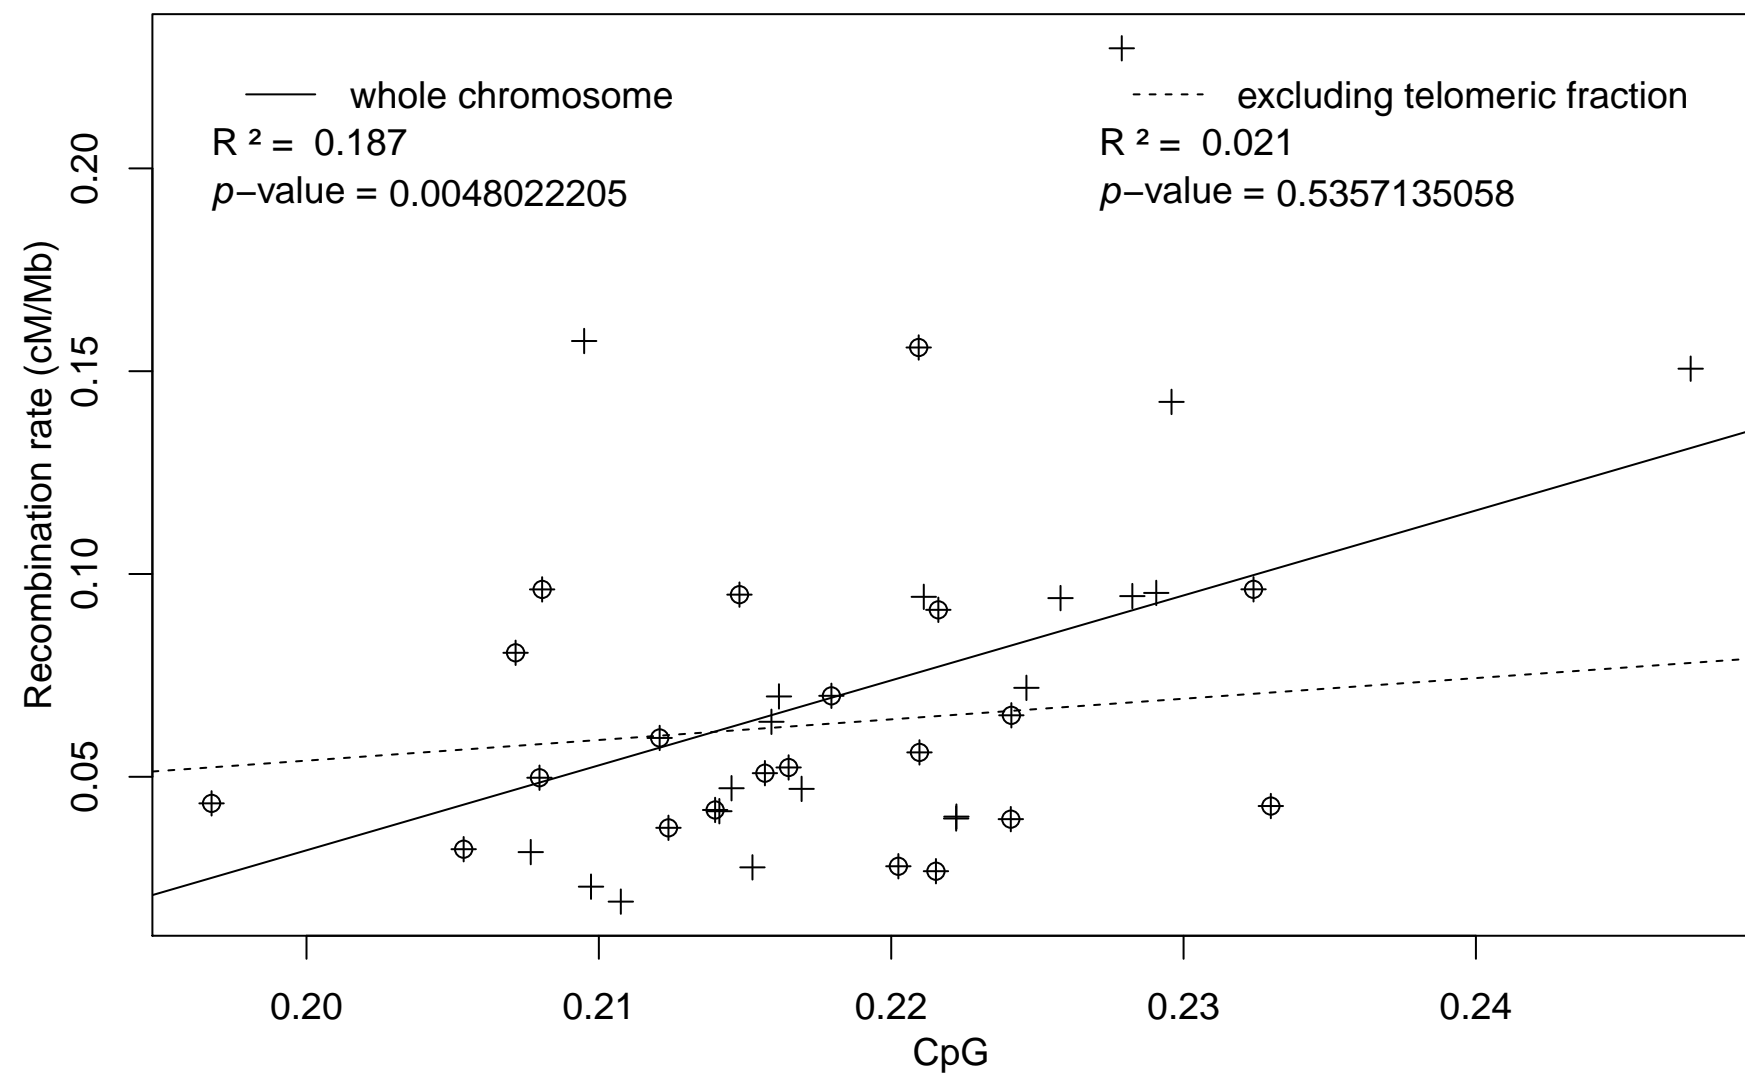

**Female Chr 4 removing 50 % of total length VALUES CpG**

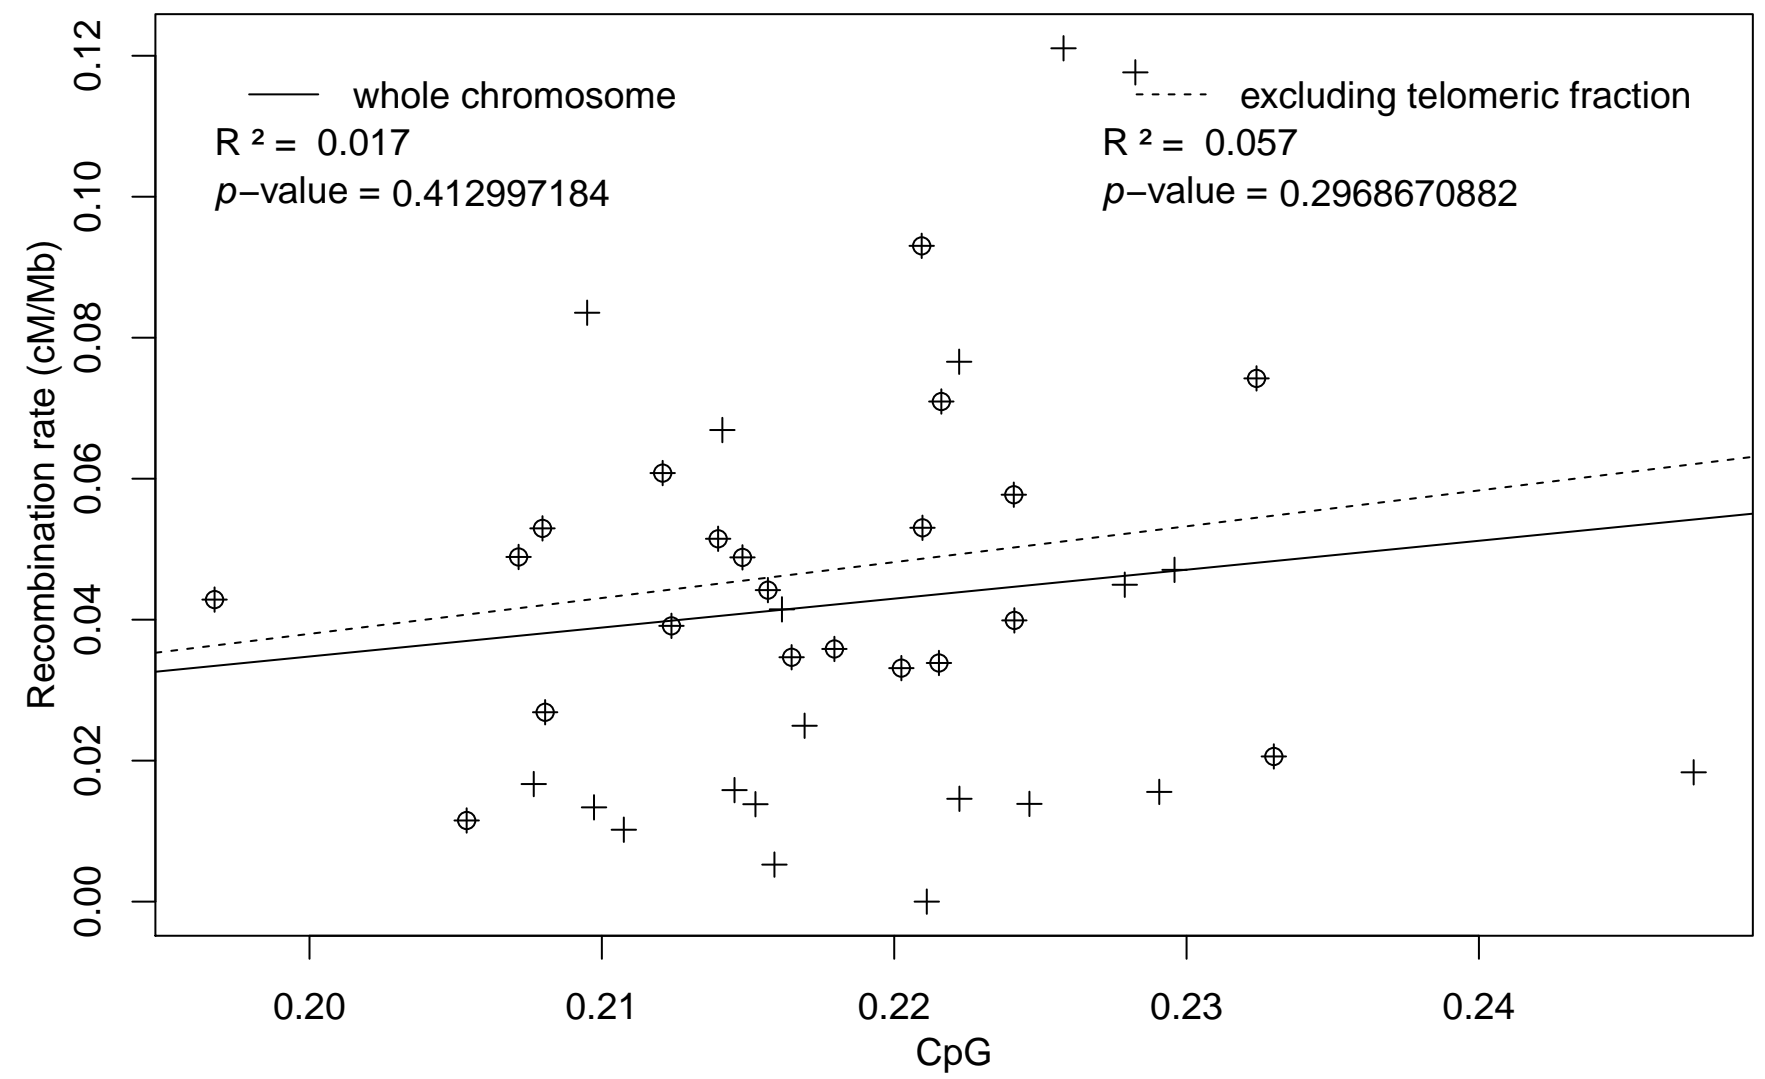

**Male Chr 5 removing 50 % of total length VALUES CpG**

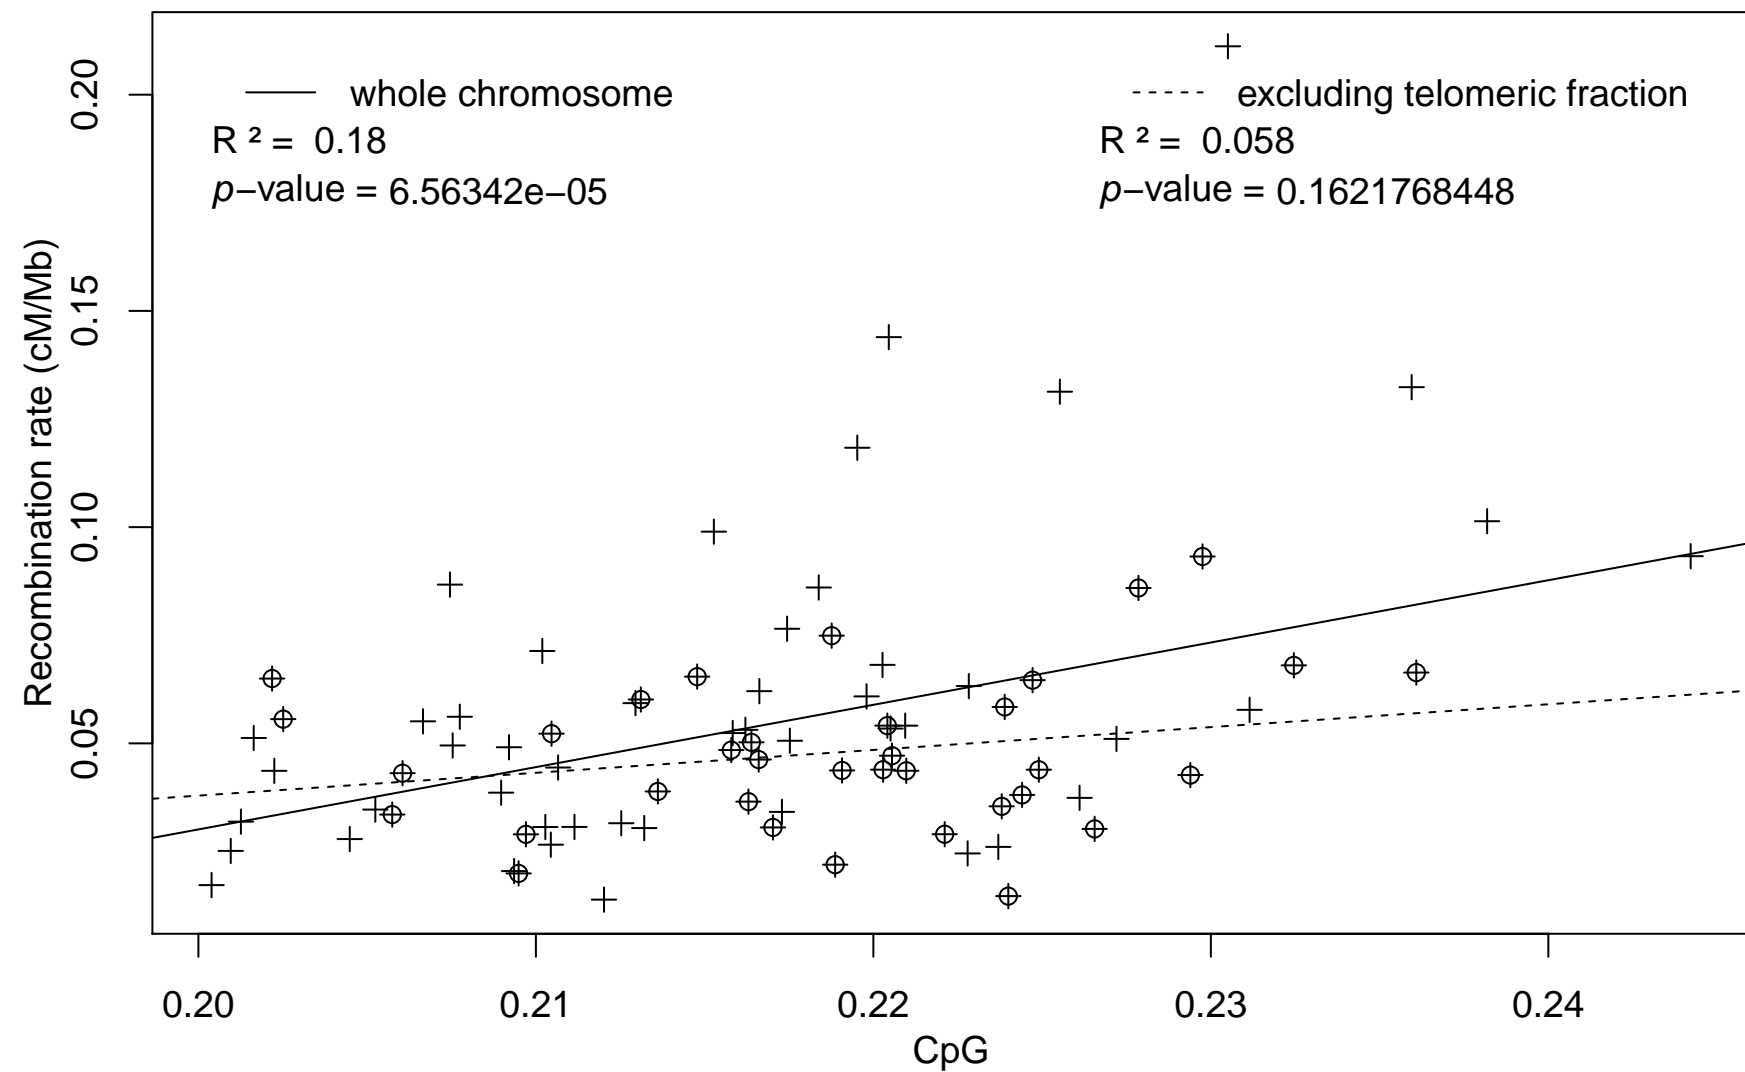

**Female Chr 5 removing 50 % of total length VALUES CpG**

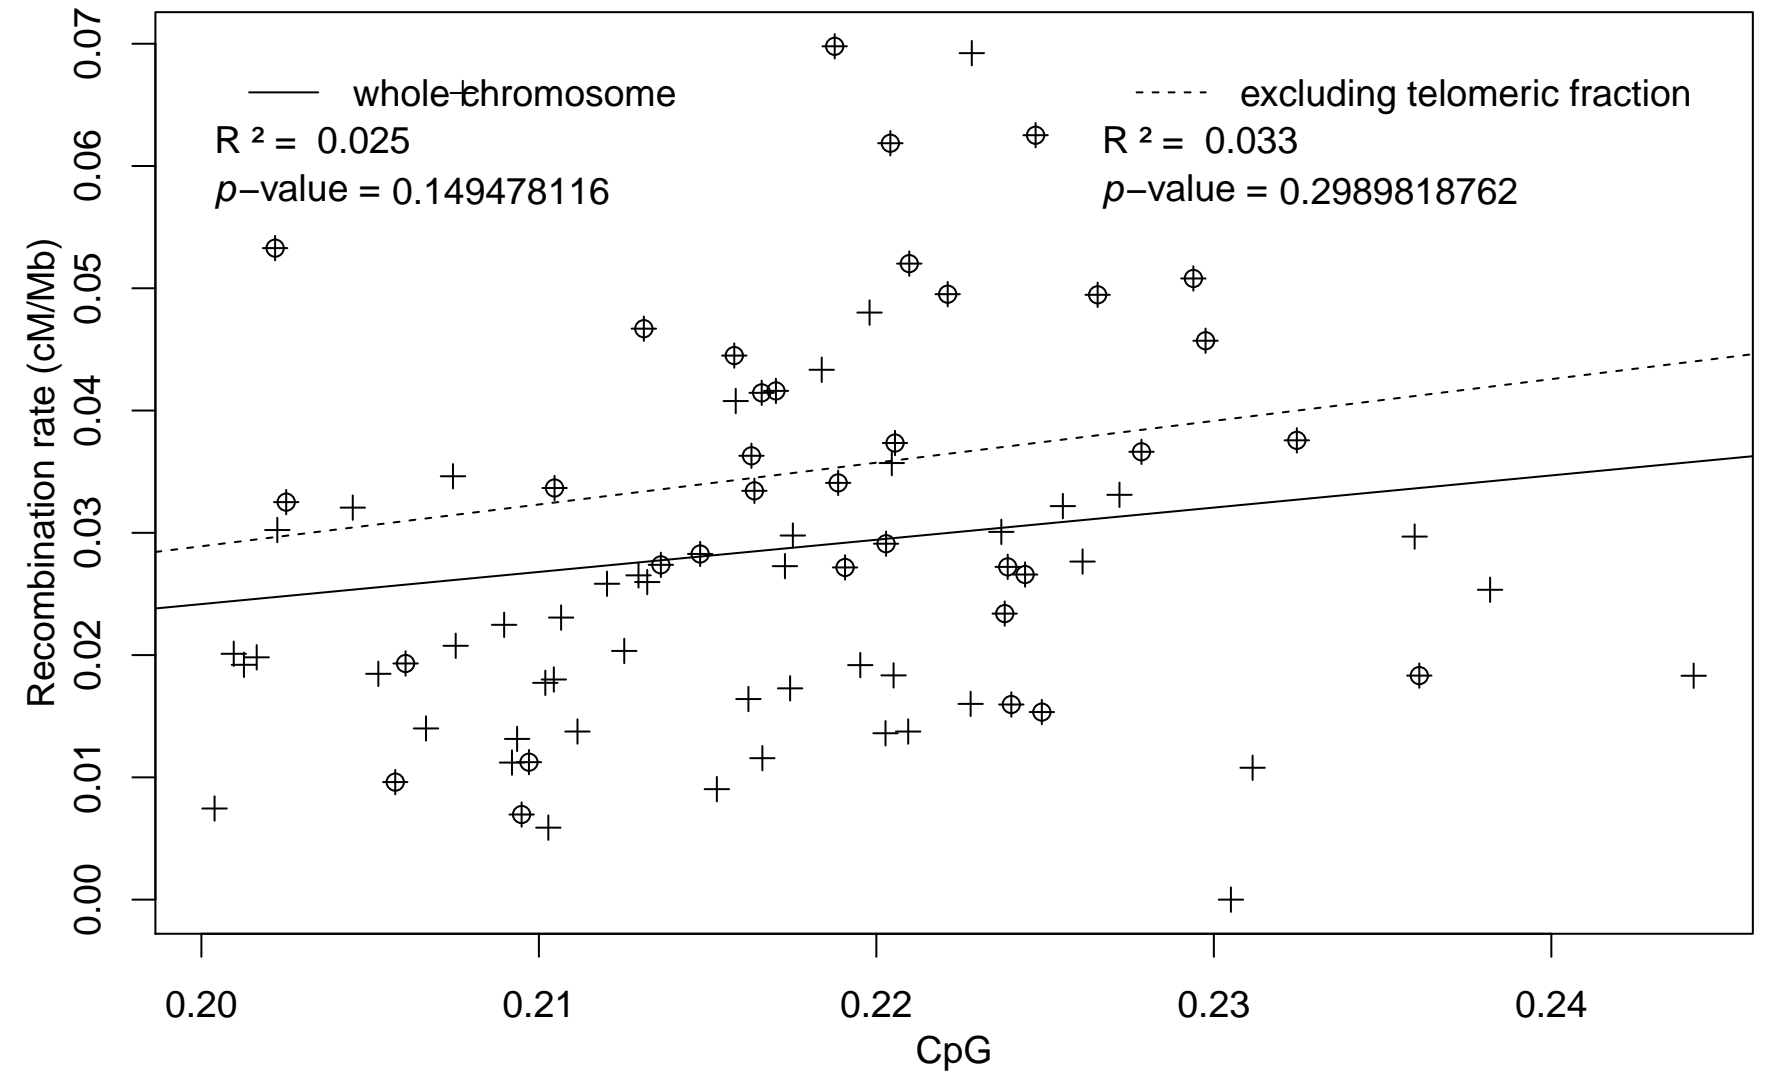

**Chromosome 1 Gene density left arm**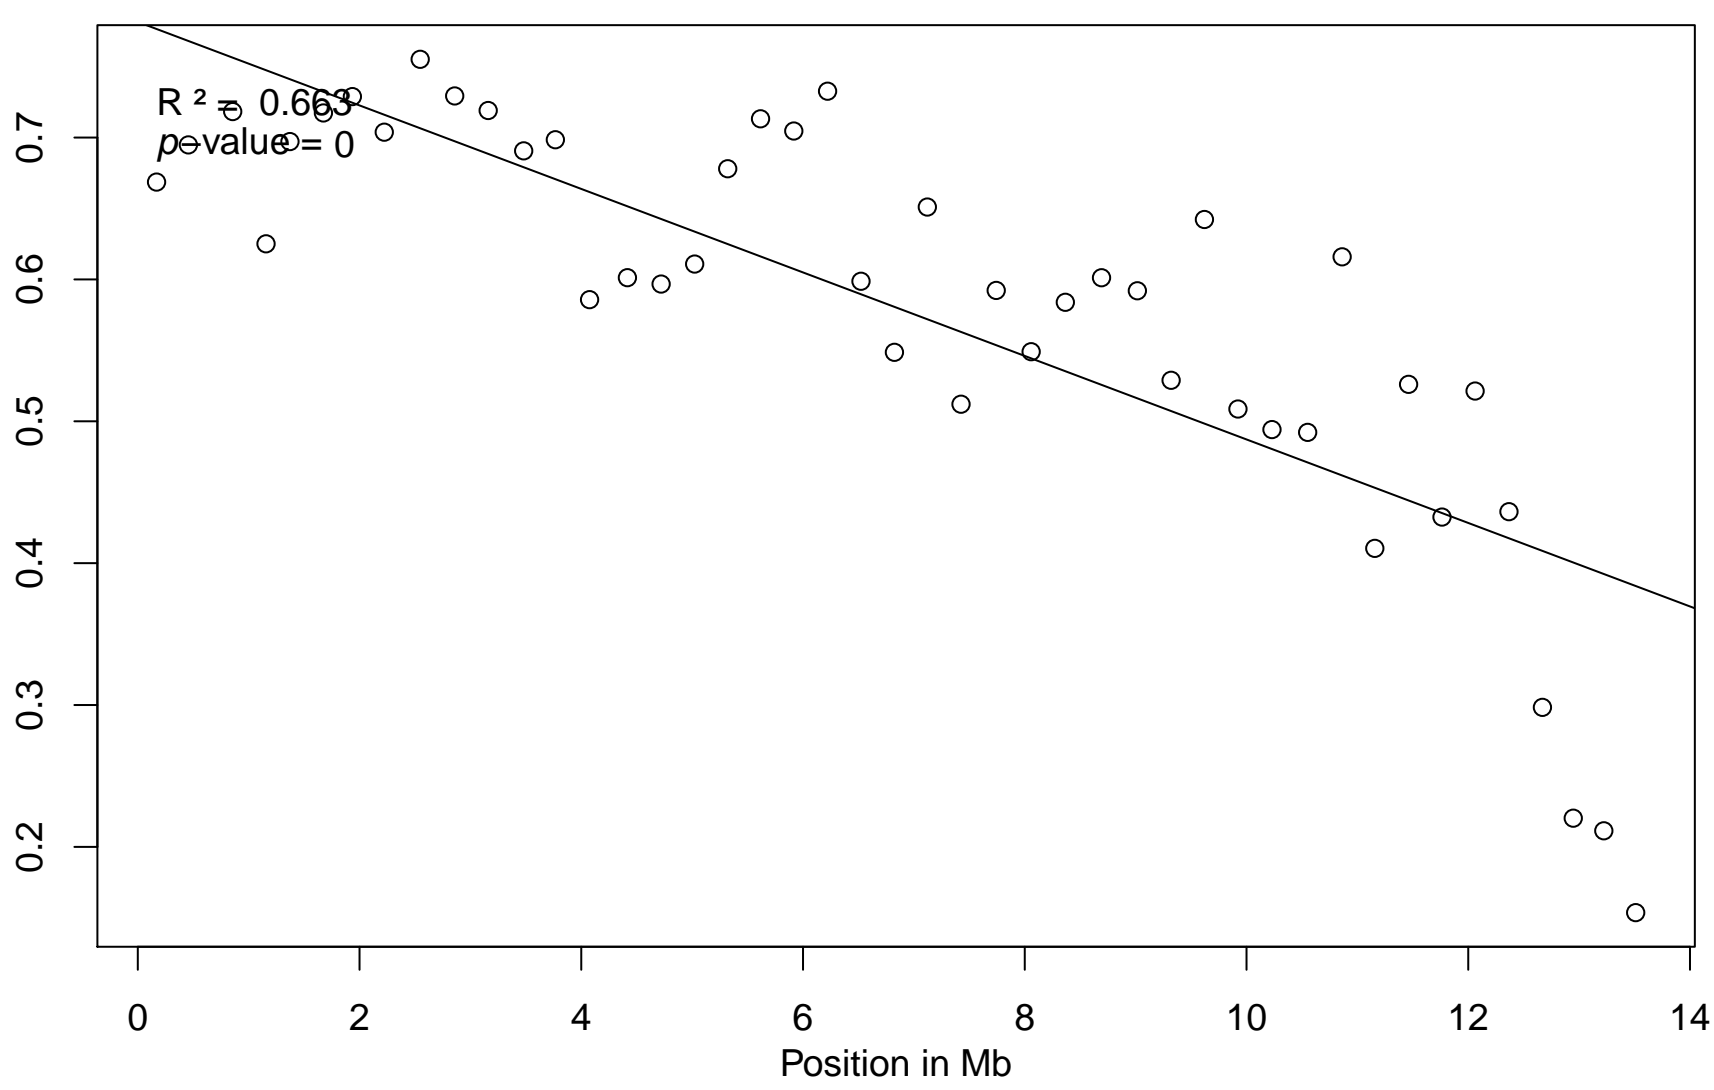**Chromosome 1 Gene density right arm**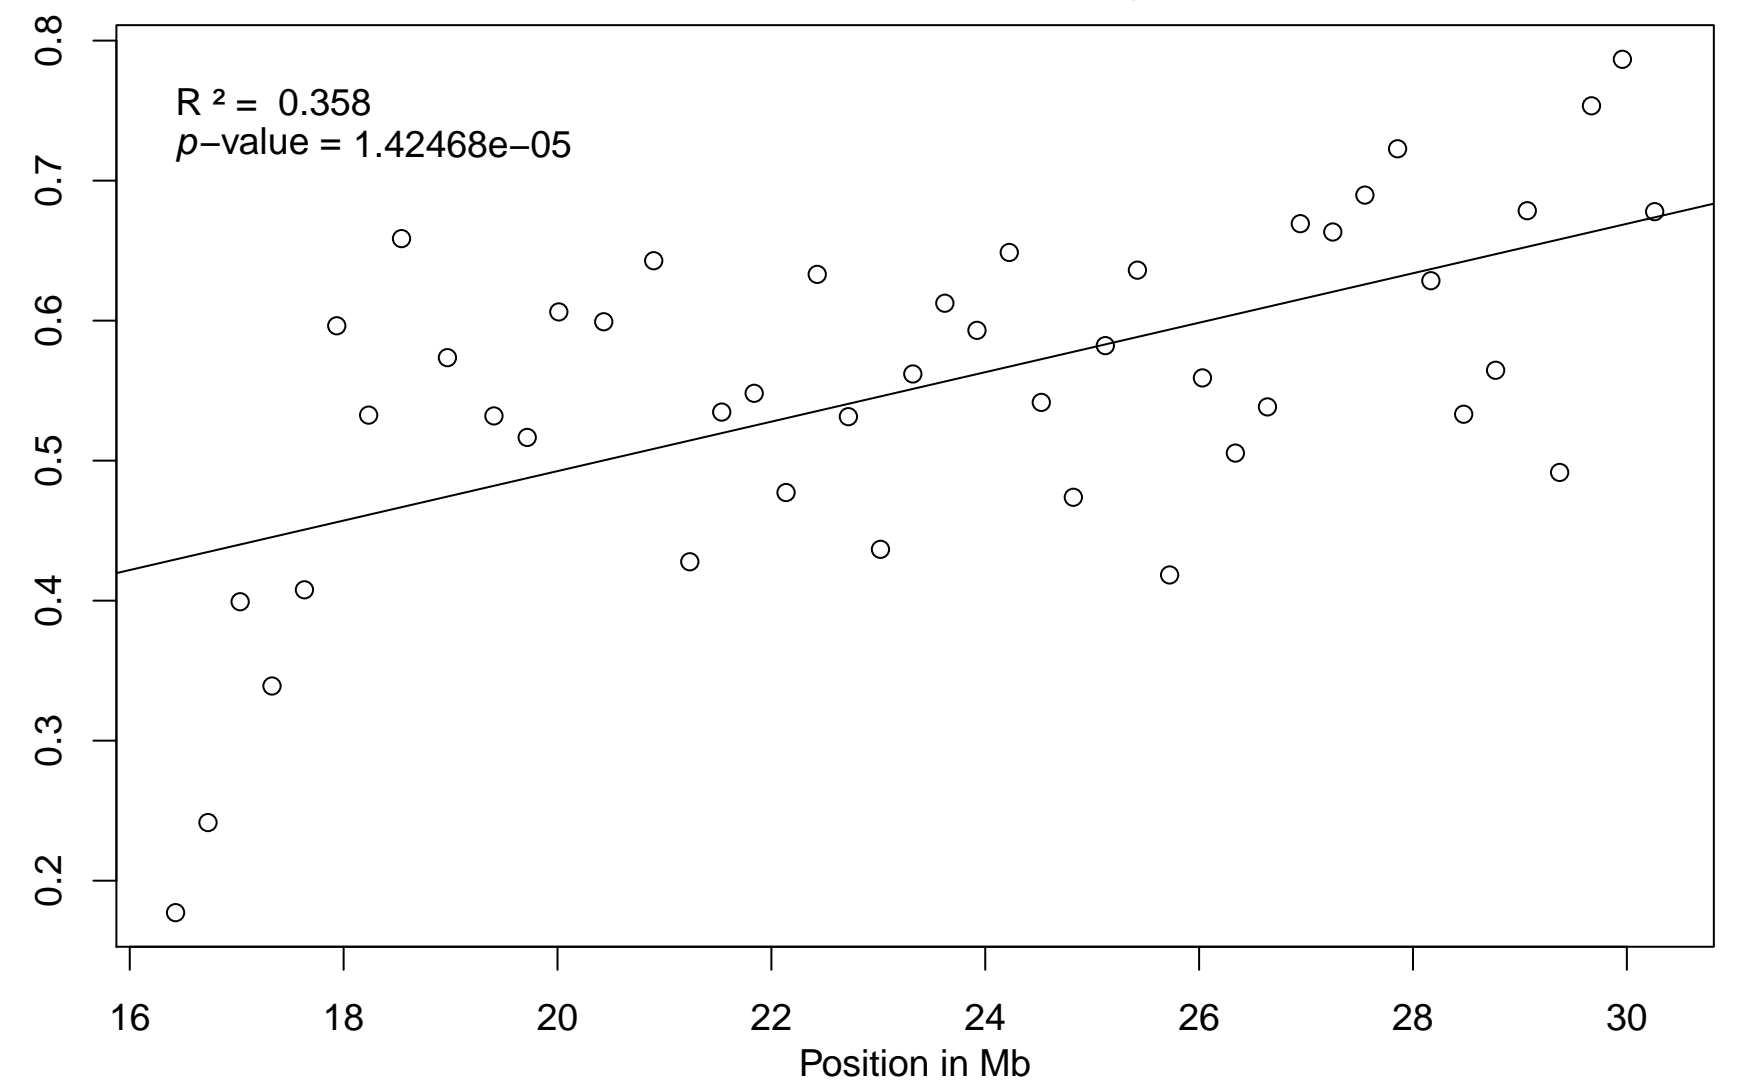**Chromosome 2 Gene density left arm**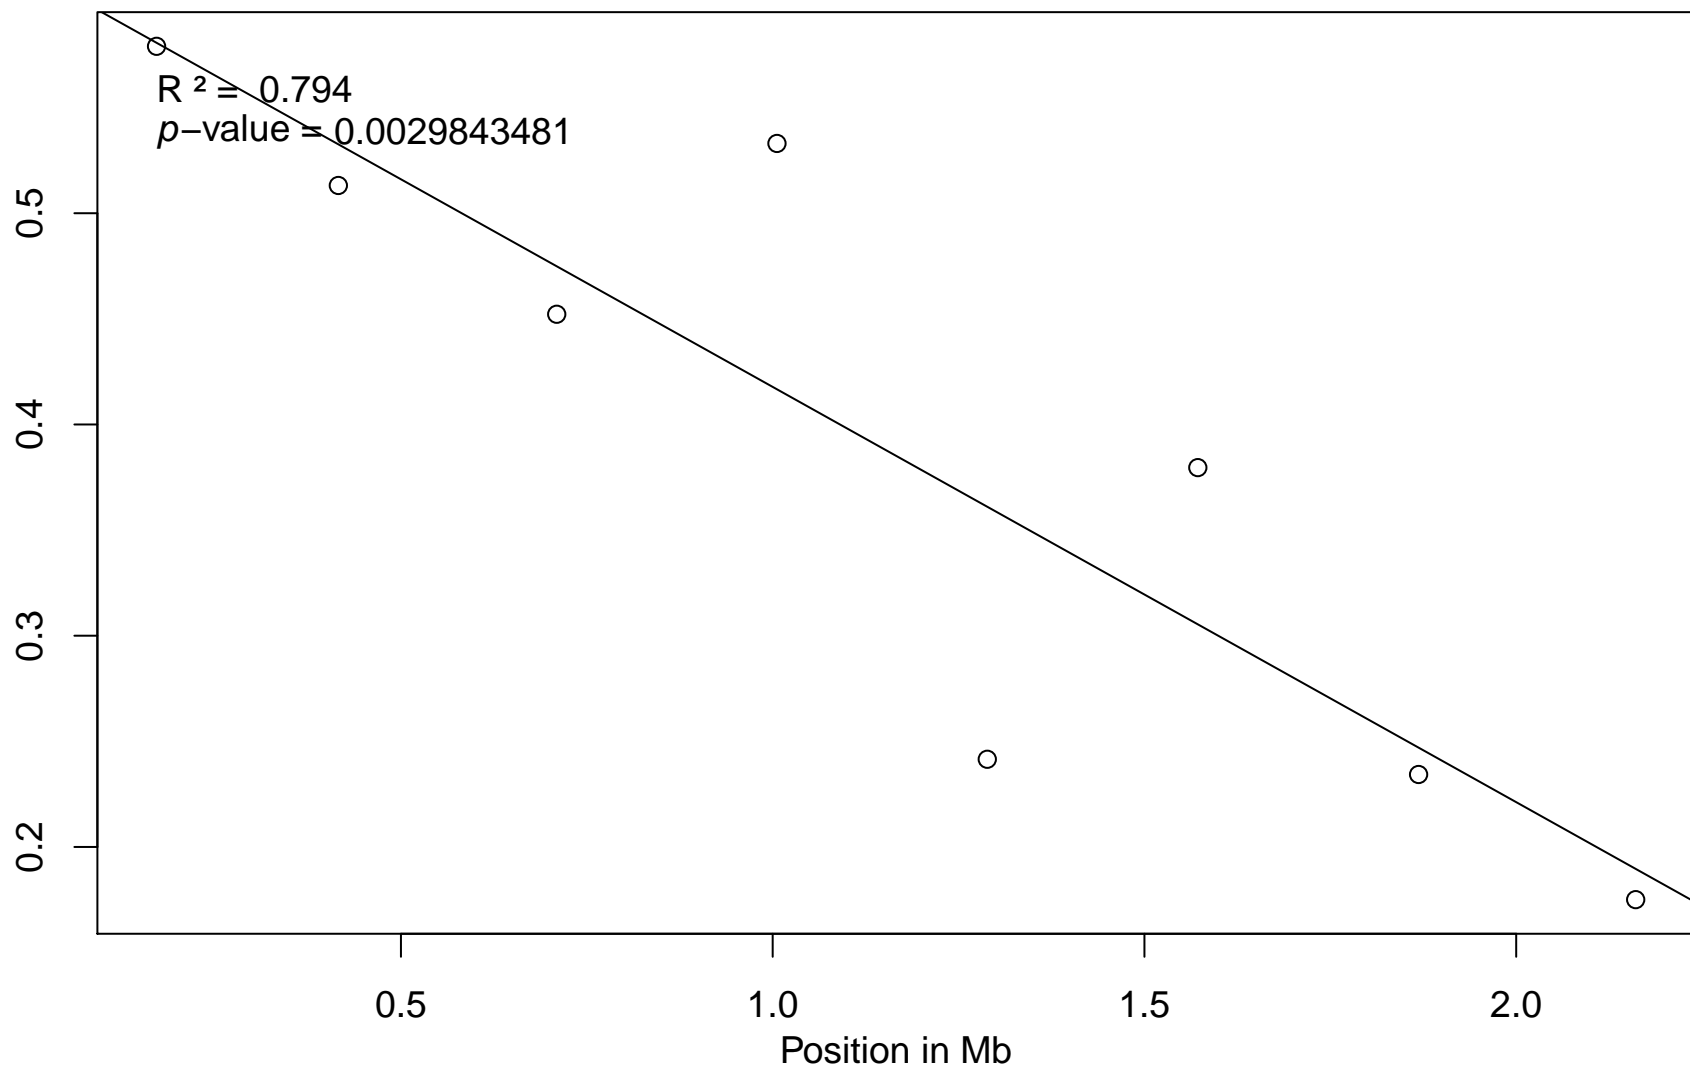**Chromosome 2 Gene density right arm**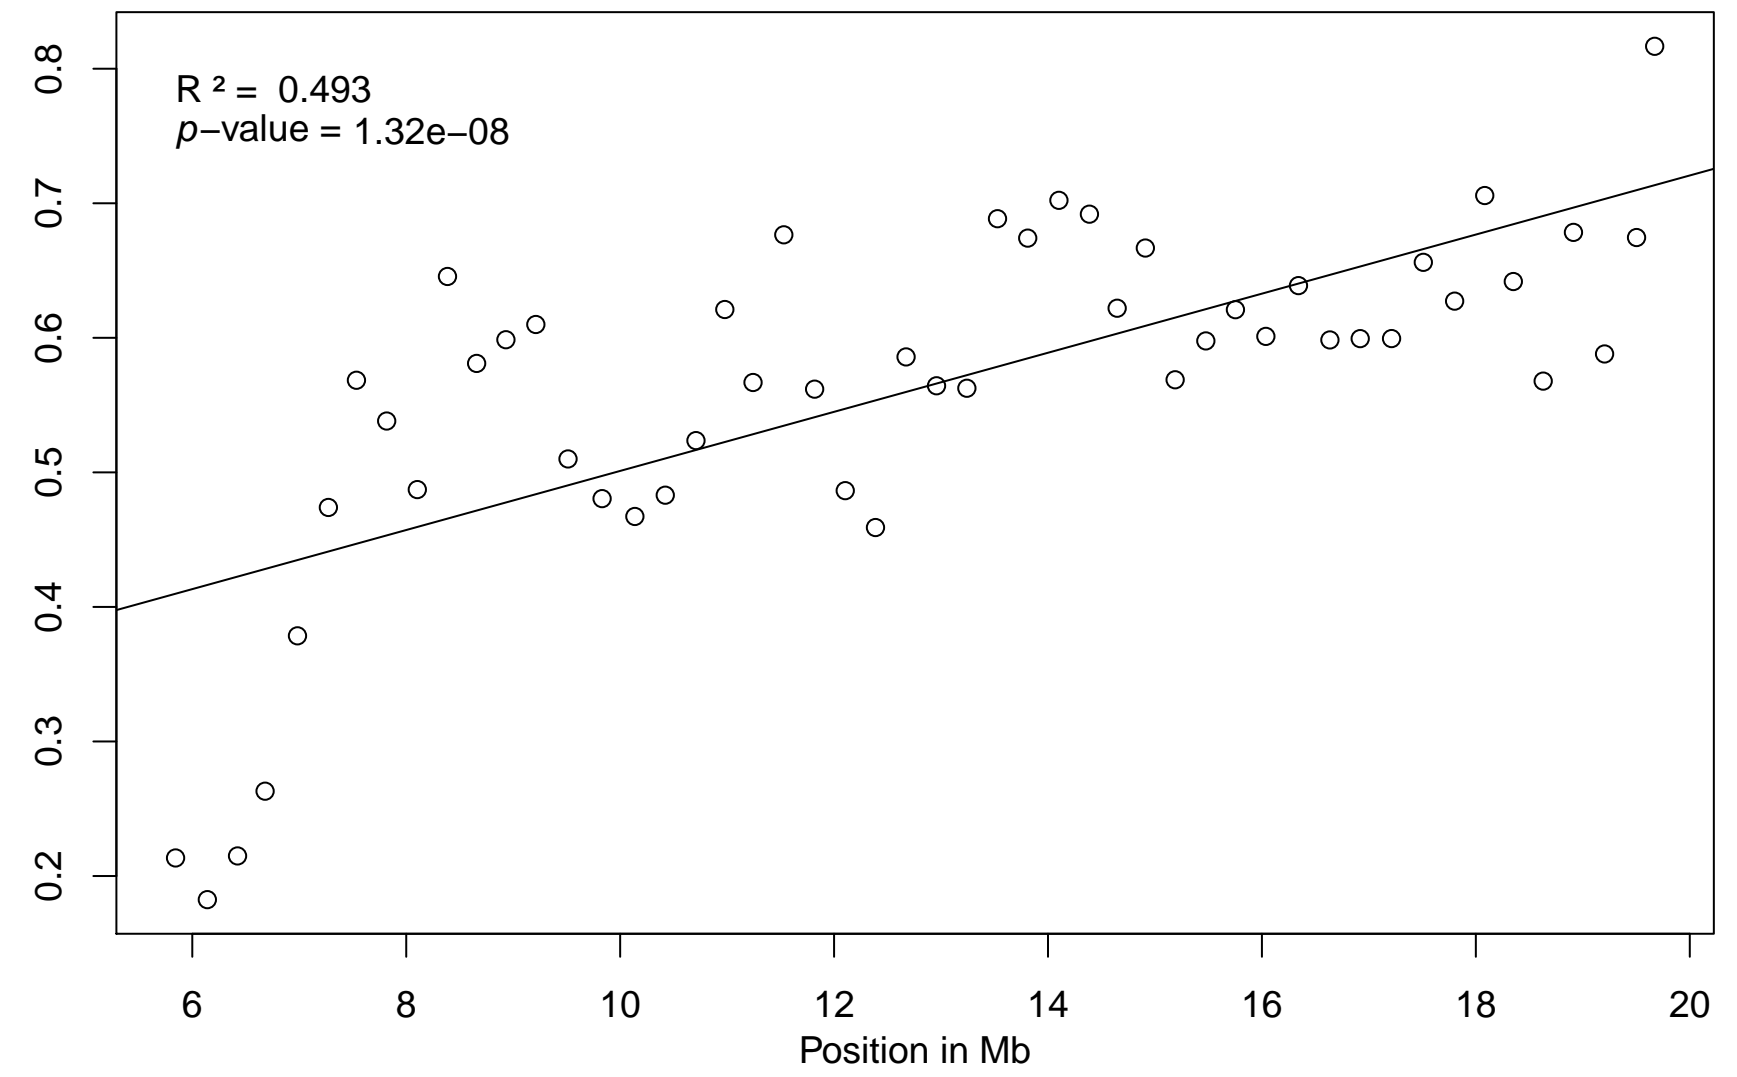**Chromosome 3 Gene density left arm**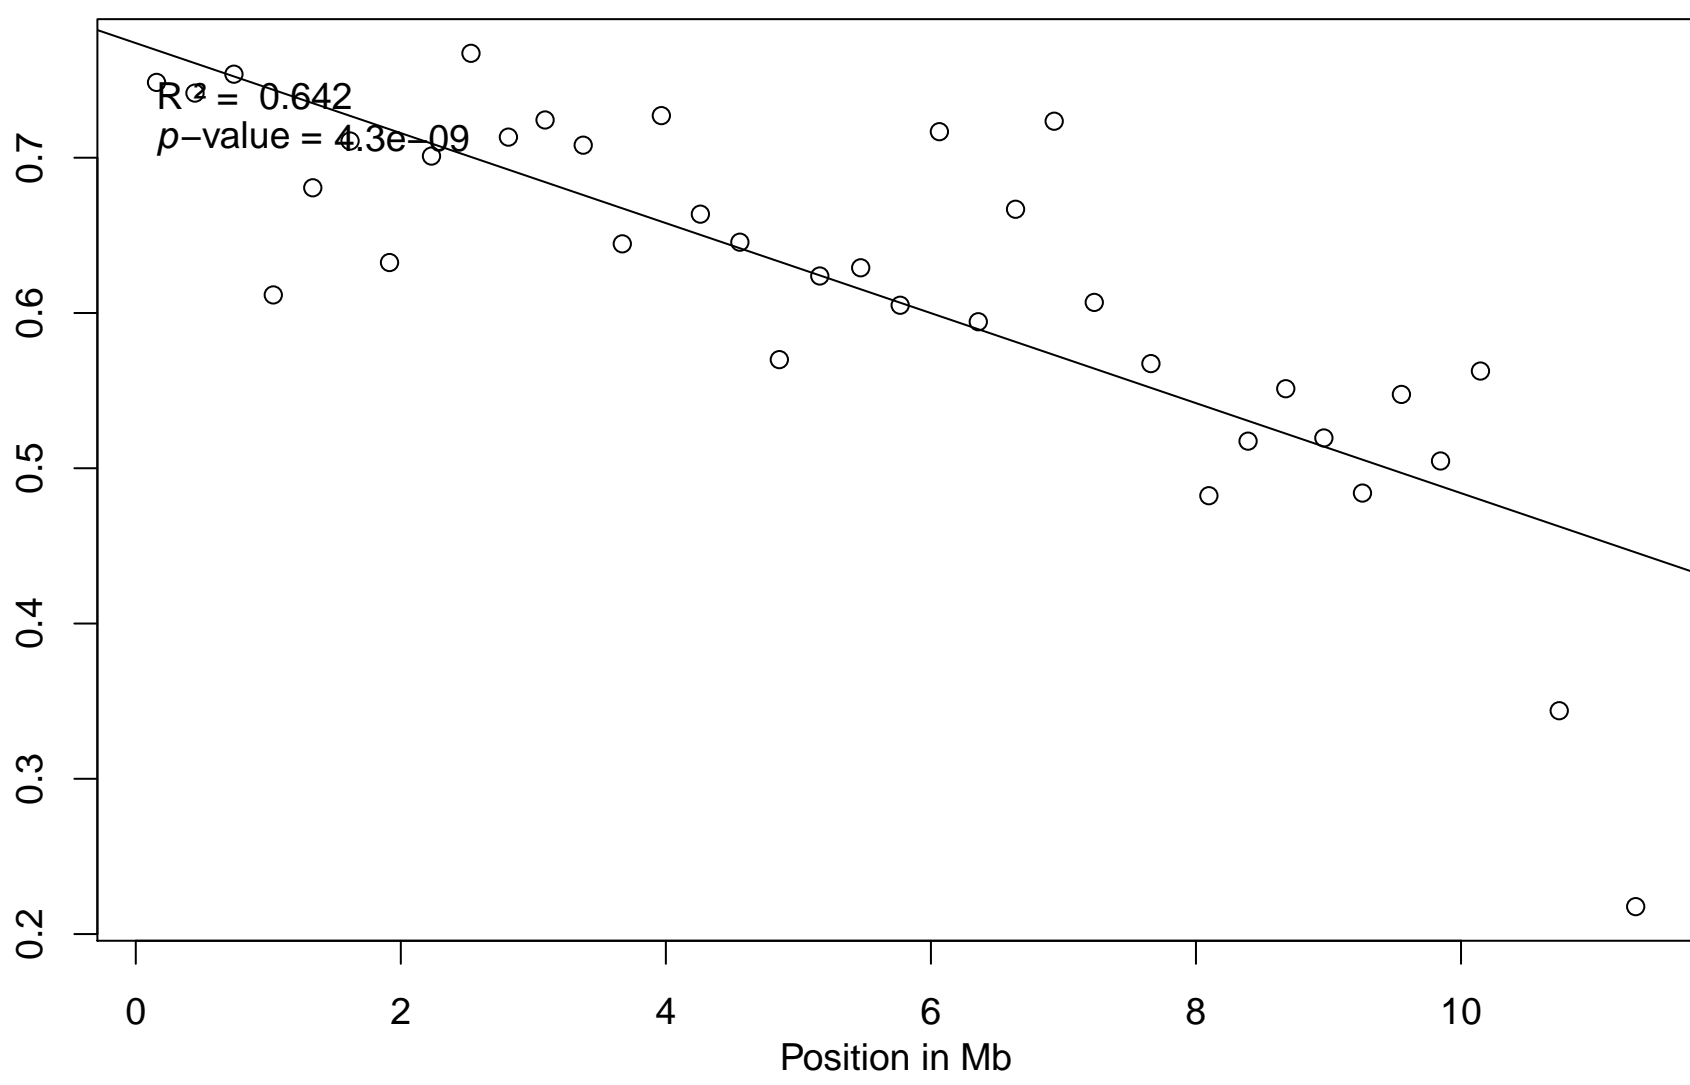**Chromosome 3 Gene density right arm**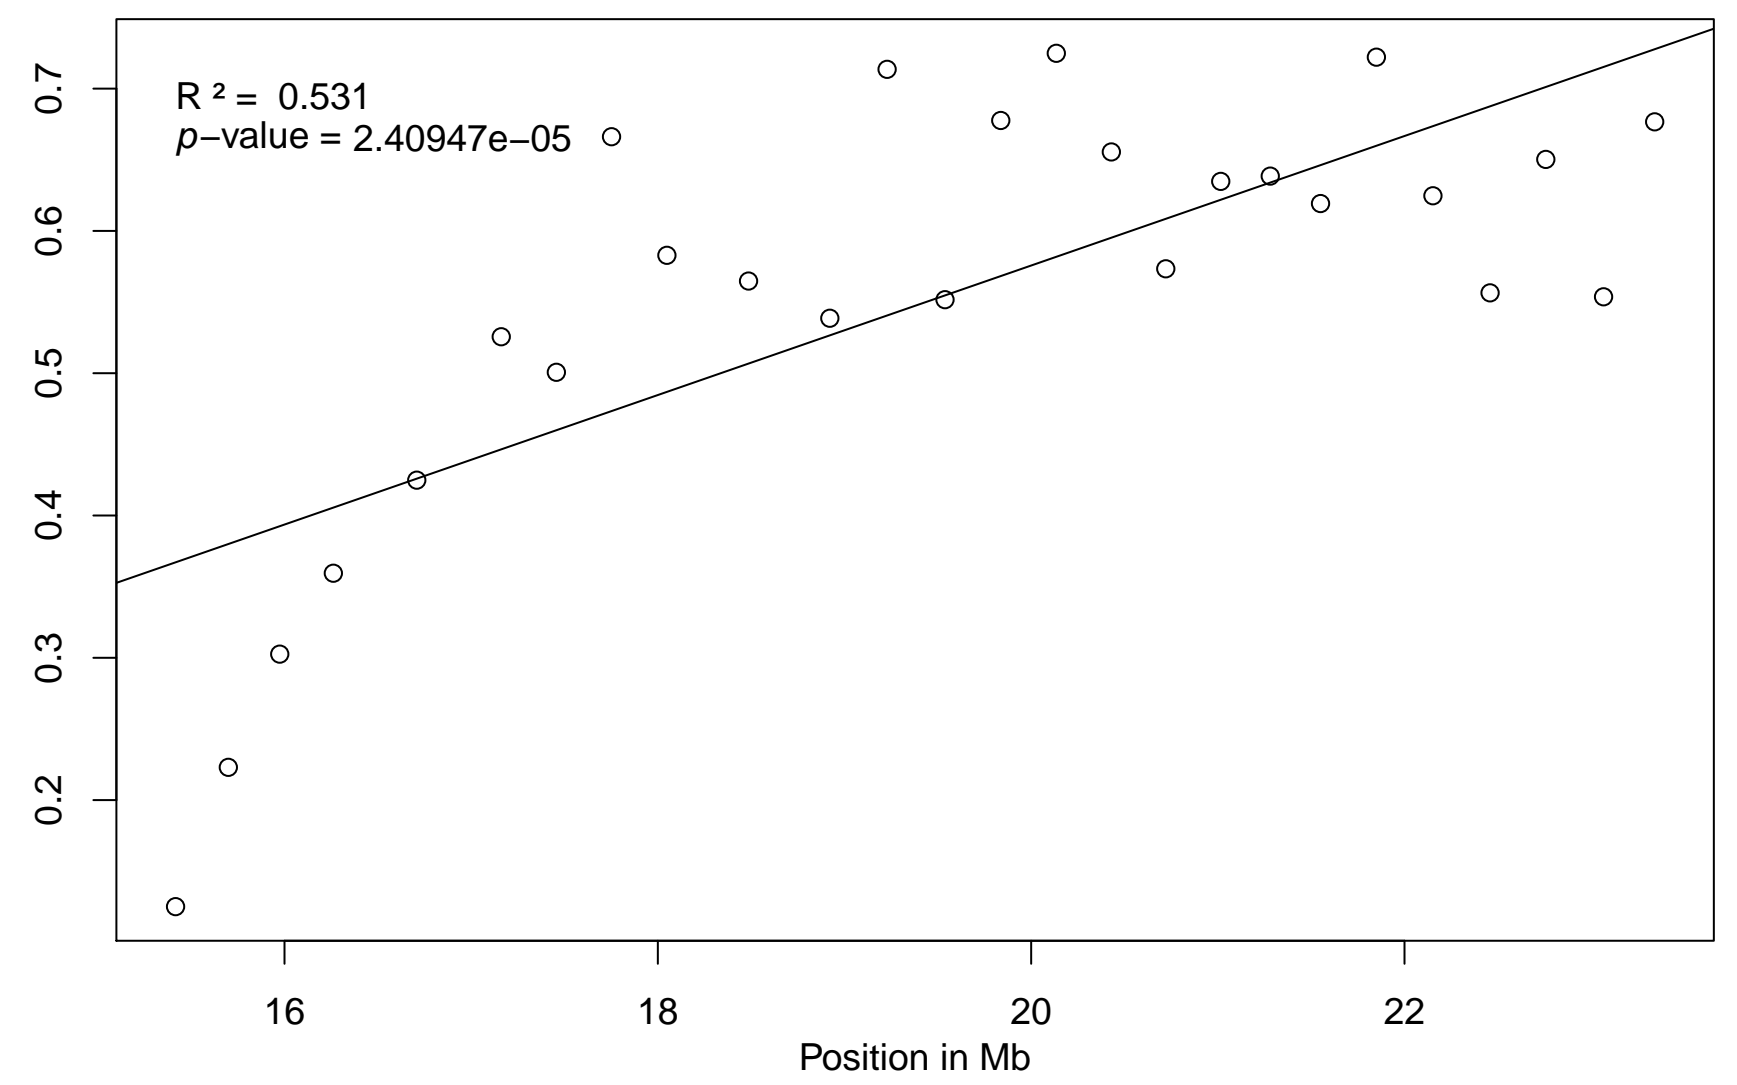**Chromosome 4 Gene density left arm**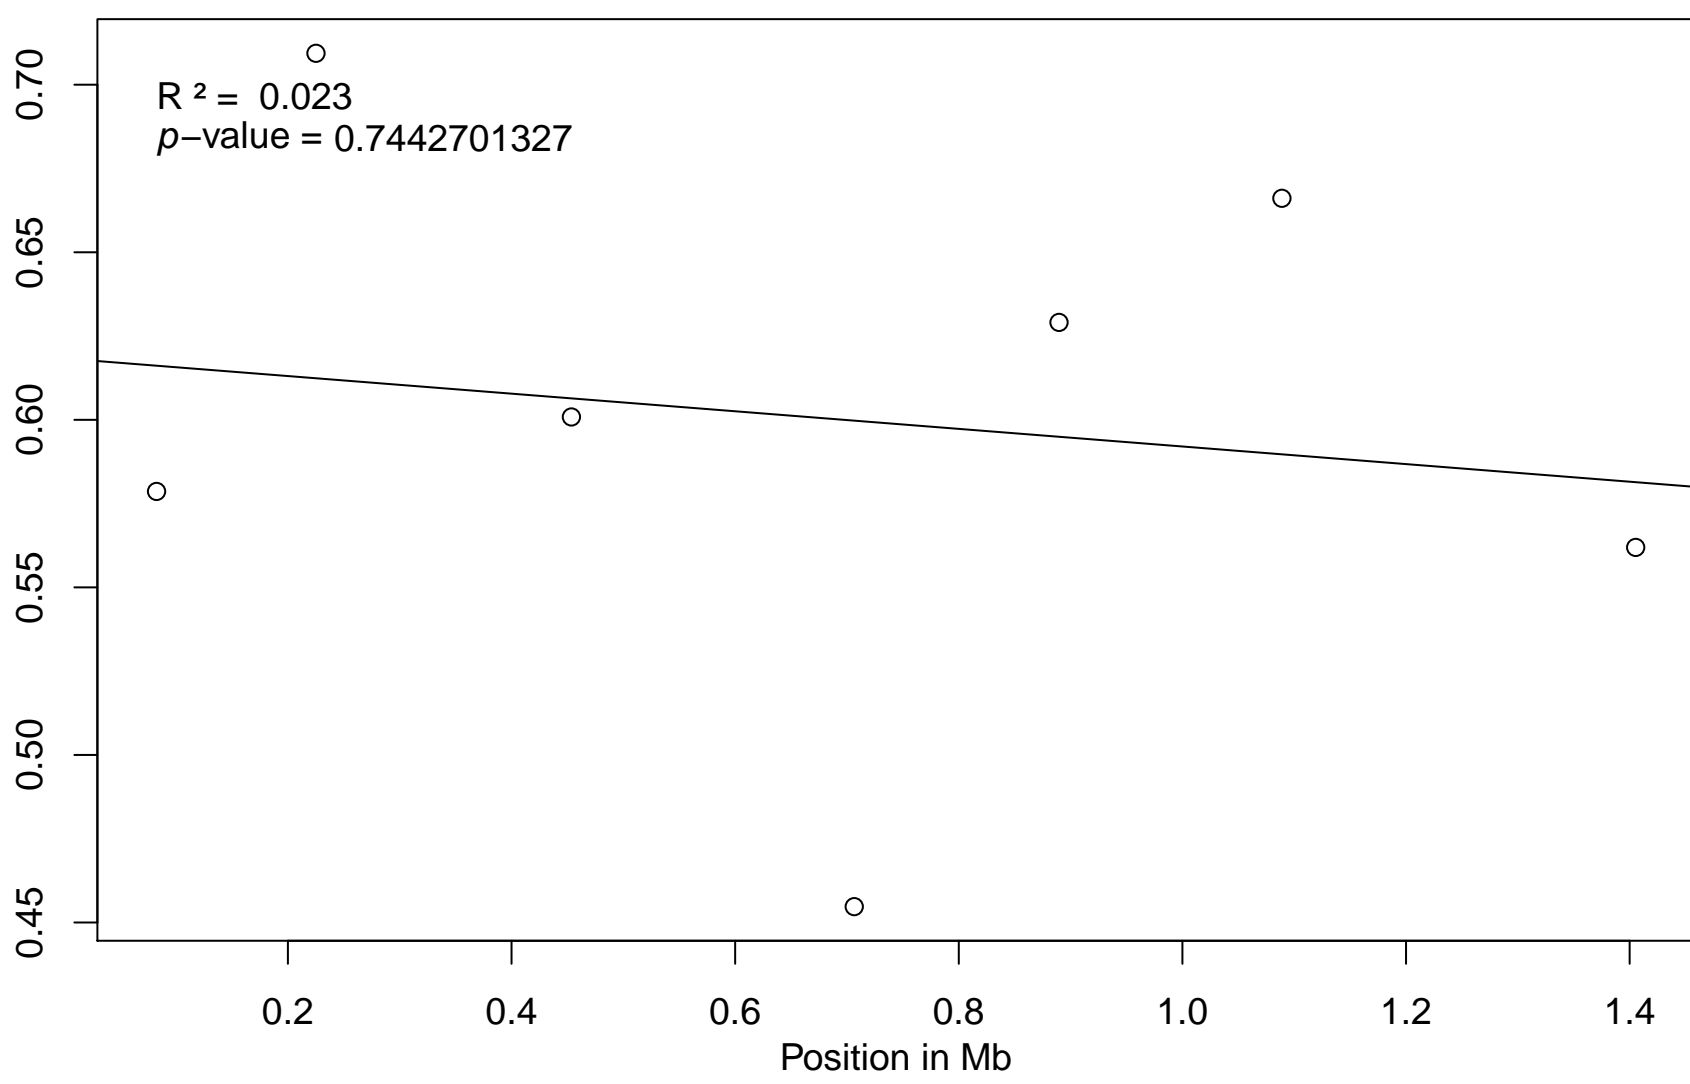**Chromosome 4 Gene density right arm**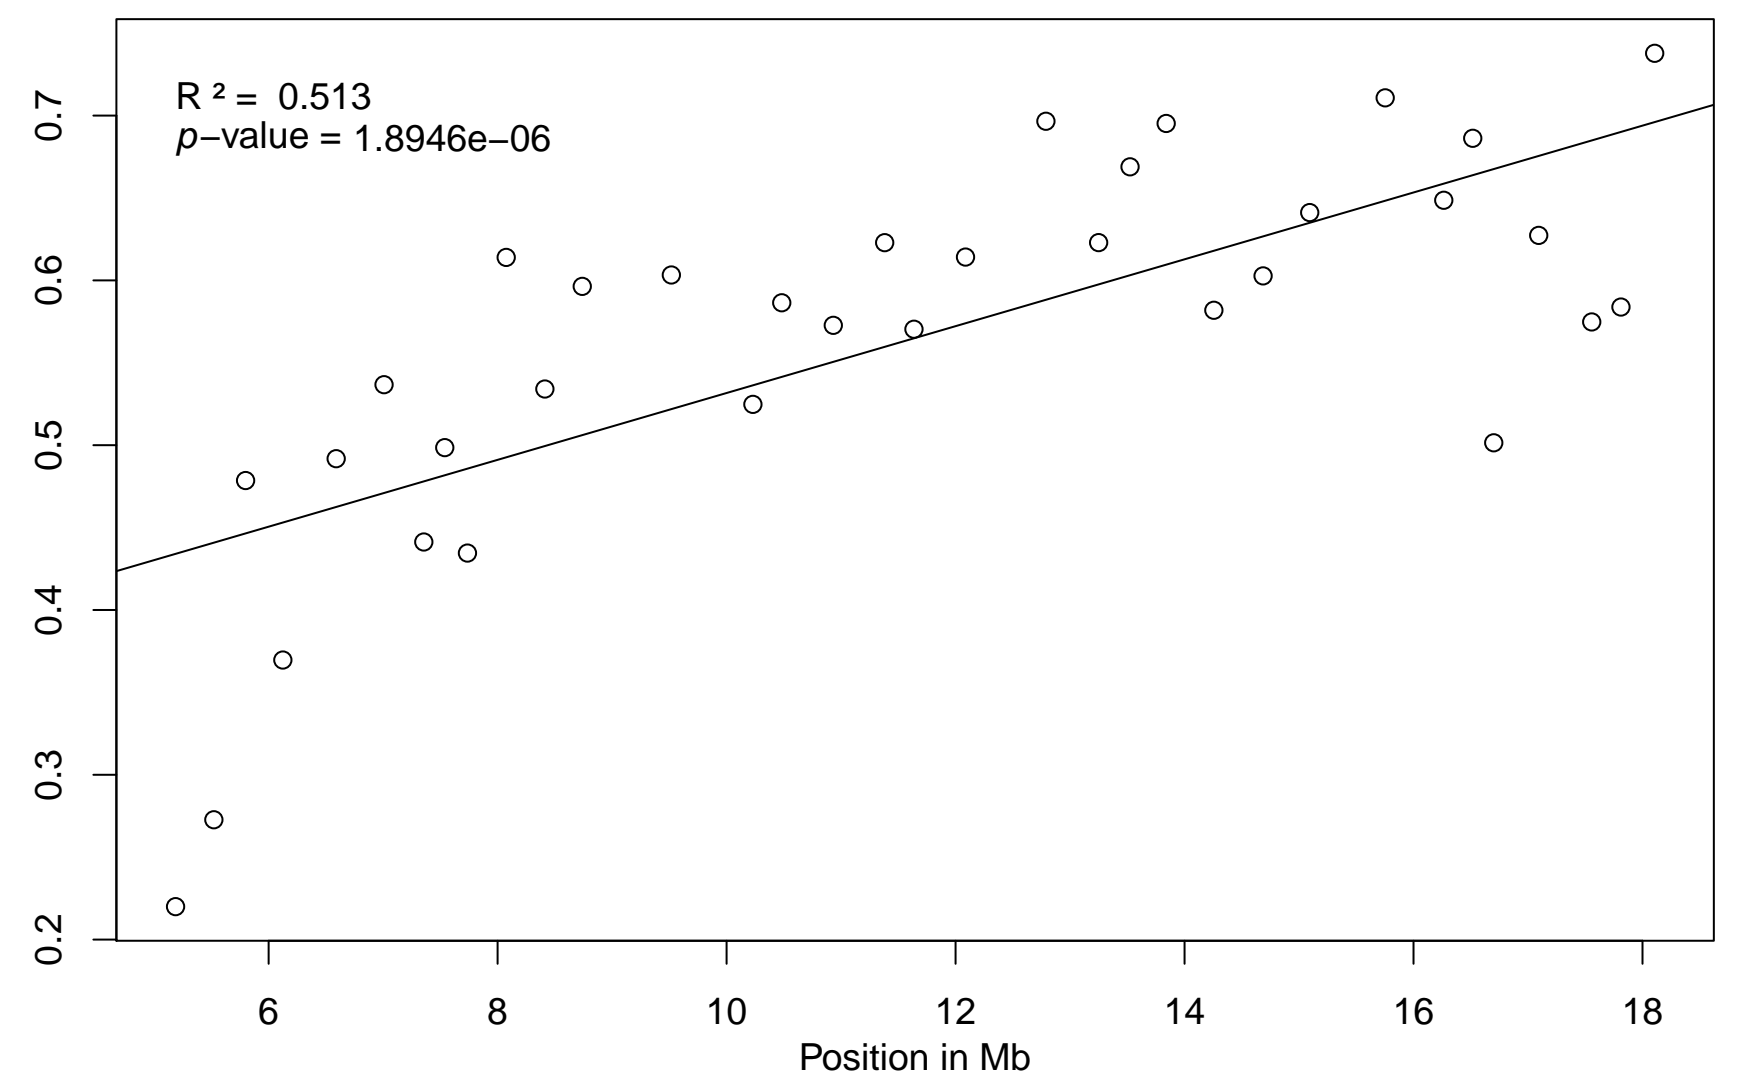**Chromosome 5 Gene density left arm**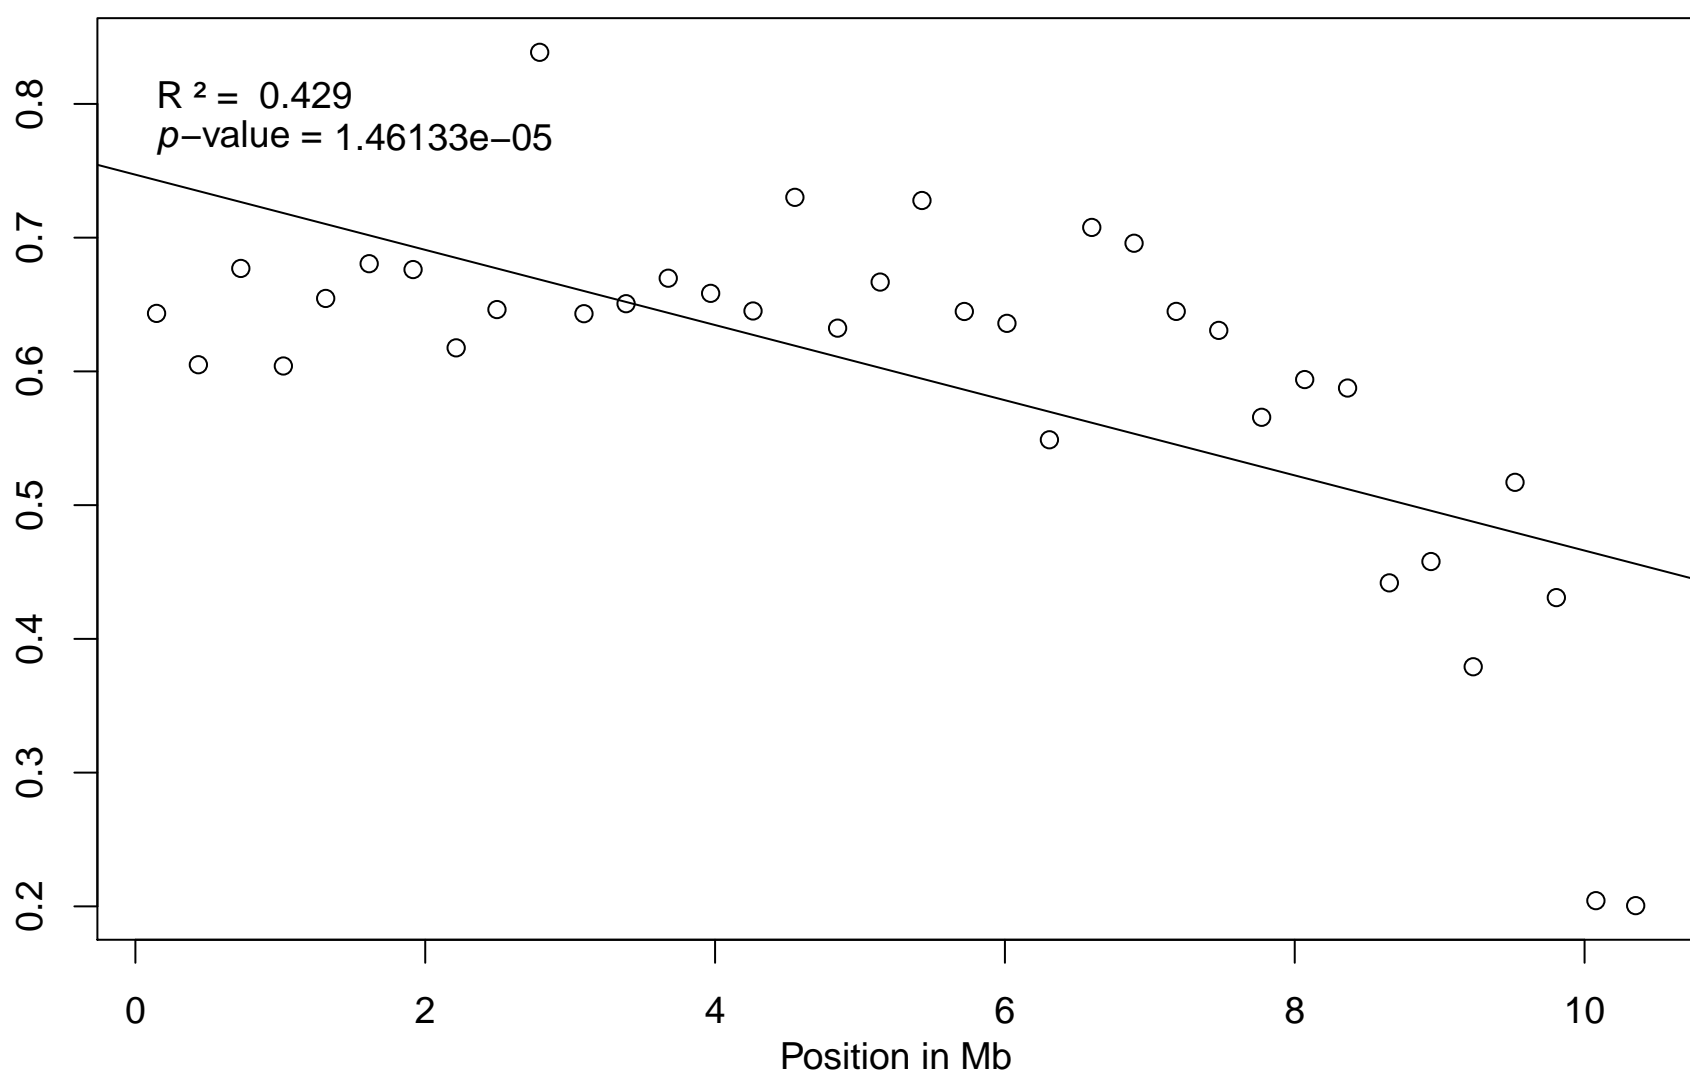**Chromosome 5 Gene density right arm**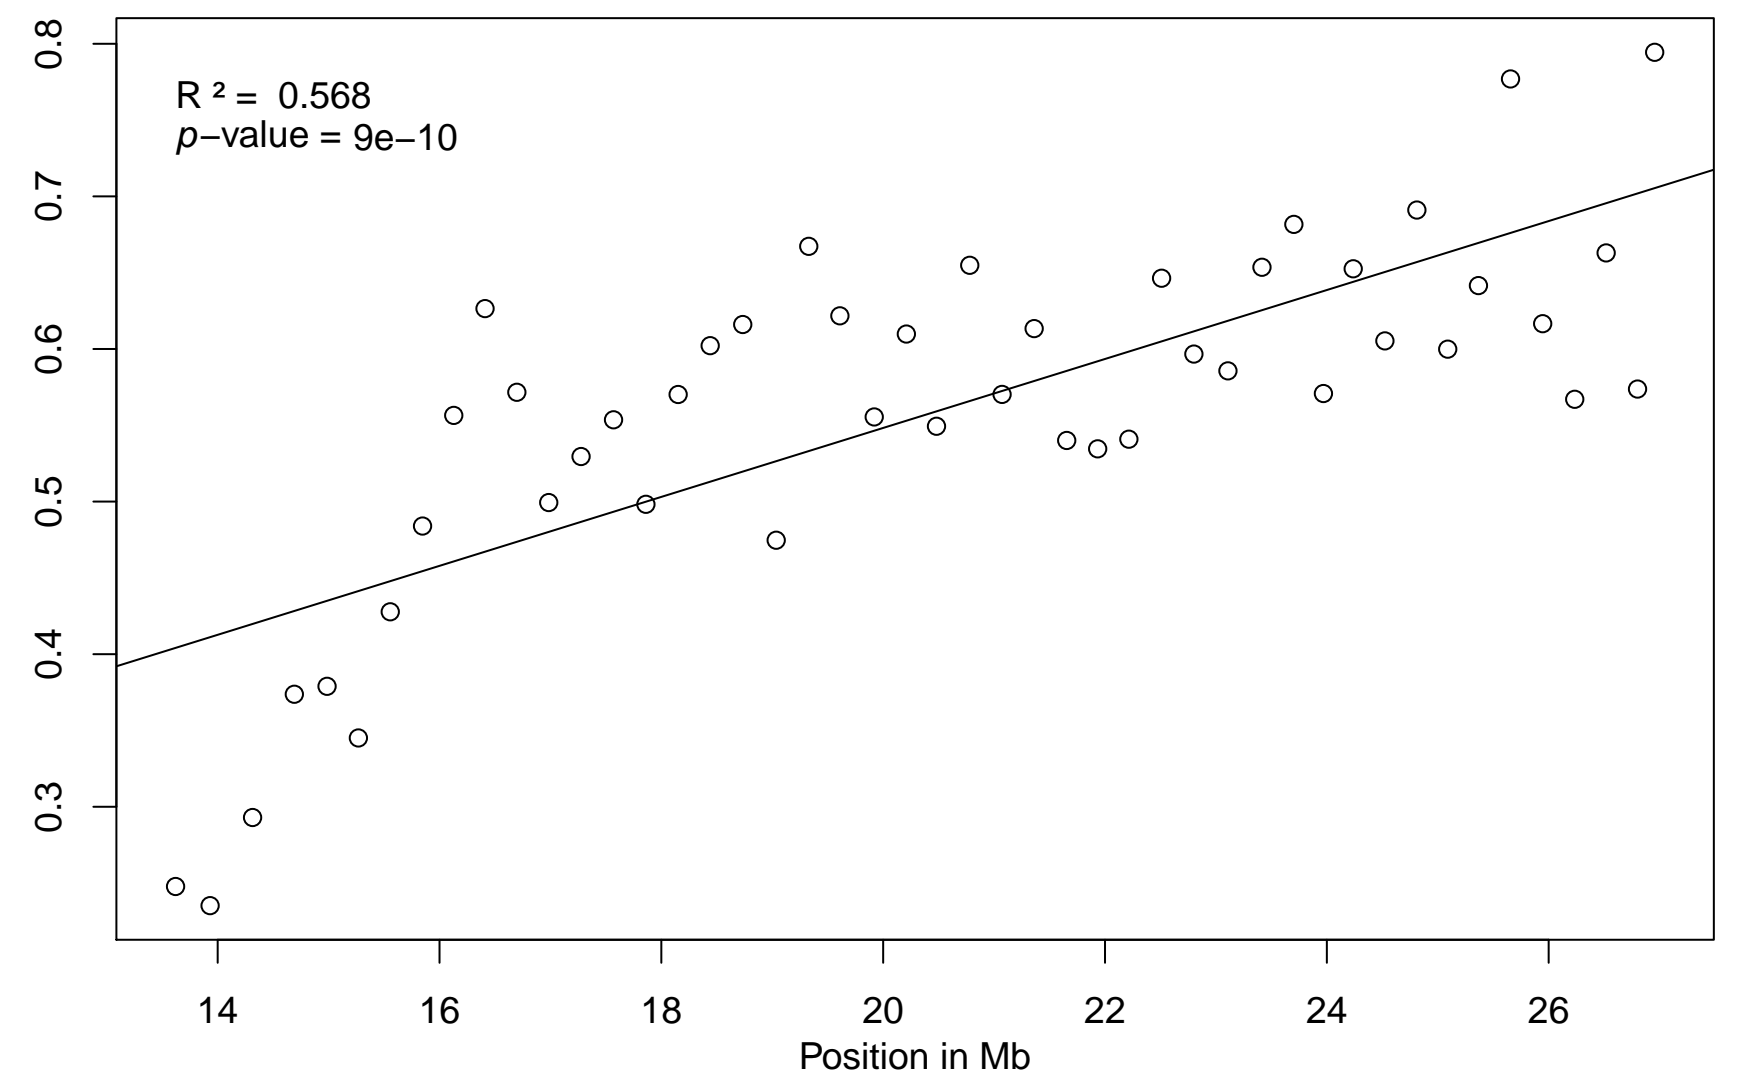

**Male Chr 1 removing 30 % of total length VALUES Gene density**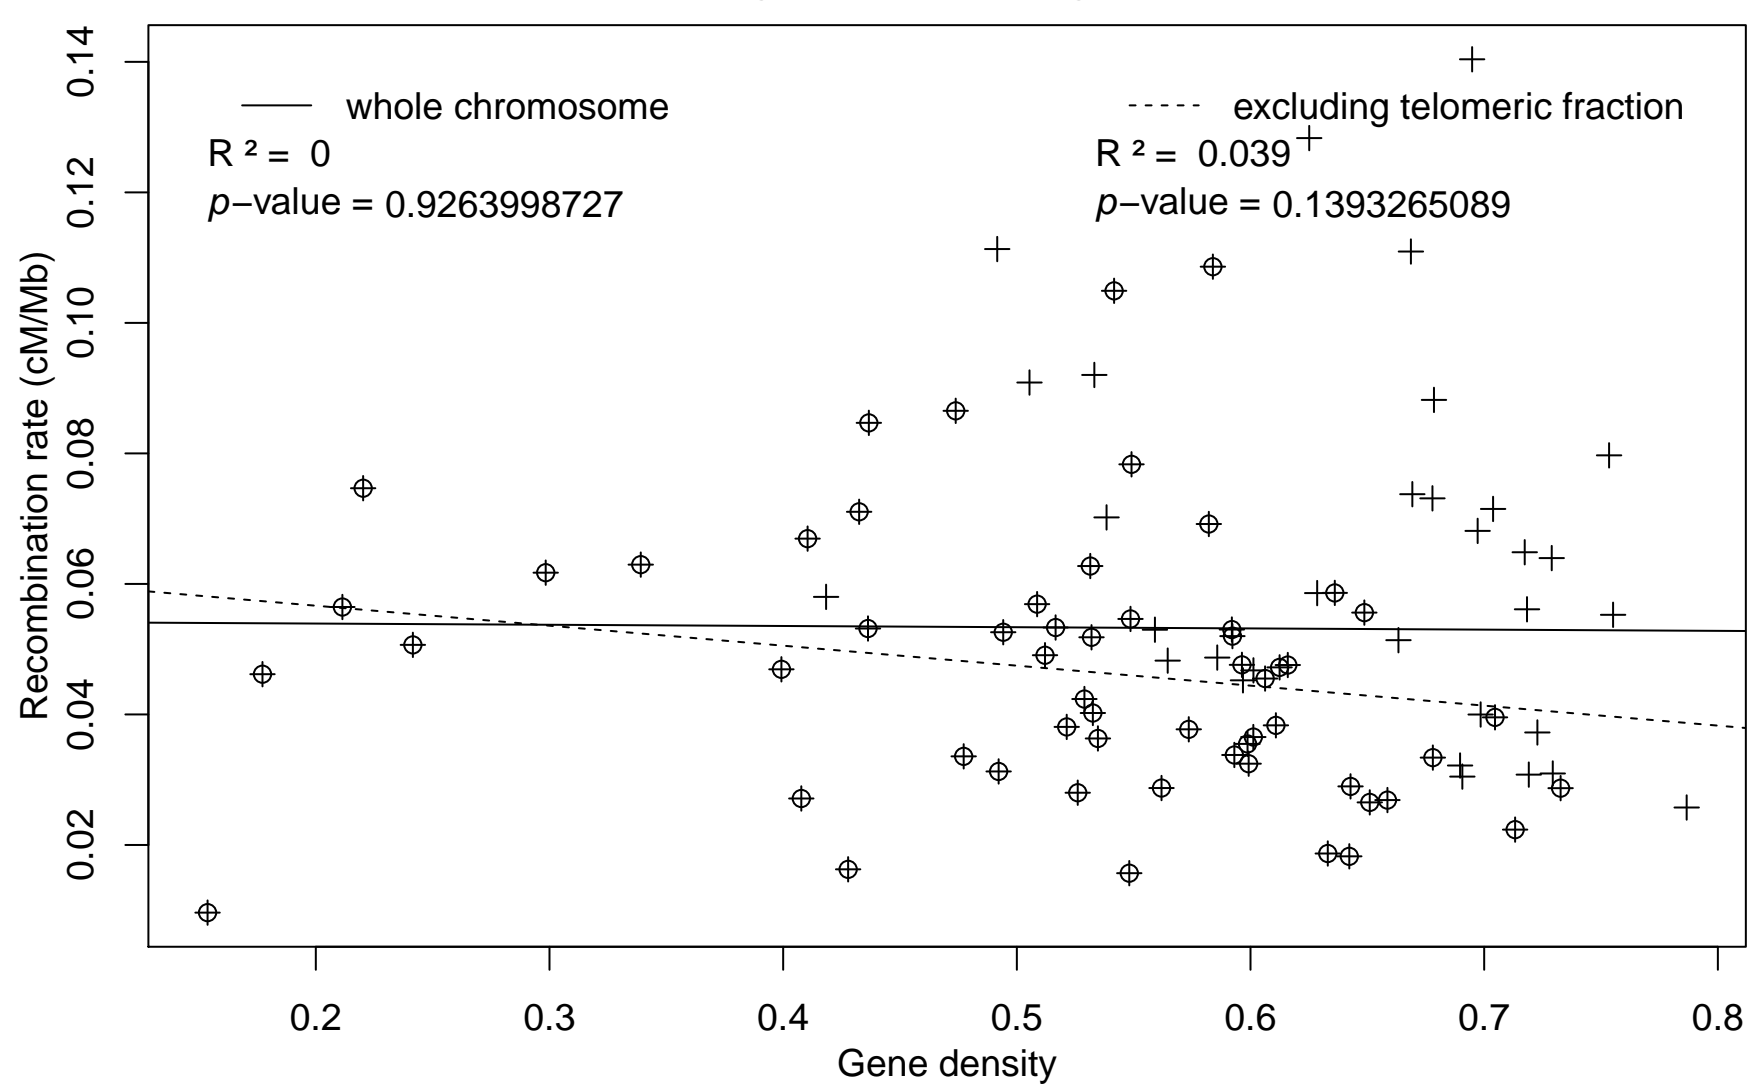**Female Chr 1 removing 30 % of total length VALUES Gene density**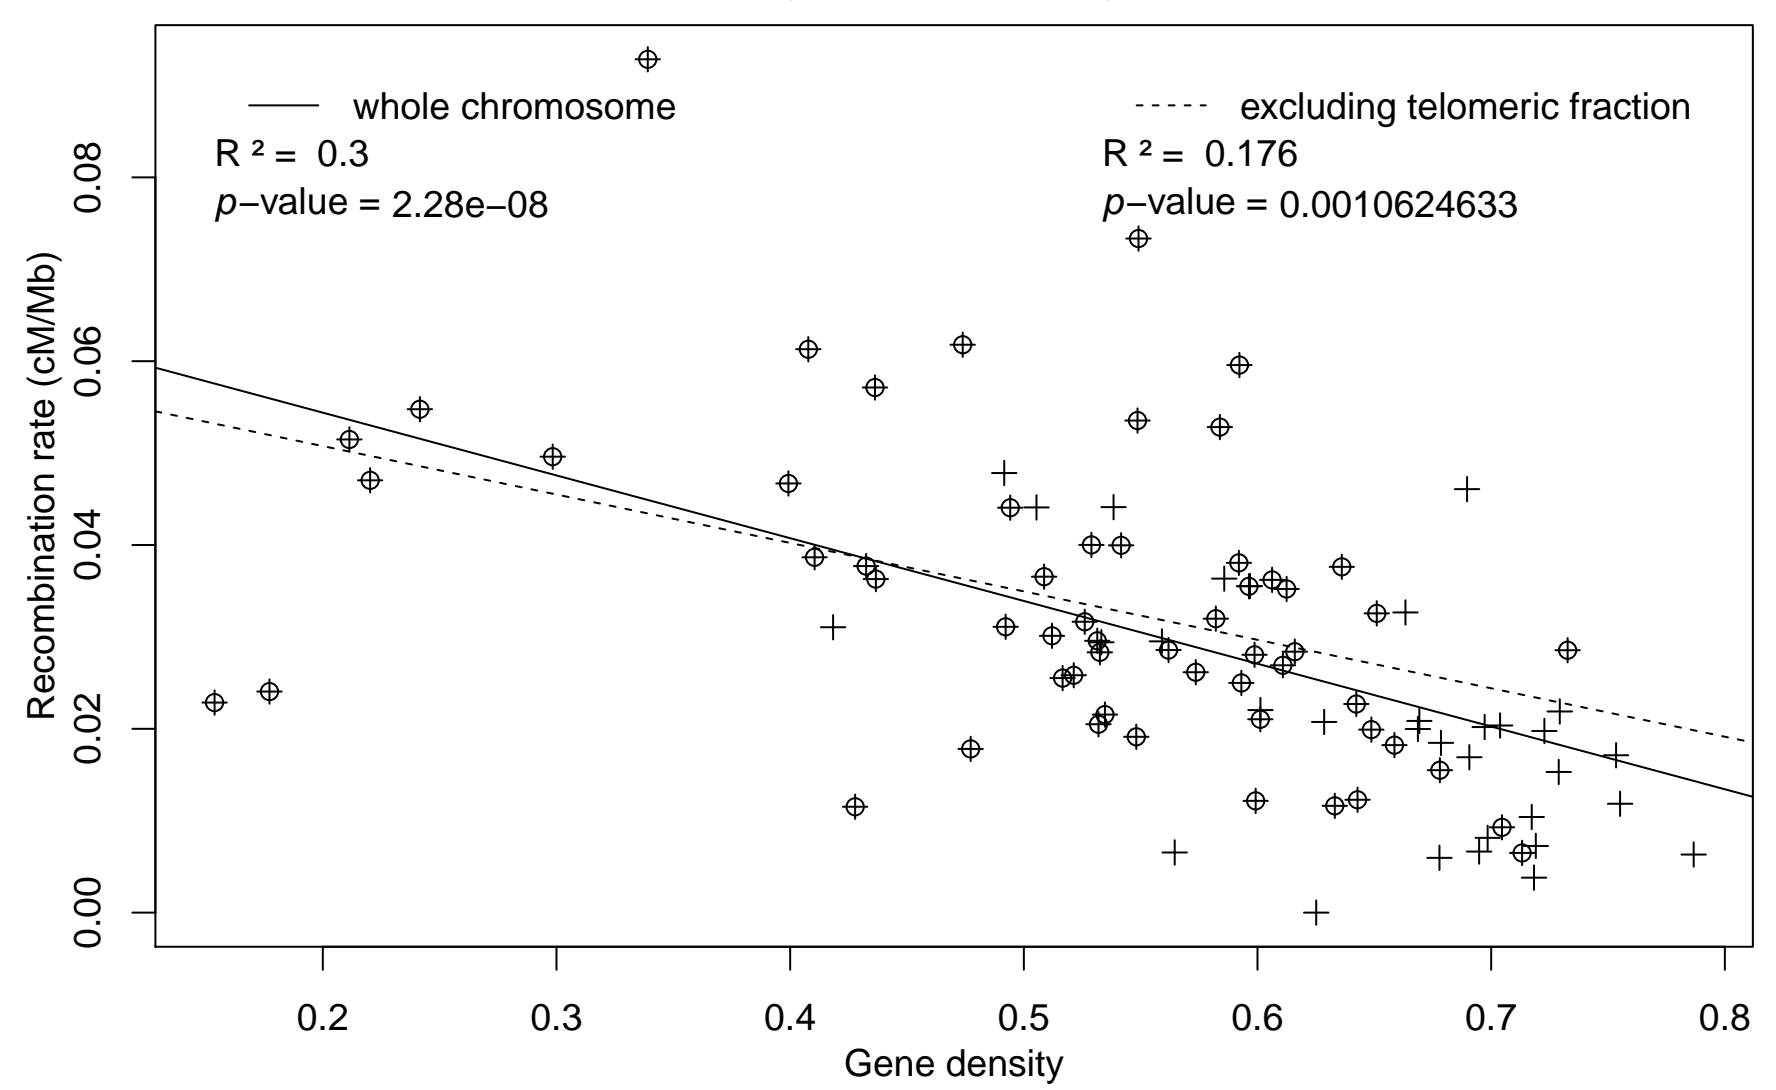**Male Chr 2 removing 30 % of total length VALUES Gene density**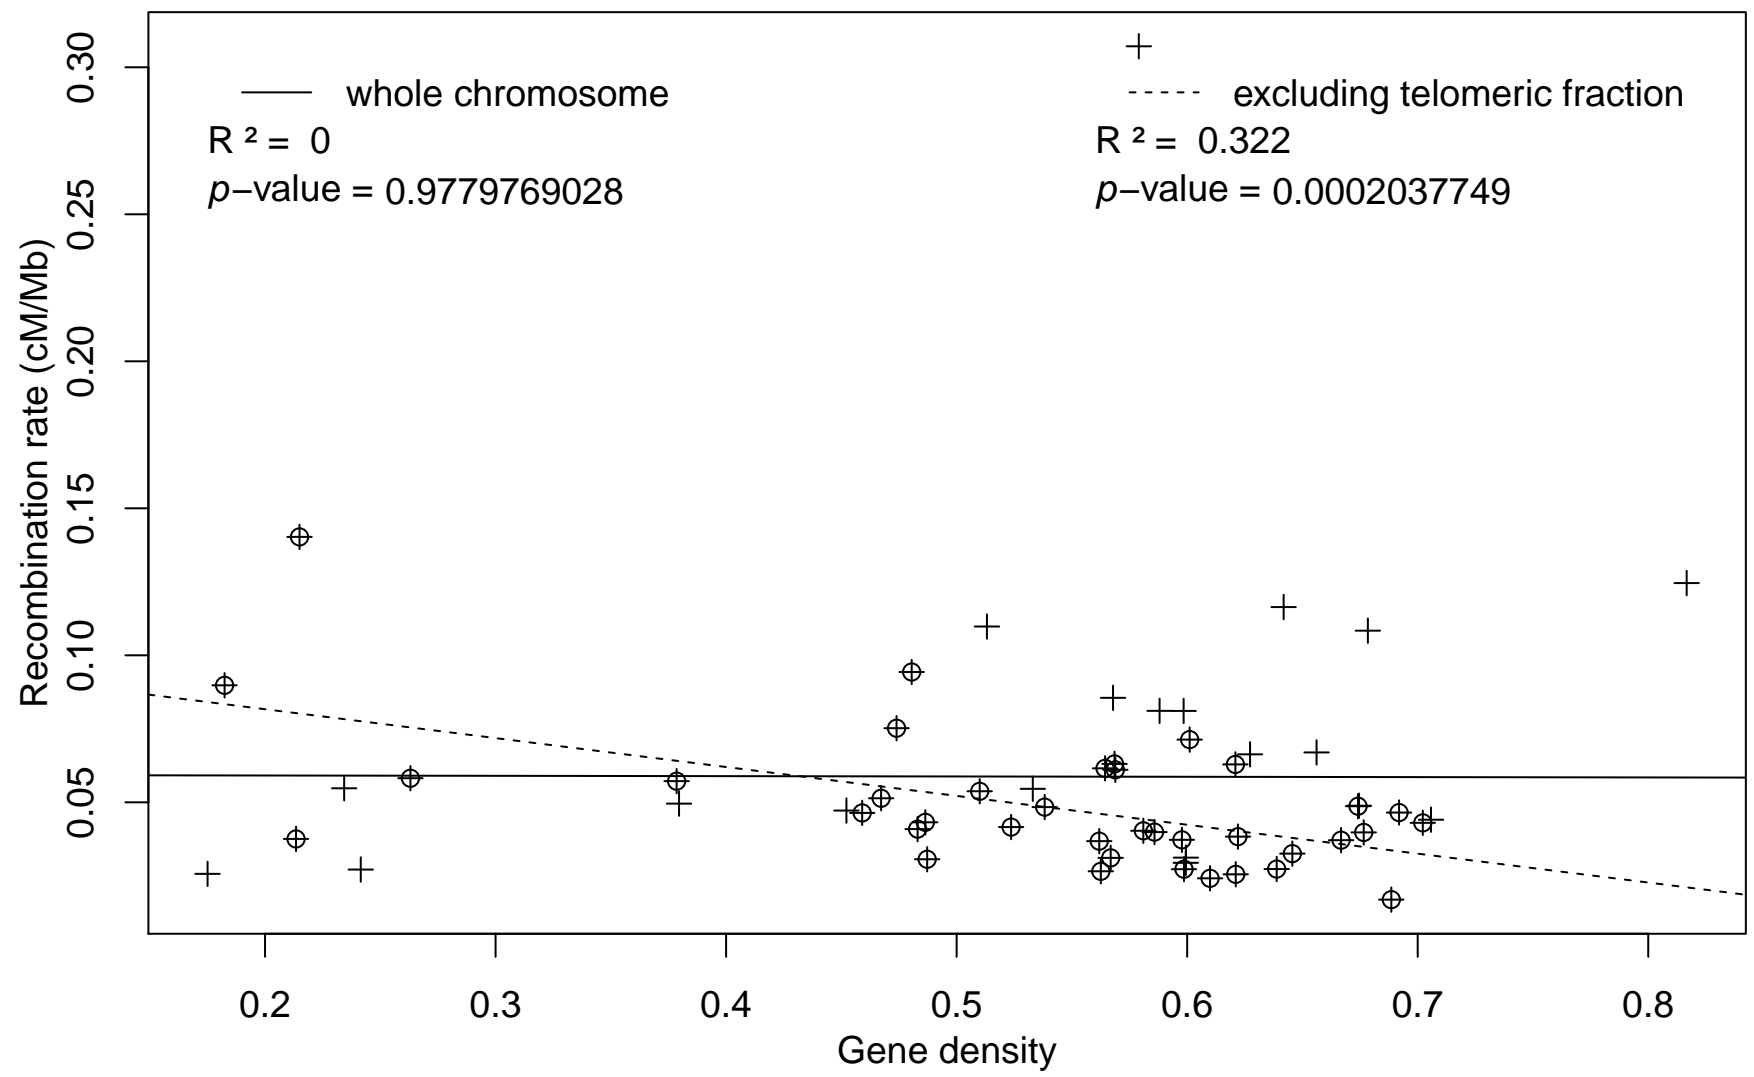**Female Chr 2 removing 30 % of total length VALUES Gene density**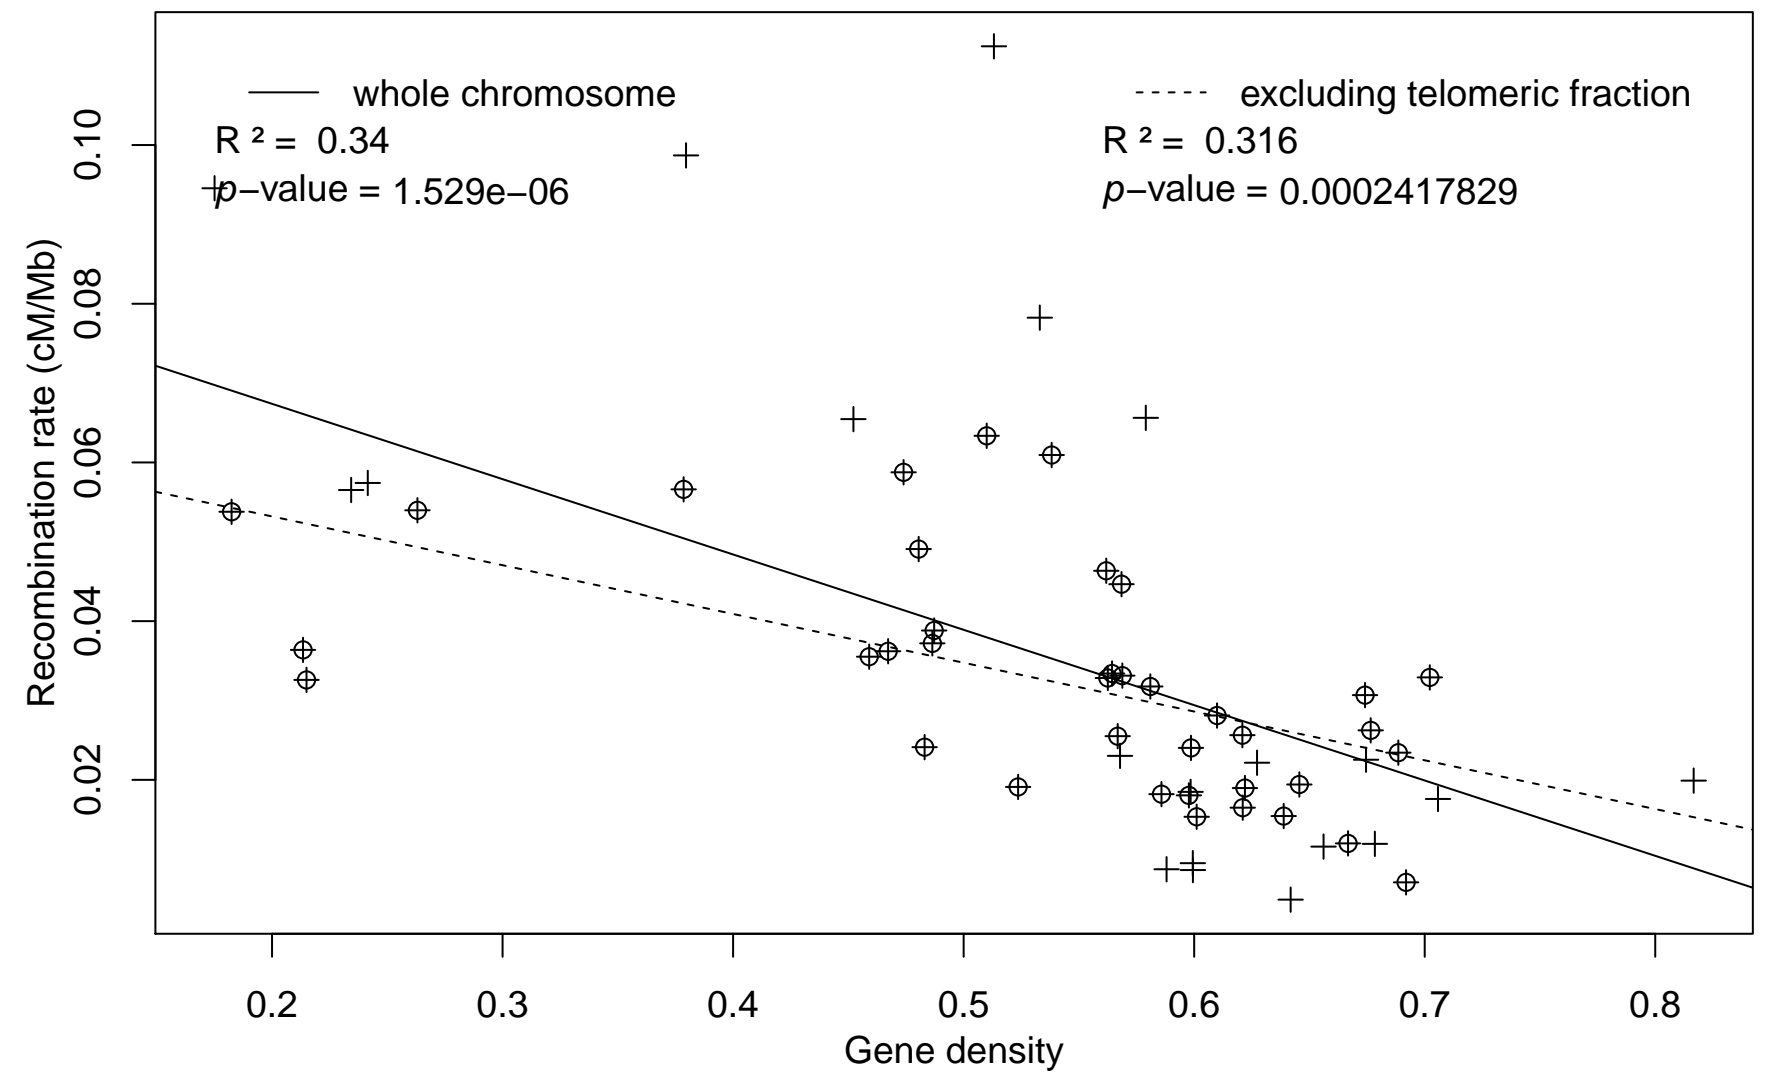**Male Chr 3 removing 30 % of total length VALUES Gene density**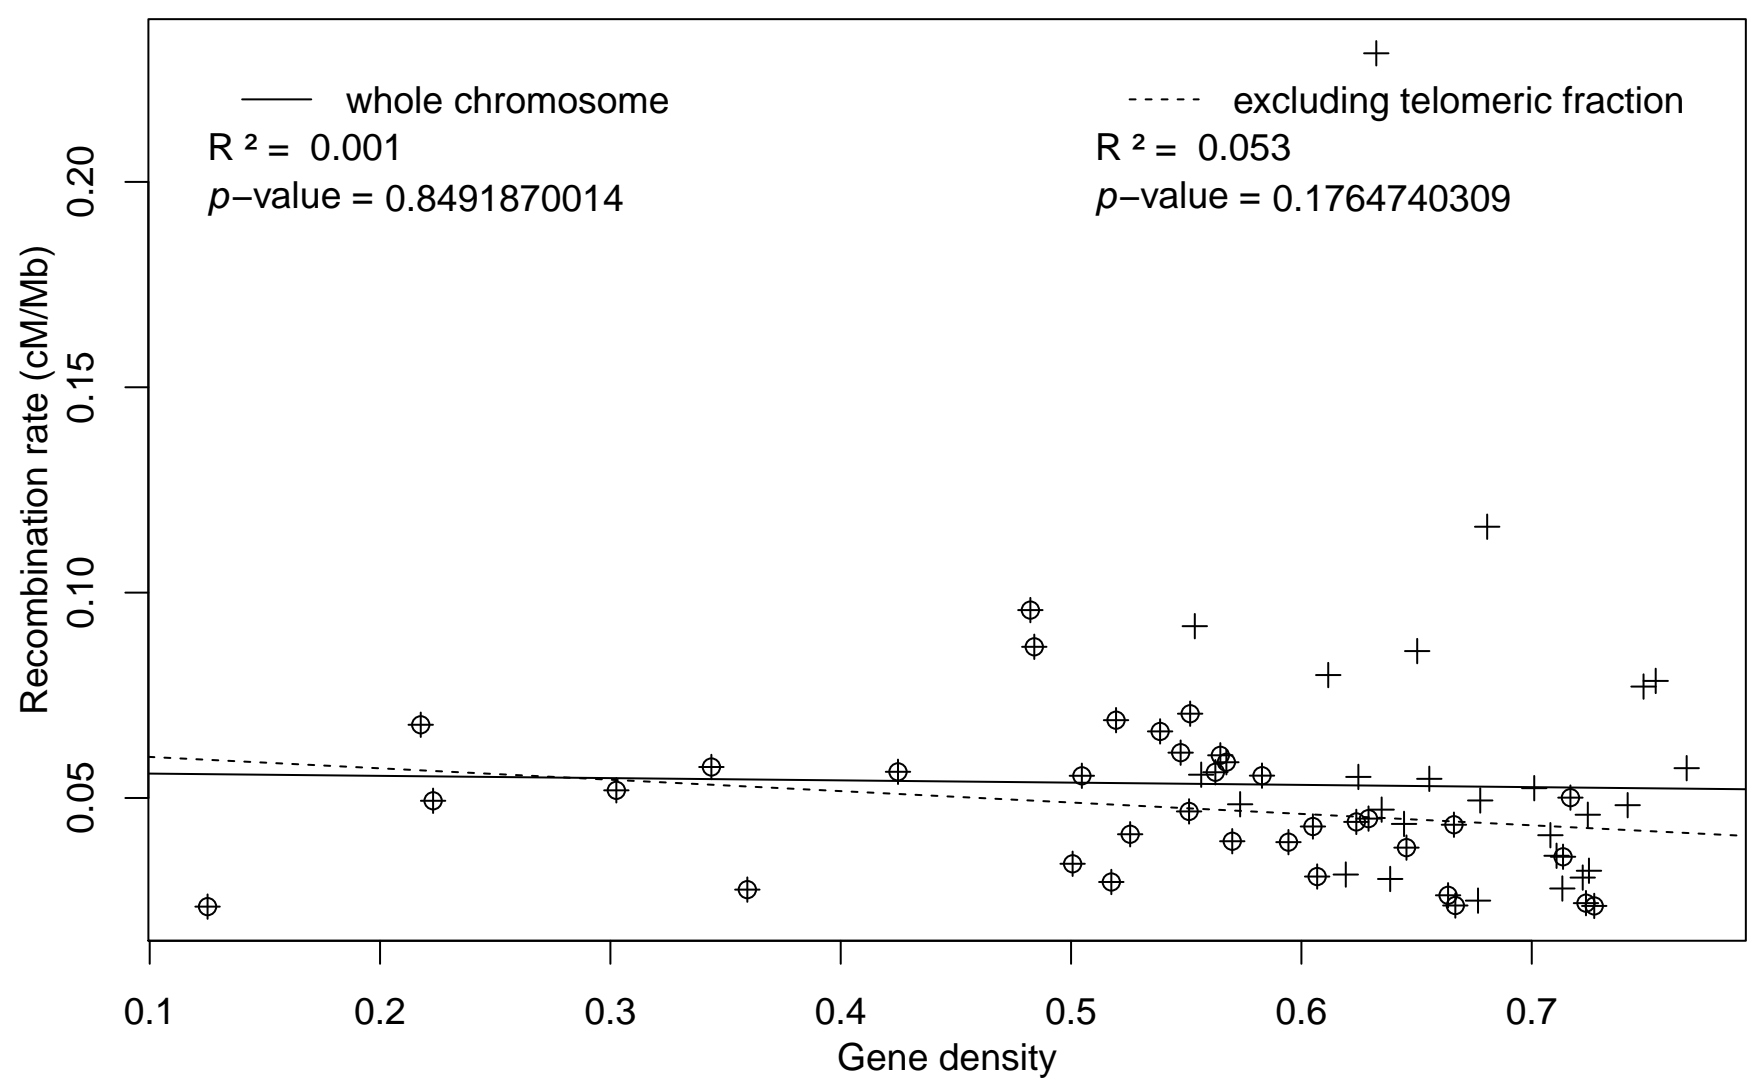**Female Chr 3 removing 30 % of total length VALUES Gene density**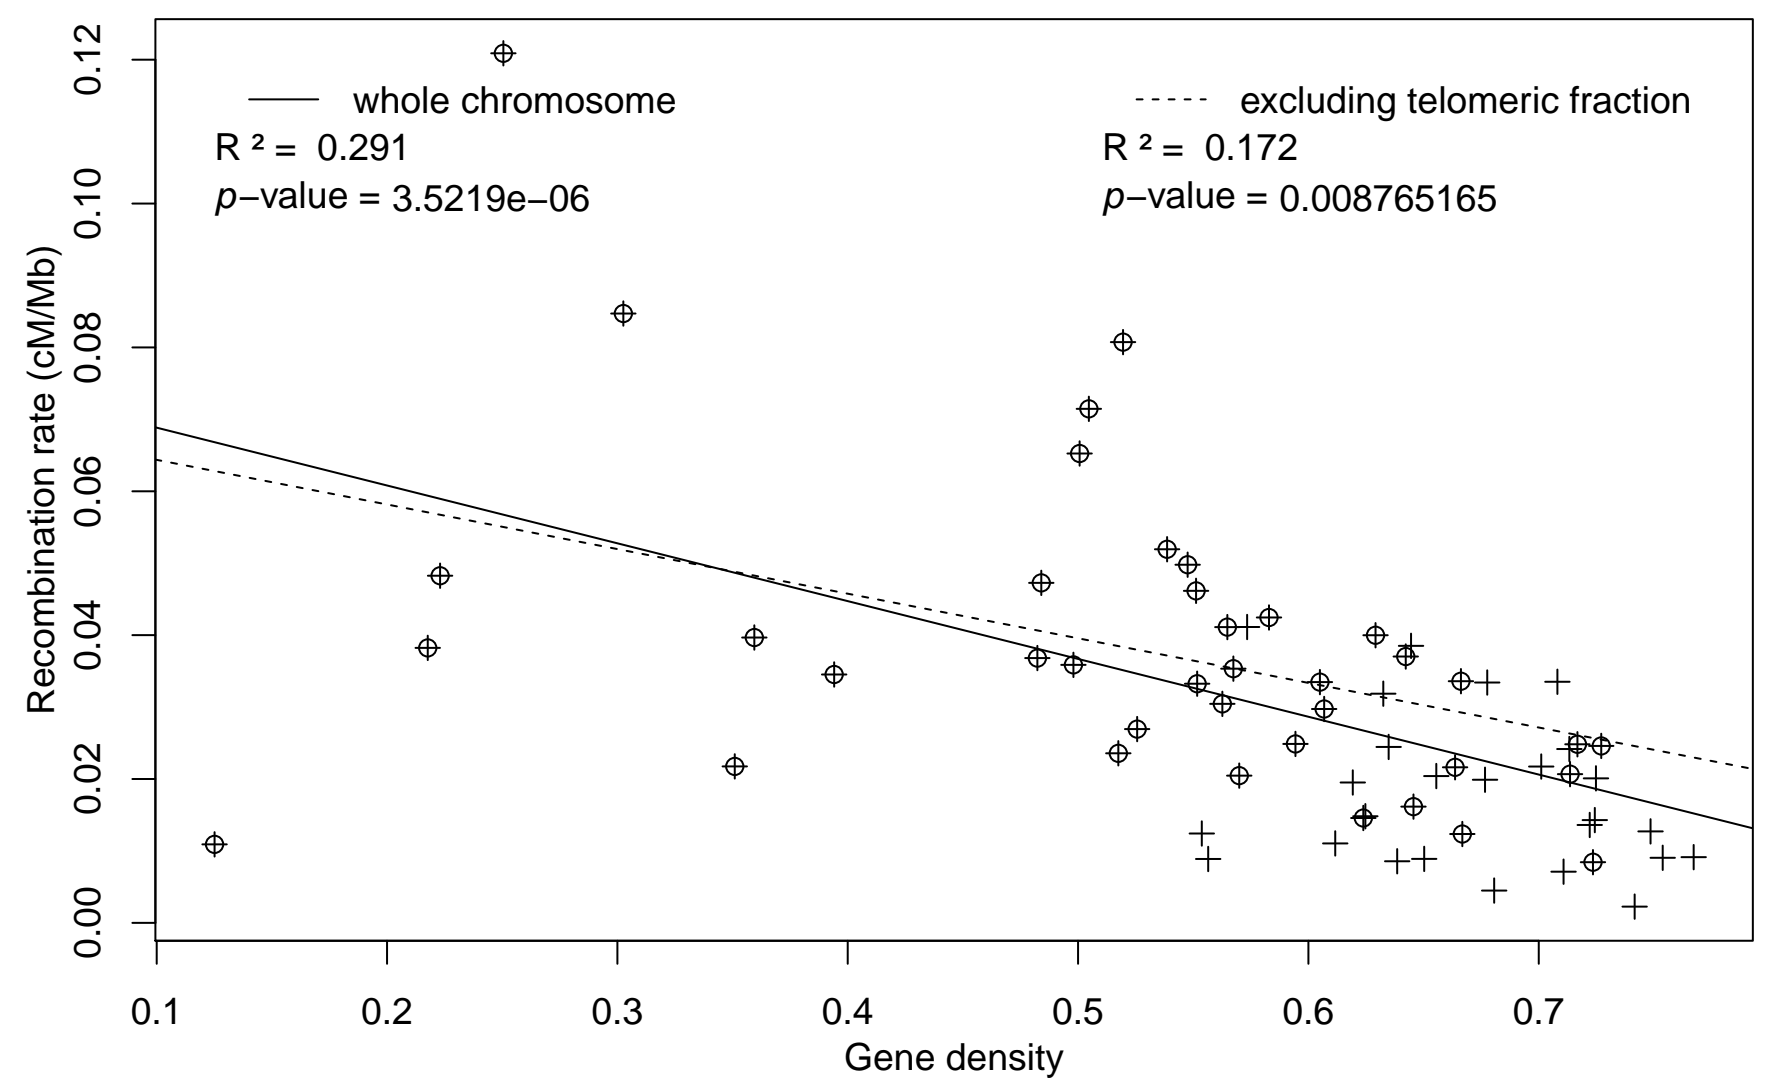**Male Chr 4 removing 30 % of total length VALUES Gene density**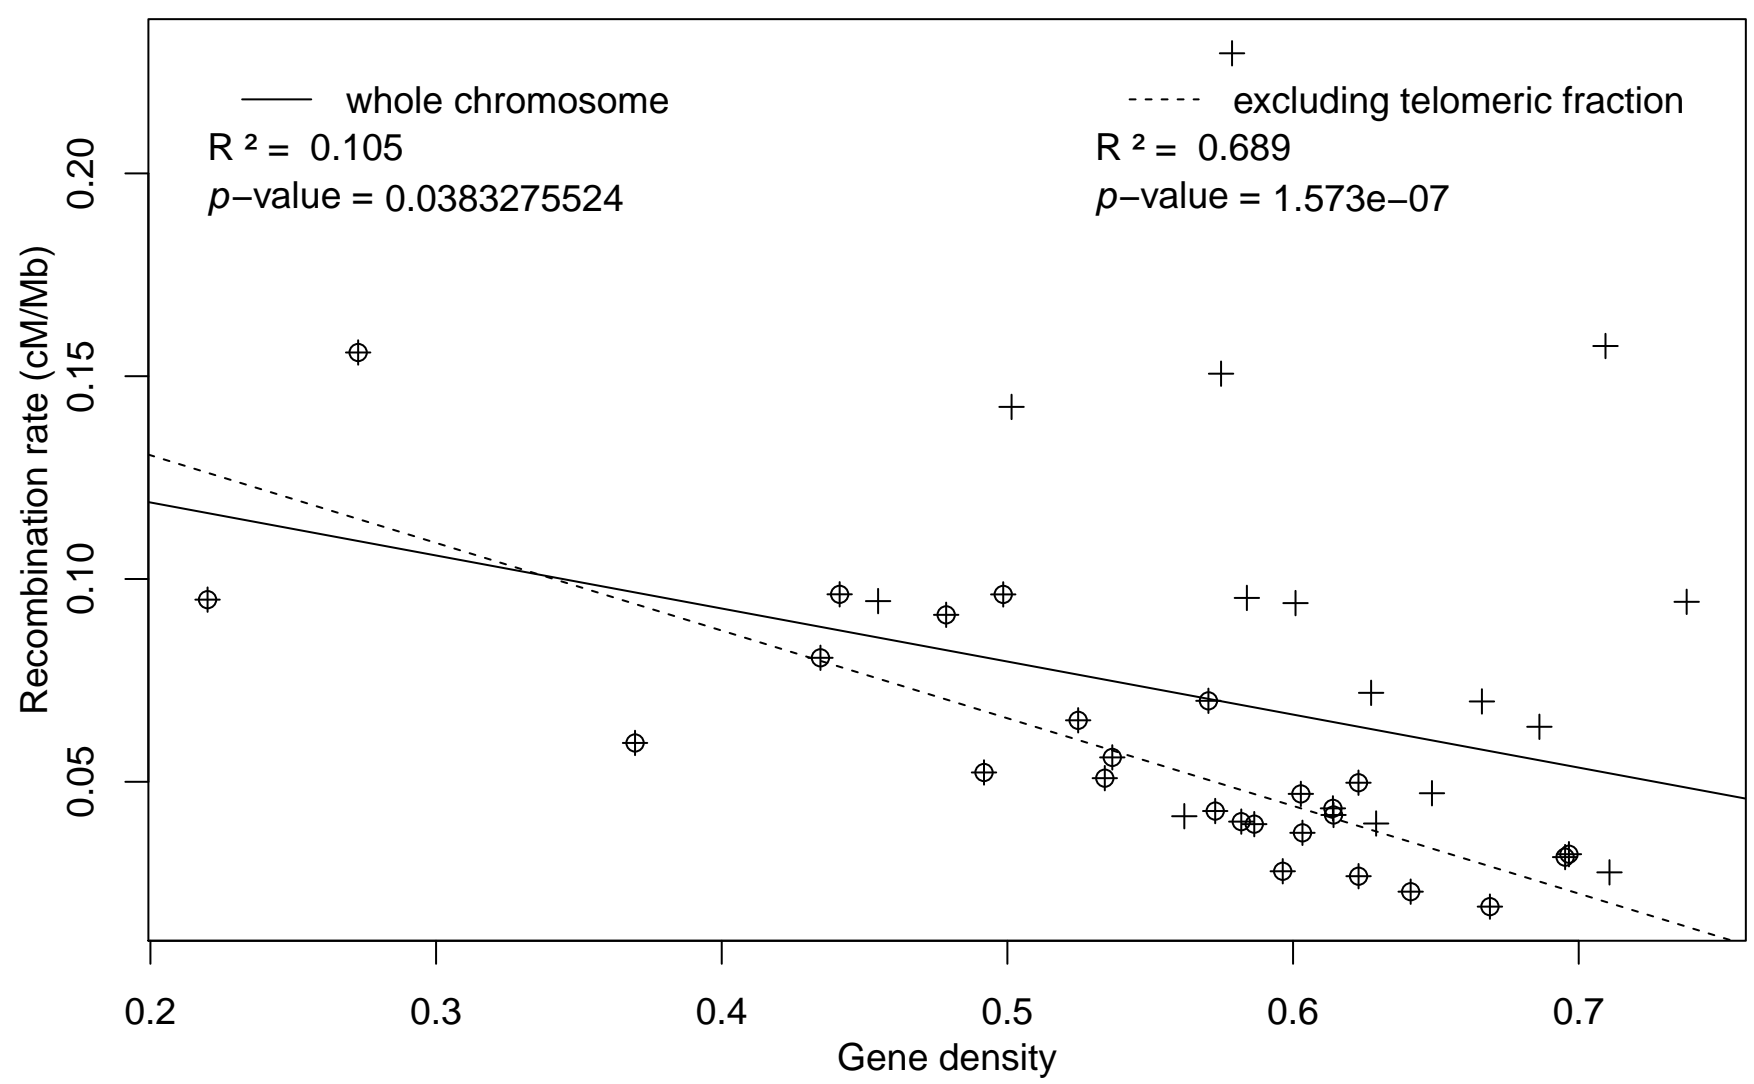**Female Chr 4 removing 30 % of total length VALUES Gene density**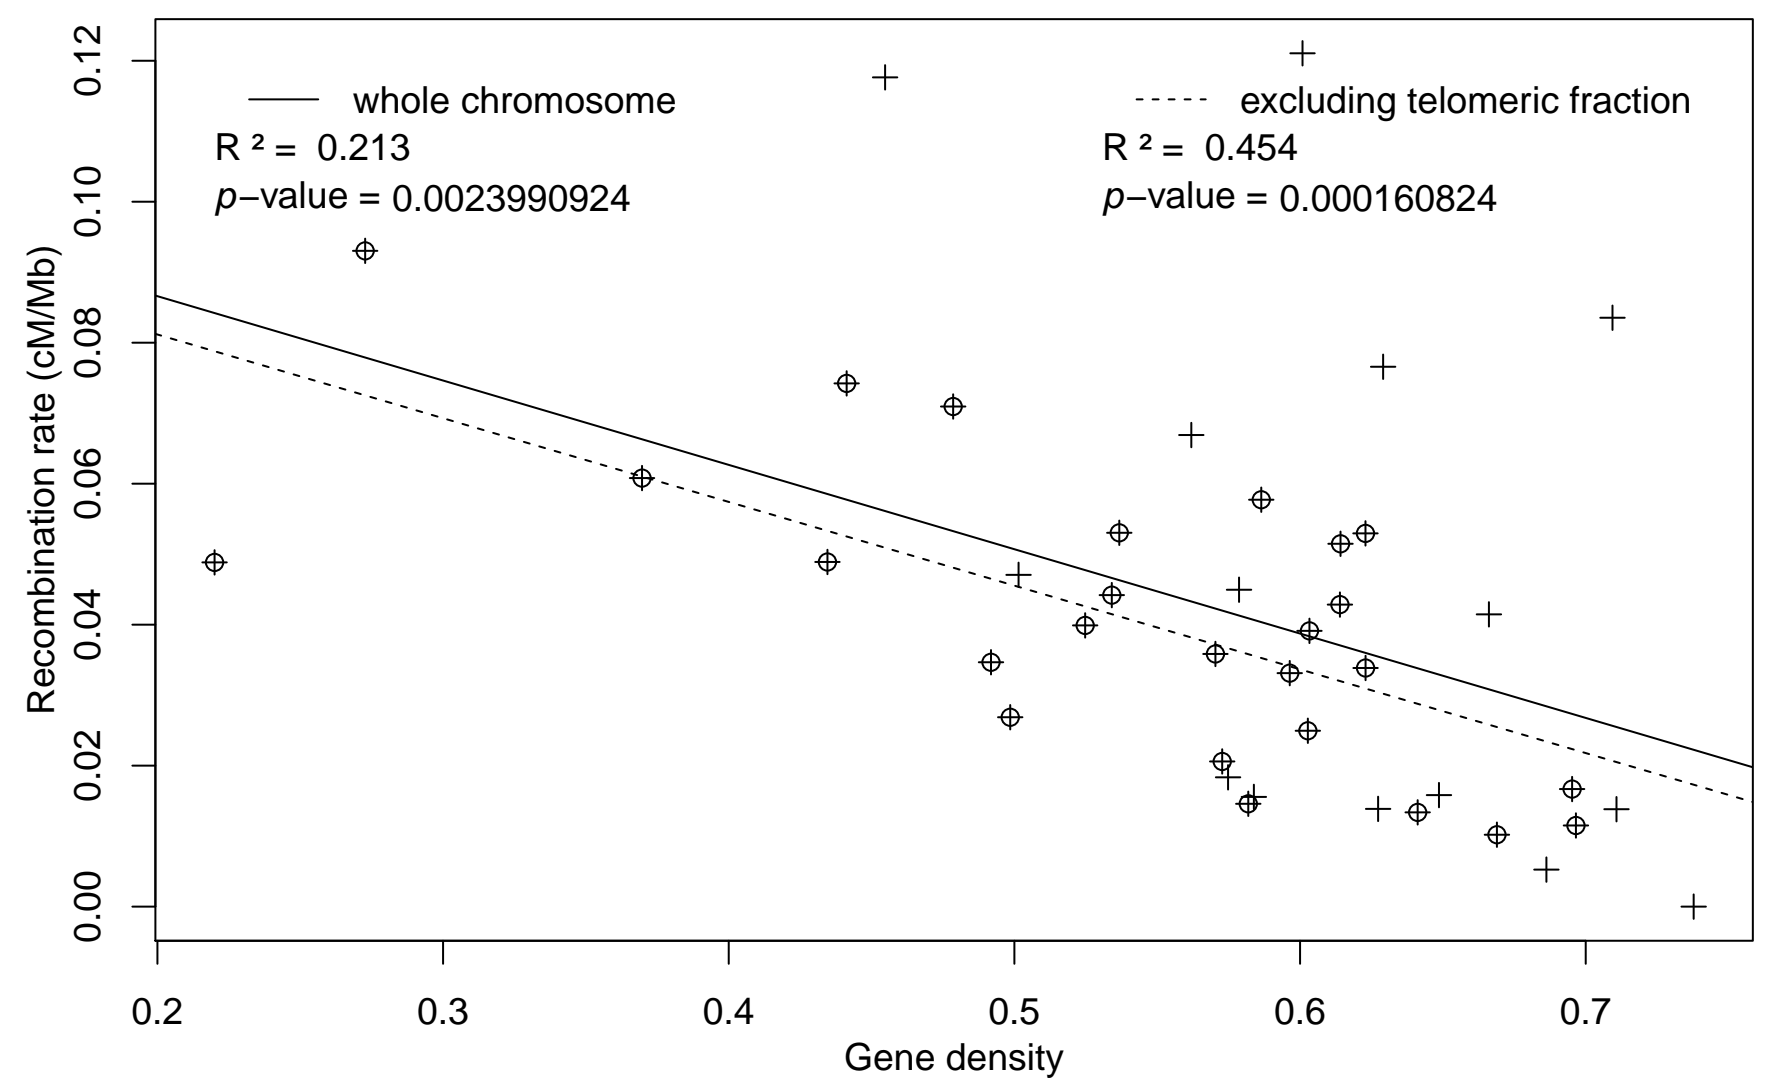**Male Chr 5 removing 30 % of total length VALUES Gene density**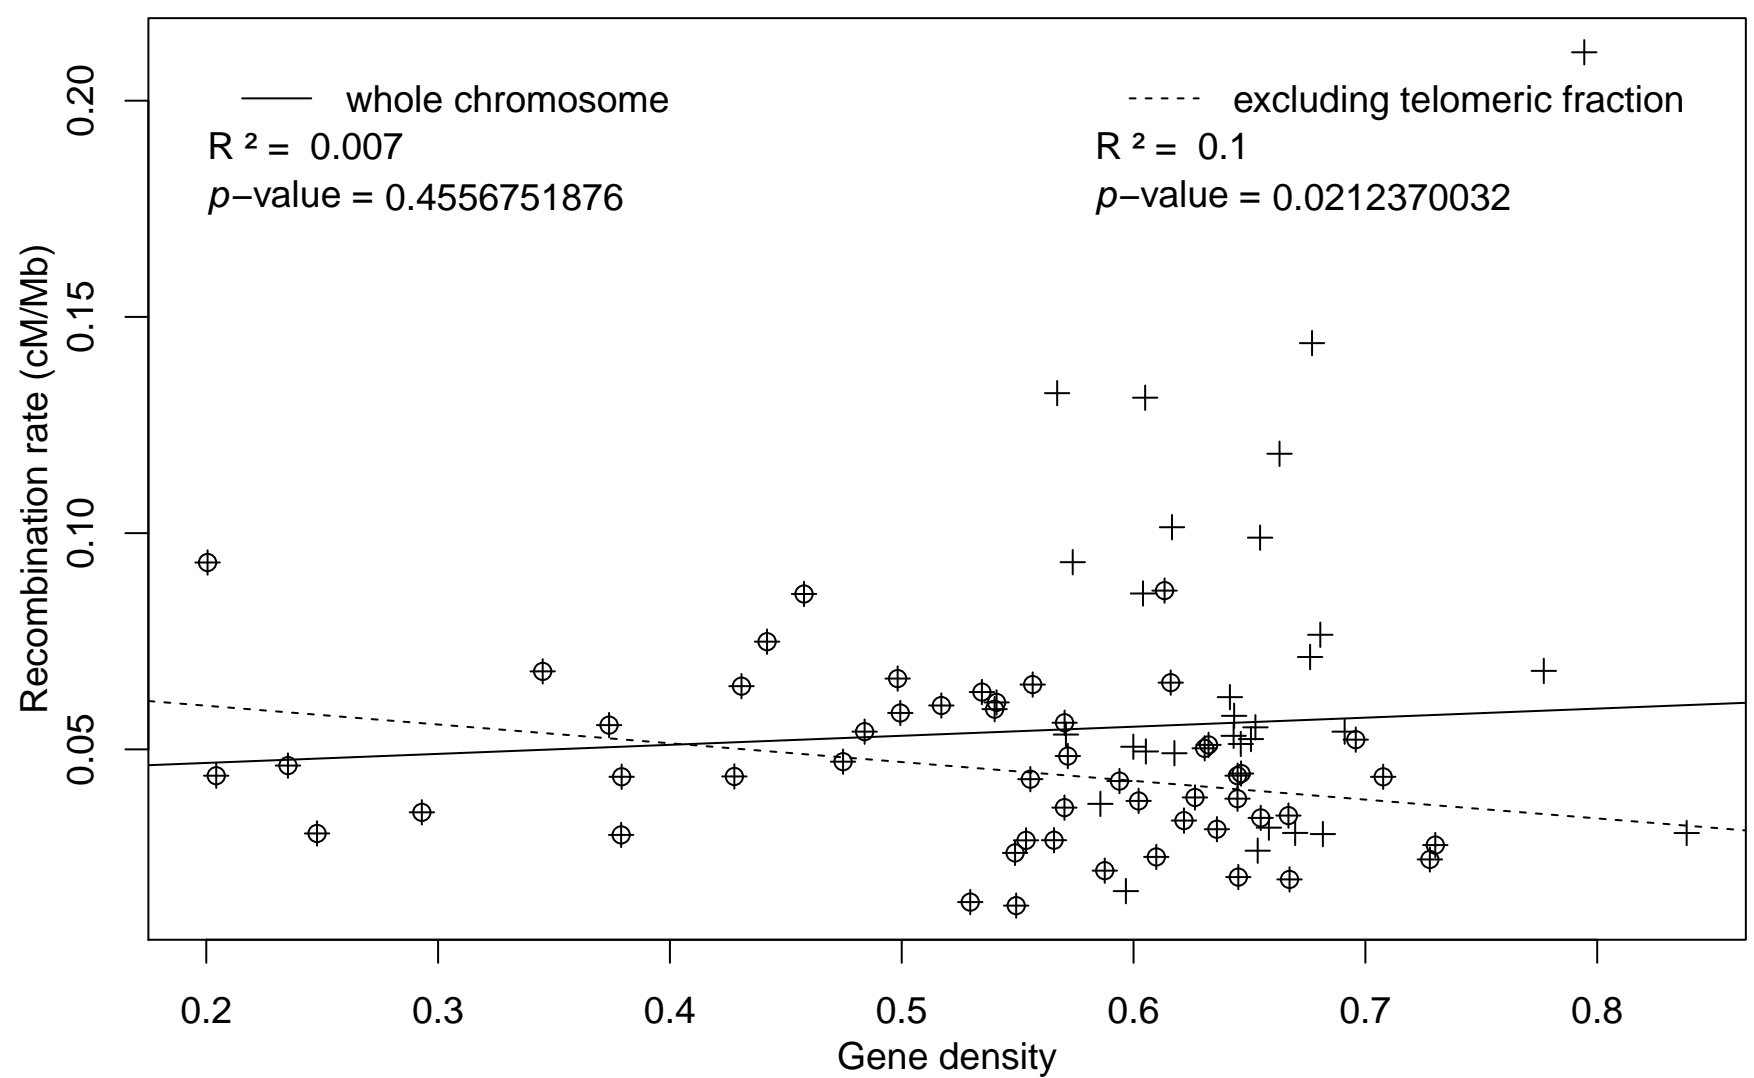**Female Chr 5 removing 30 % of total length VALUES Gene density**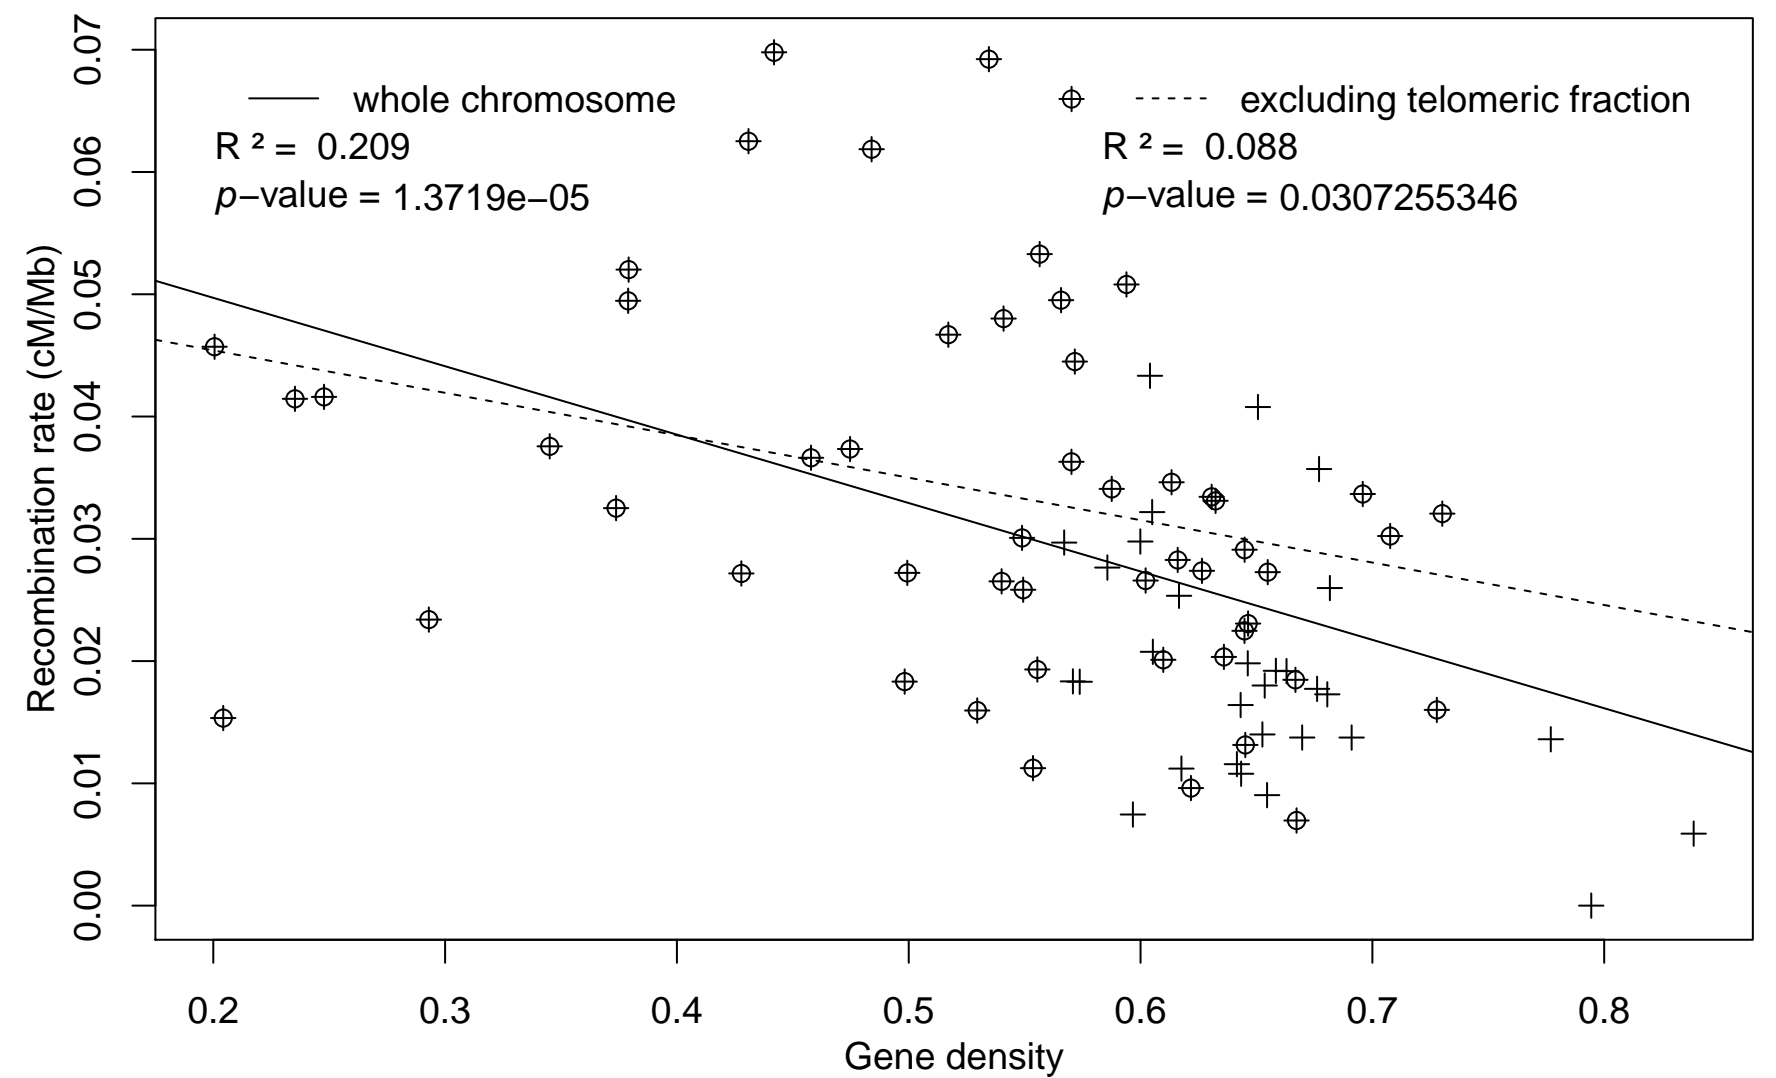



**Male Chr 1 removing 50 % of total length VALUES Gene density**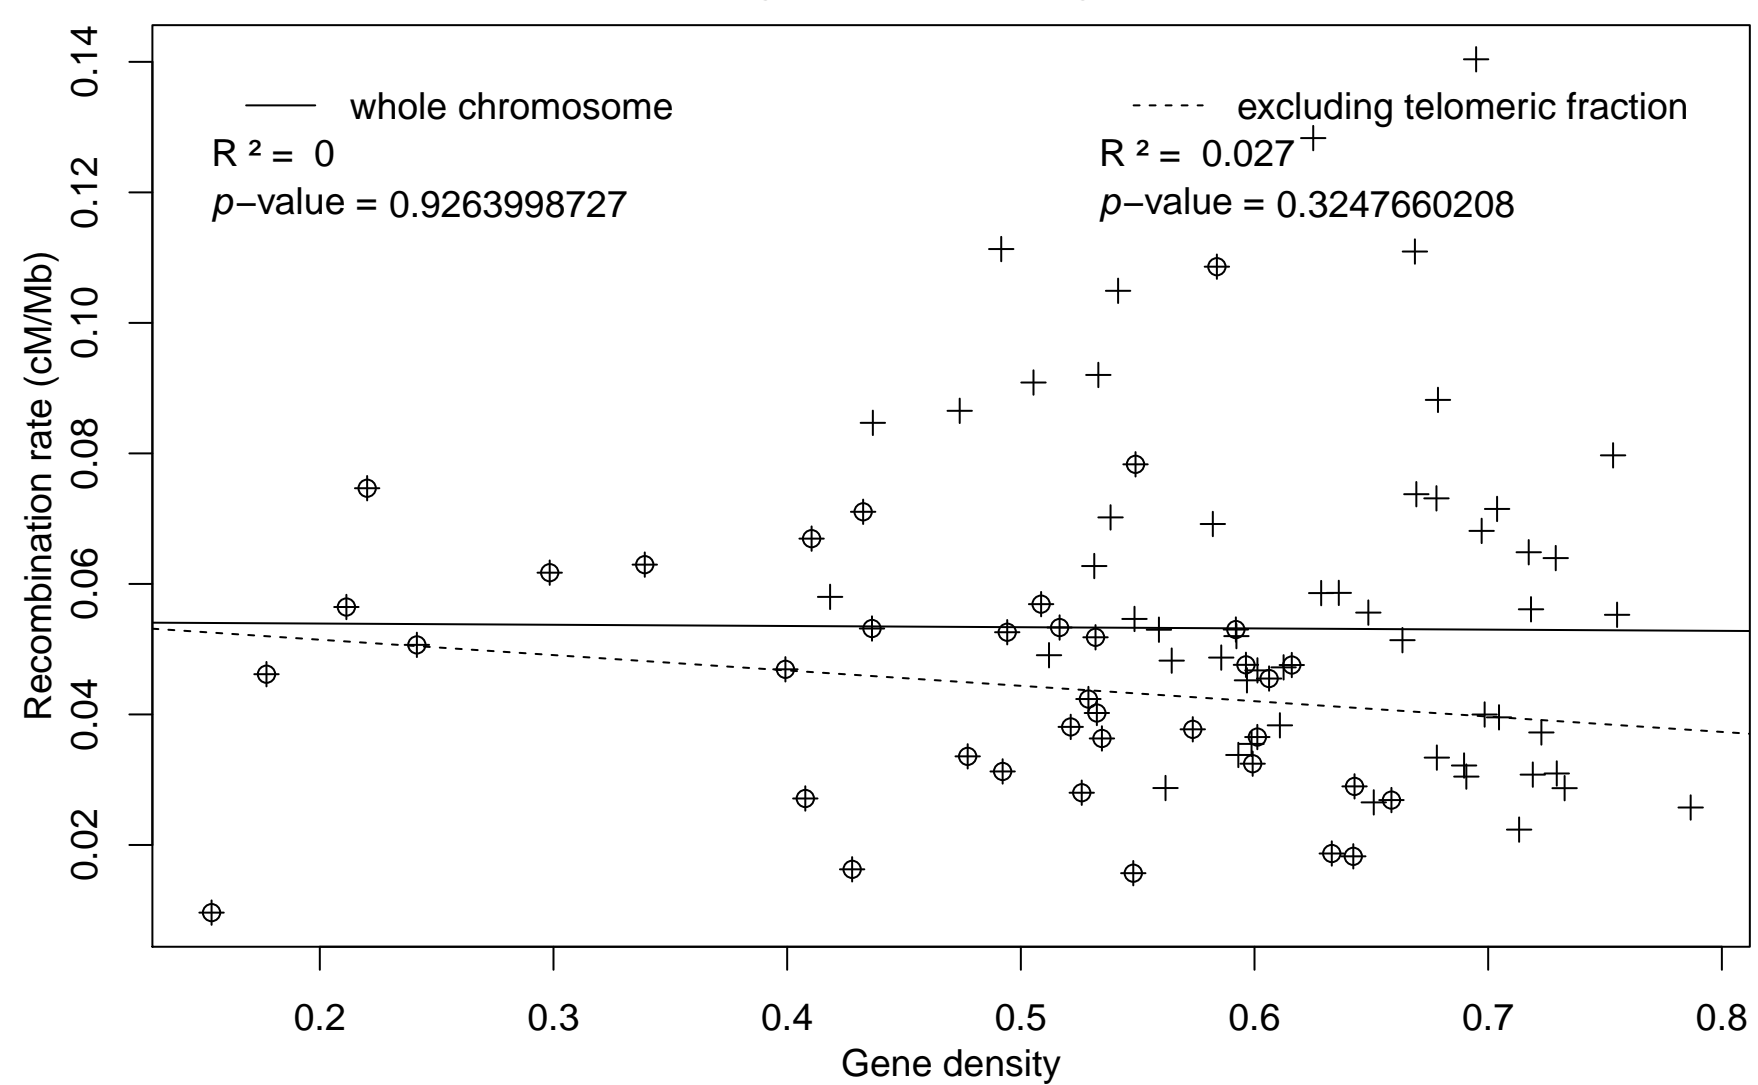**Female Chr 1 removing 50 % of total length VALUES Gene density**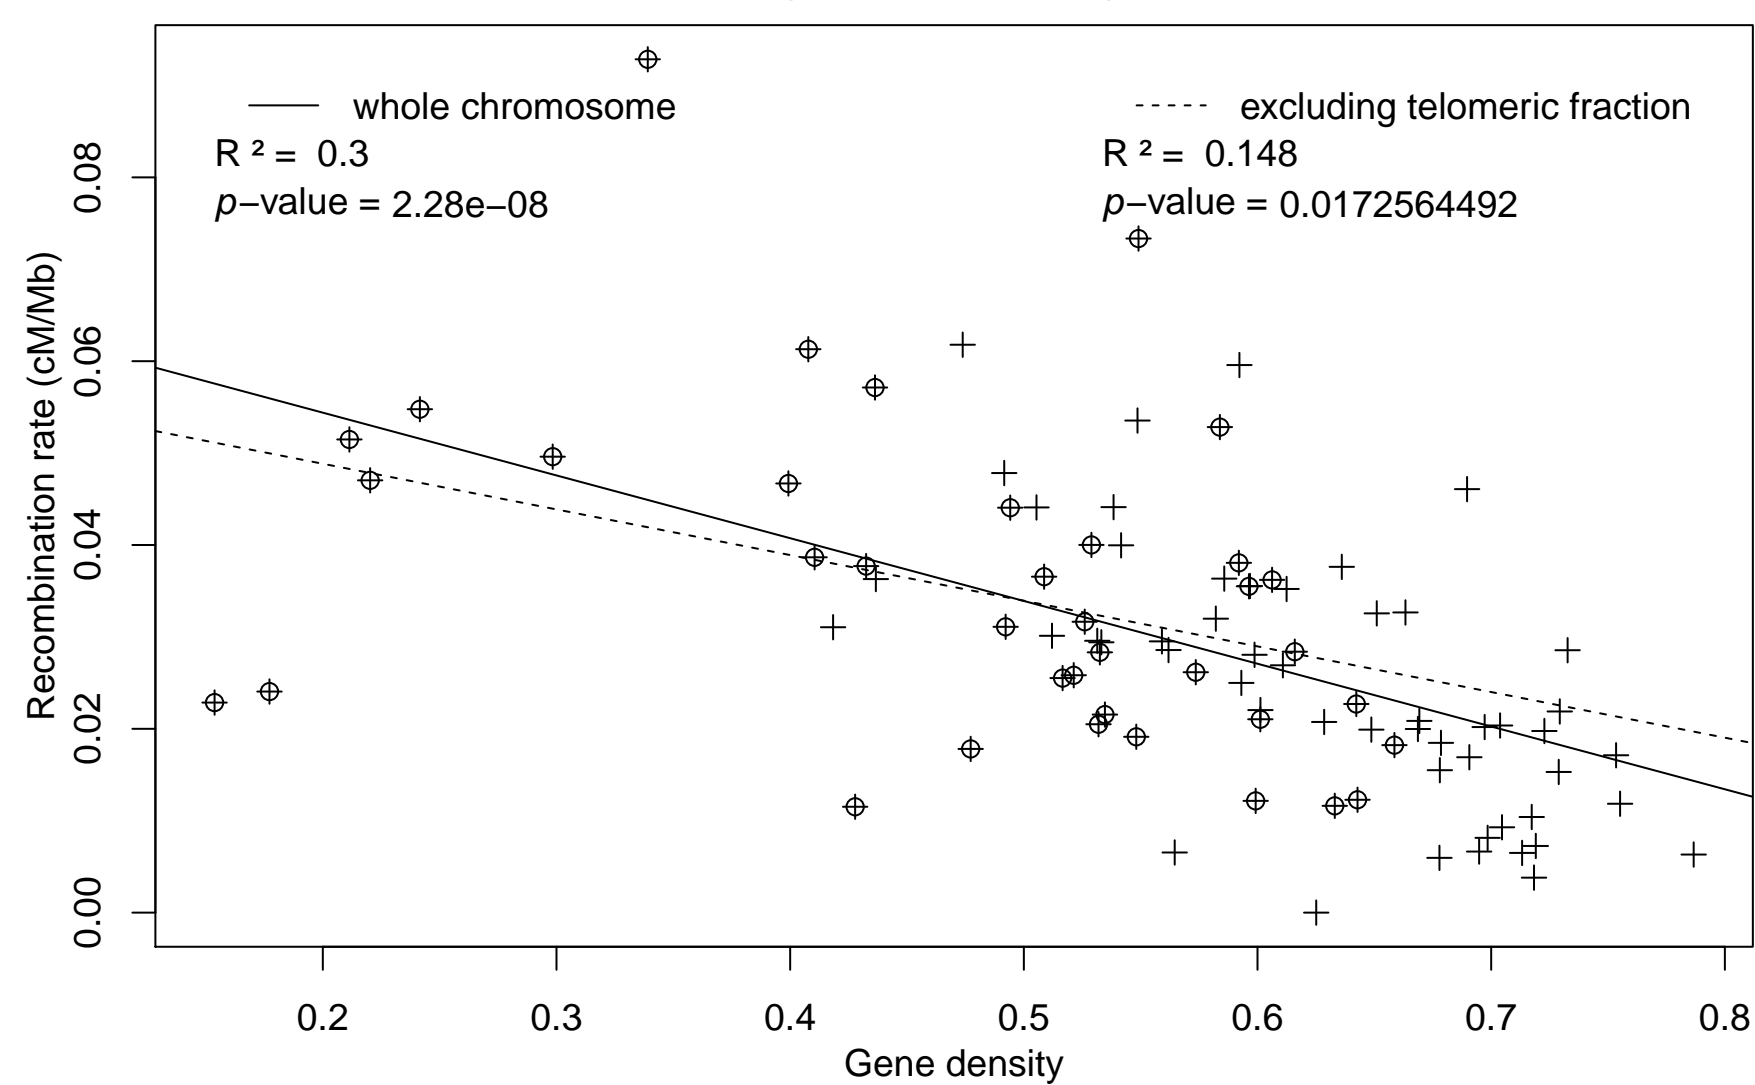**Male Chr 2 removing 50 % of total length VALUES Gene density**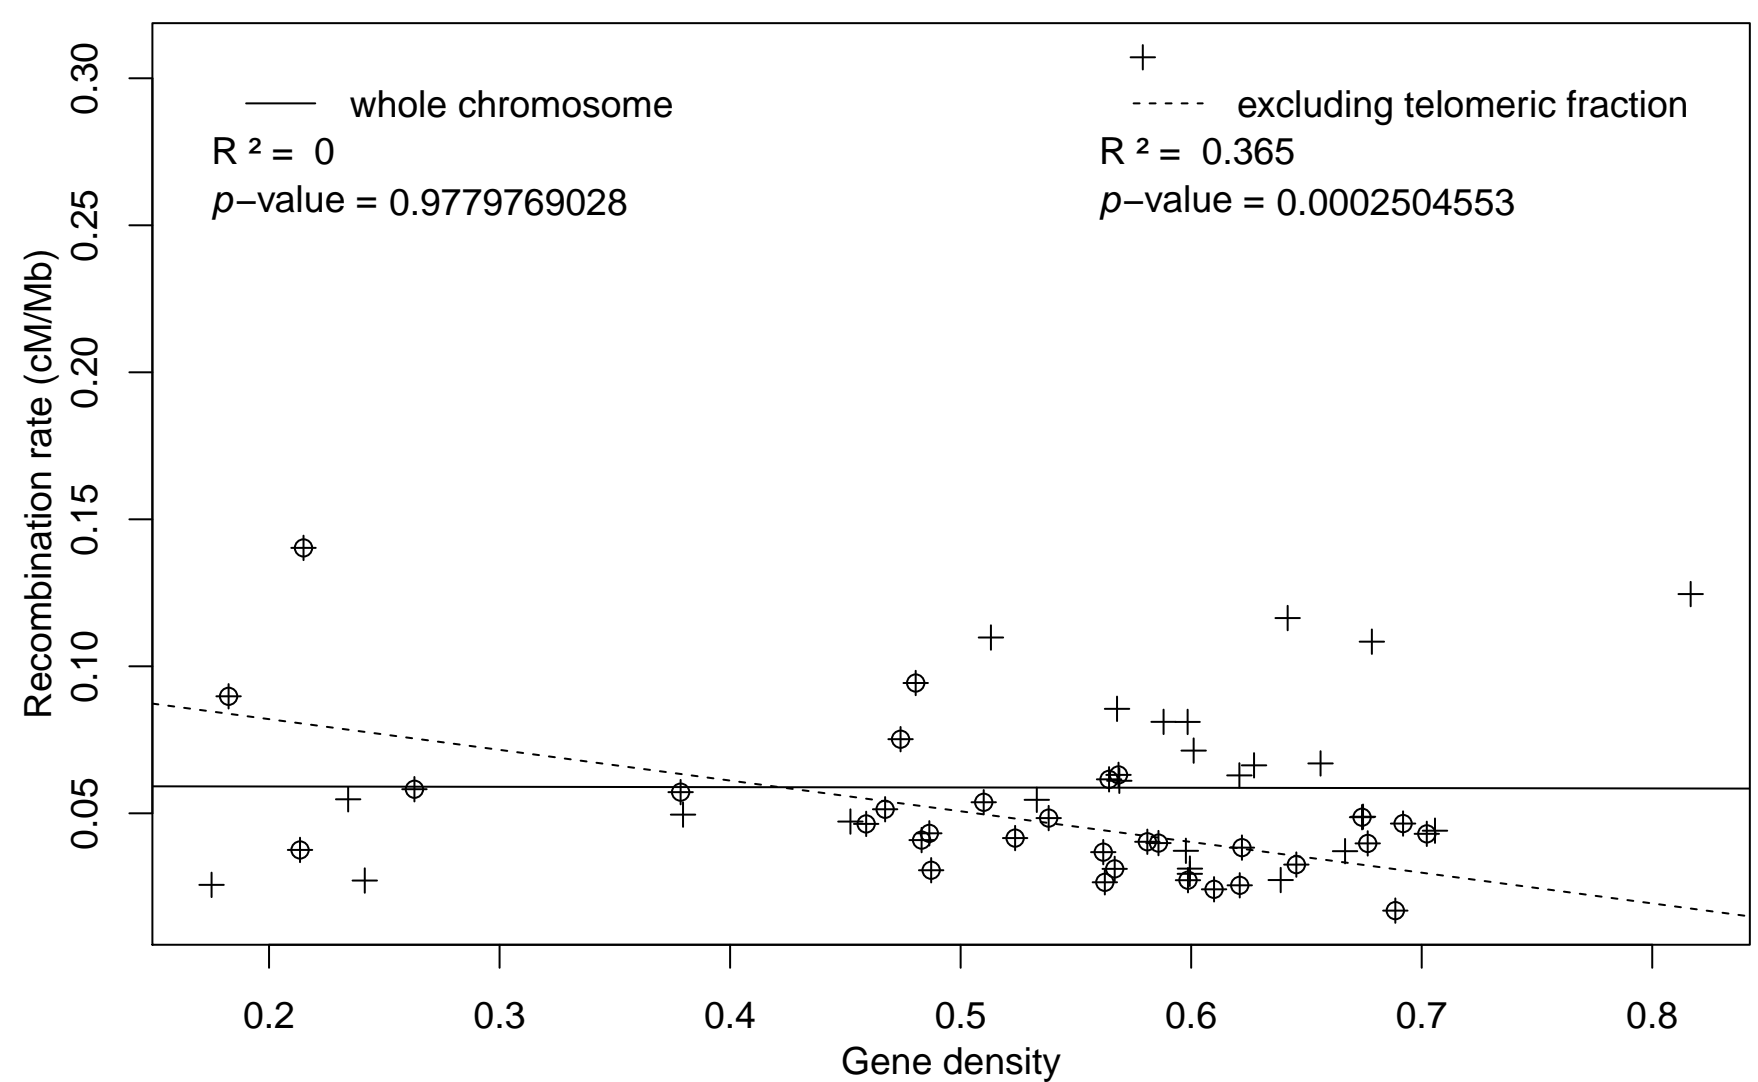**Female Chr 2 removing 50 % of total length VALUES Gene density**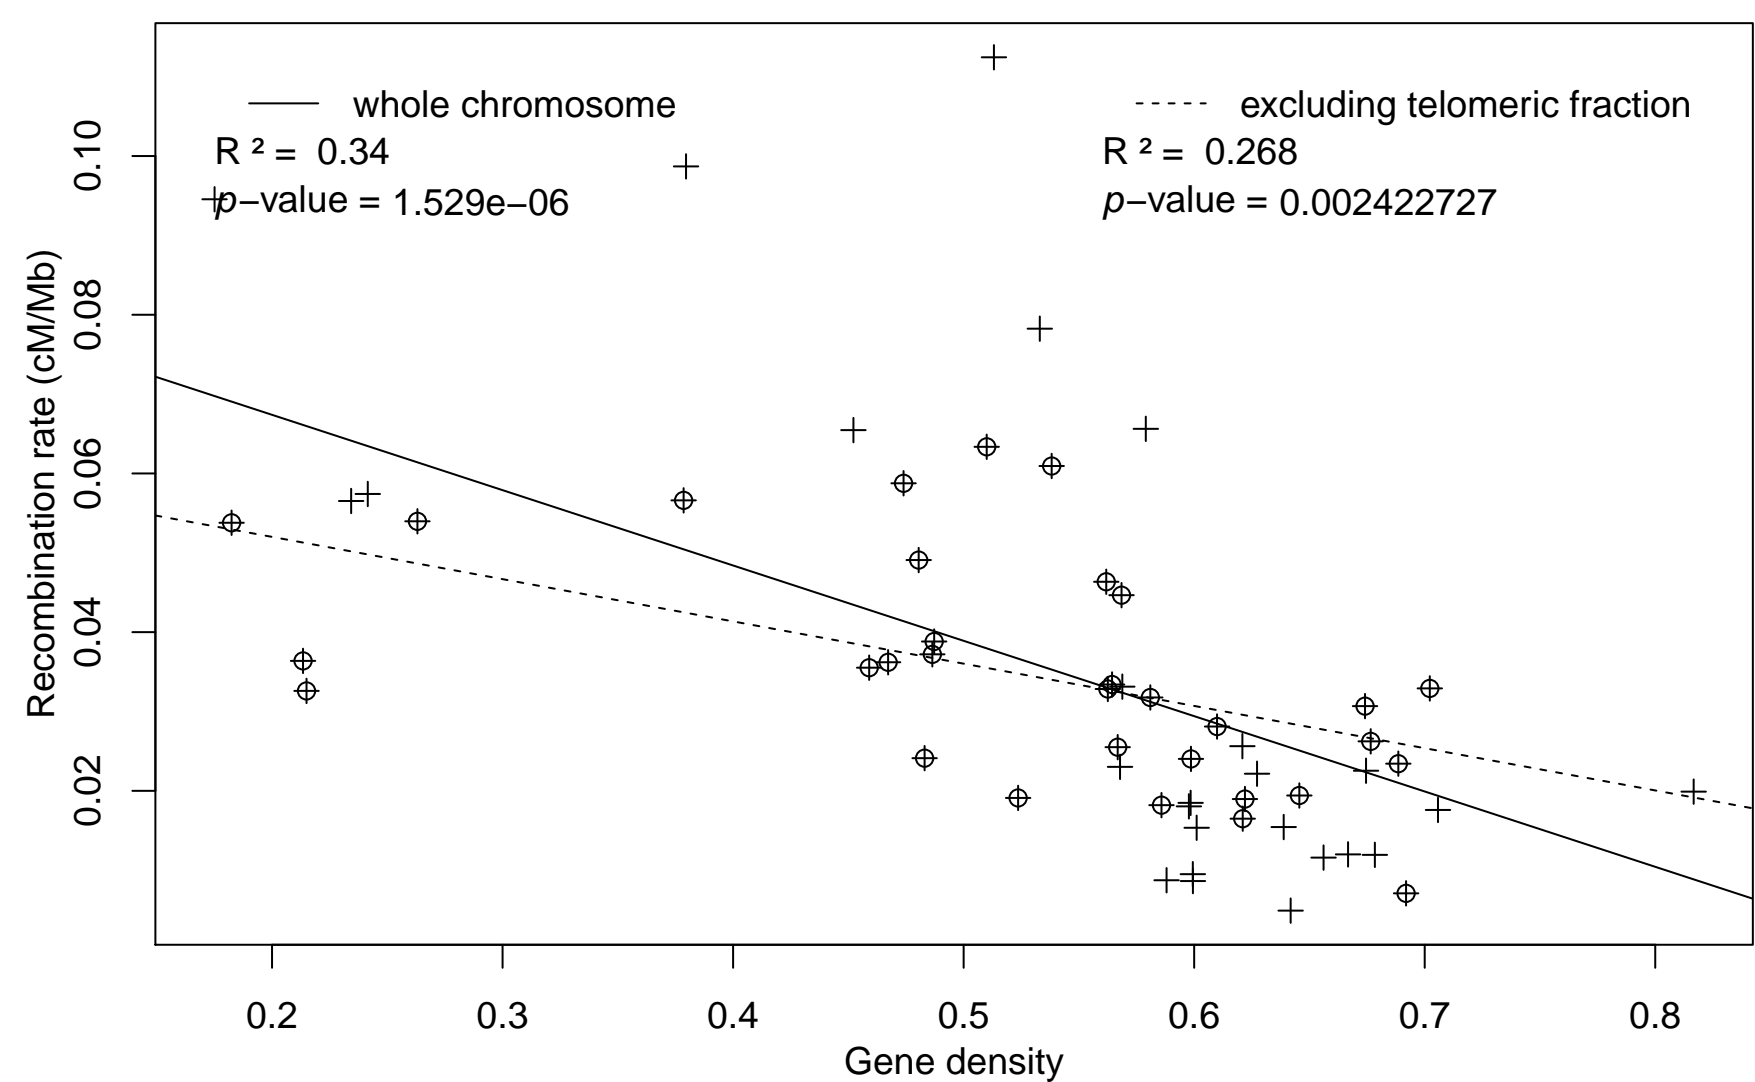**Male Chr 3 removing 50 % of total length VALUES Gene density**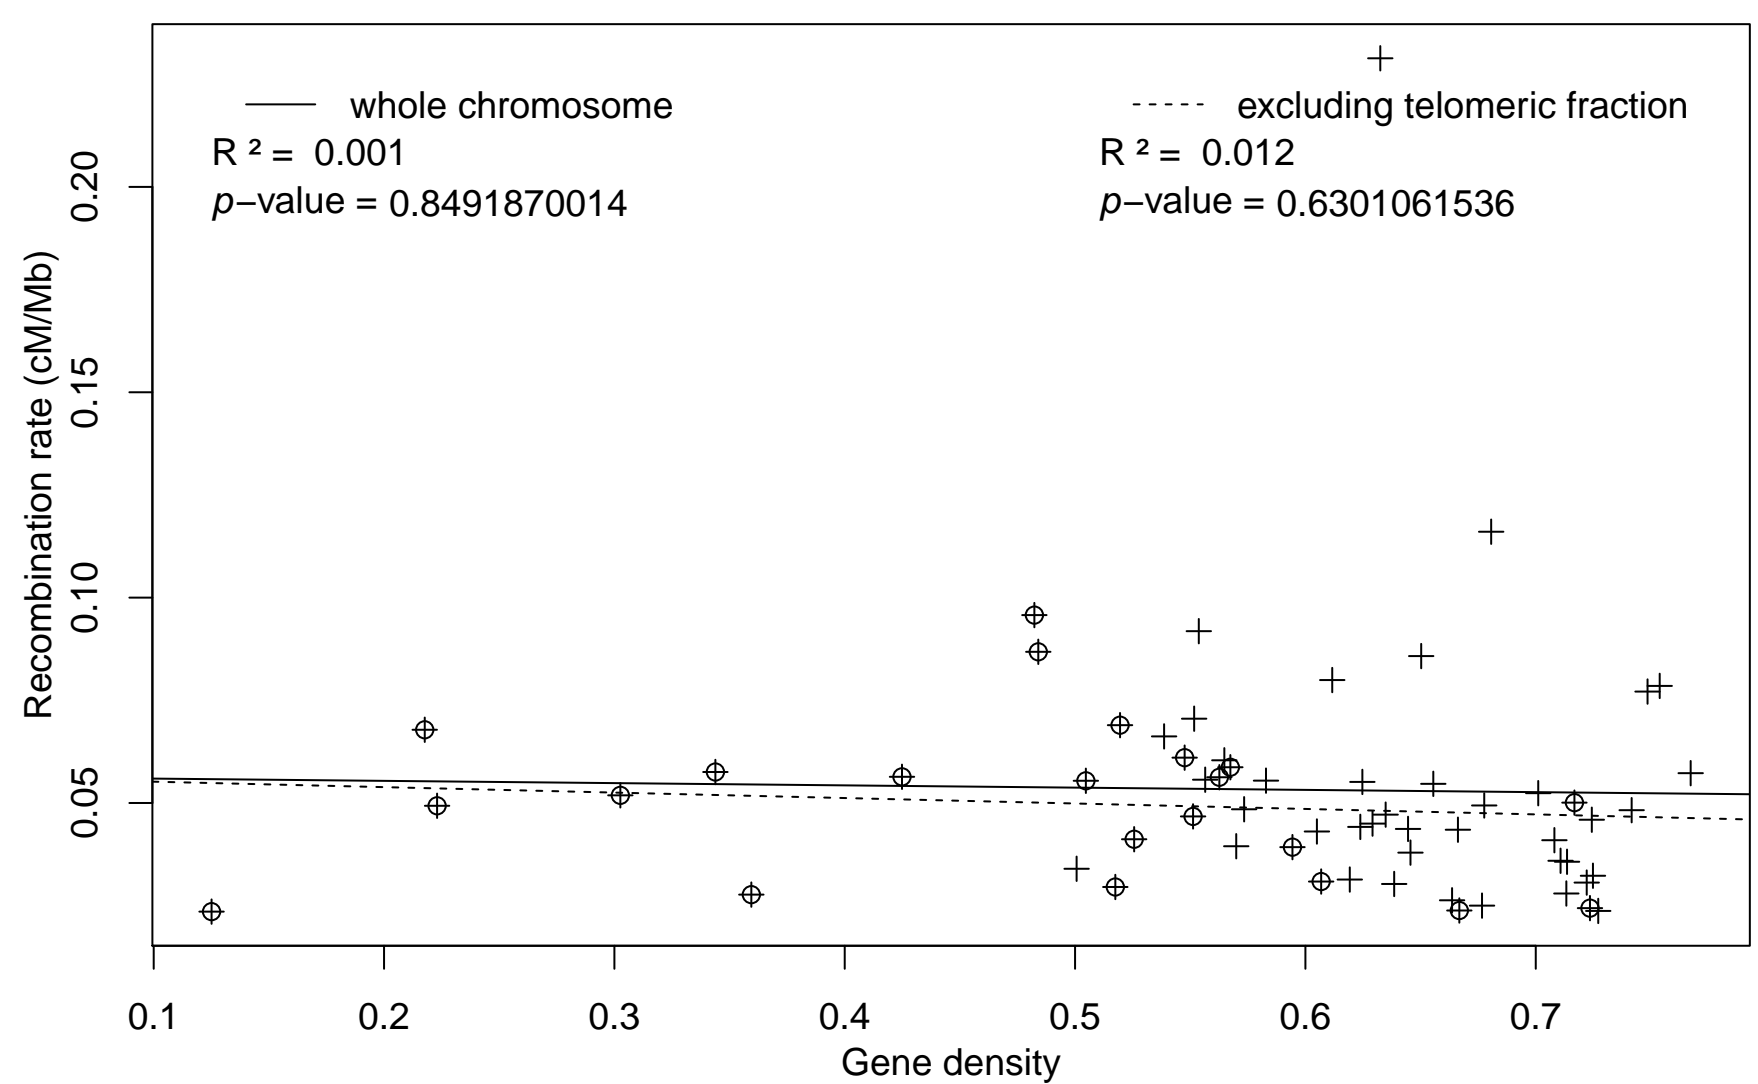**Female Chr 3 removing 50 % of total length VALUES Gene density**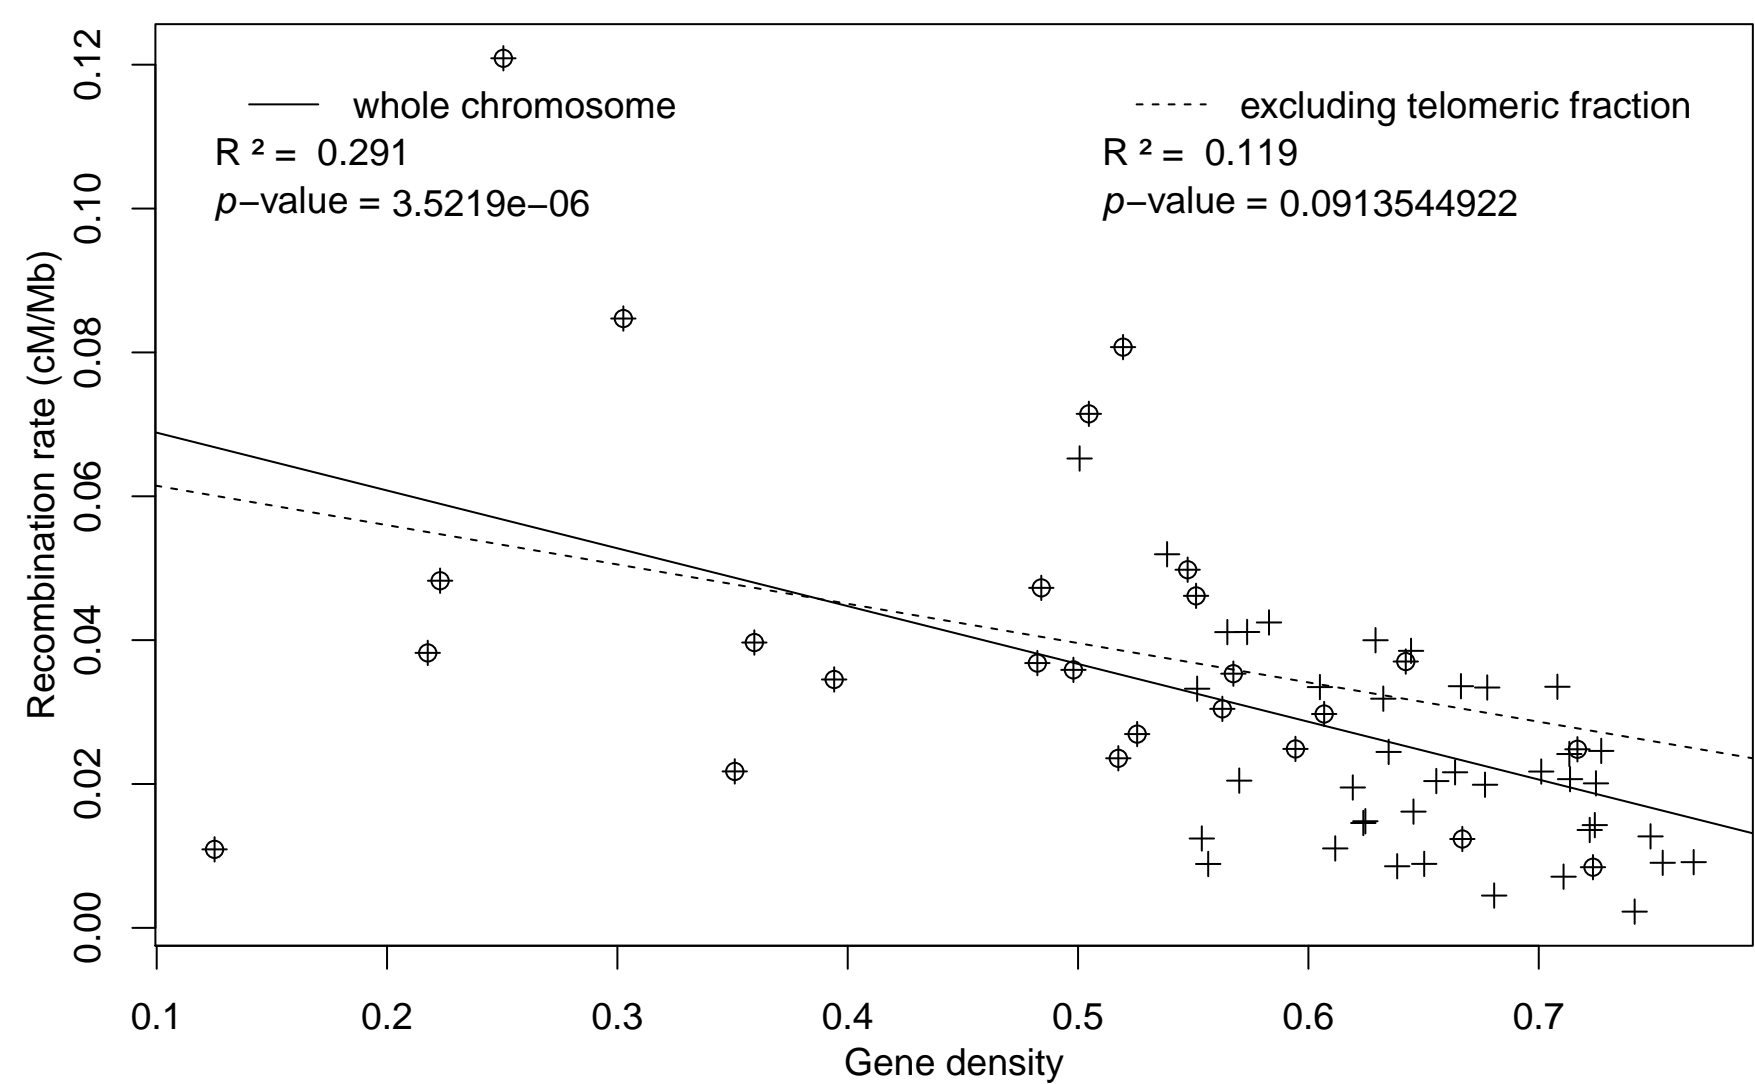**Male Chr 4 removing 50 % of total length VALUES Gene density**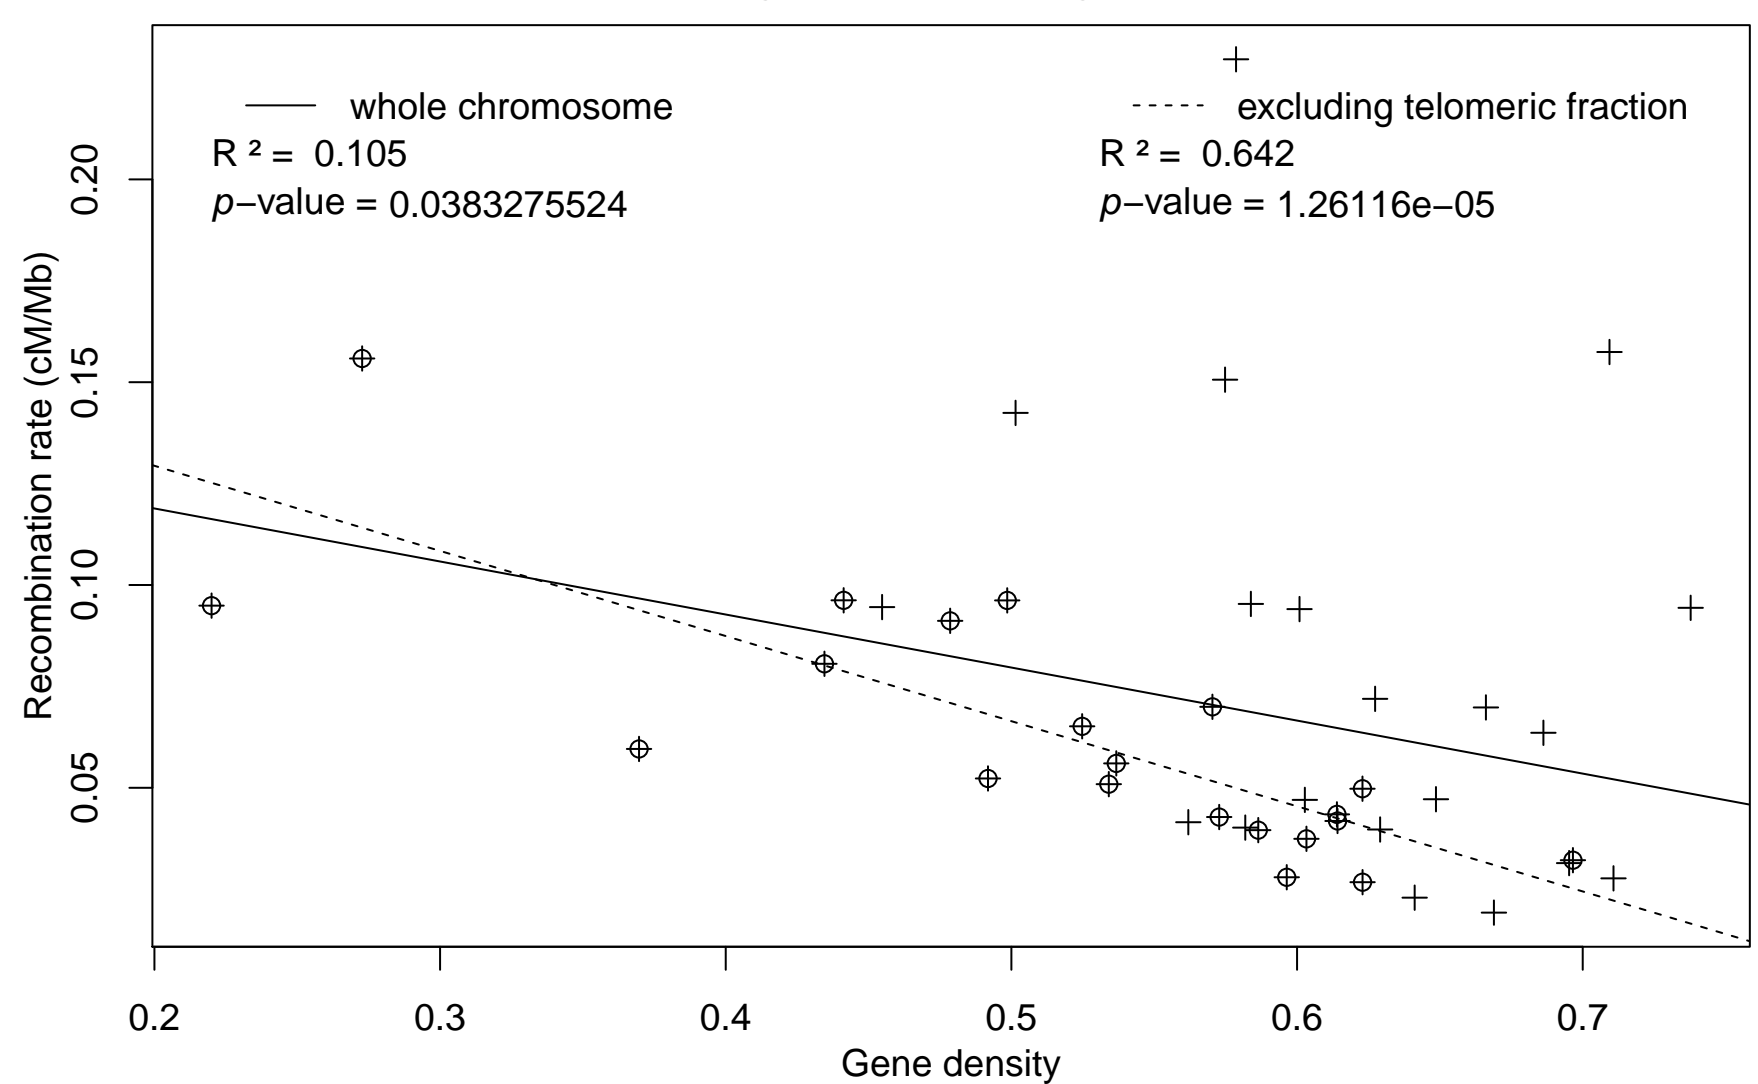**Female Chr 4 removing 50 % of total length VALUES Gene density**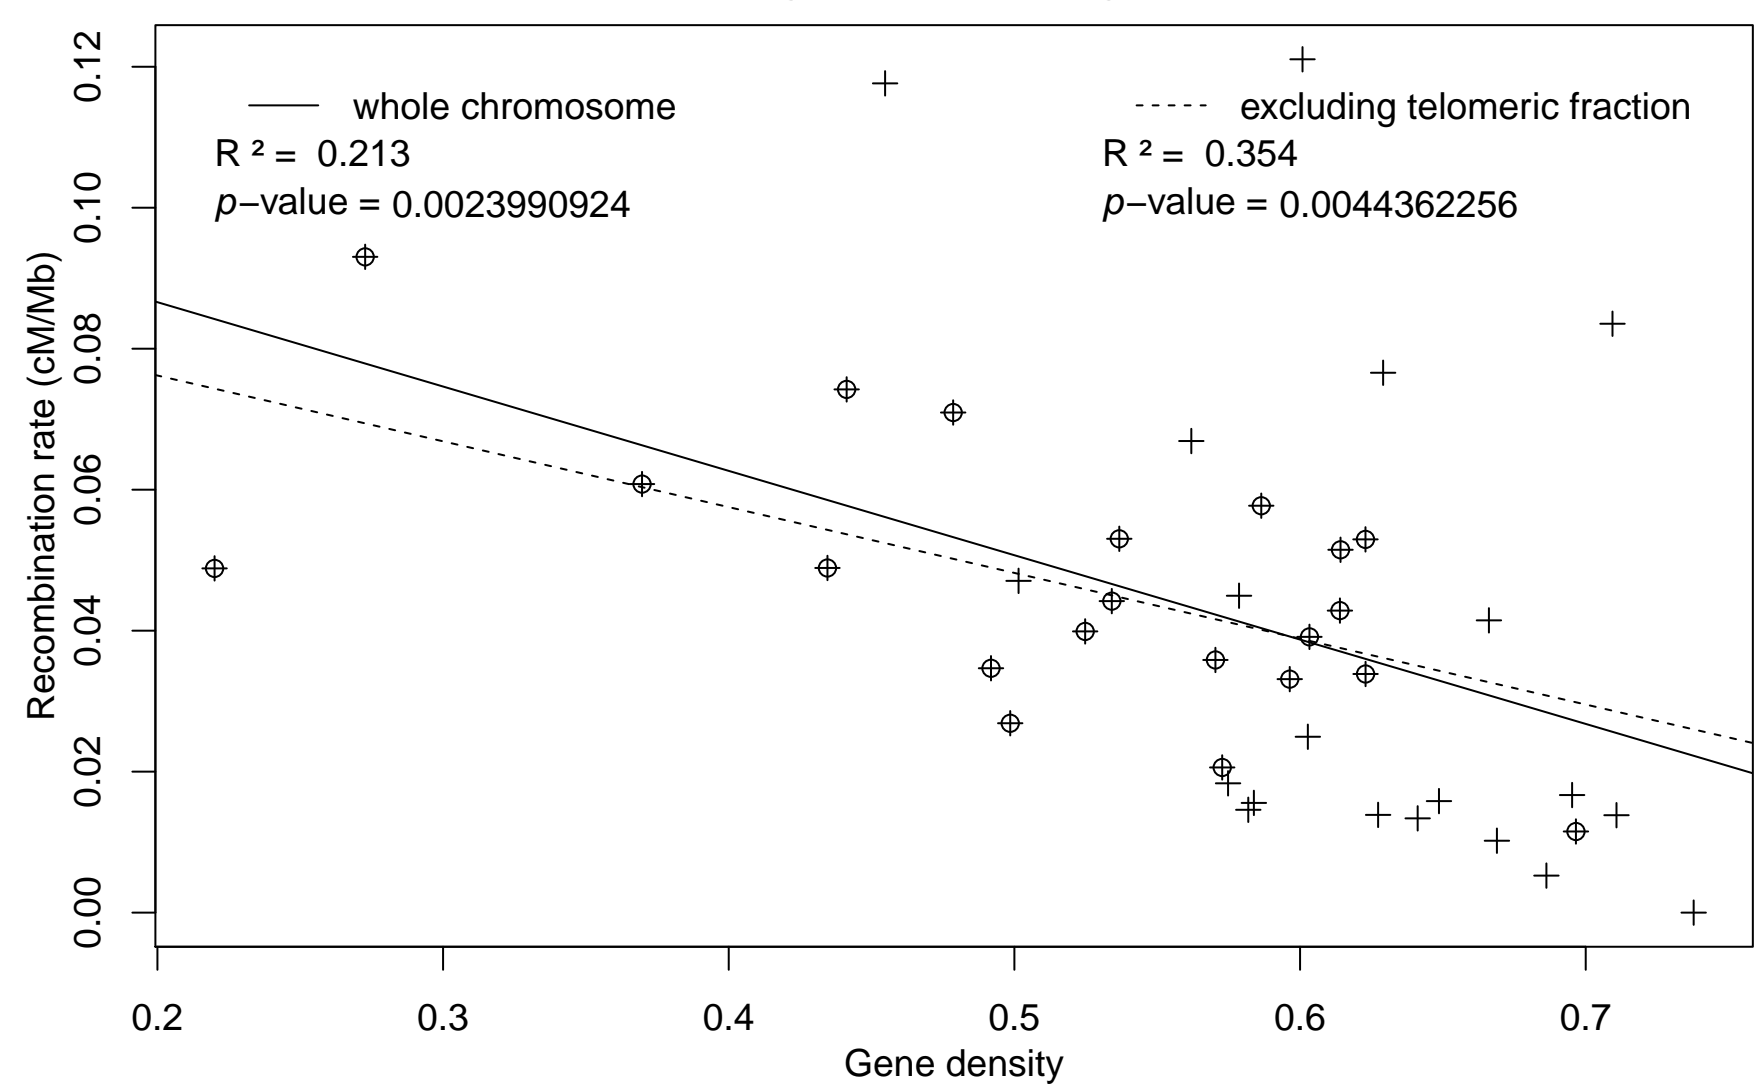**Male Chr 5 removing 50 % of total length VALUES Gene density**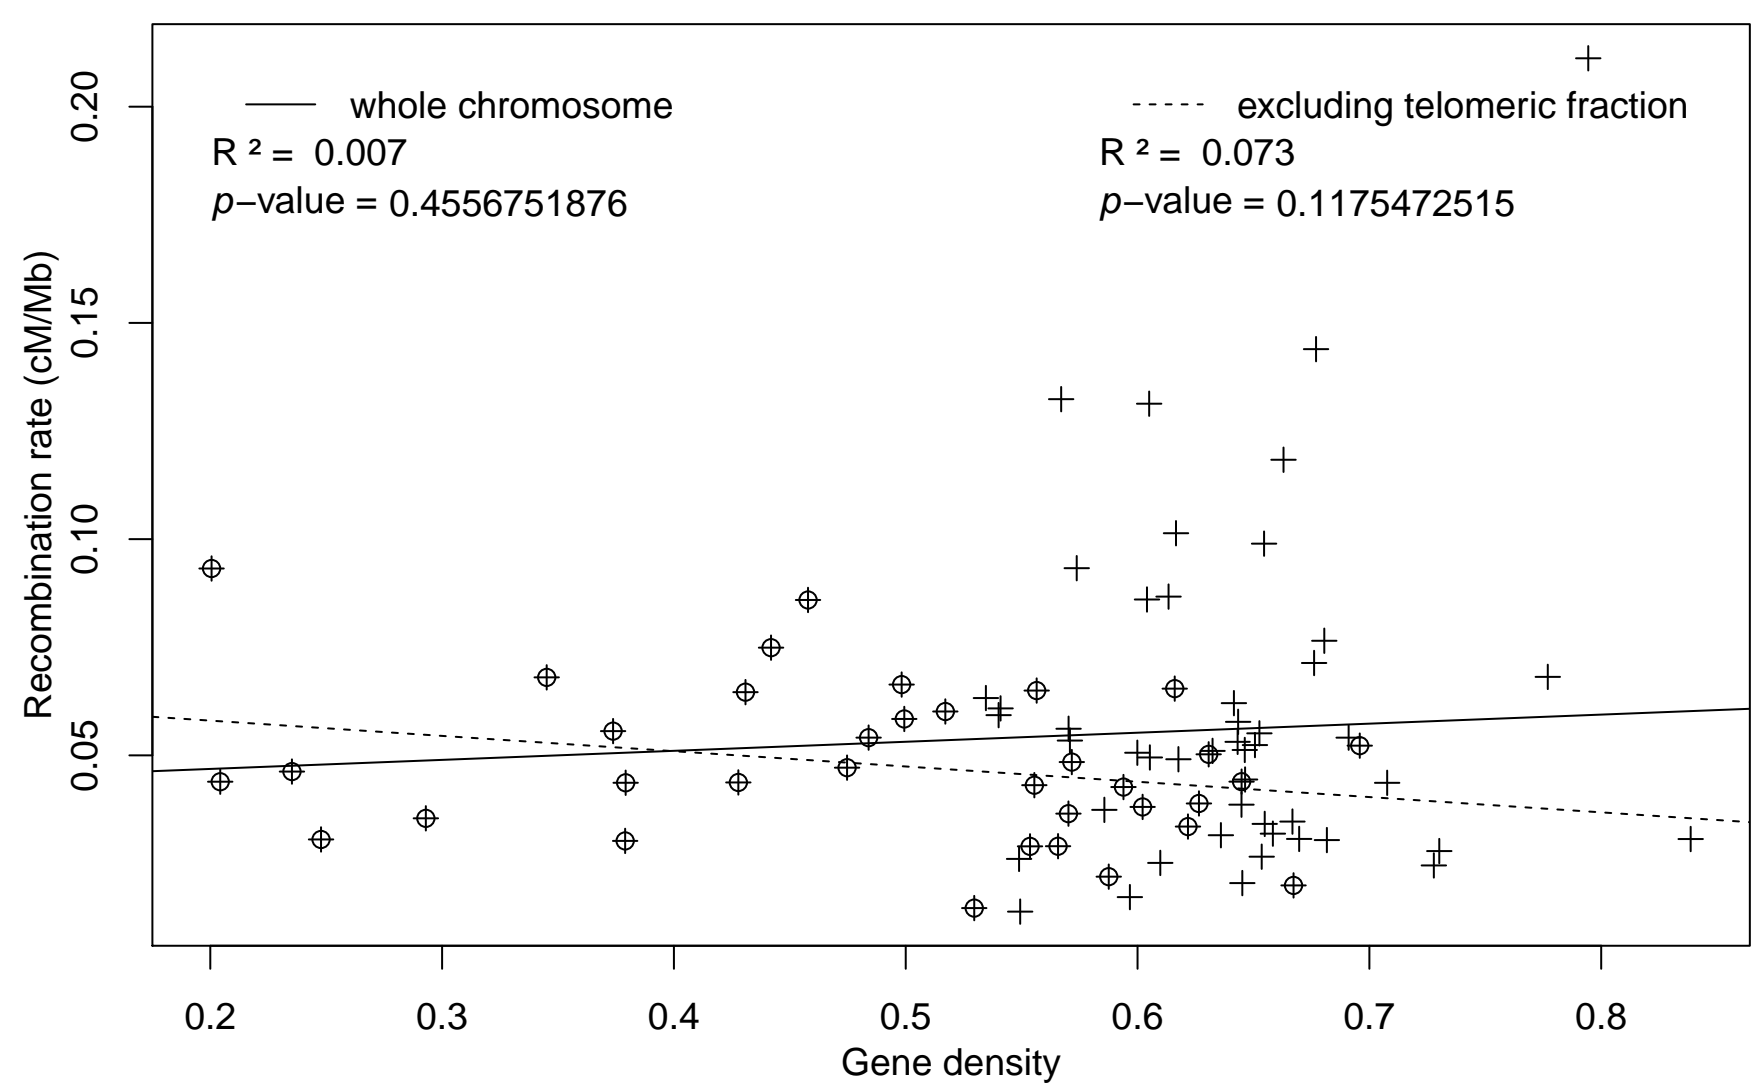**Female Chr 5 removing 50 % of total length VALUES Gene density**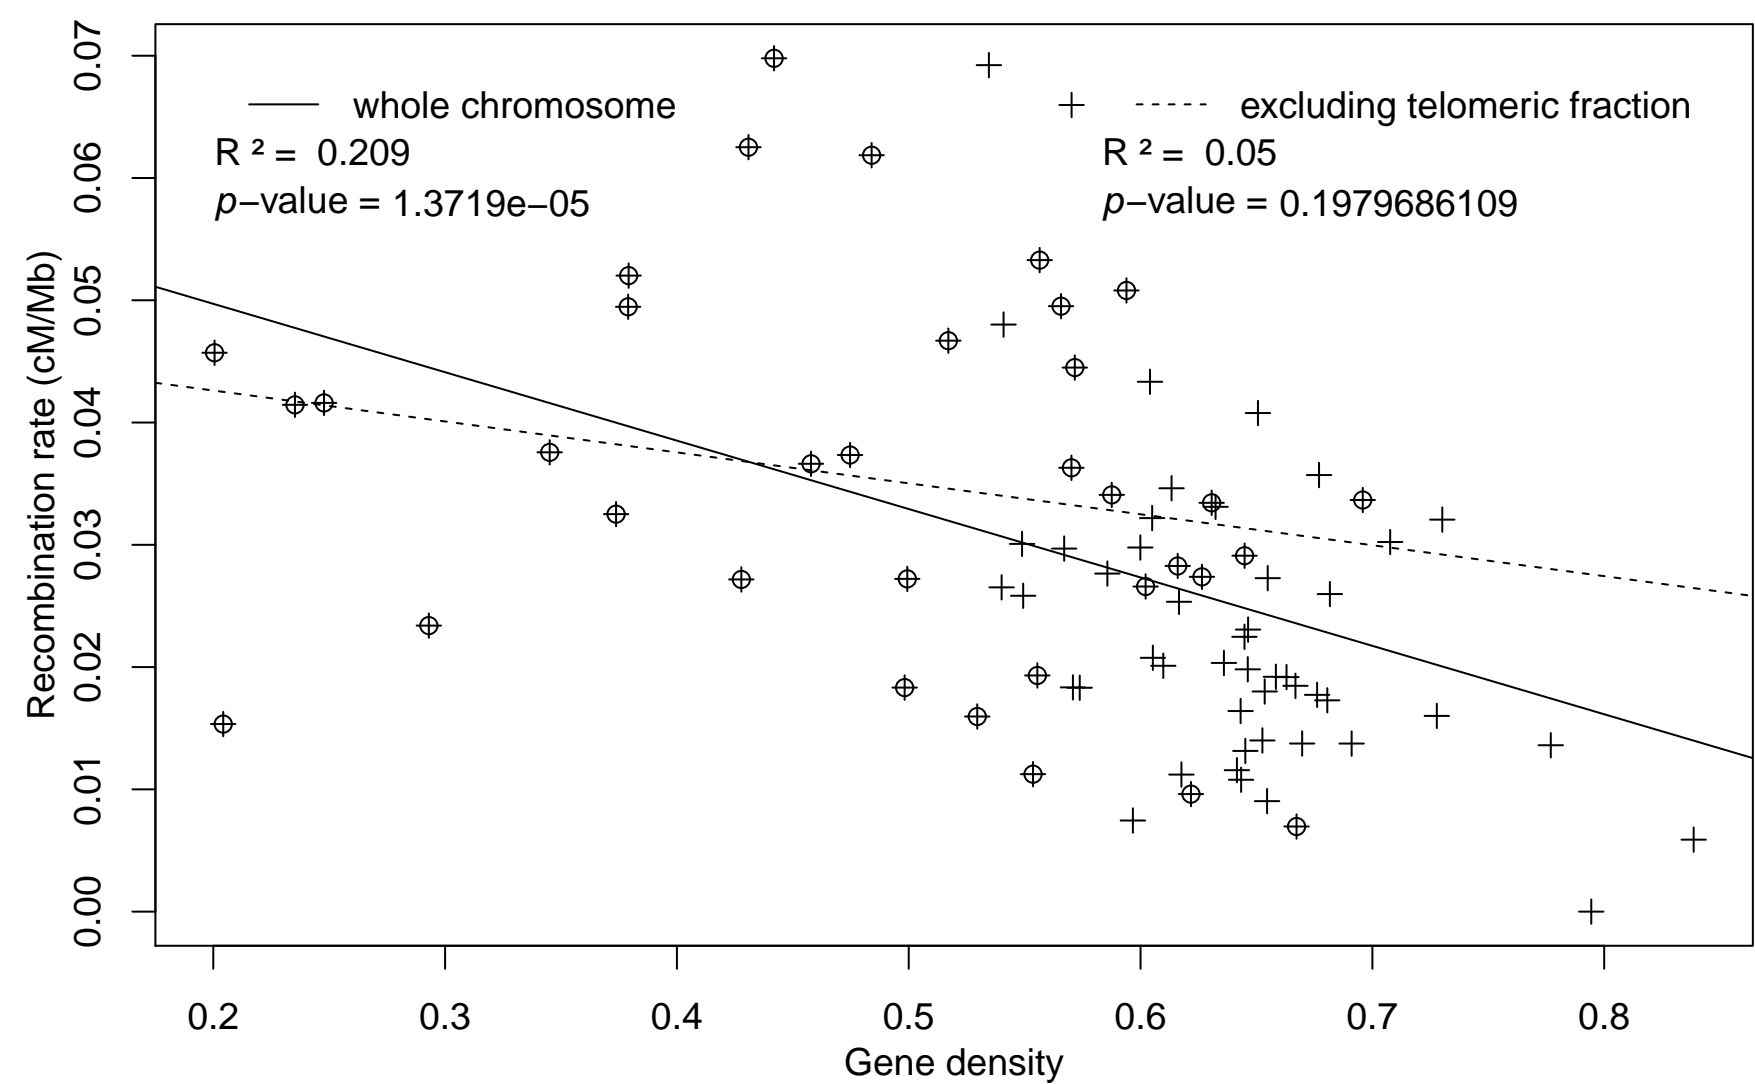

**Chromosome 1 TE density left arm**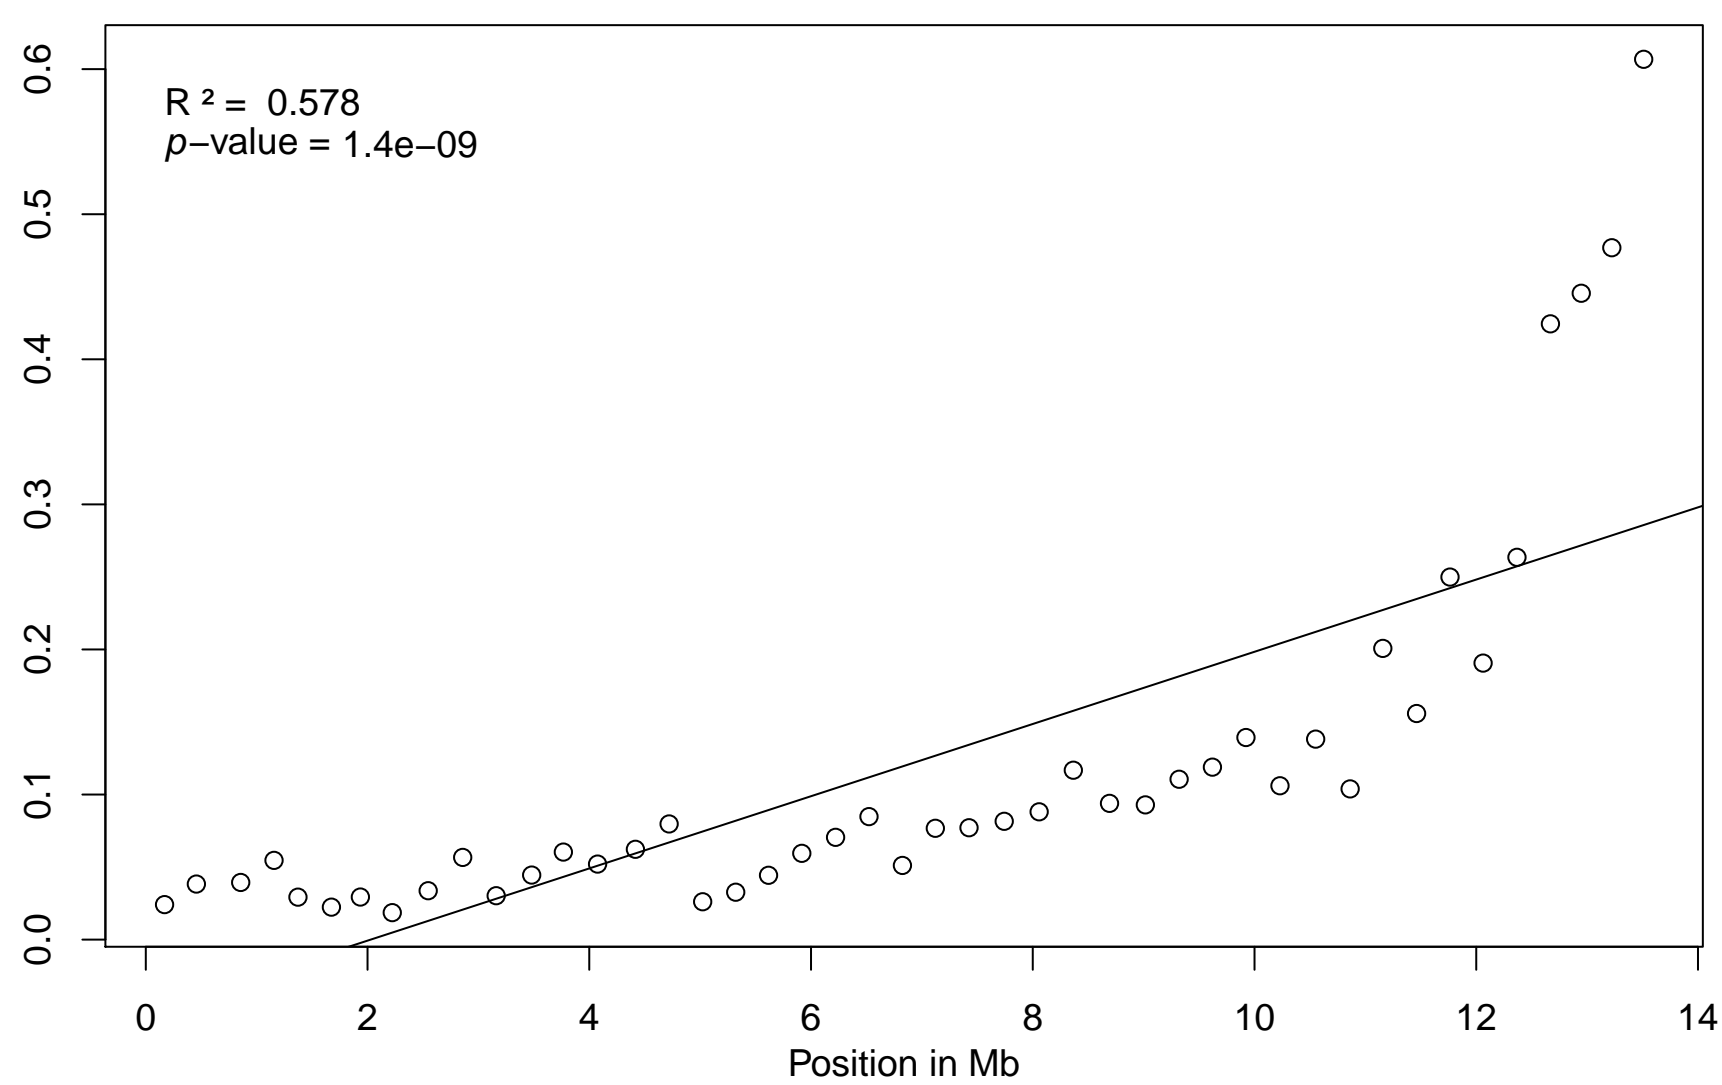**Chromosome 1 TE density right arm**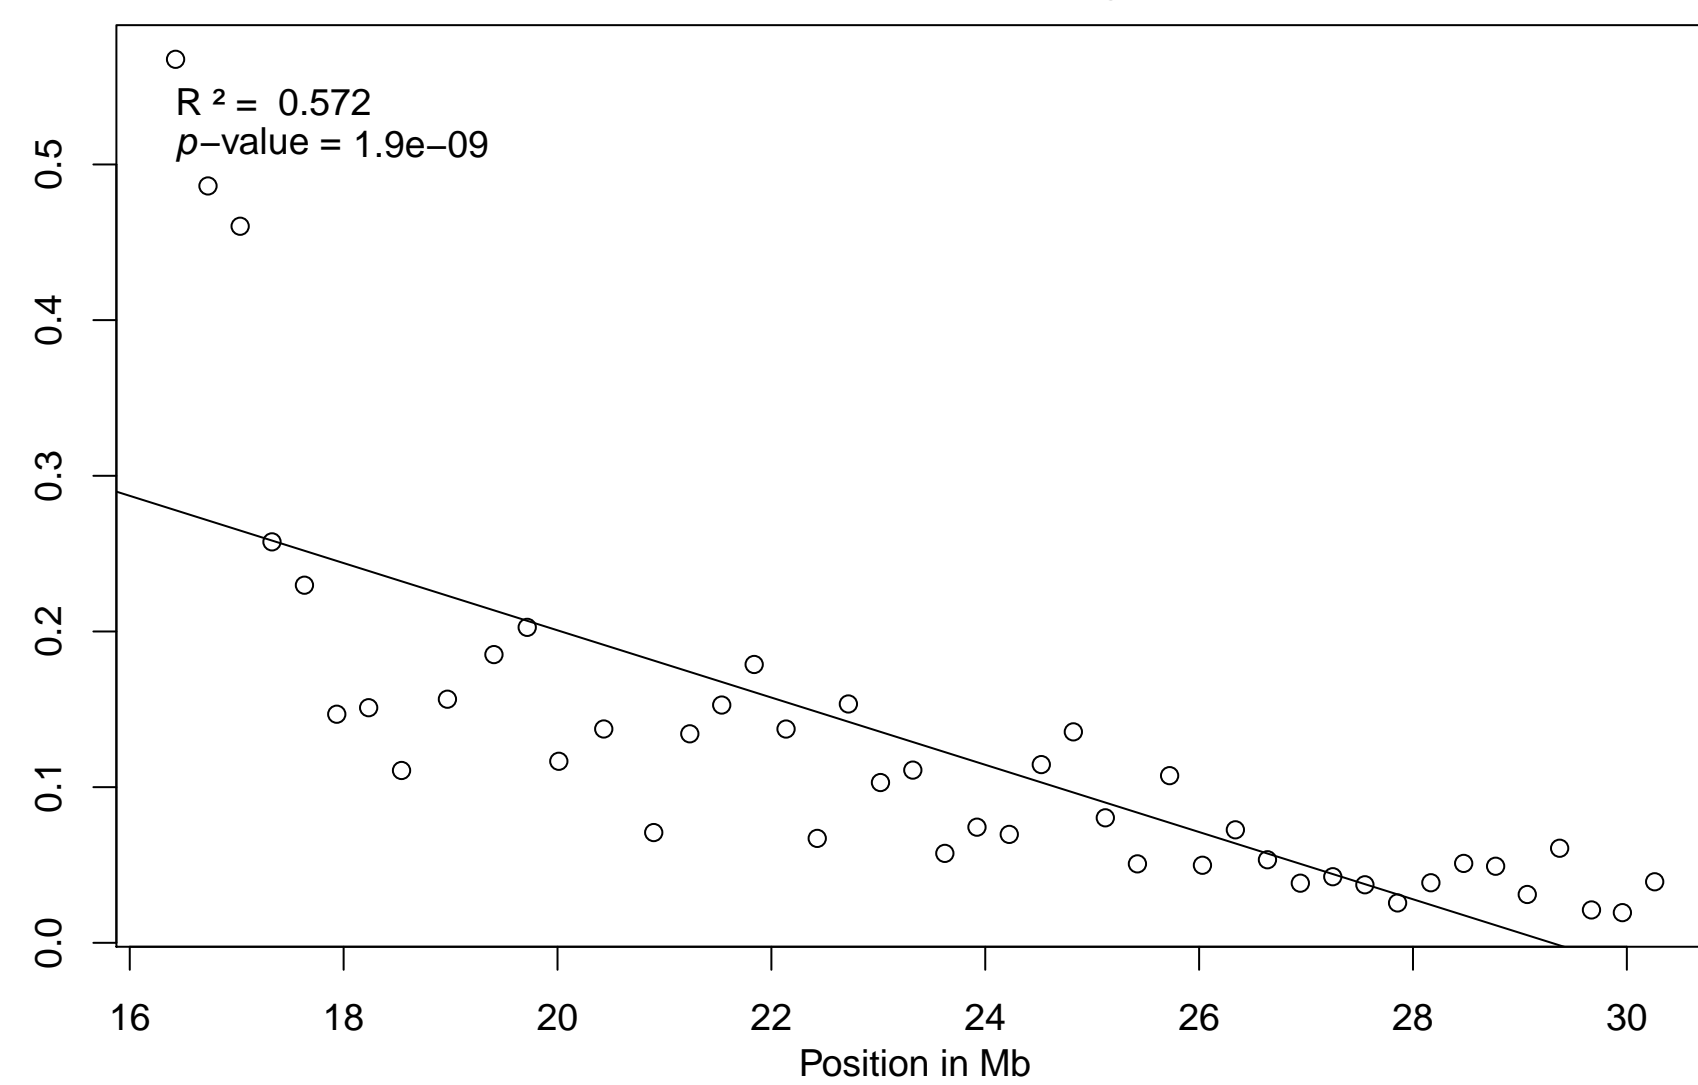**Chromosome 2 TE density left arm**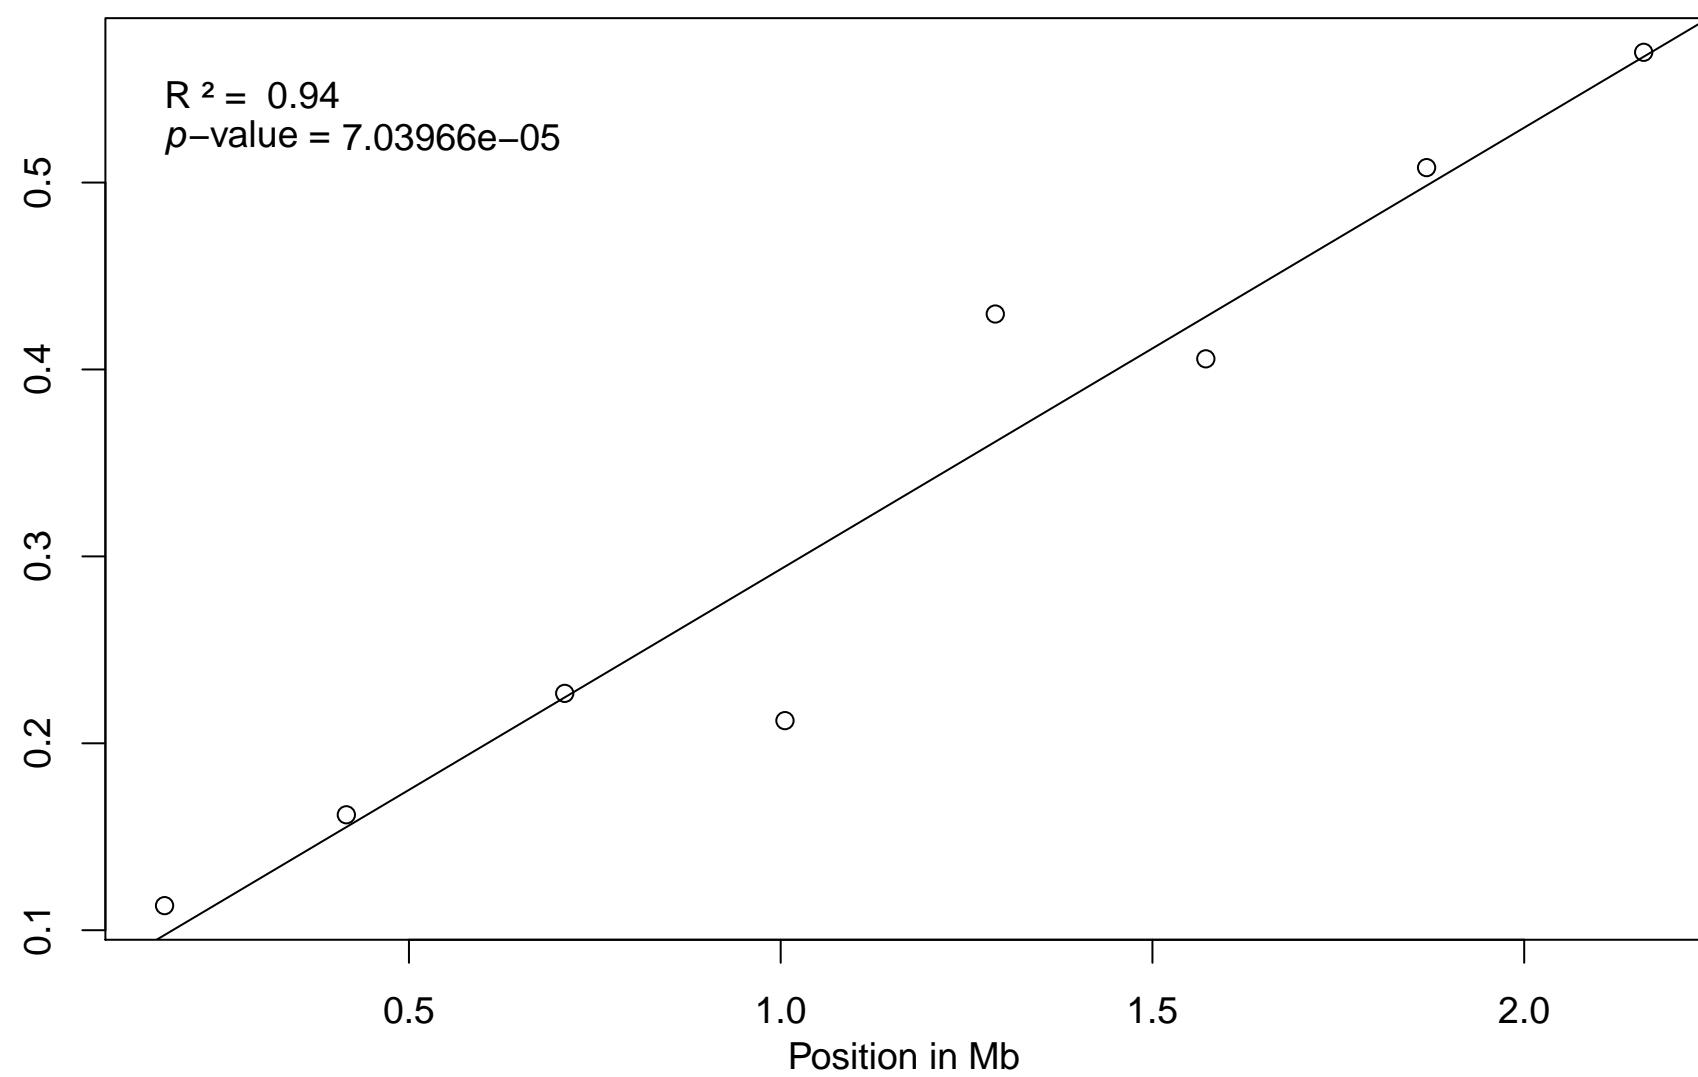**Chromosome 2 TE density right arm**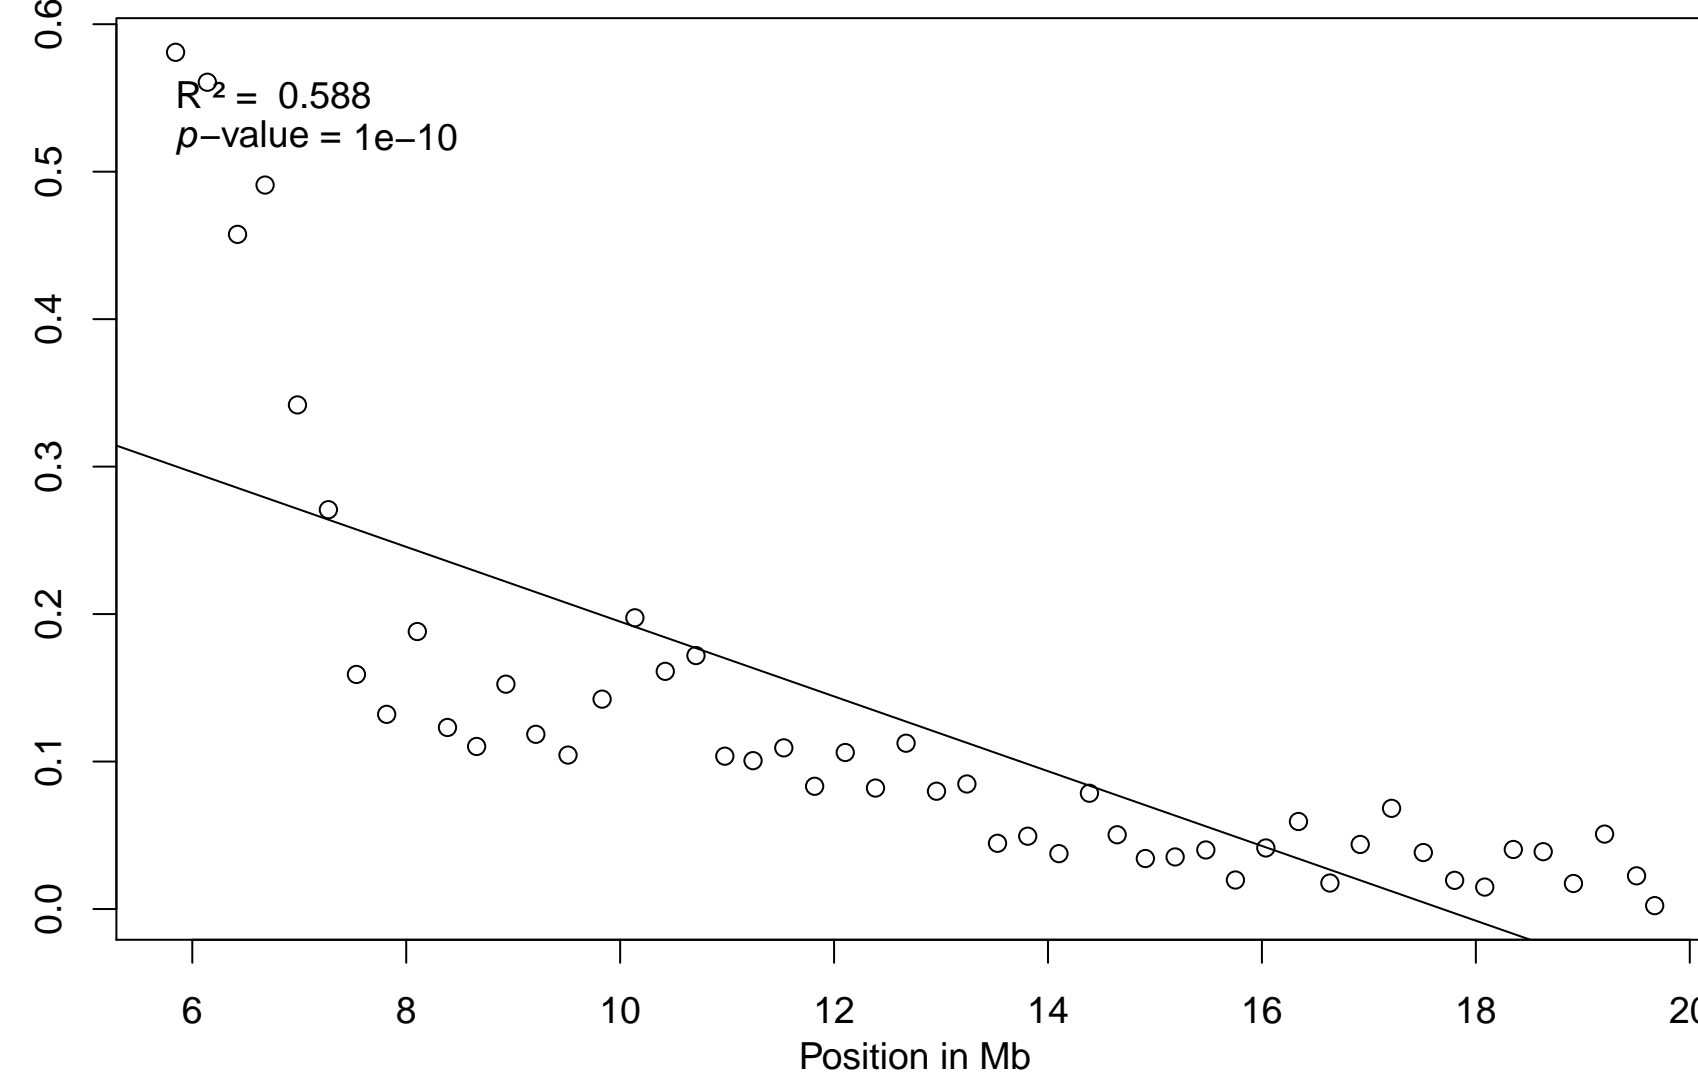**Chromosome 3 TE density left arm**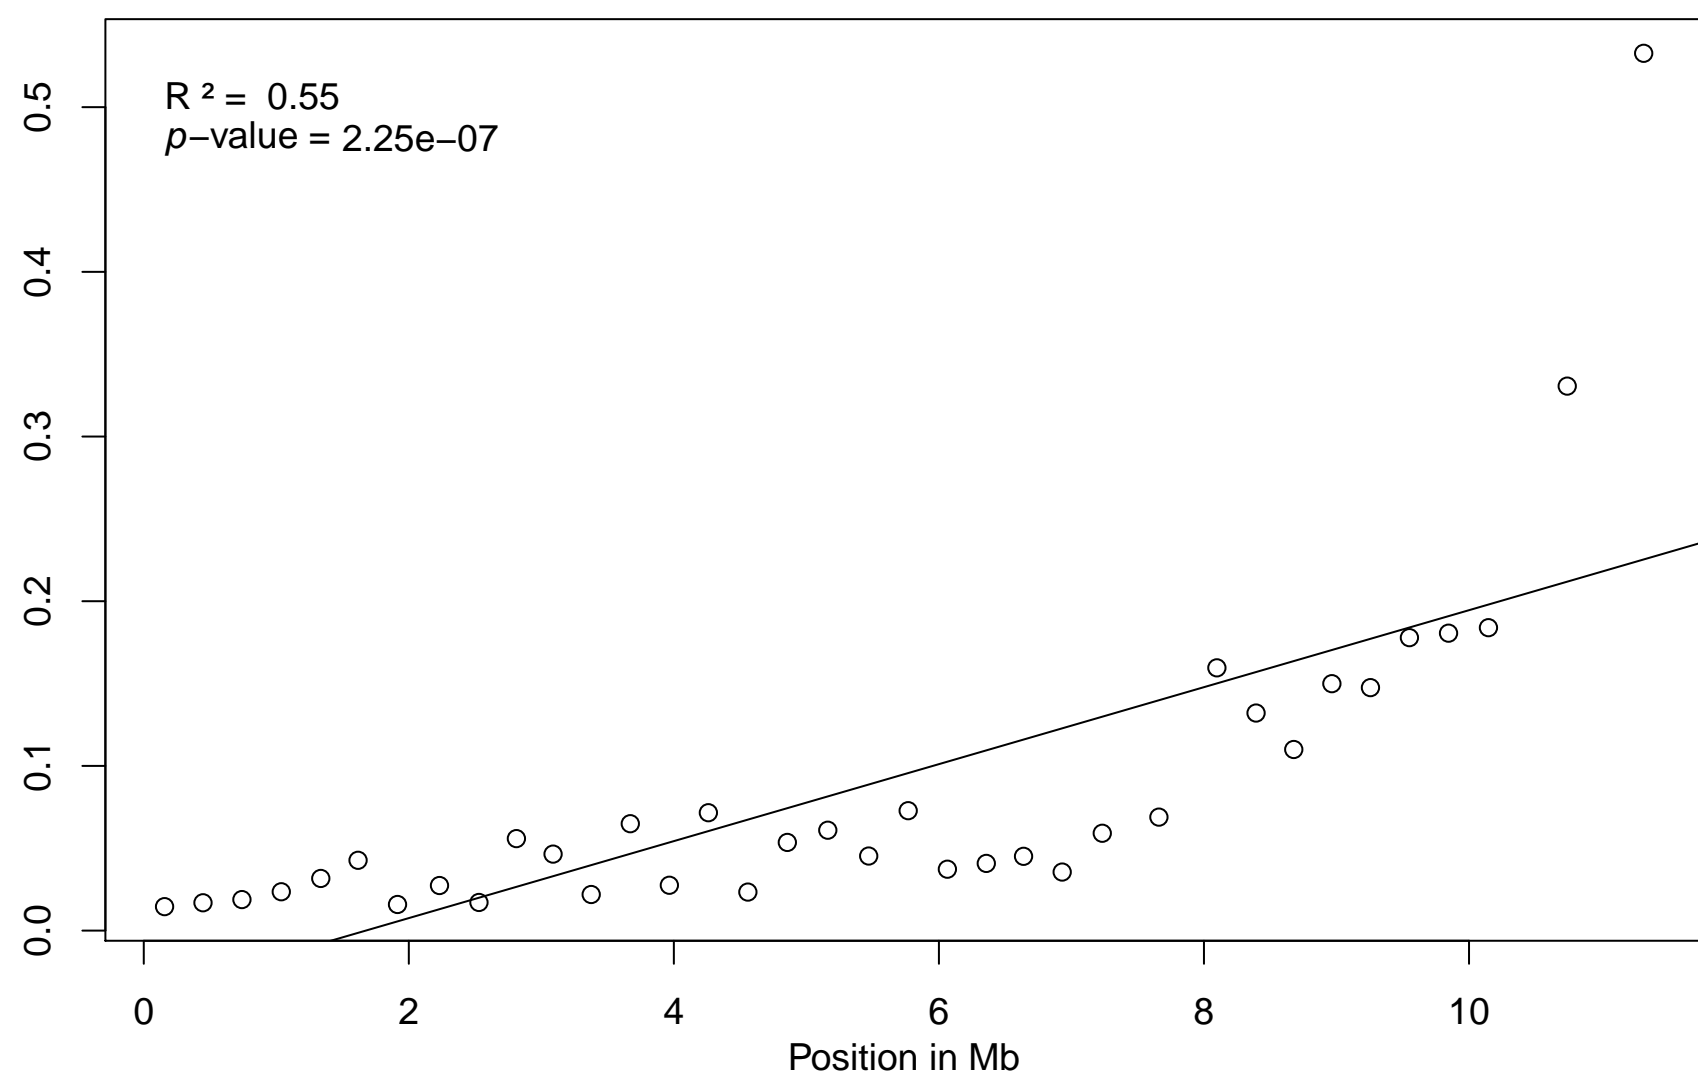**Chromosome 3 TE density right arm**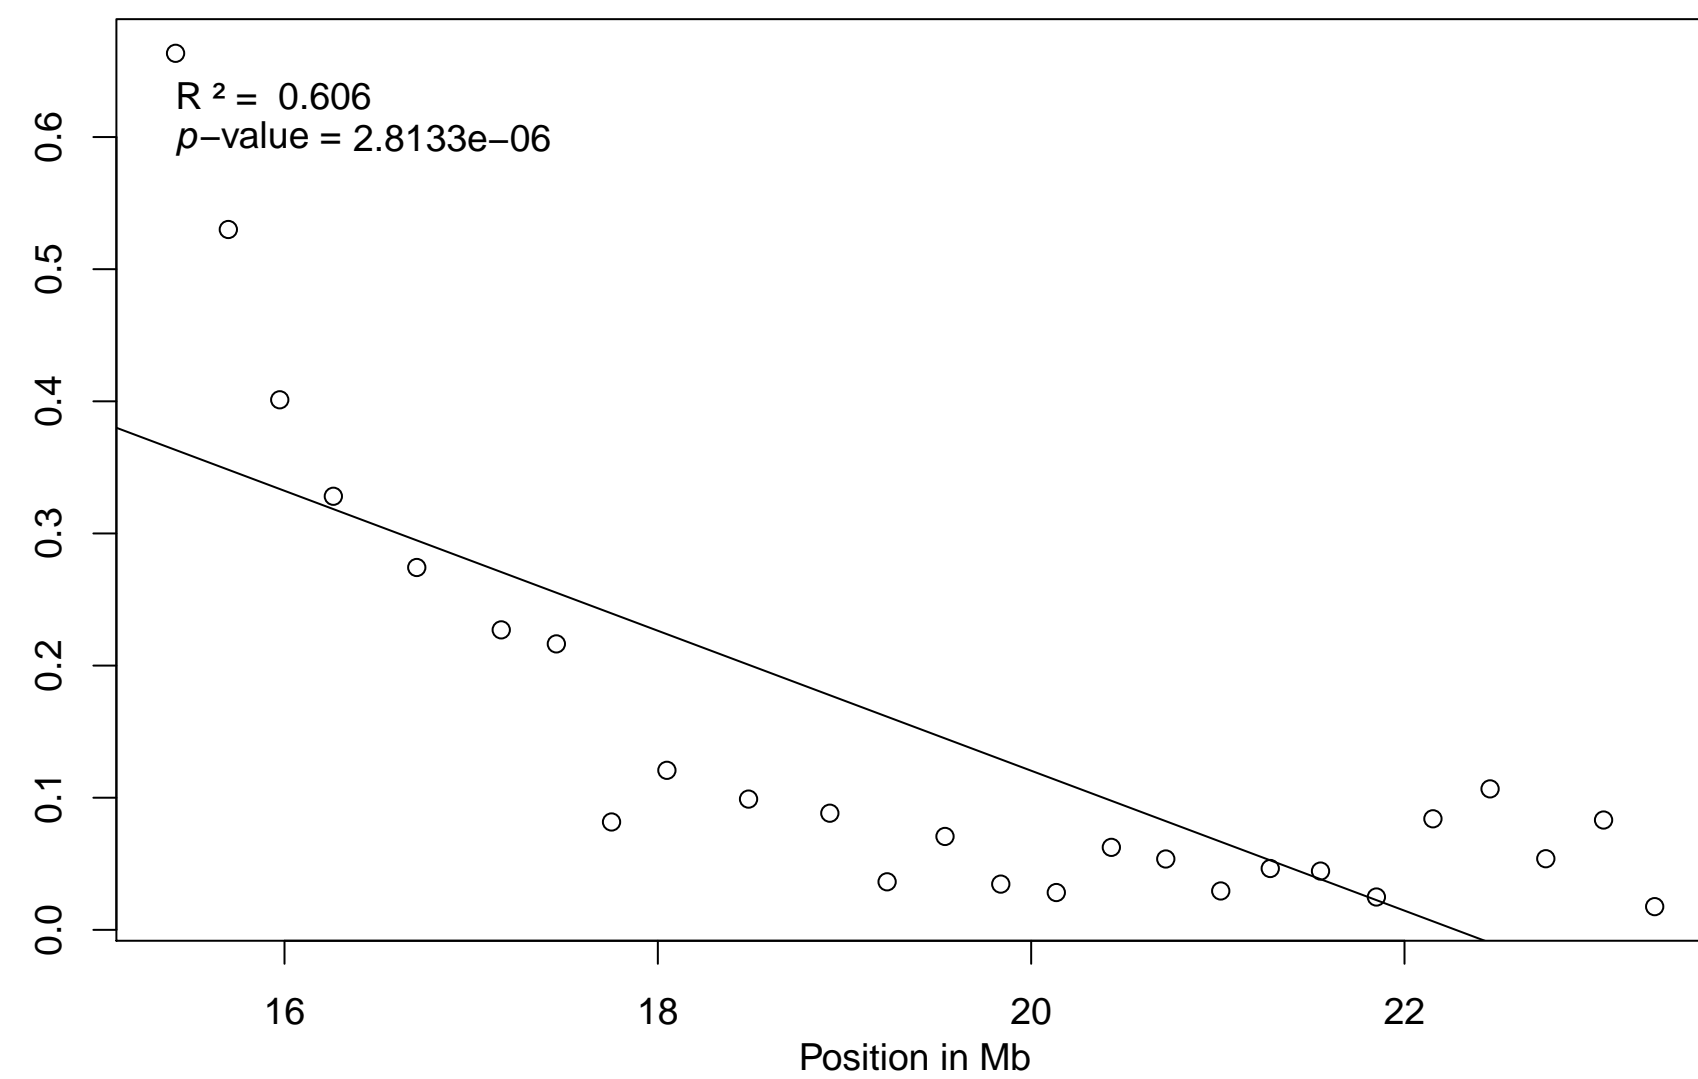**Chromosome 4 TE density left arm**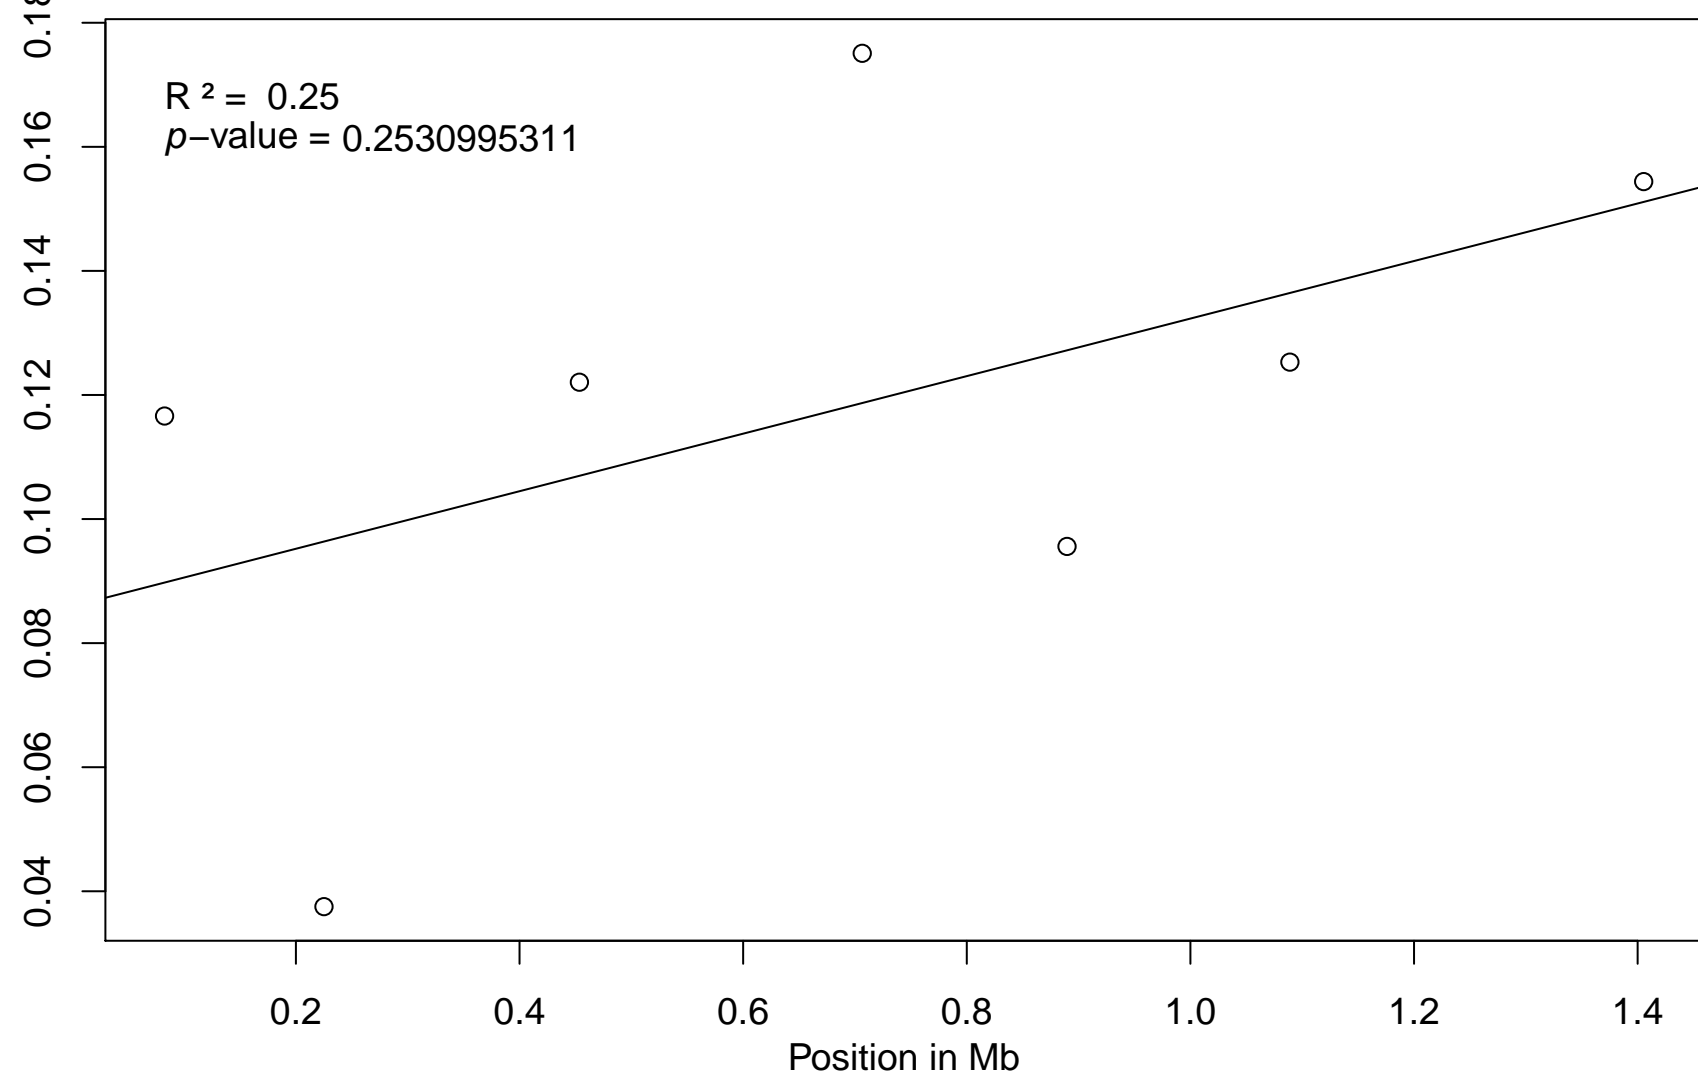**Chromosome 4 TE density right arm**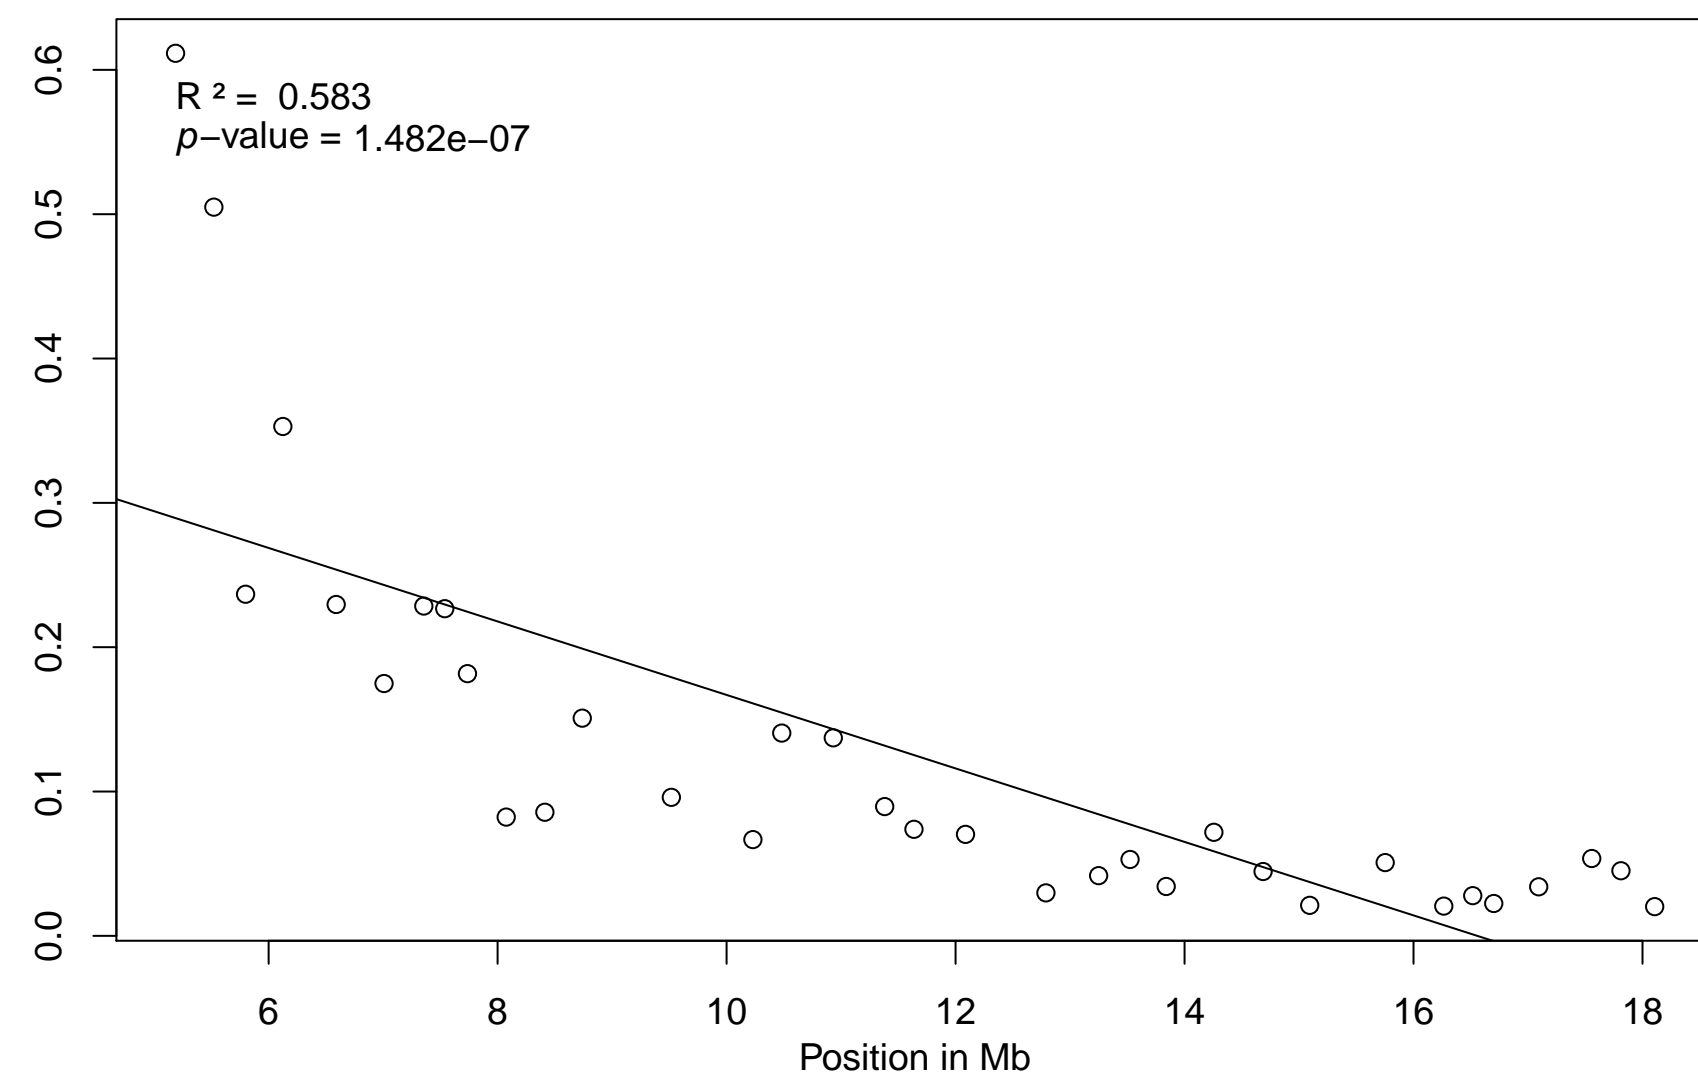**Chromosome 5 TE density left arm**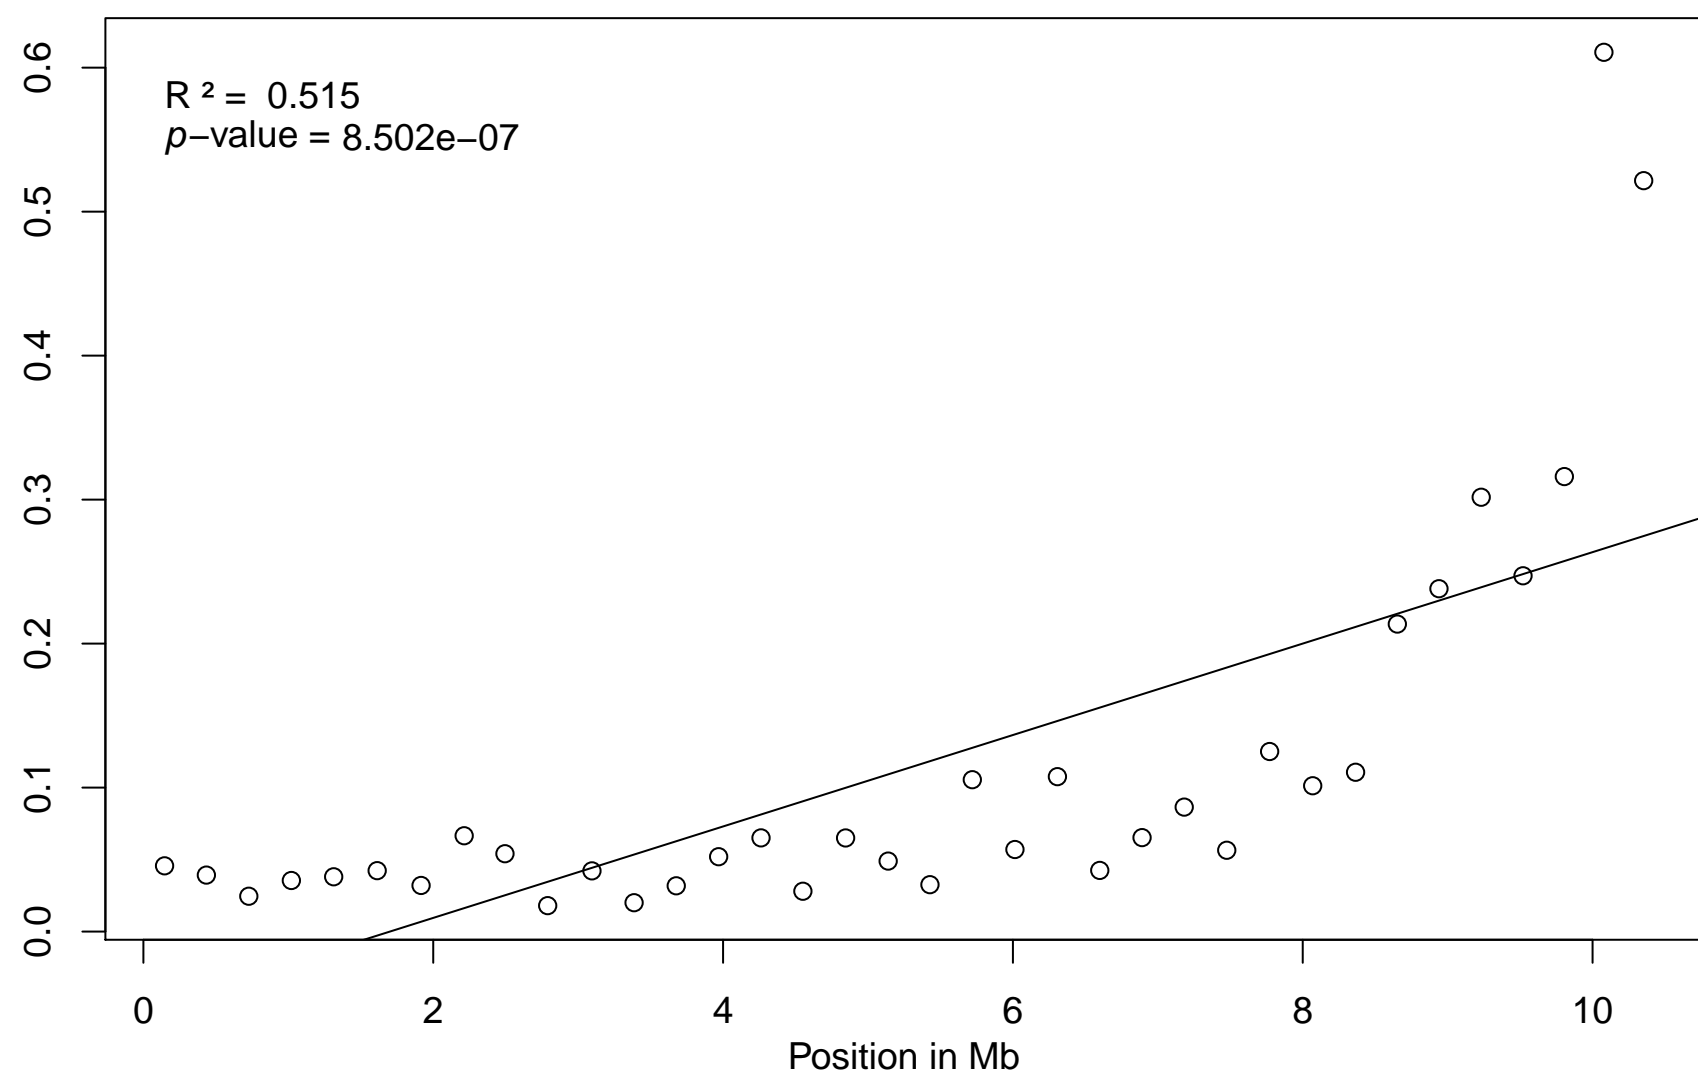**Chromosome 5 TE density right arm**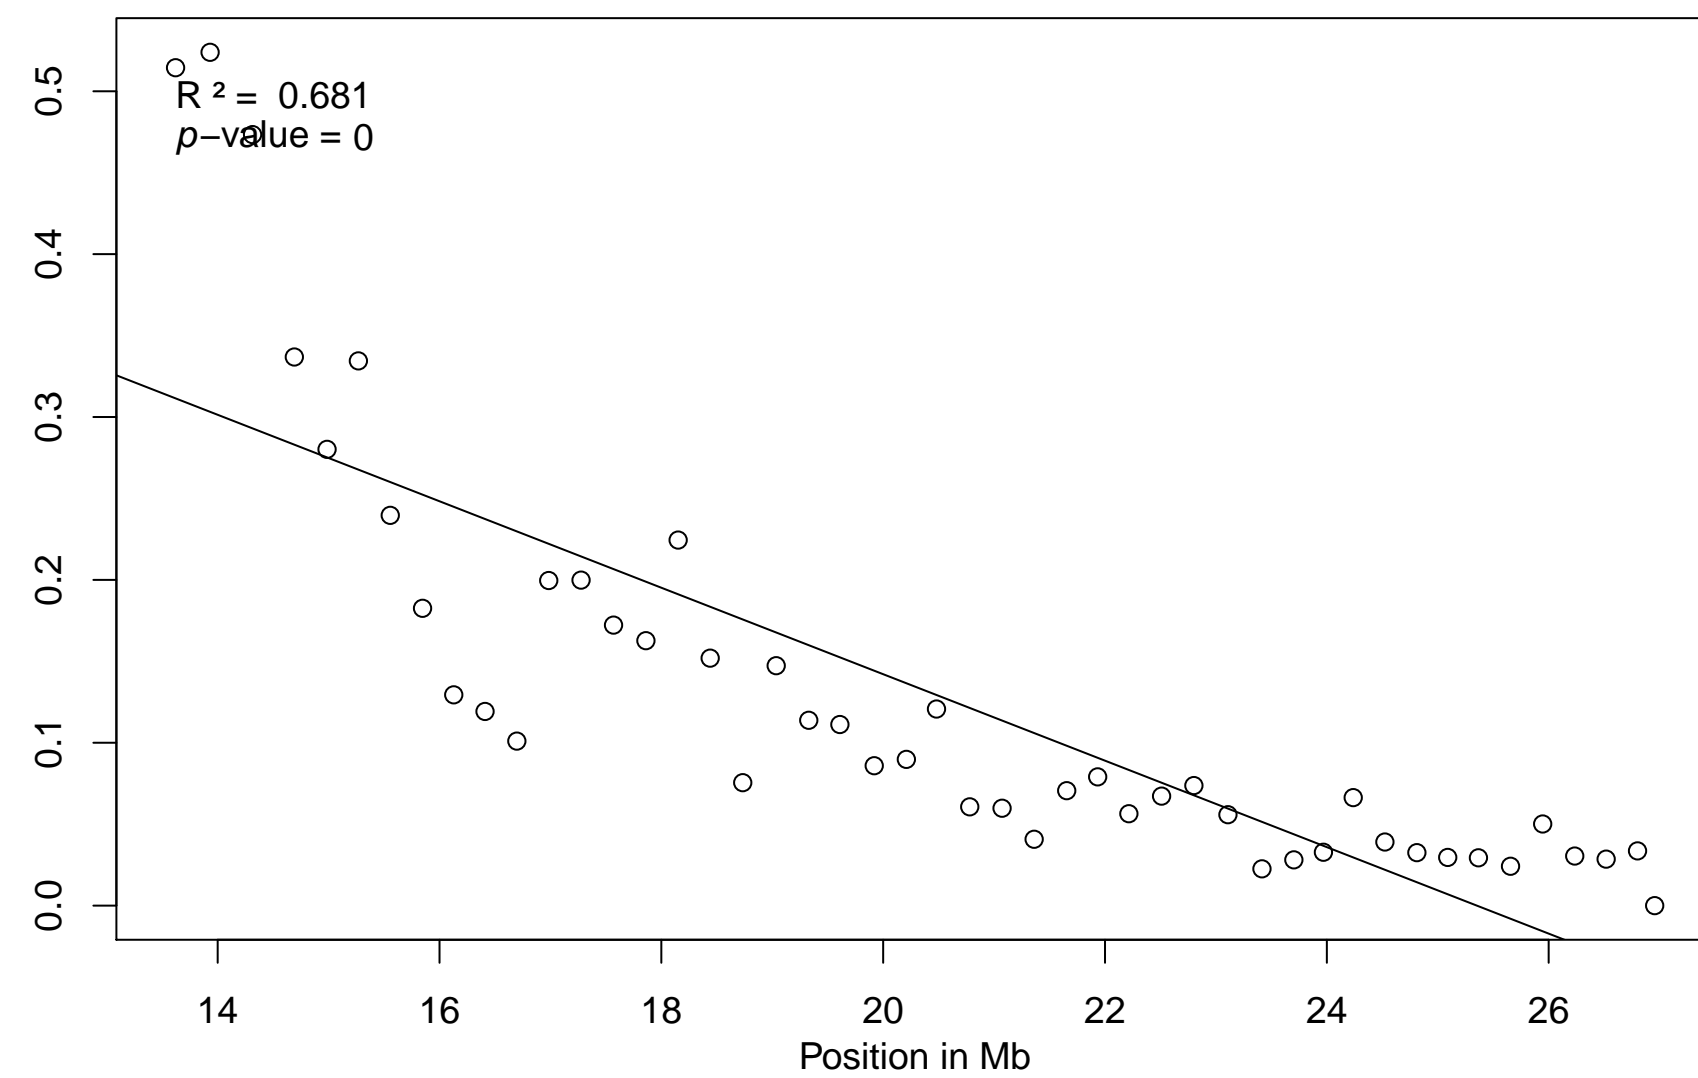

**Male Chr 1 removing 30 % of total length VALUES TE density**

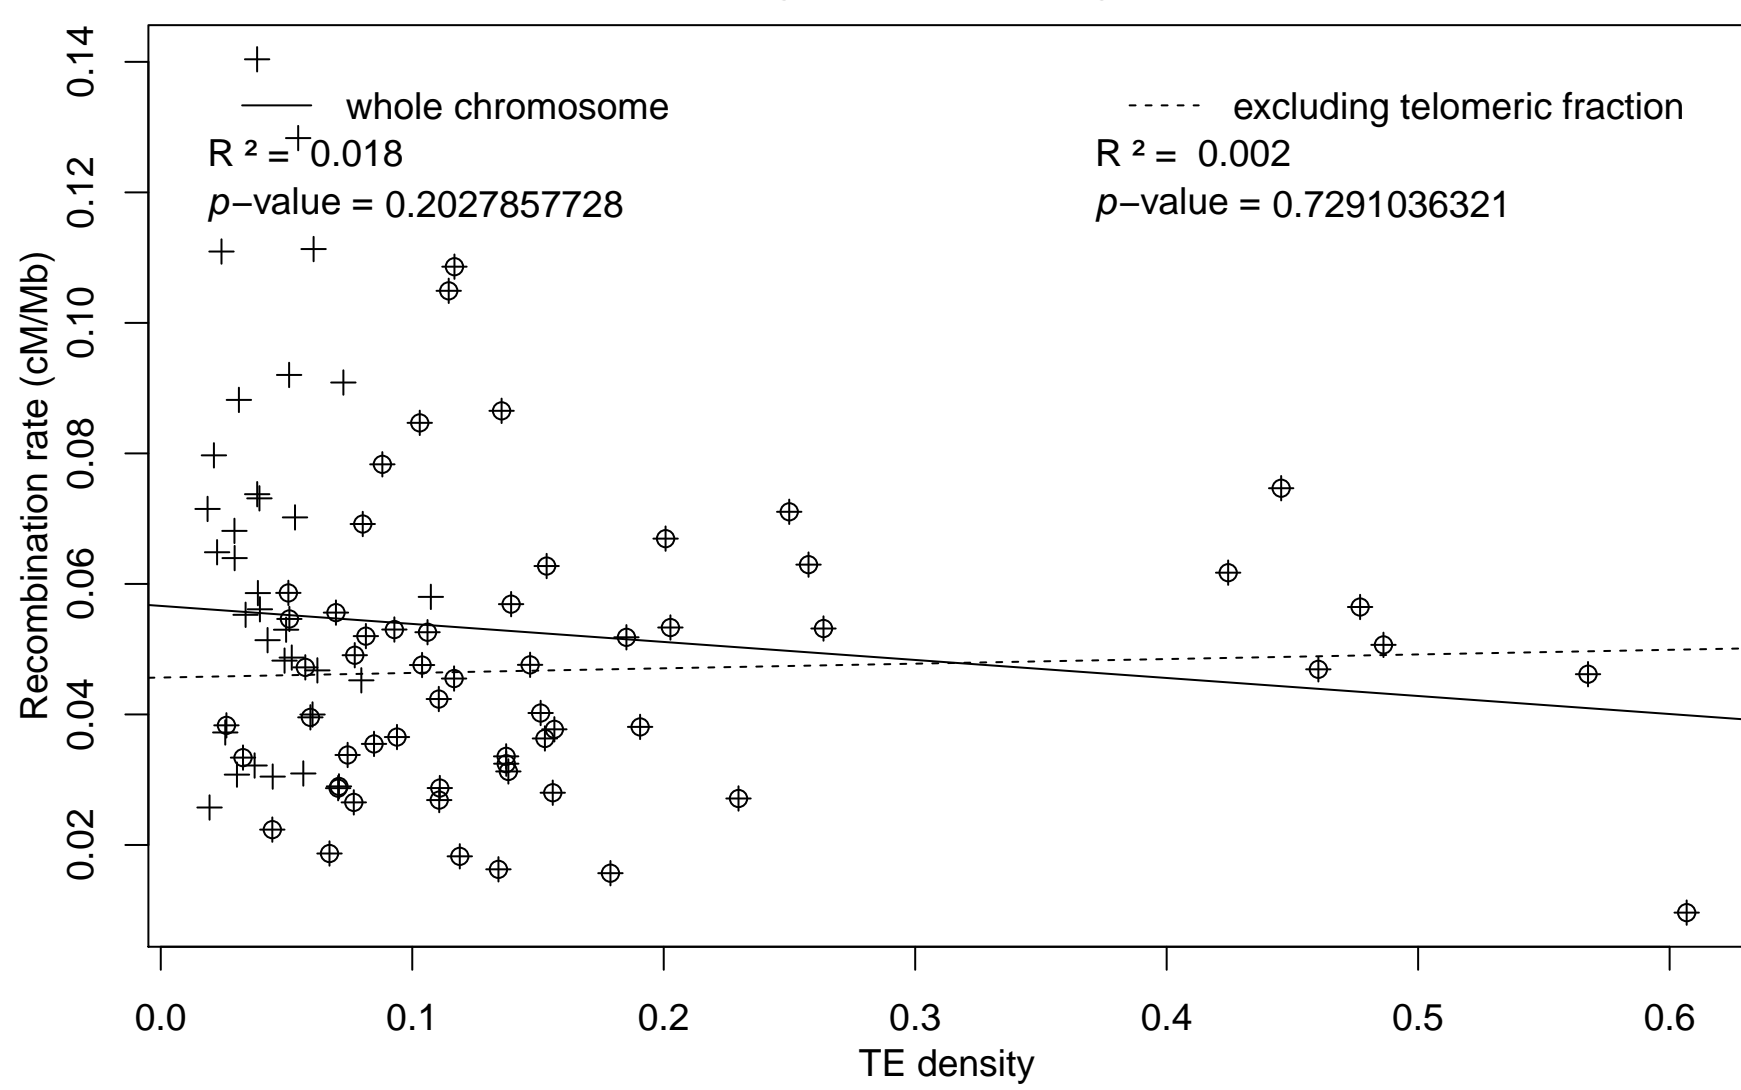

**Female Chr 1 removing 30 % of total length VALUES TE density**

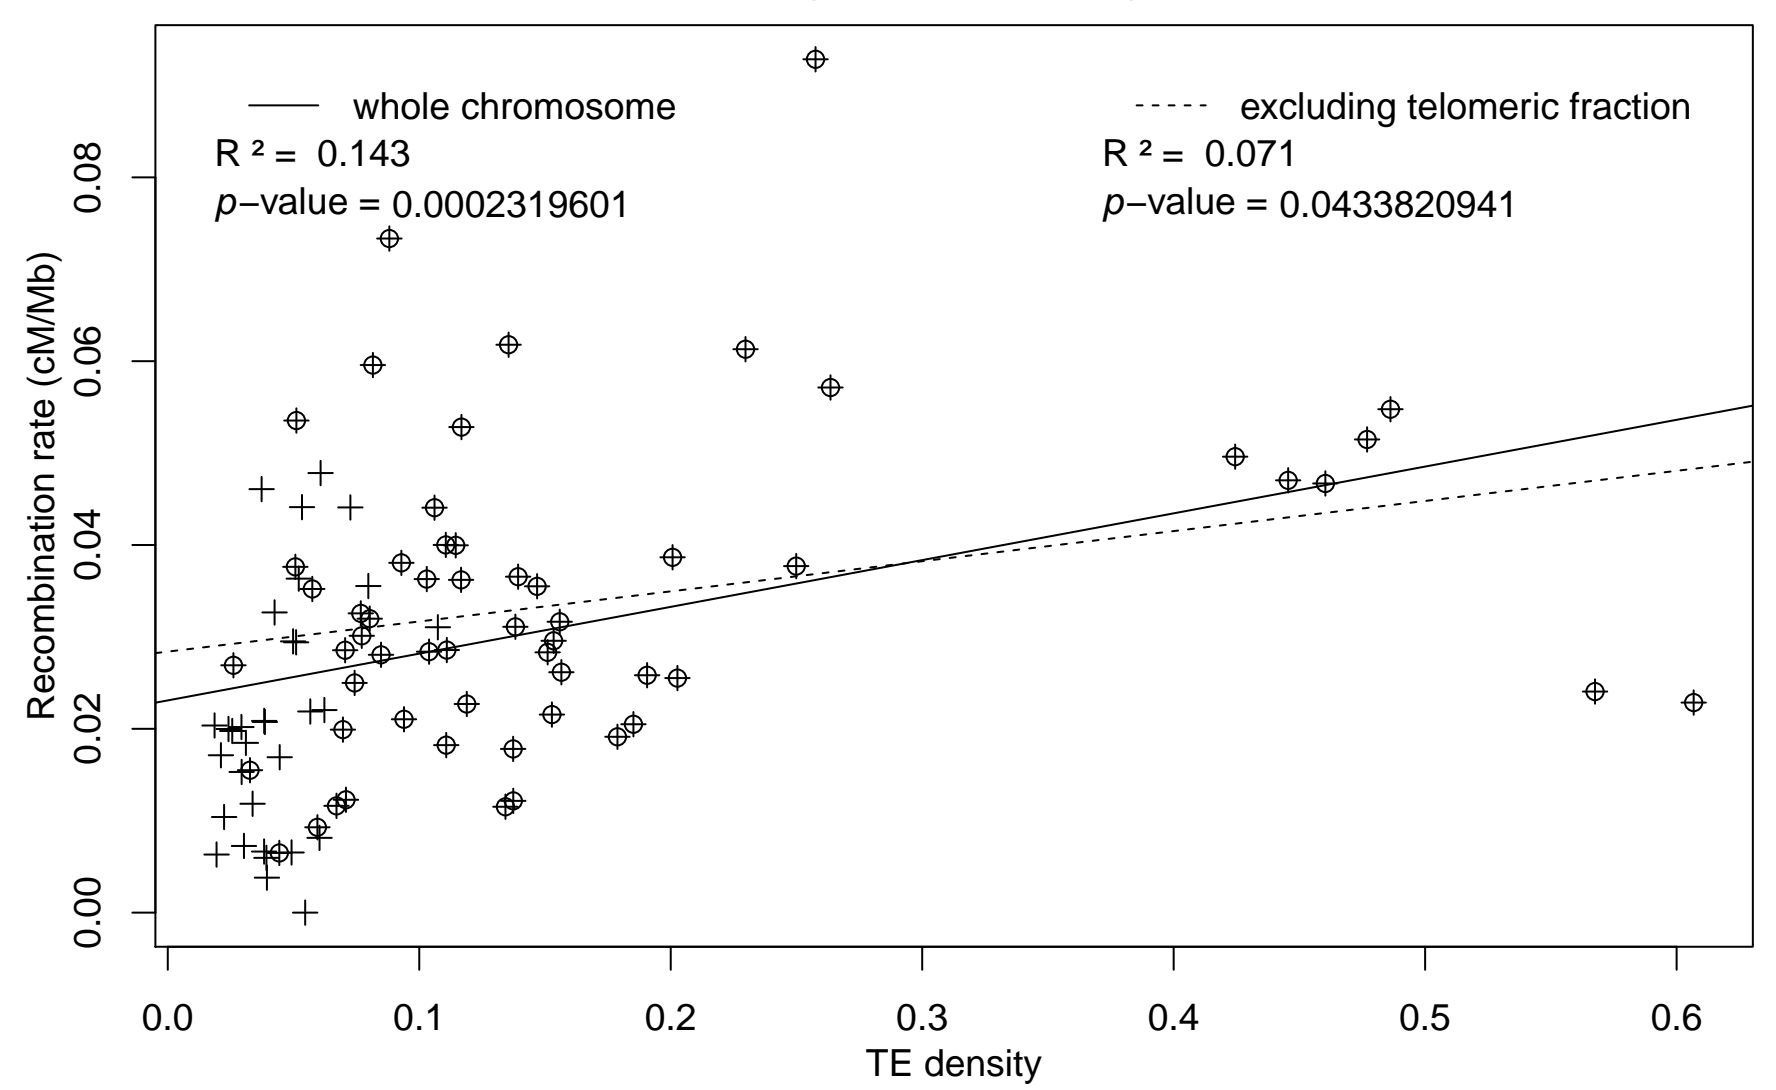

**Male Chr 2 removing 30 % of total length VALUES TE density**

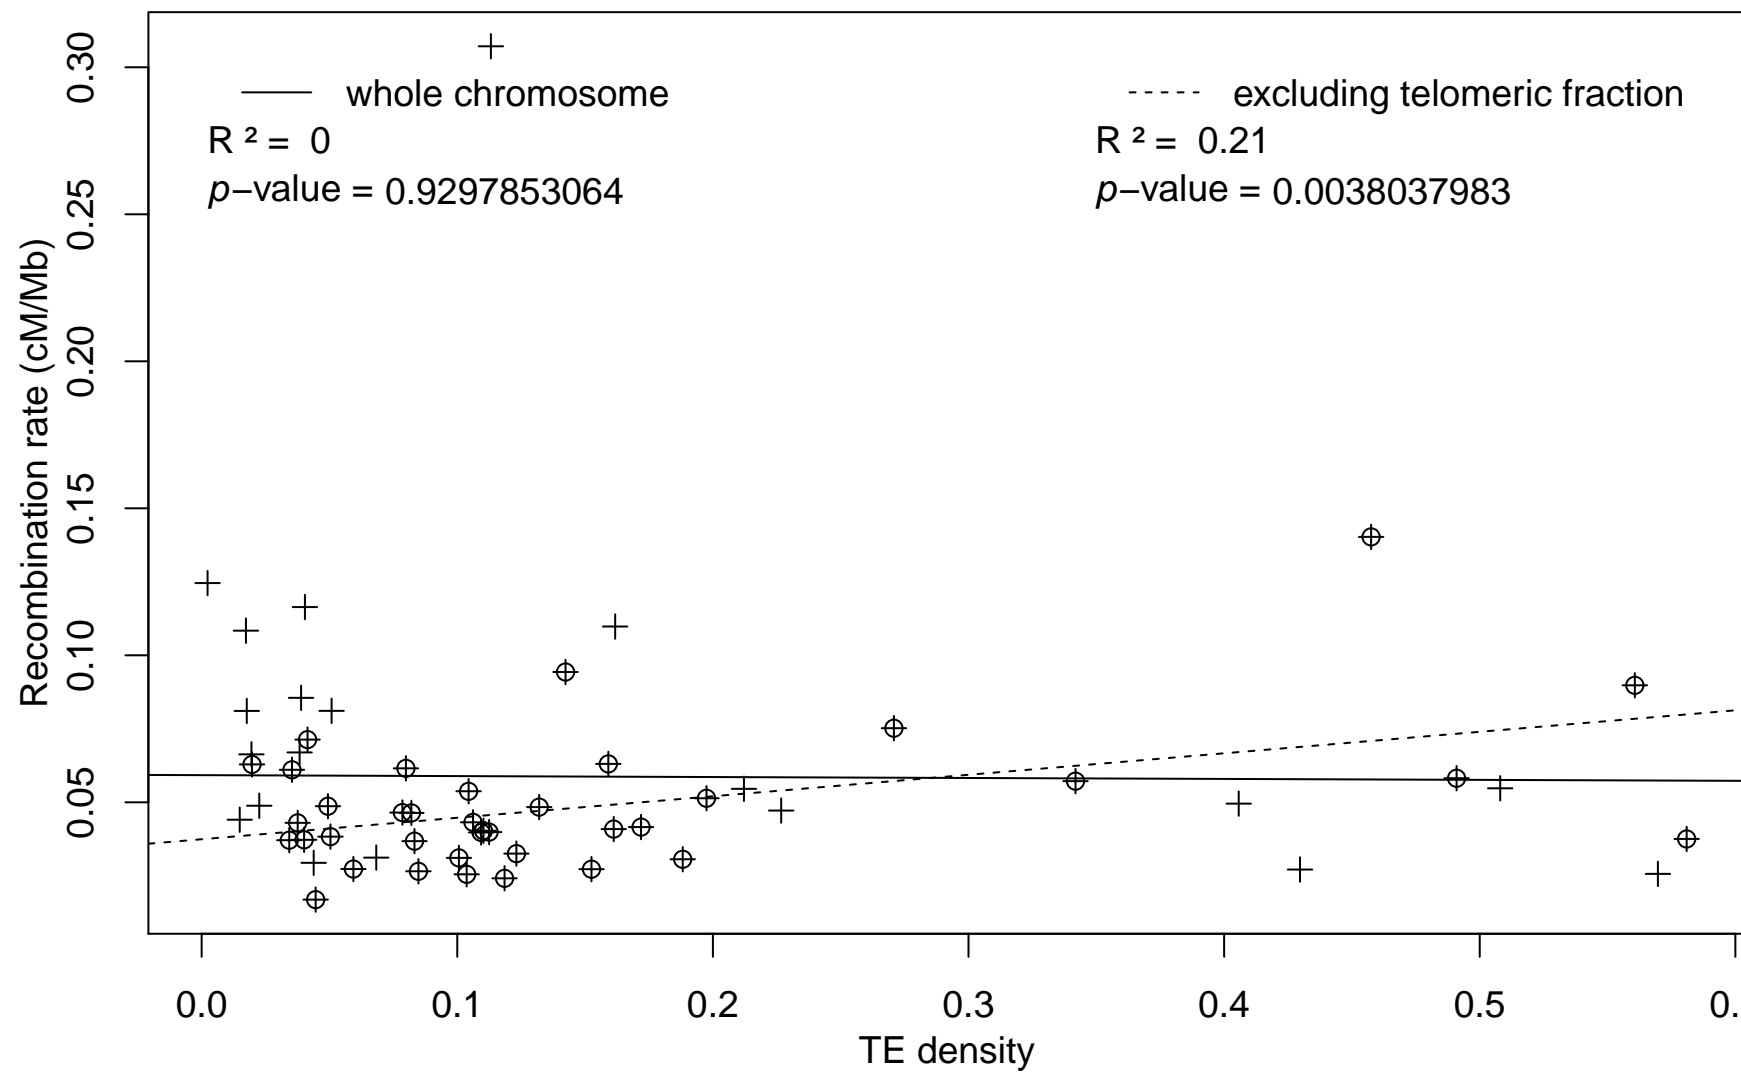

**Female Chr 2 removing 30 % of total length VALUES TE density**

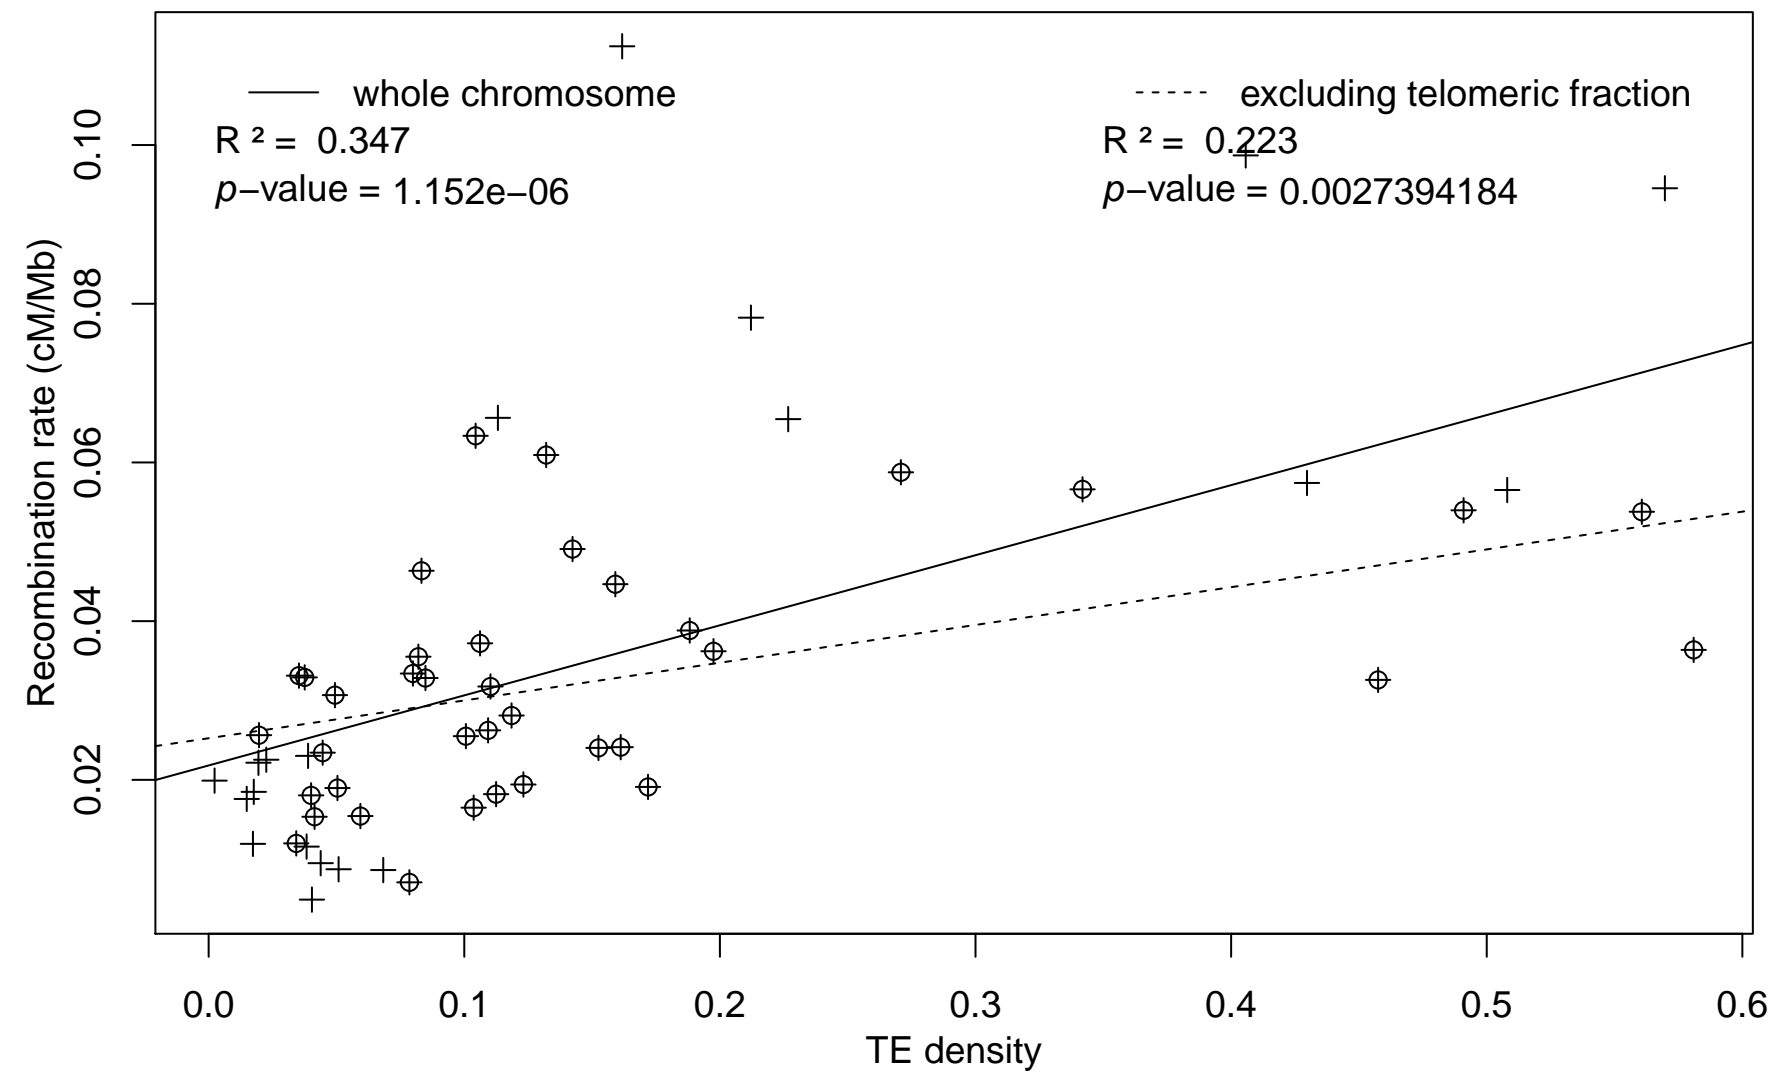

**Male Chr 3 removing 30 % of total length VALUES TE density**

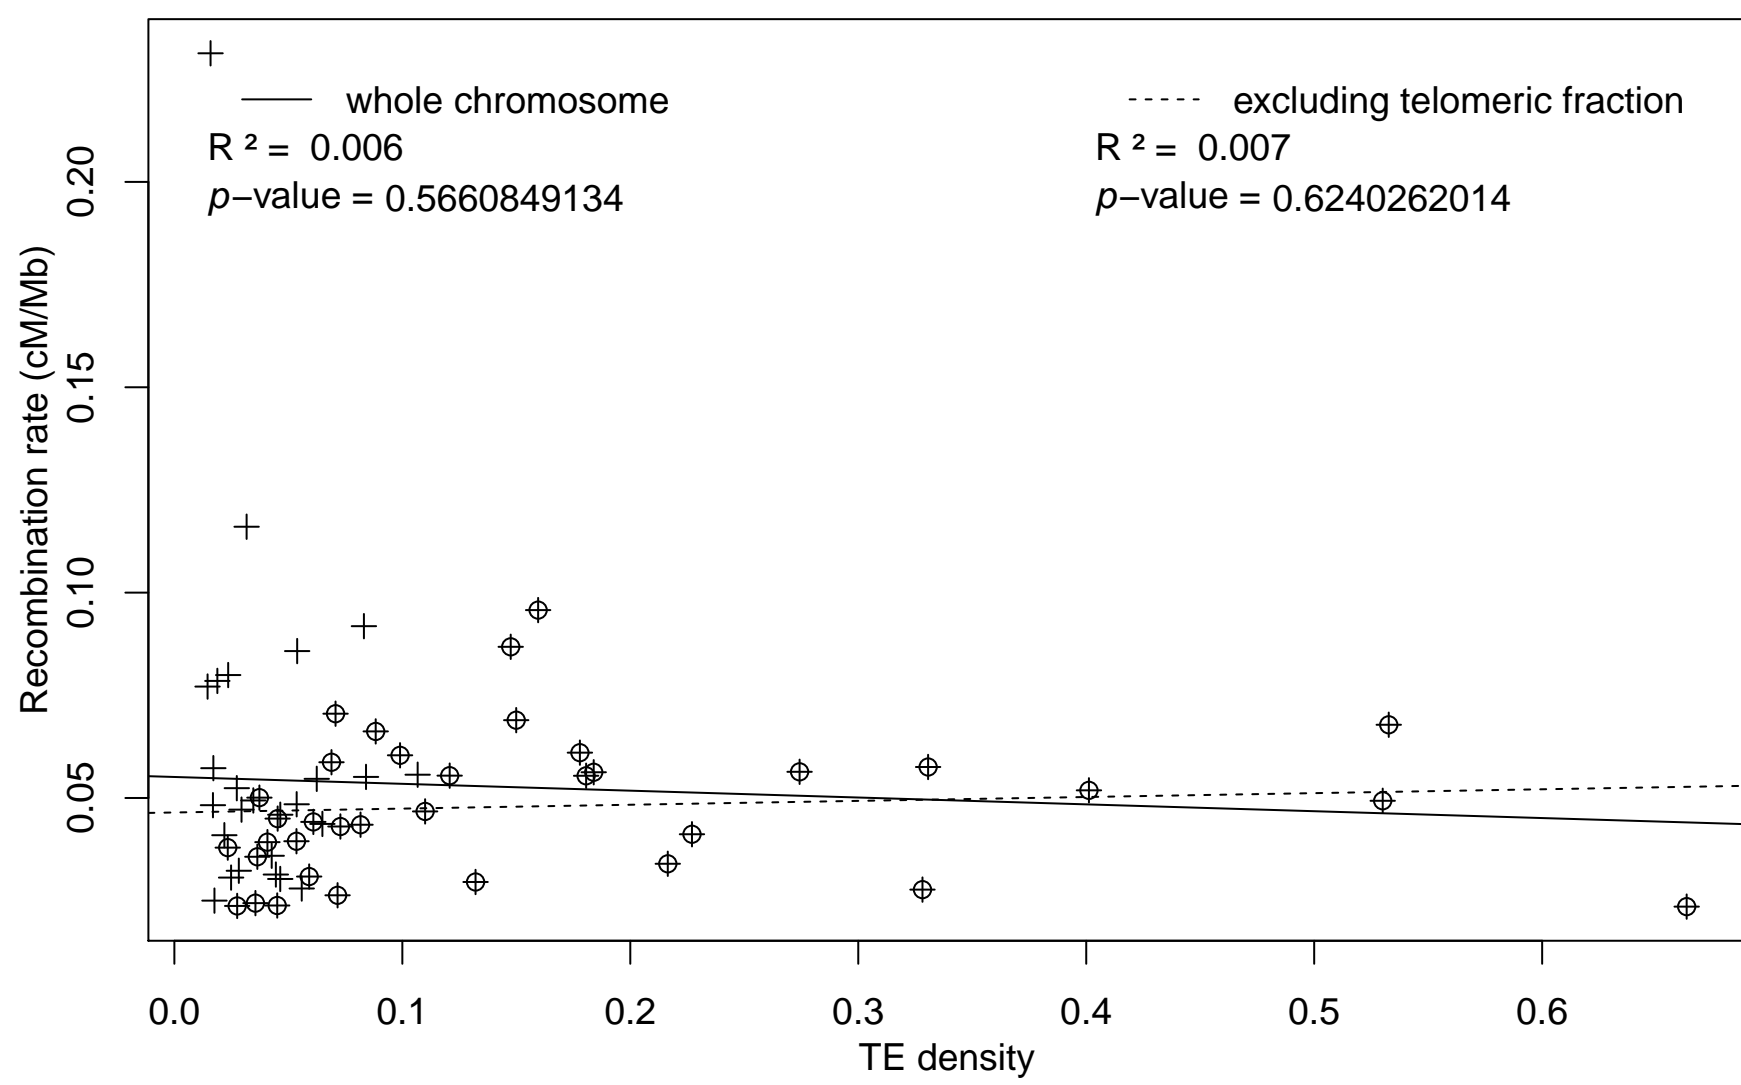

**Female Chr 3 removing 30 % of total length VALUES TE density**

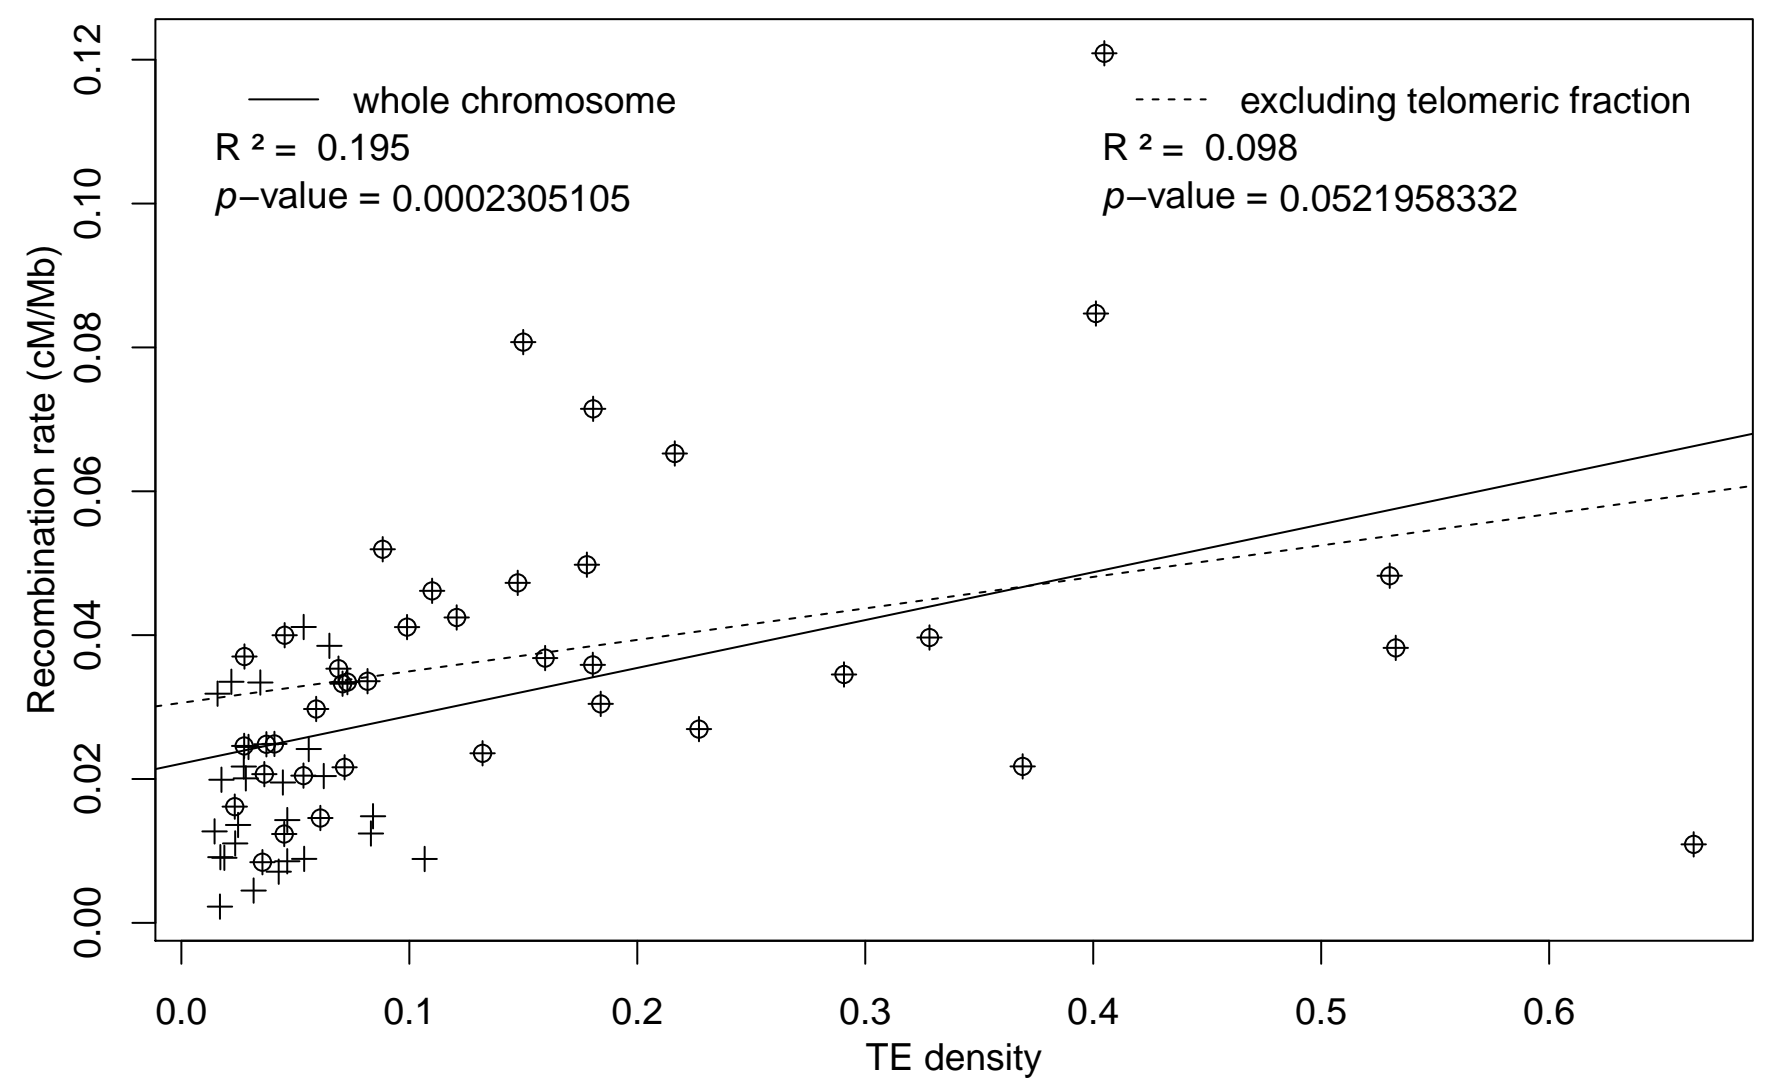

**Male Chr 4 removing 30 % of total length VALUES TE density**

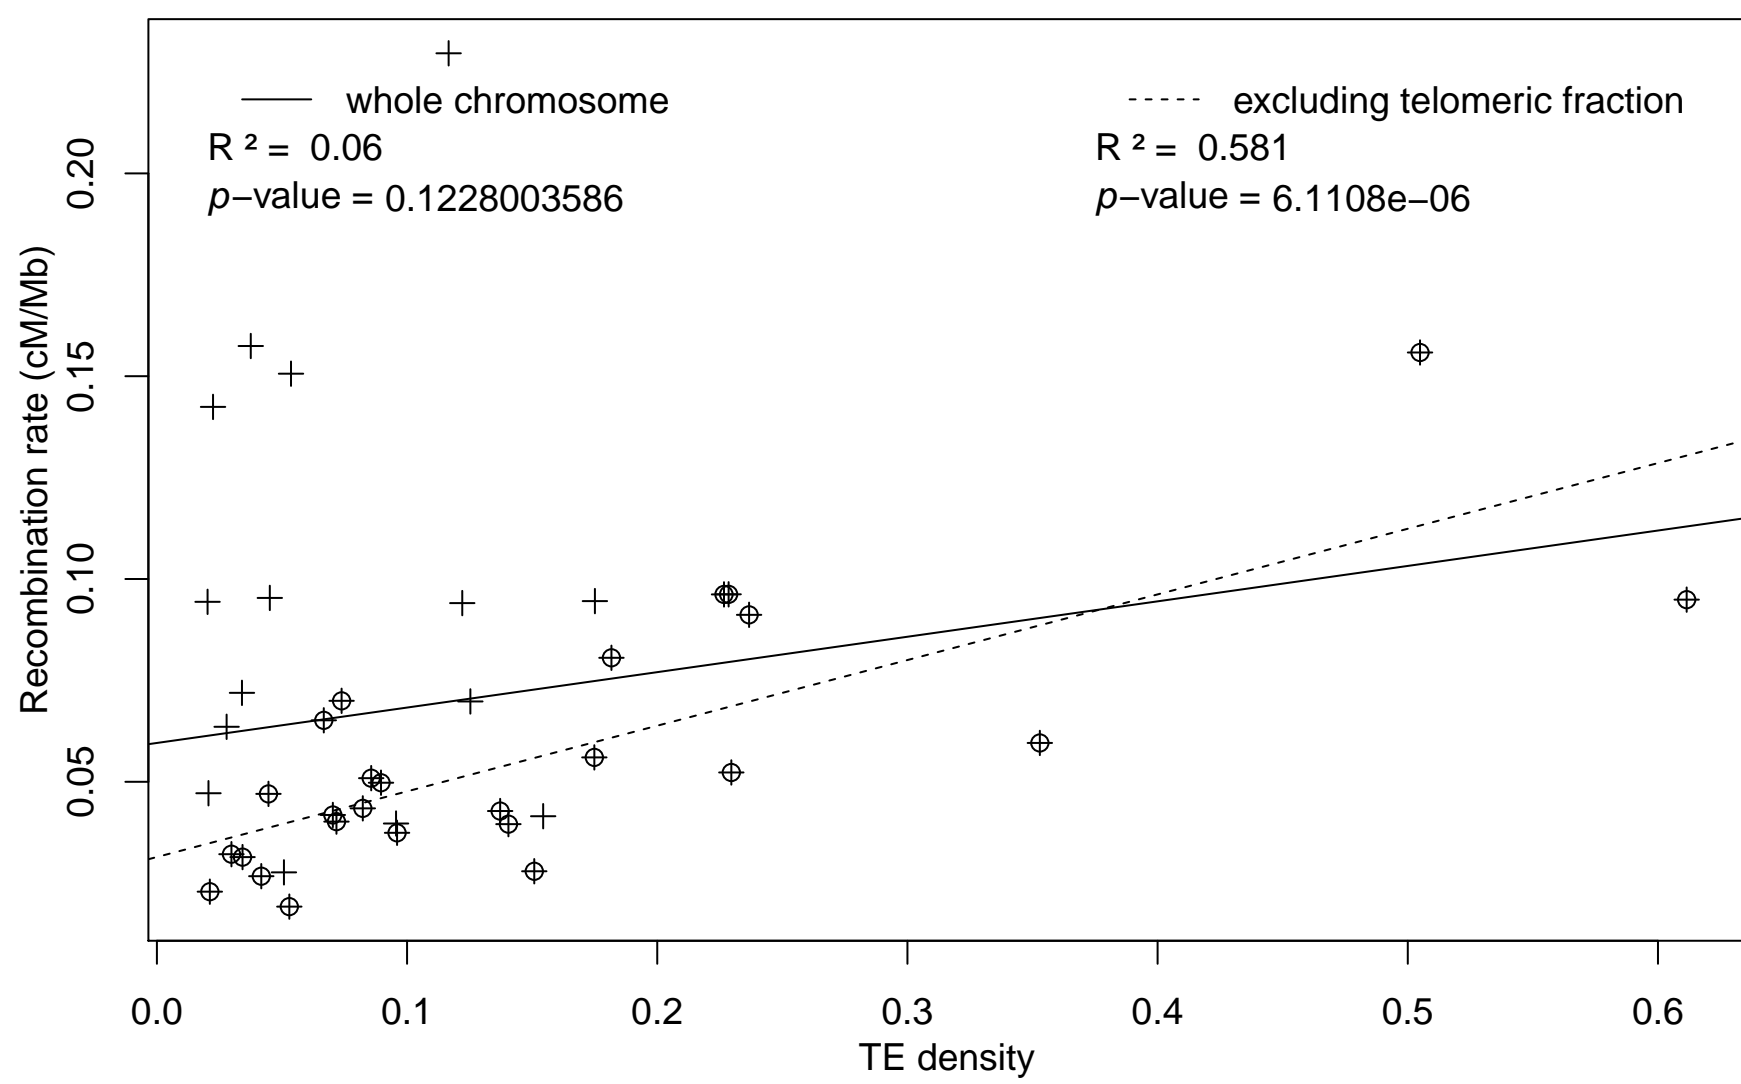

**Female Chr 4 removing 30 % of total length VALUES TE density**

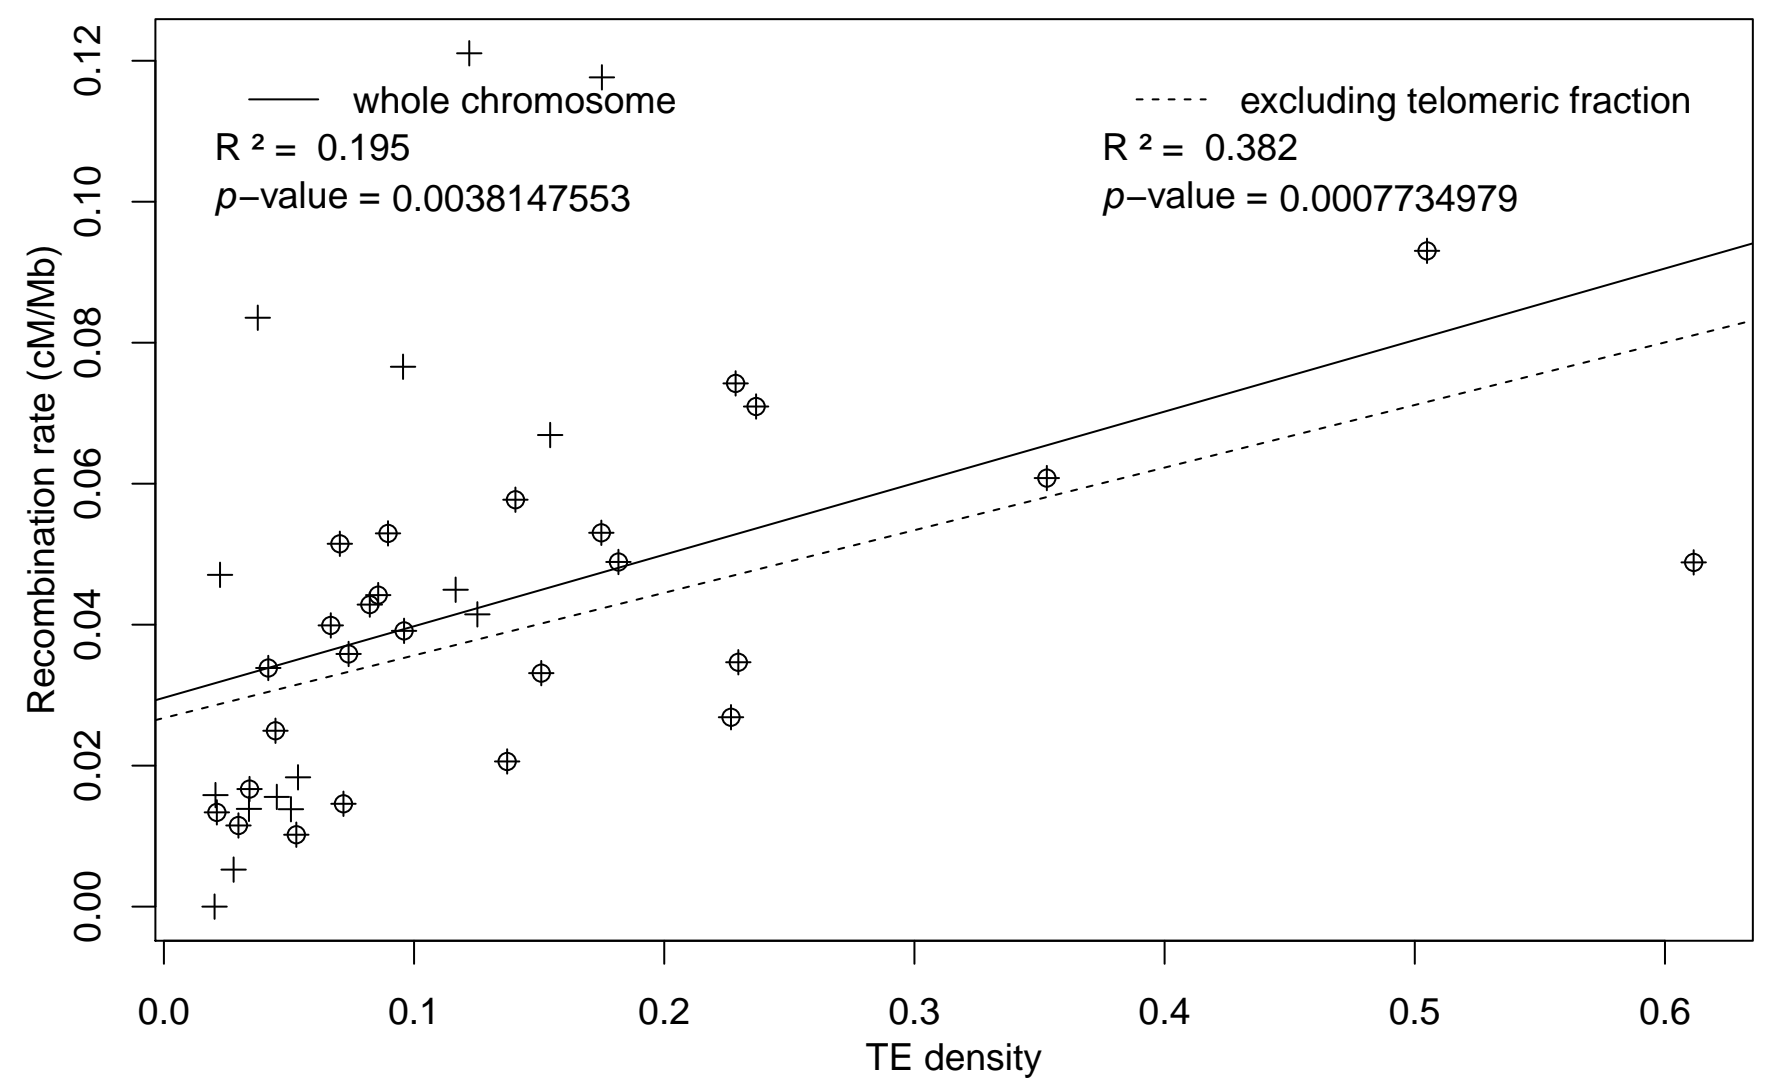

**Male Chr 5 removing 30 % of total length VALUES TE density**

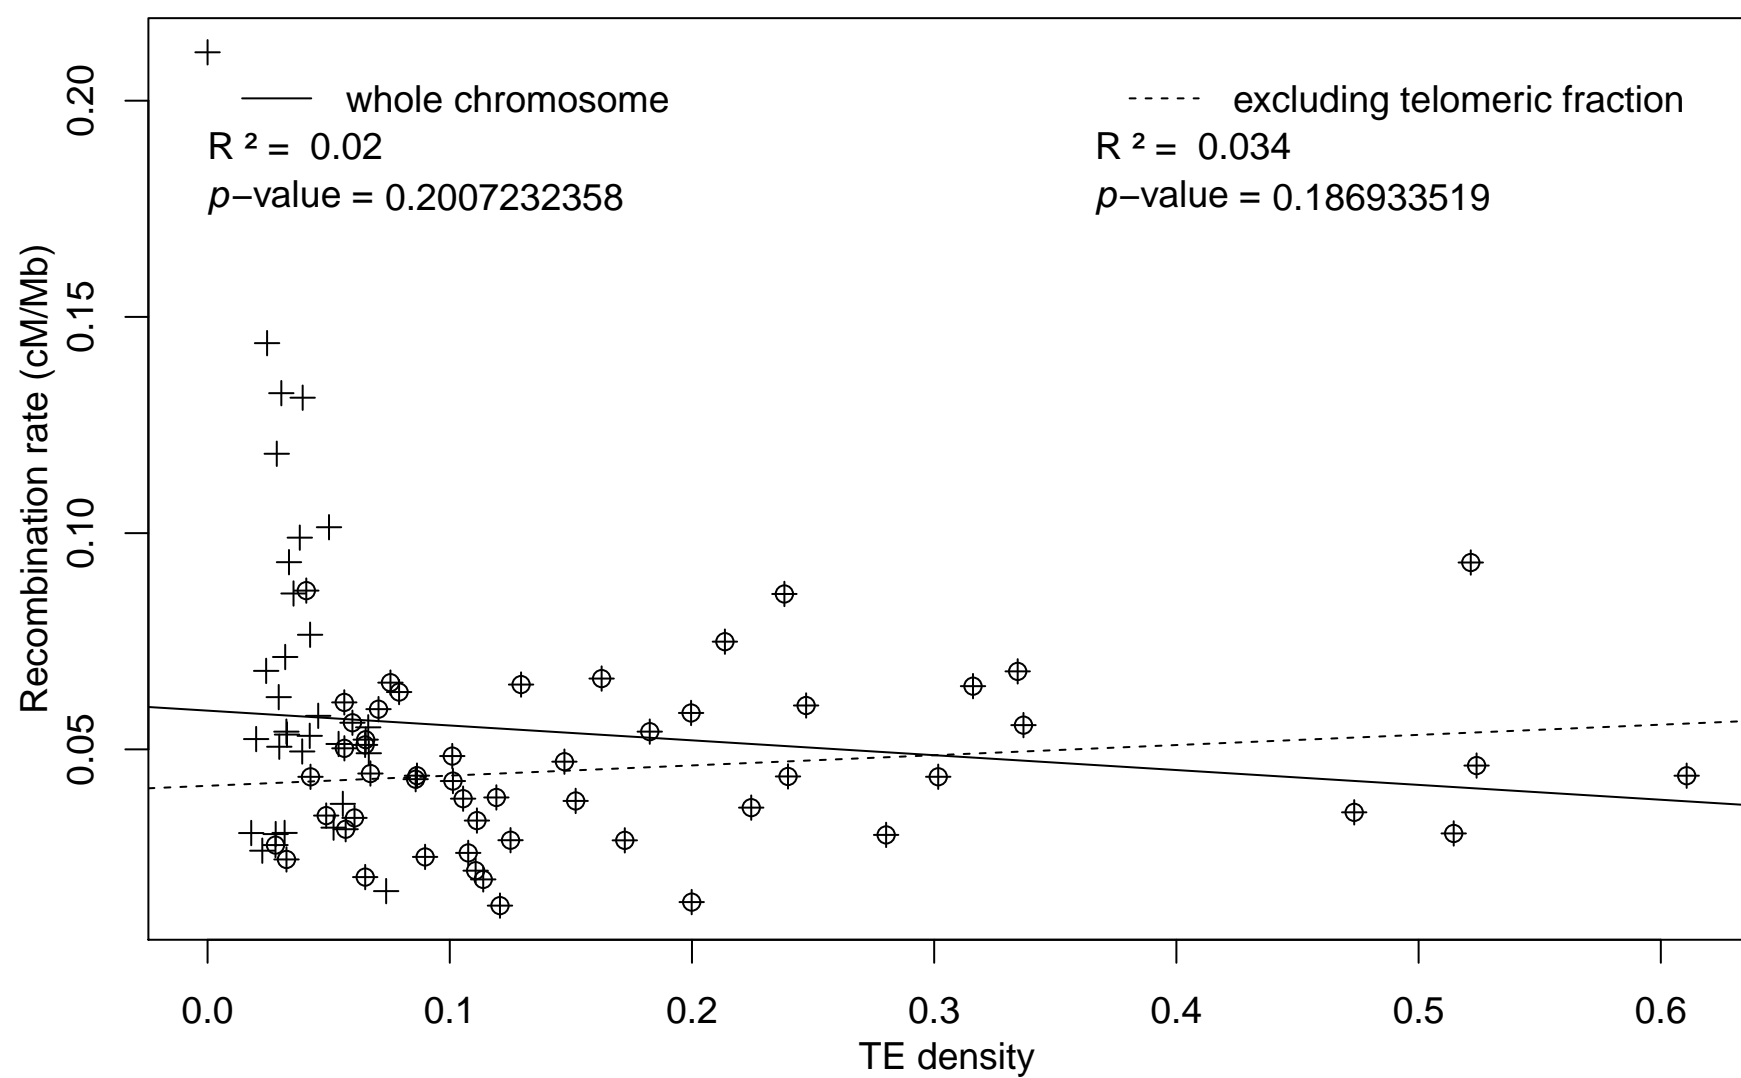

**Female Chr 5 removing 30 % of total length VALUES TE density**

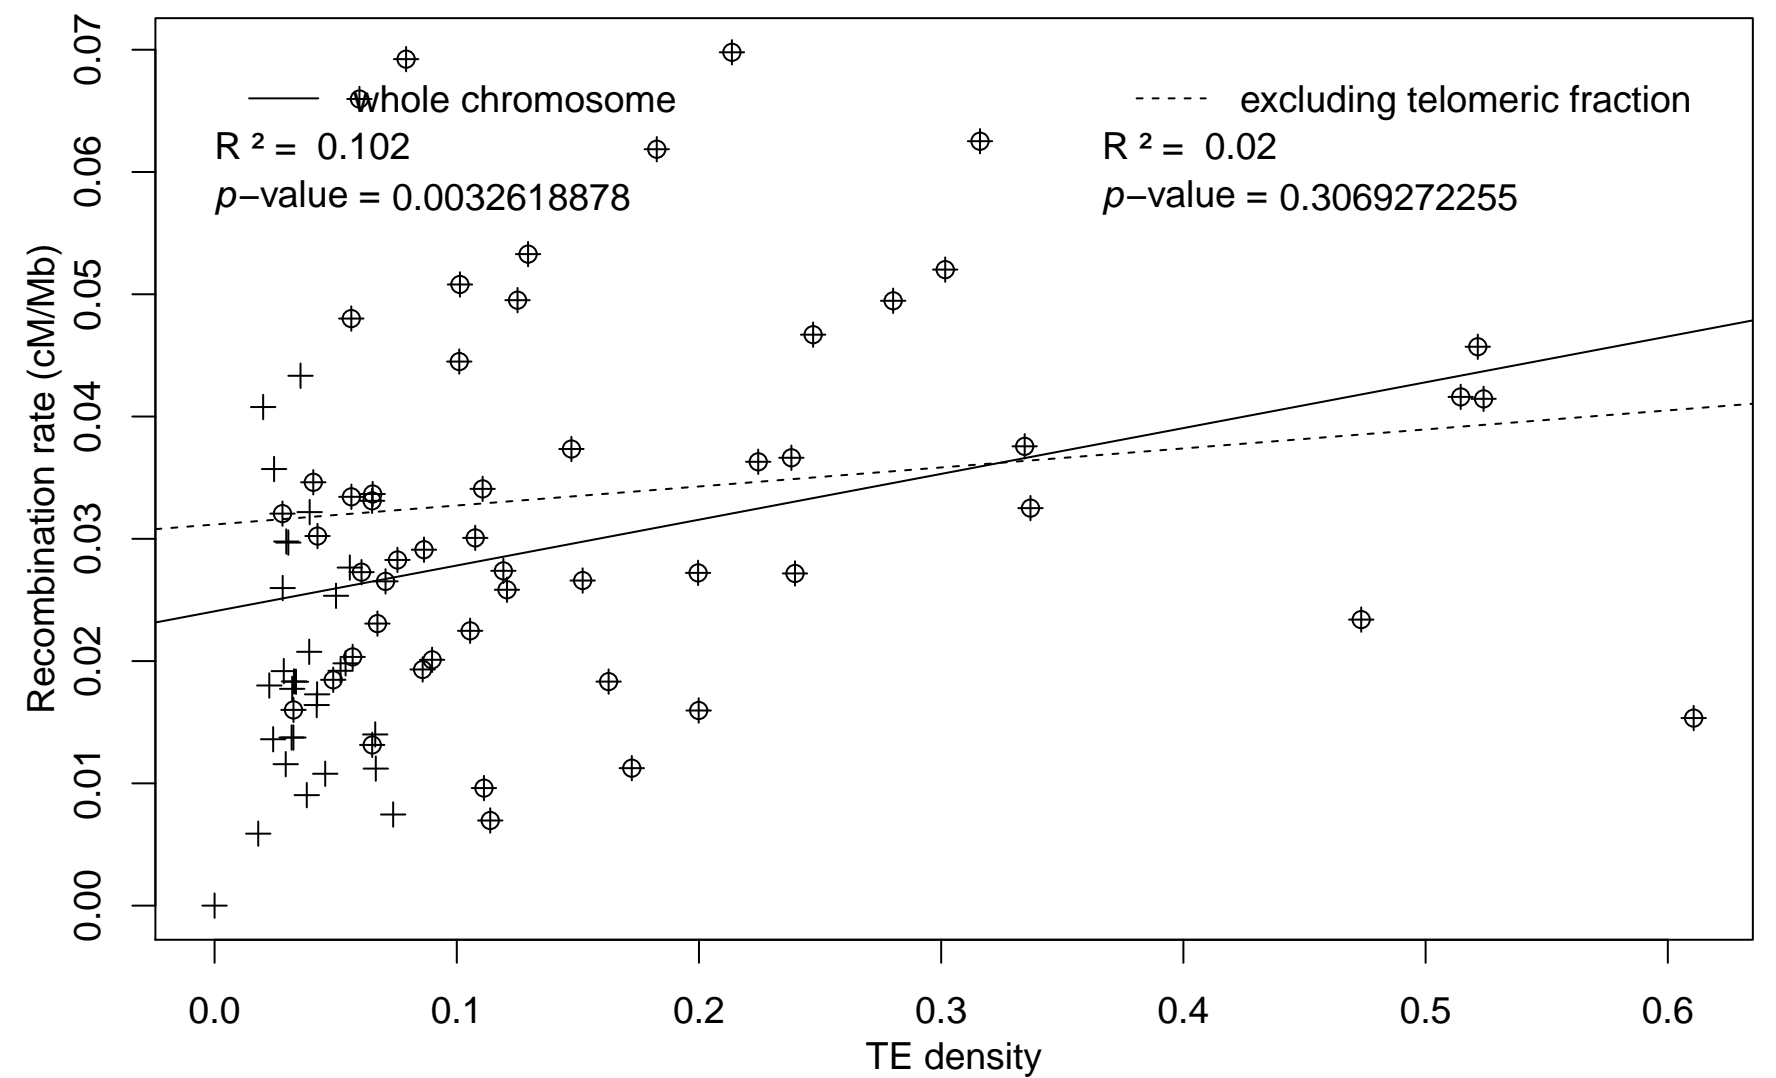

**Male Chr 1 removing 50 % of total length VALUES TE density**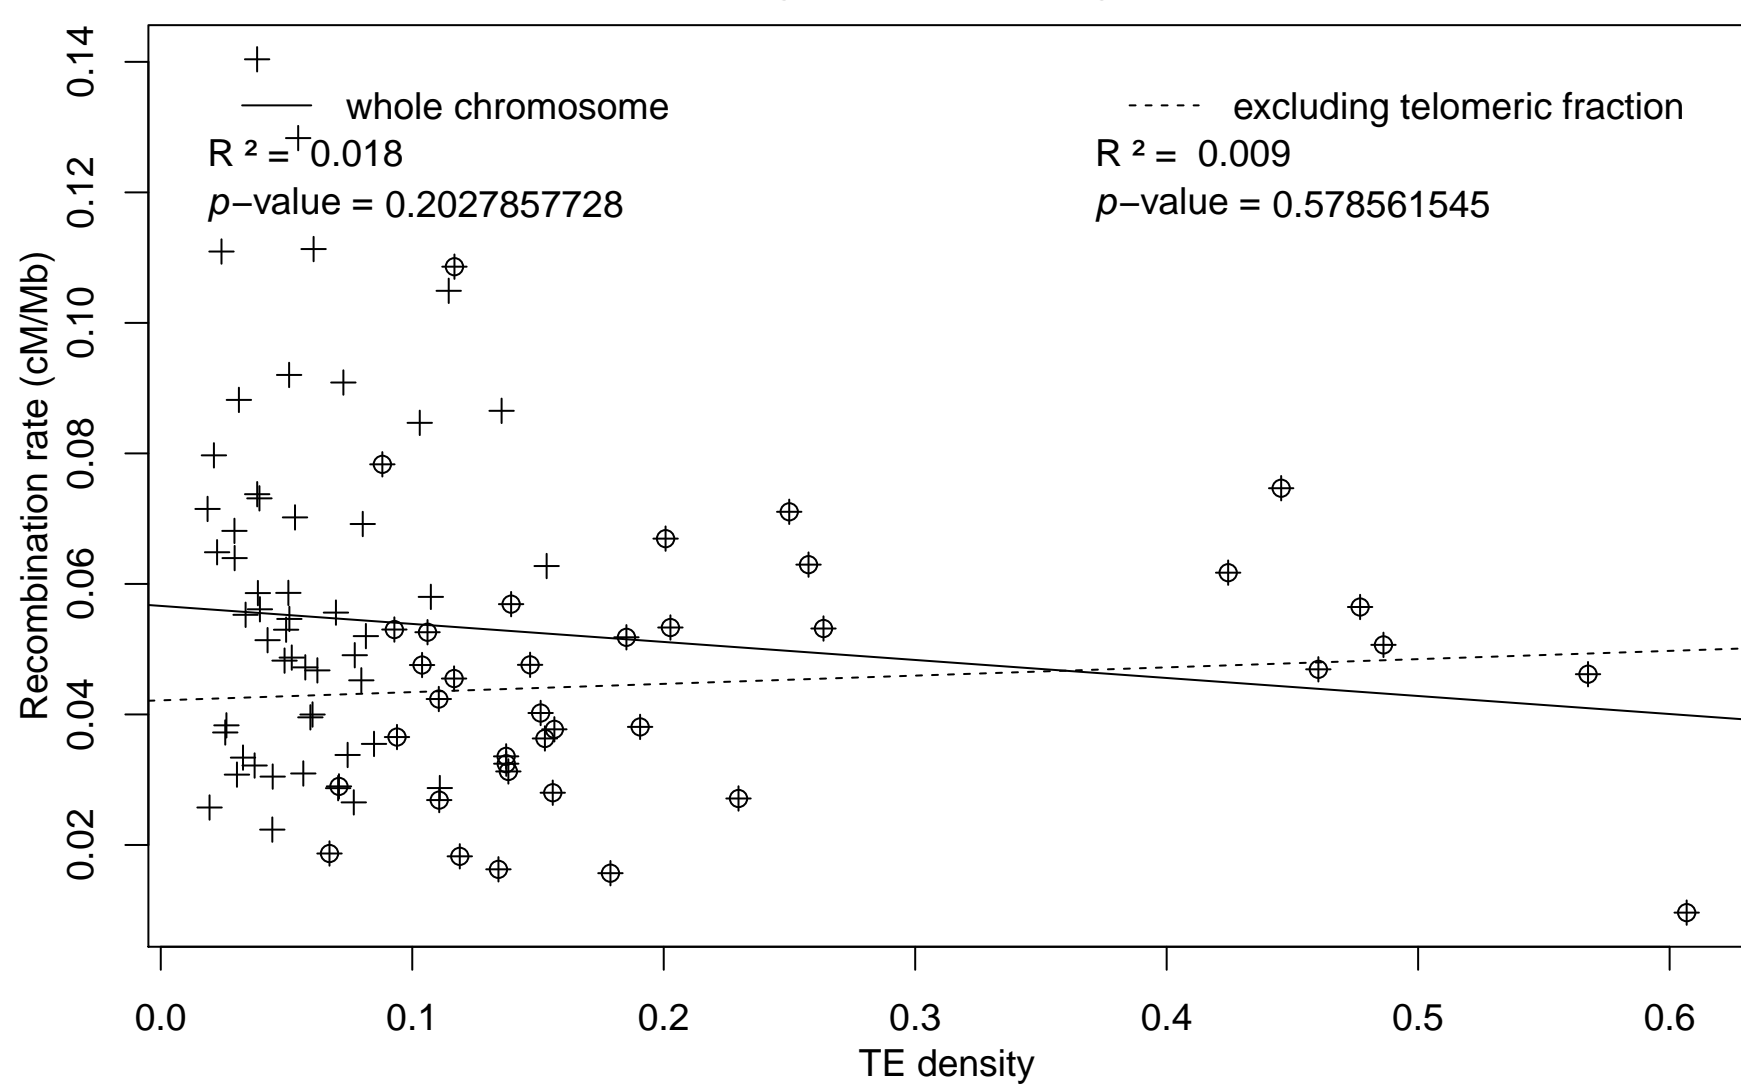**Female Chr 1 removing 50 % of total length VALUES TE density**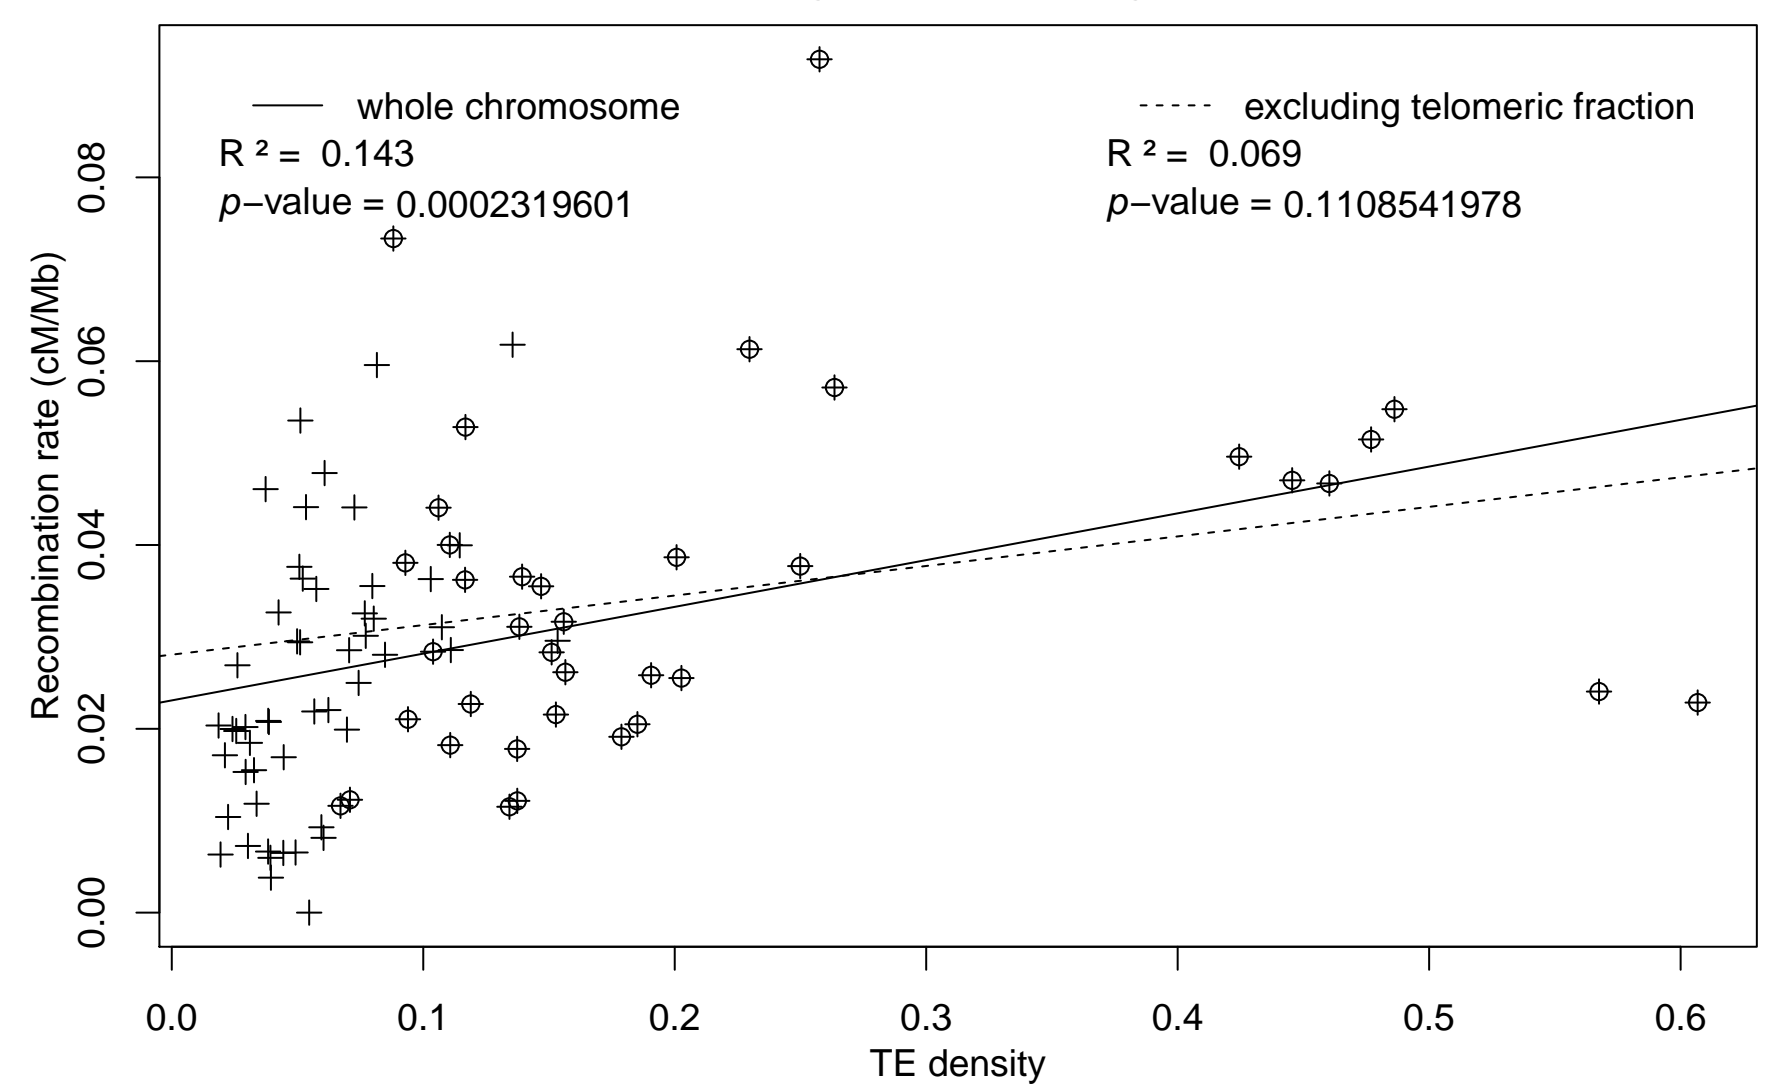**Male Chr 2 removing 50 % of total length VALUES TE density**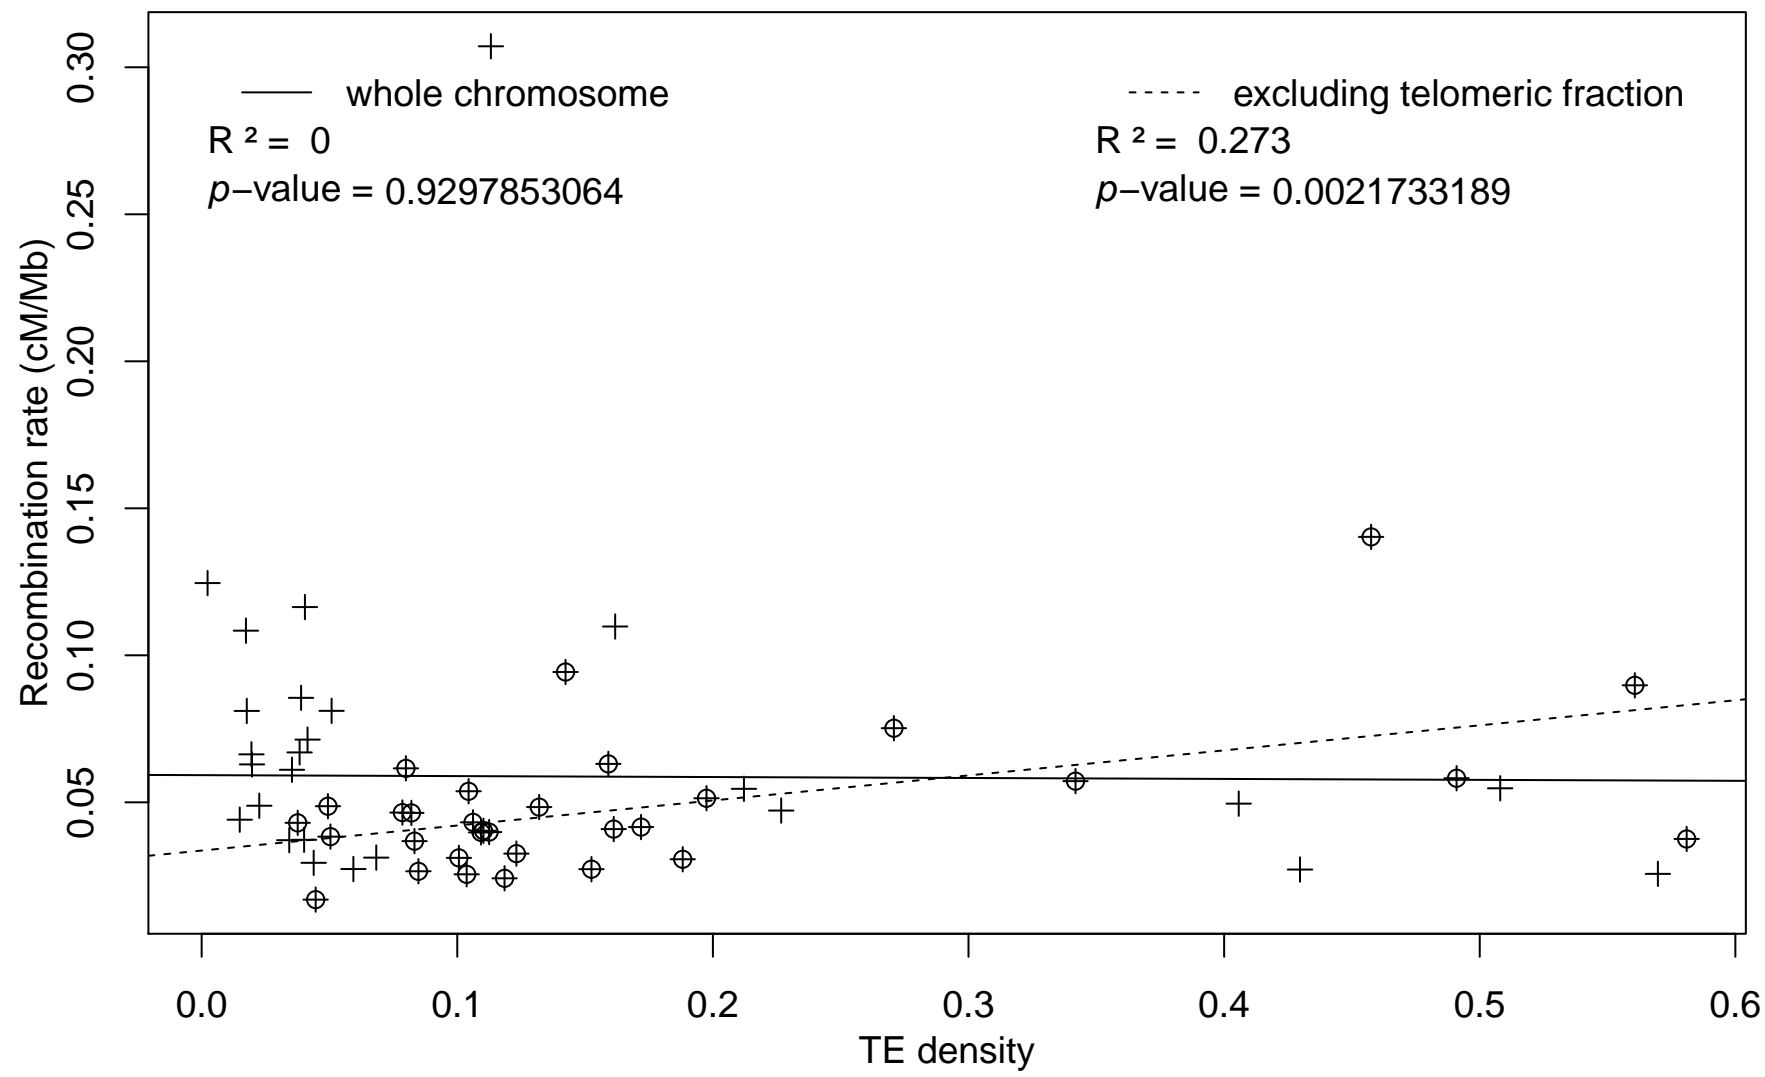**Female Chr 2 removing 50 % of total length VALUES TE density**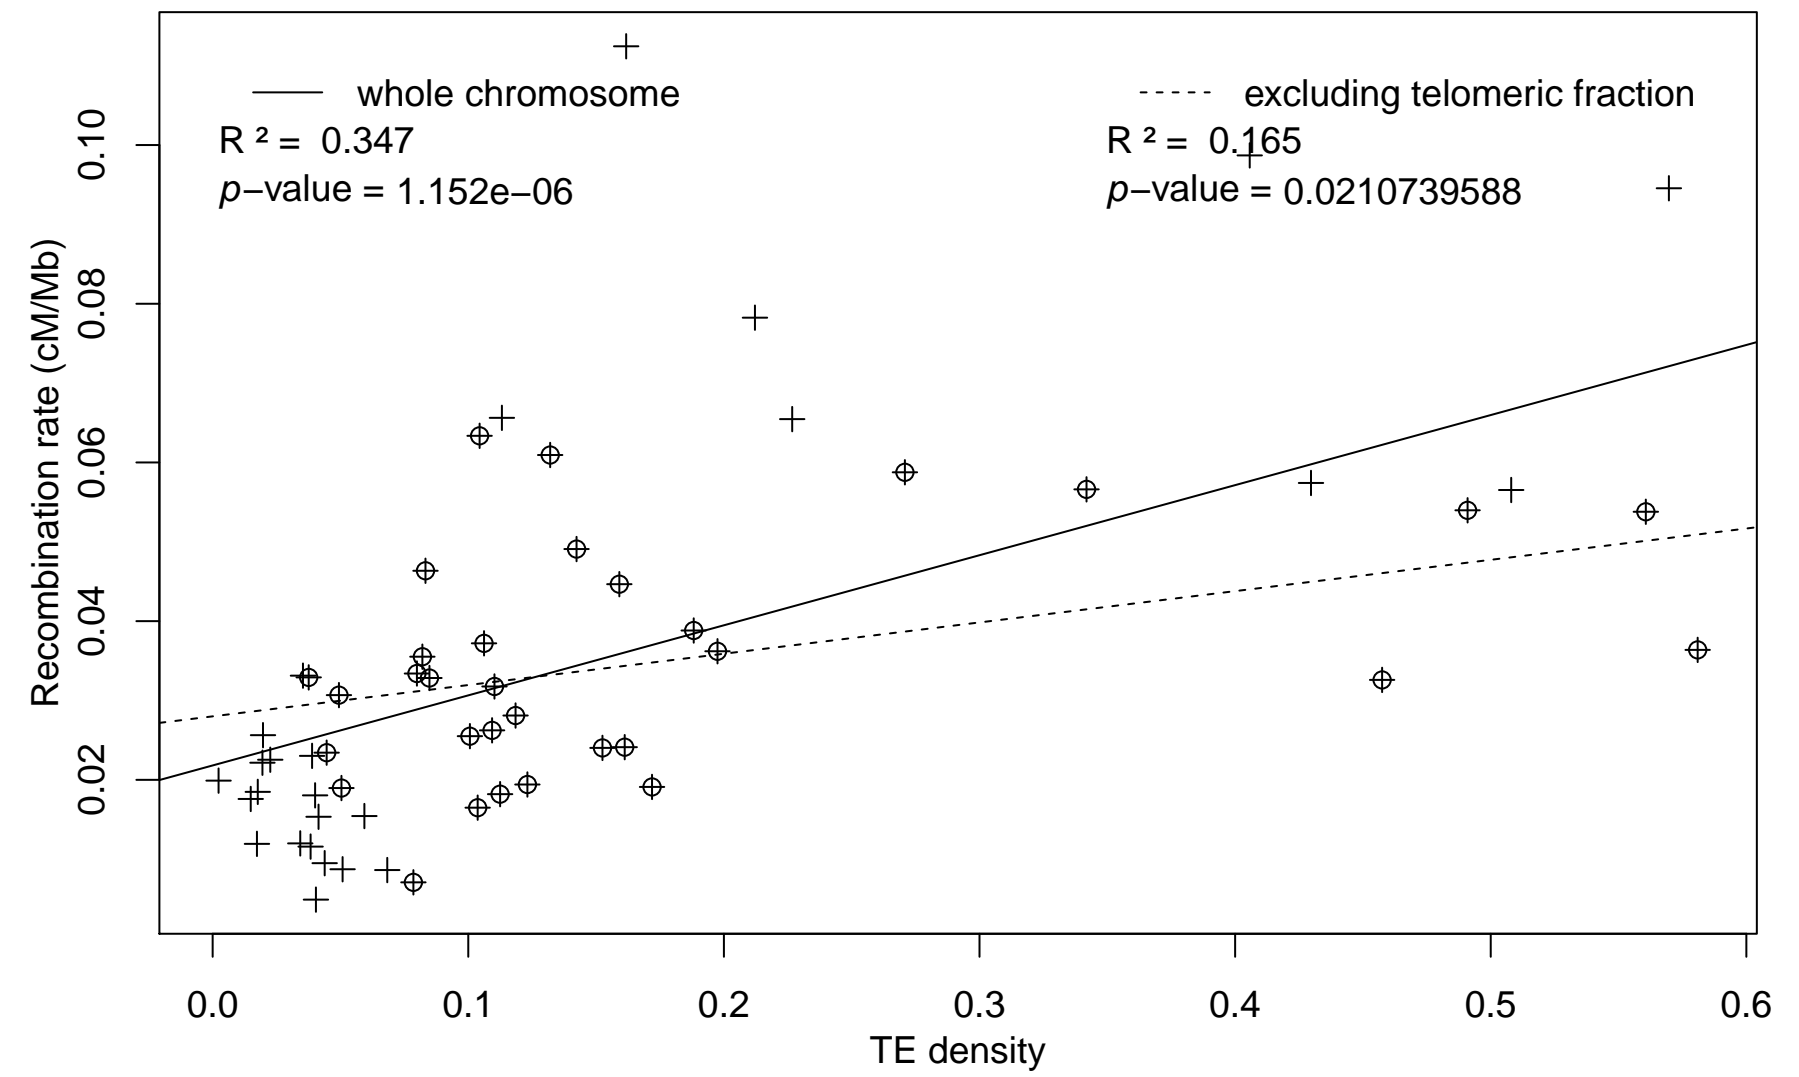**Male Chr 3 removing 50 % of total length VALUES TE density**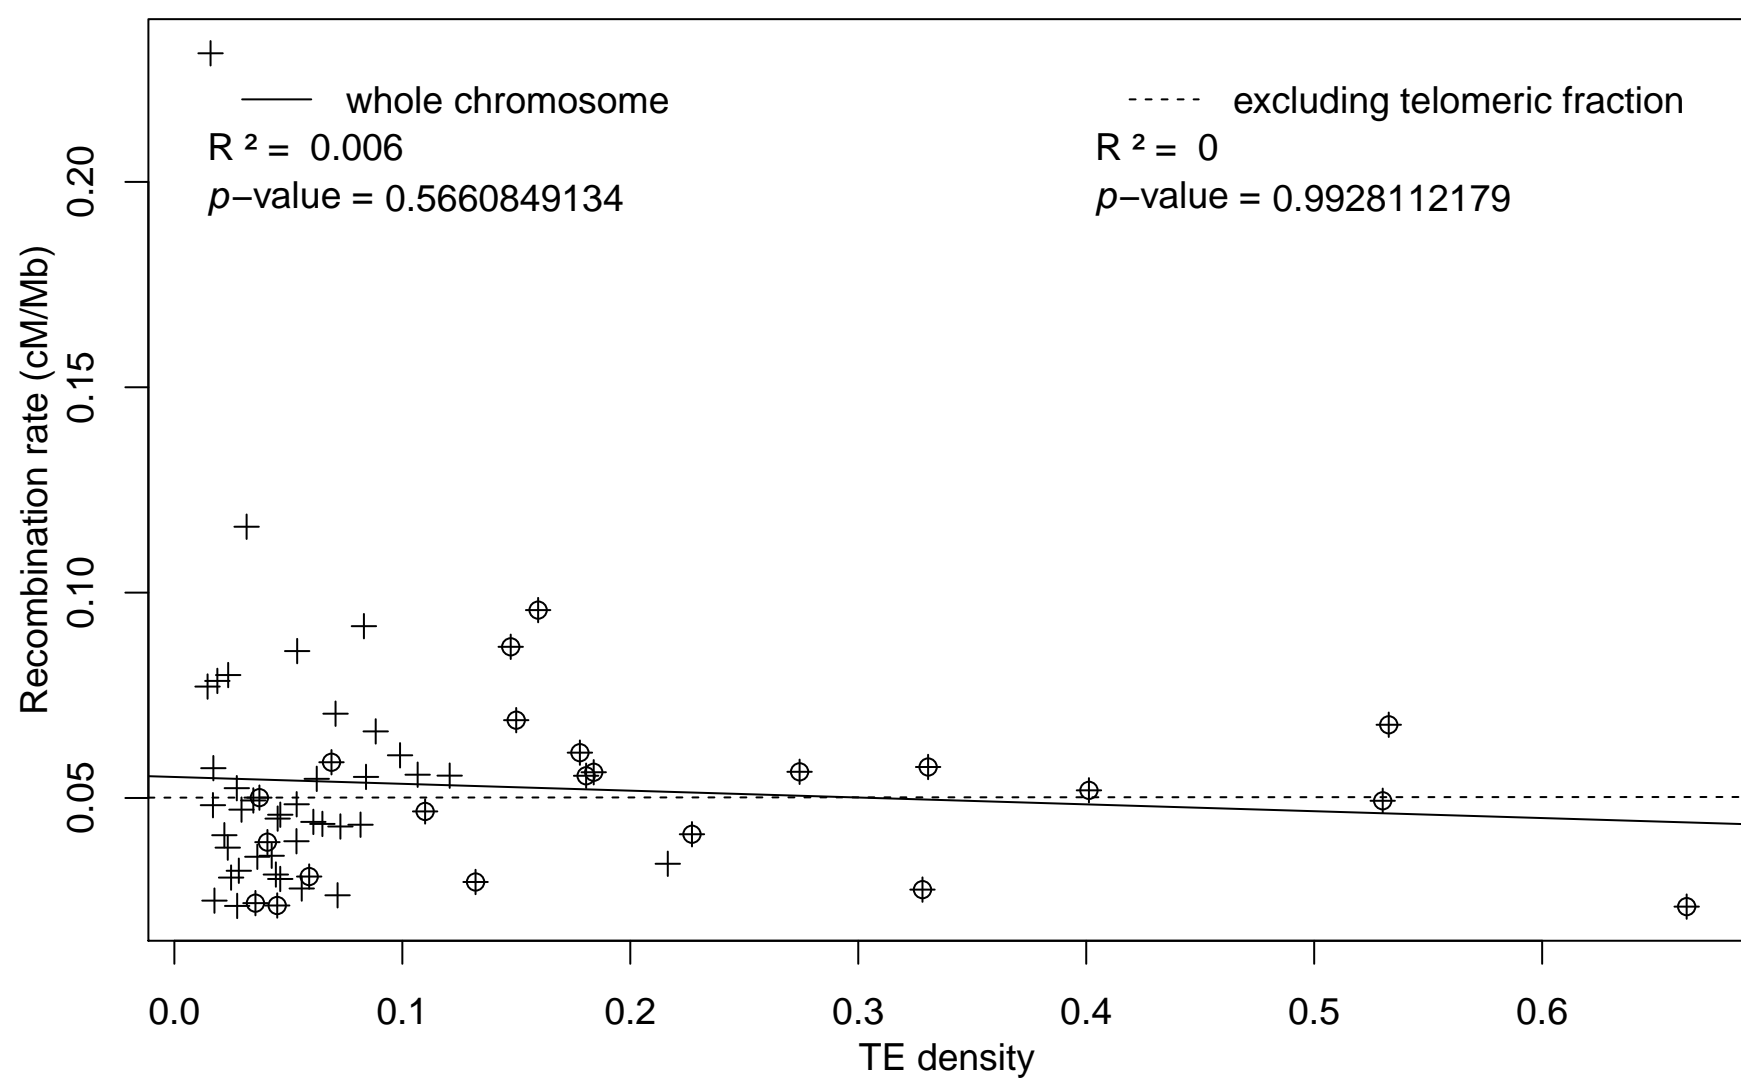**Female Chr 3 removing 50 % of total length VALUES TE density**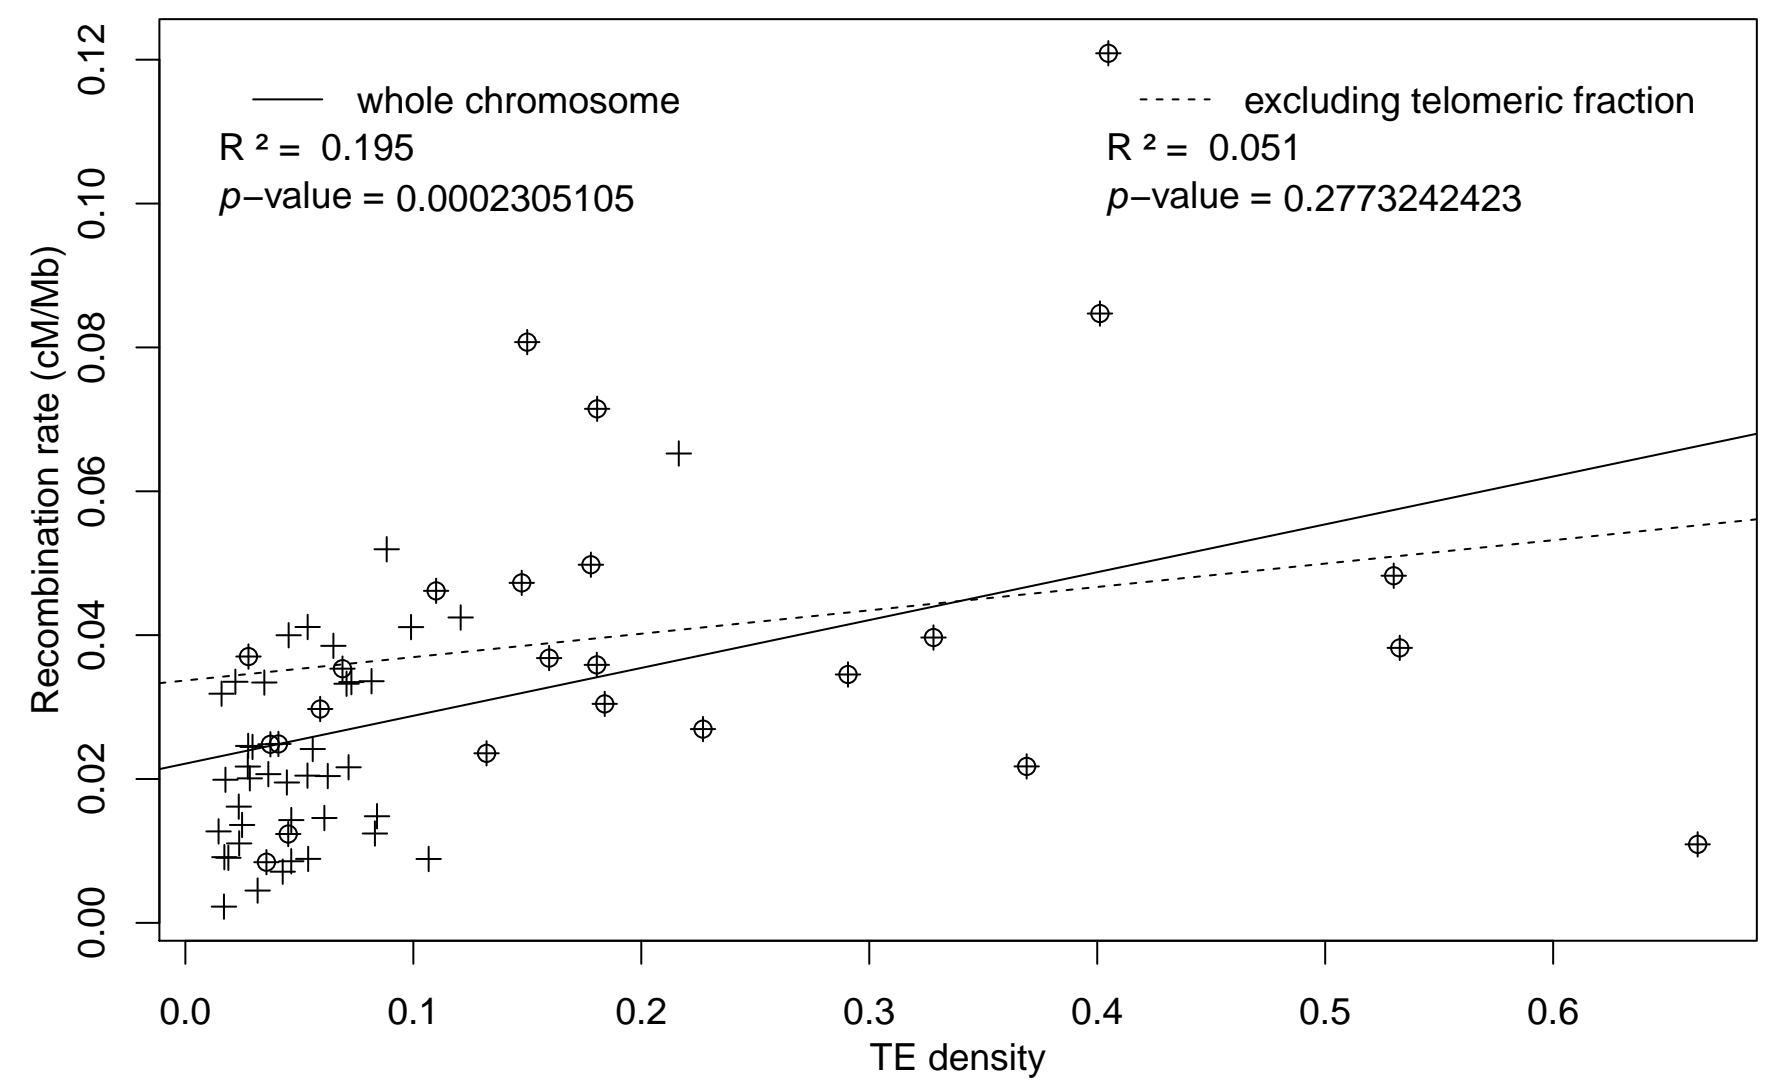**Male Chr 4 removing 50 % of total length VALUES TE density**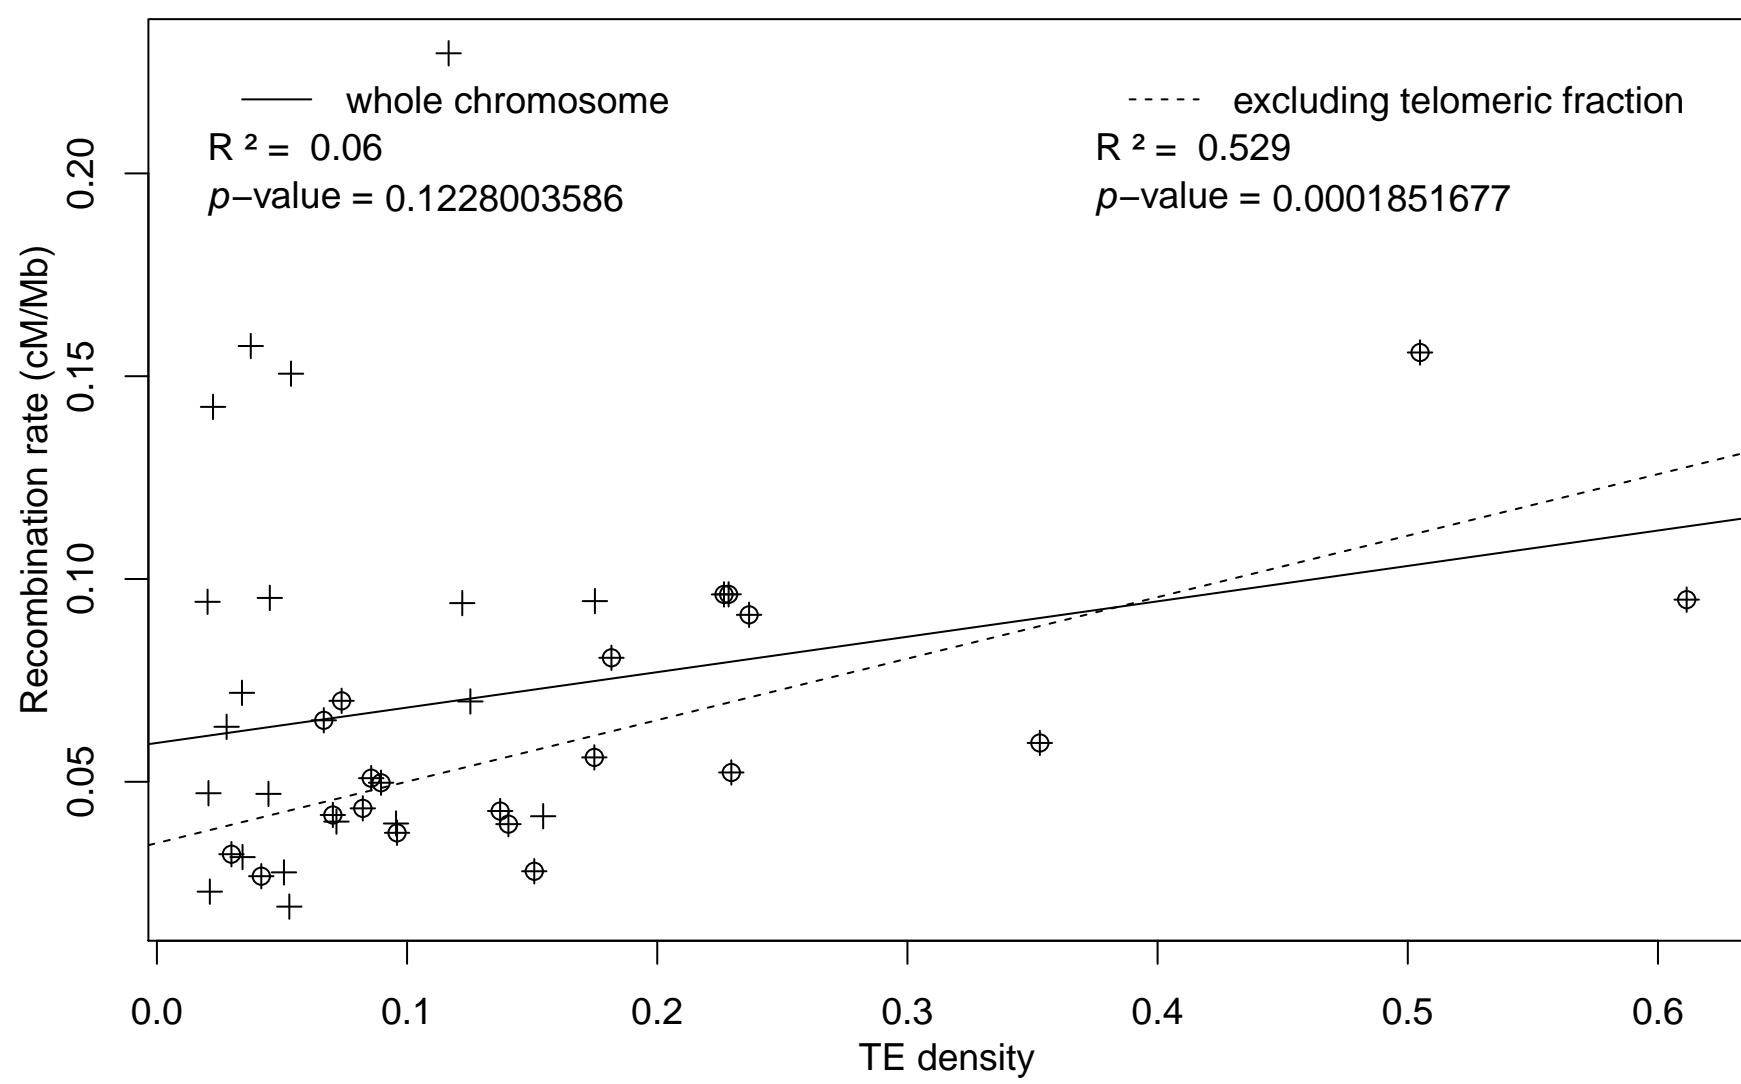**Female Chr 4 removing 50 % of total length VALUES TE density**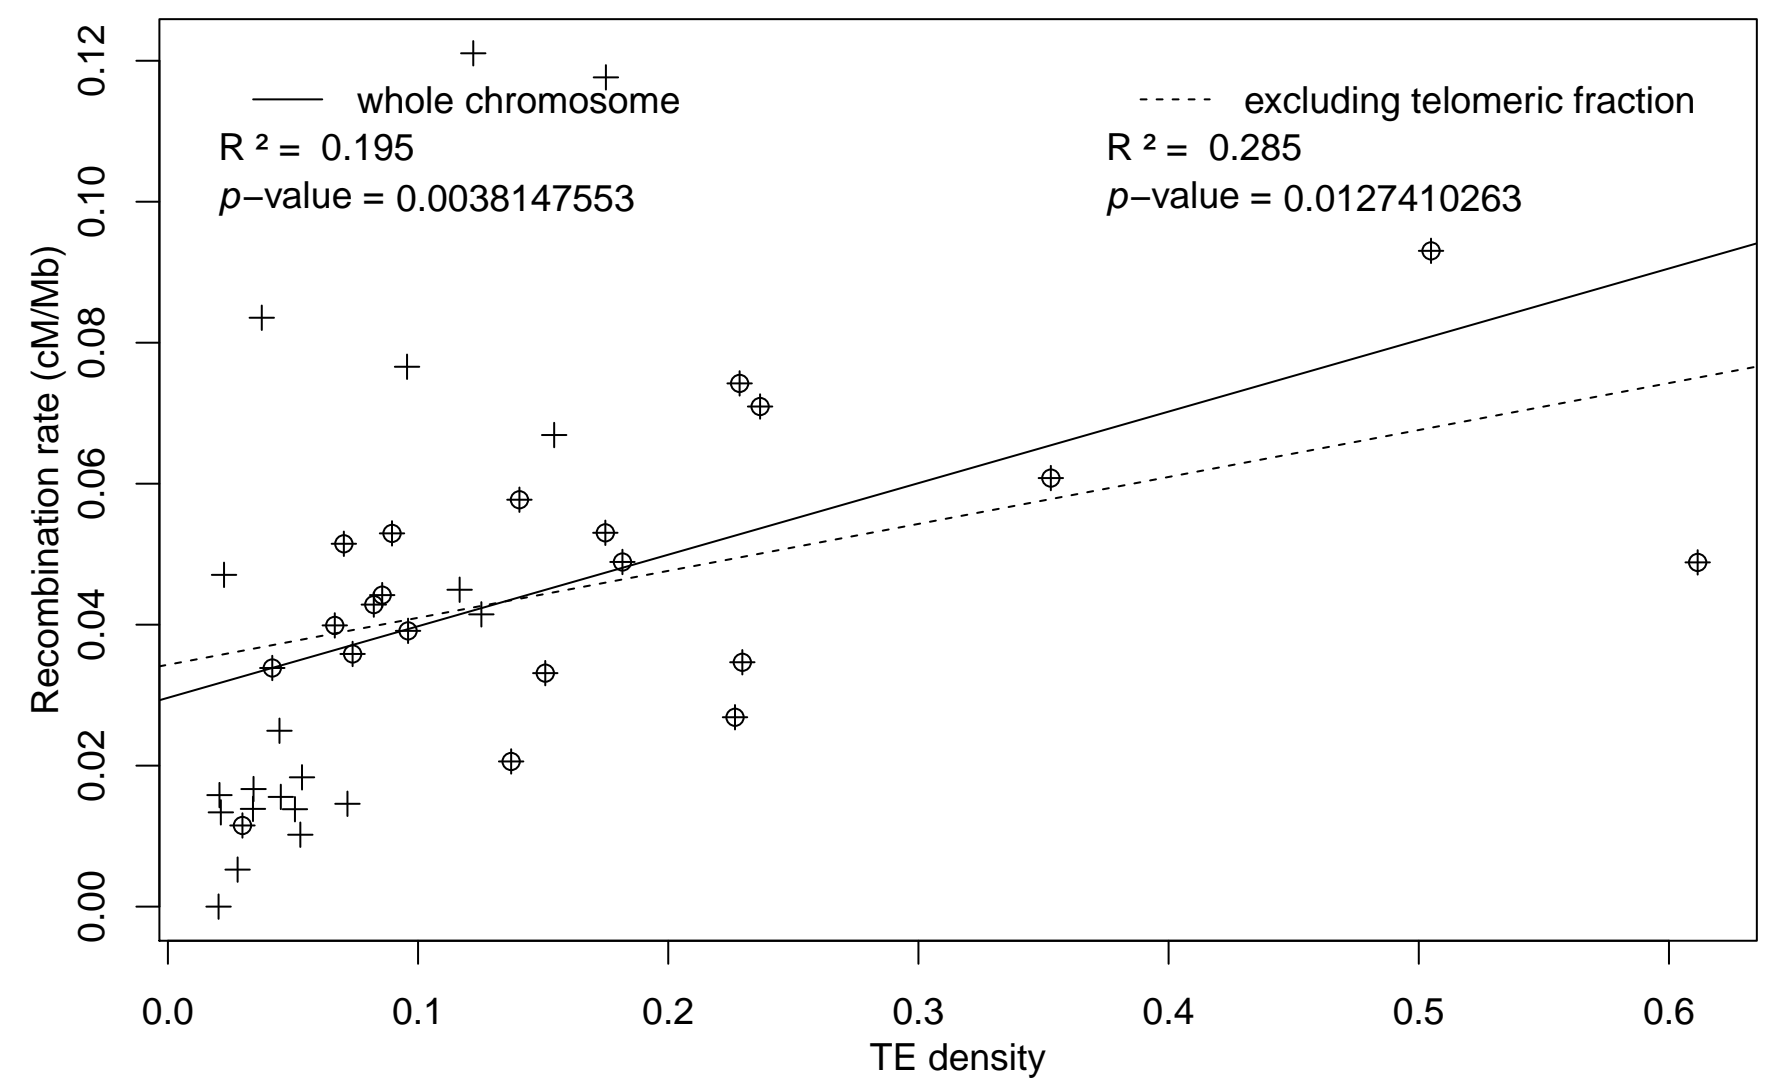**Male Chr 5 removing 50 % of total length VALUES TE density**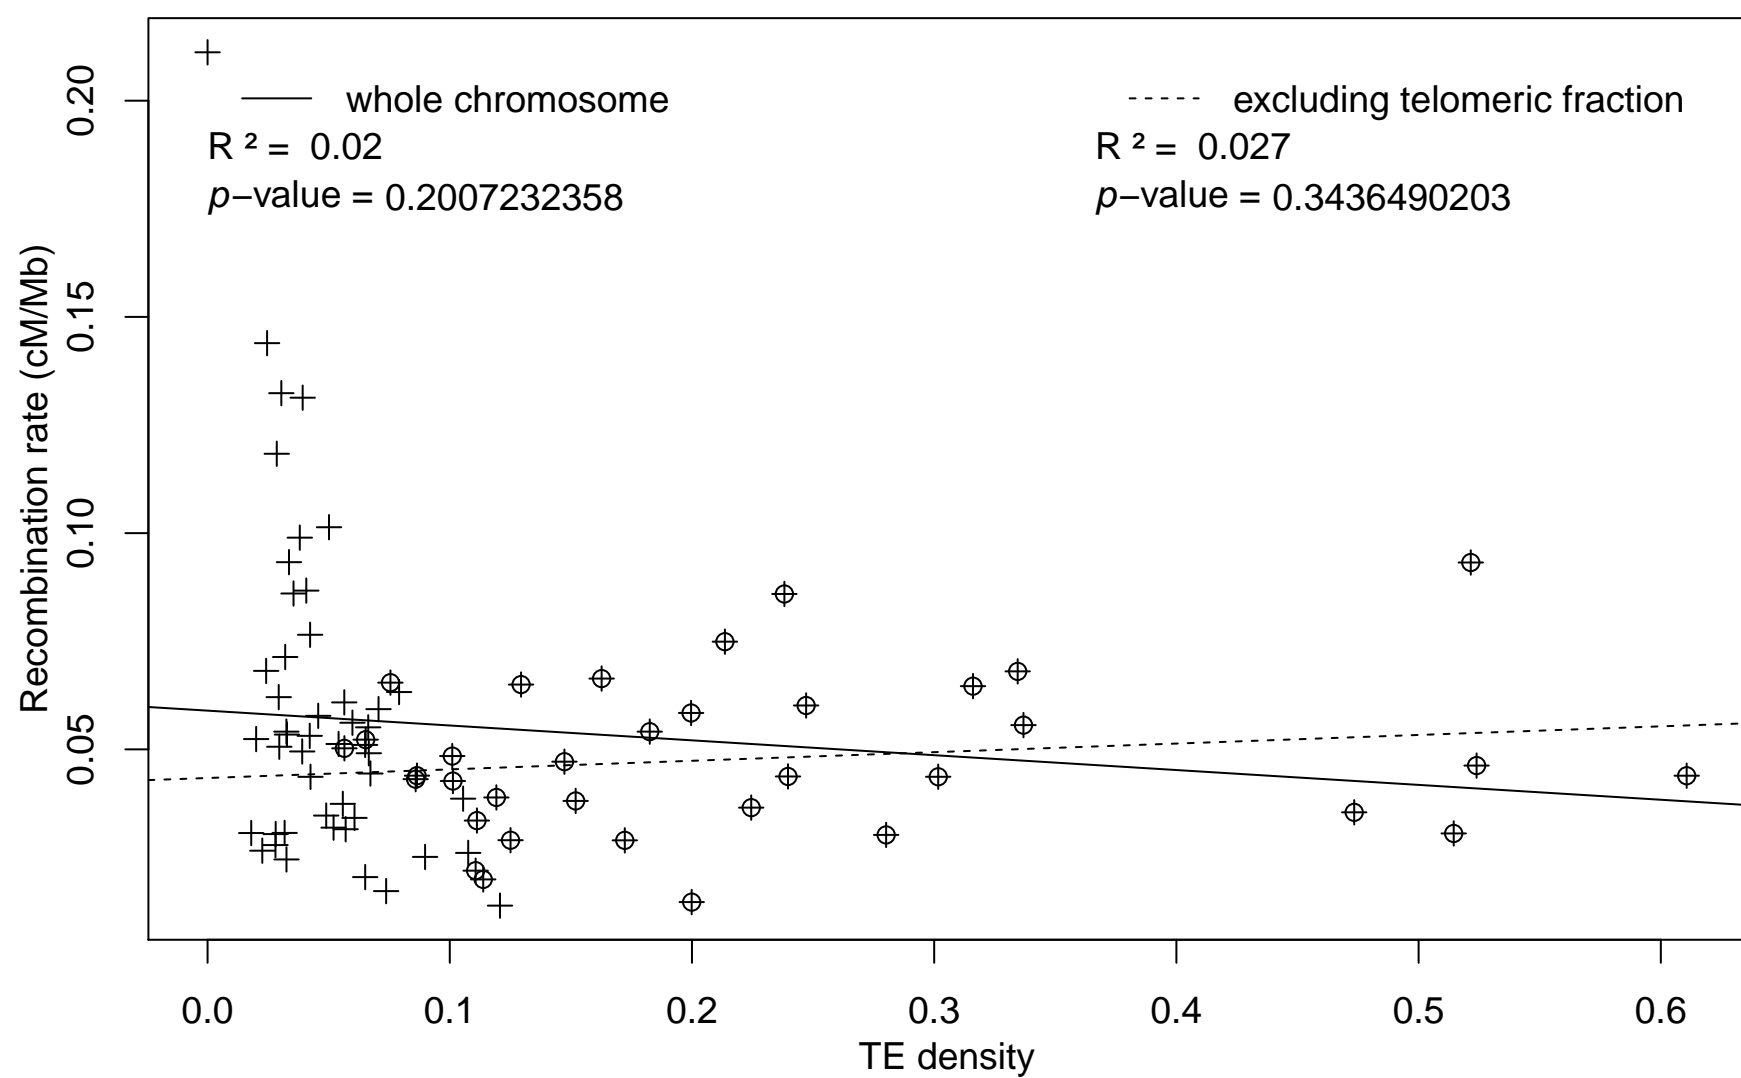**Female Chr 5 removing 50 % of total length VALUES TE density**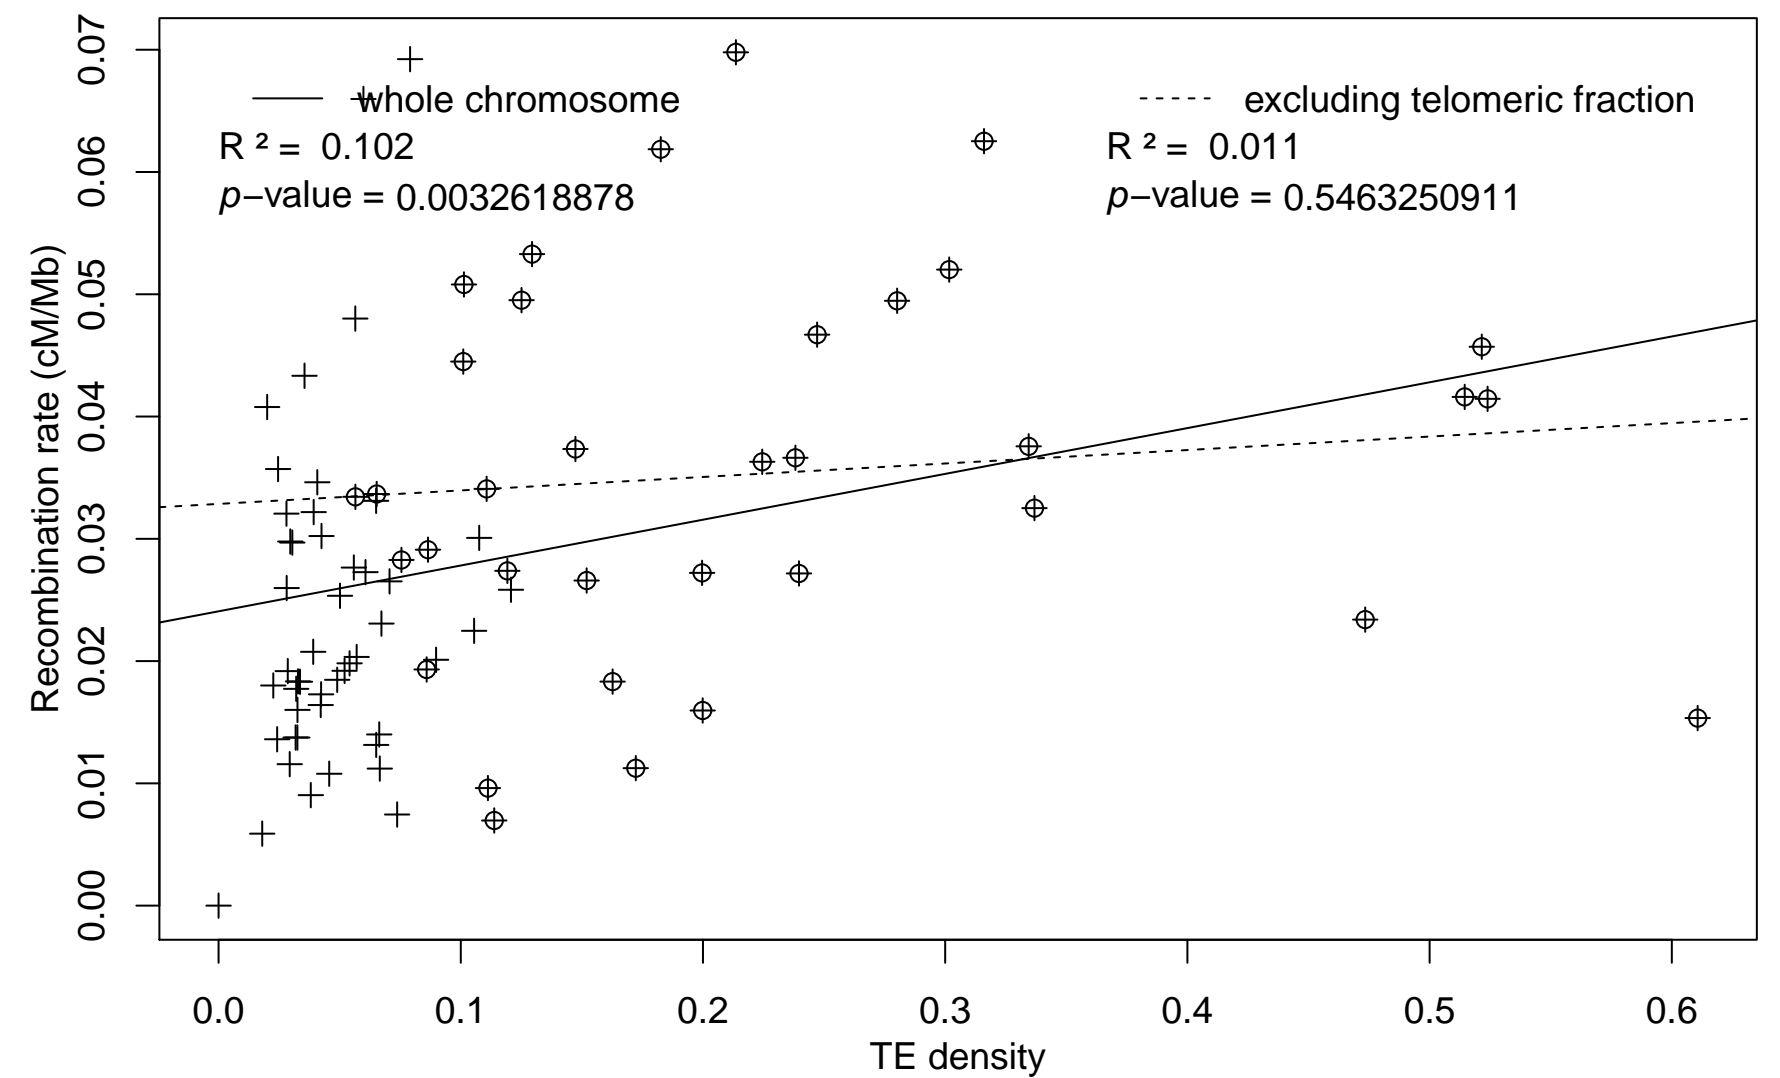

Supplement: pgen.1002354.s001.pdf [file pgen.1002354.s001.pdf]
