# Supplementary material for: Genome-Wide Crossover Distribution in Arabidopsis thaliana Meiosis Reveals Sex-Specific Patterns along Chromosomes
Source: PubMed Central journal article supplement (PMC3207851; doi:10.1371/journal.pgen.1002354), 2011-11-03
Supplement: pgen.1002354.s002.pdf [file pgen.1002354.s002.pdf]

| Chromosome | SNP #          | Sequence                                                                                                                                                                                                         | Col/Ler alleles |
|------------|----------------|------------------------------------------------------------------------------------------------------------------------------------------------------------------------------------------------------------------|-----------------|
| 1          | *CER445015     | TGGGGTCATTGCTTTCACACAATGTGCGAGGAACAAAACCATAGTTGTGAGGGTACACAACCTGATGAGTAGAGAATACGATCAACCTGAATGAGAGAAT[T/C]CAAACCTGTTGAGATTGATTTTGCATAAAGAAAACCATTCATATAAAAAATAAACCTTGTCTCATCTAACCTTGATGAGTCTGTCTTTTTGTCAAGC       | T/C             |
| 1          | CER469132      | ATCTCTATAGATAATGCCACAAGGTGCTGTGGTGTAGTGGTTATCACGTTTGCCTTACACGCAAAAGGTCTCCAGTTTCGATCCTGGGCAGCACCAATTG[G/T]TTTGCAATTTTTTAATAAGAAAAATGCAAACCTCCTTTTTCTTTTTATATACAGACCAAAAAATGGTATGATTTACTCAAGAATGATTGTTCTATC        | G/T             |
| 1          | PERL_4640_Ler  | CTTTAGGTCTAGCAATTAGAACCCTCAAATCCATAGTGCTAAGACAGTGTTTCATCAACTTGAACCTGAAAGGTTTGTGCGAACGGCTAACTGGATCTTG[T/G]GCAAGTAAAGTTATGTAGAAAGGGGACAAATGCATCATTAACTTGTGAATTTTCATTACATCAACGAGCTTGAAGTTCGTCGCCCTGAGAAAAAGAGAGCA   | T/G             |
| 1          | PERL_7259_Ler  | AGCATGACAGGAAAGACGCCGGTCTTGACATCGGTGCTCTGGAGAAGATAAAATCCGGCGACGTAGAAATTGTACCTGCAATCAAACAGTTCTCGCG[T/A]CACACCGTGGAGCTCGTAGATGGTCAGAAGCTAGATATCGACGCTGTGGTTCTCGCCACCGGTTATCGTAGCAACGTCCTTCTTGGCTTCAGGAAAG          | T/A             |
| 1          | PERL_8033_Ler  | ACCCTAATCCTGATTTTCAGGCGAGGAATCAGTTTACGCTGAATTATTACCGTAGAGGTTACTTAGATGATCAAGGGAGGTTCCATAAAGGATCTCCTCA[T/G]GCCGCCGGGATGAGTCCGACCAGAAAATATAAGTTTTTGTGCTGCCAAAGATGCCGCCGACGACGATGCCGGAGACTCCGAAACTGATGGATCTTTTTCCGG  | T/G             |
| 1          | PERL_9896_Ler  | GTTTTGAGAAGACGGCAAGGGACGCTCAACAAGACGACGCTCTCATTCTTGAGCATCCACCAAAAGCTTAACGTATTCTCTACGTGCACGCCACGAG[A/T]TCGCGCTTGAGCCTATCCCAAAGACGATGTGCTCGATTTTTGTGCGGCTCTGAGATTGATCTTGATCAGAAGATGAGAAGTATGCATGAATAGAGTTTTT       | A/T             |
| 1          | PERL_11886_Ler | AGCGCAAAGAGATAGGTTTGAAGAAAATAGTACCTTTATACCATCATCTAAATCCTTTAAGCTATCCAAGGACTGACAGCTAAGCTGTTGACTGGTCTGT[C/G]TGATACACTTGGACGAGATATGTGGTTTACATCTTACACAGTTCACTGTTAAGGATTTCTCAACTTTTTCTTCTCTCTCTGGTTCCTTACTGTA          | C/G             |
| 1          | PERL_13312_Ler | AGGTCTGAACCTAAATCCTTGAGCCTCCCTAACTCCTCAAGCGCAATACTAAATGACCCATTCCTGCAATGTTCCCTTACCAACACATTGAGAAATT[C/G]GCCAAACACTTCTTATCATCATCTAATCTGTTGCAGGAATCTTCCGGAACTTTTTCGTCAATCATCACGTACAATAAGGTCAACCAAAAGCGTTAT           | C/G             |
| 1          | PERL_15479_Ler | TGGAGGATCTTCTAATGTTTCTAAATGGCAGCTTCGATCTTGCTGTATTATCCAGTAGCACATCGTCCCTAACGTGTAATCATTATAGTTGCC[C/G]ATA GCAGTCAACCAAAATGGCTAGCCACTTCTCTTCCACCAACAACAACGACAAAGCCAAAAAGGCAACAGAGATGAGAACACAGGCAAGCCACA               | G/A             |
| 1          | CER428759      | TTTATCTGCATTGAGGTCAGGATCTCTAAGGTAATCAATCATACTAGTCTTGTGTTTCAATACAAAATTTGGTATTTTCGATGATCTCATTGCTTTTGTAT[C/T]ATGTCAGGGGATATTTGACATTGTGCCATTACCATCAAAGAAATGAGCTGAAAGAGCTGACCGCTCCGCTGTTGCTAAAACCTCGTGGGTGTTTTAGCTTGC | C/T             |
| 1          | CER446172      | AATTTGCCAAAATGTATGAAGTCAAAGGTATCTTCTCAATCCGAGTGTATTTACATCAATAATTTCTAAACACTGGTGGCATTCTCCGTAATAAGA[T/A]CAGGAAACCAAGGGCAAACCCACAACAGCTCAGTATATACATCACTAGGCTAAGTCCCTTACCTCCACAACAACAACCTTCAGCTTTAAGCAGCAAAAAC        | T/A             |
| 1          | CER445501      | CTTGTTTGTCTGATCTTCTTCTTAAATTTTTTGCATGTTTTCTTACATGATCTGCACTACTGCTGAAGAGAAAAGTAAGTTTGTCAATAAACGCC[T/C]ATGATAATGGATGCTTACTTTTCAATAATTGCTTCAGTTTTATTTCTAATCCCTGATCTACCATTATGGTTGGGAGAACCCTAACTGTTTAGCGCTGTGA         | T/C             |
| 1          | PERL_24716_Ler | AGGTAATAGAGACAATTAGGGTCCAGTTAGCTTACTATCATCCTCAATCATTACTGAGAGGGAGAAGCGAAATGGAAATAATTCACAATTAAGTACCT[G/T]GAGCAACGATGACACAGATCCATACATCACTTTTCCATAACATCTCCACAAGAATATCCTCTGTTACGAGATAATGCAAGATACGAGAGACTTCAATT        | G/T             |
| 1          | CER465299      | TAGTTAGTGTTTTGGCTTTCAATACTTGAACATGCATATAGCCAAAGTTTTATAGTTTAAAGATTCAATAATTGCAGTTTGGATTACGAAATTTGTCTAA[C/T]TAGAGGAATGATTGCTCGAAGACTTATAATGCTTATGGTGTGCTTTCATCCATCCATTTAGAGAAAGAGTACTCTACCAATAATCGTTGCTTTACTATGTGTG | C/T             |
| 1          | CER474495      | CATTCCCTAAAAAACGAAATGACTCCTTTTGAATTTGCCGTAAGACAAAATCCAATGAATGATAATAATGATTACAGCACGTCACCTTAGTAAGAAAC[A/C]TTTGAATGATGAATGCTACGTATACTTATGATATCATCAATCAACTAATTCAGTACTAAGCTAATCCTTTTATTATGTAGTAGTTAGACTAAA             | A/C             |
| 1          | CER475313      | CAGGGAAGAATGTGCTGGATAGCGAGTTCAGGGTTTTAAATGCGACAAAACCTGGTAACTTTTCCAGCAGCTGCTATCCGAACTTCTGCCTCATTATCAC[A/G]AAGTAGACGACATATGCAGGCACCAGATCCGTCCTTAATACATAAGGCACATGAGAAAGTATAAAAAACGACTCAAAGAAATTTATAAGATGACTCAA      | A/G             |
| 1          | CER468122      | TGCAGAGTTTTTTTTTACAAGTATTGATTCTAAGAAAGATTGTGTATGTAGATTAAGAGTTTCTGATTCTGTAGCATTAAAGATTTTCAATAACACT[T/C]GATTGAGAGATGAGCATTCTACTTTTTAGGTAAGAAAAACGAGACACATAATTTGTAATCTGTGTAATAAATTTGTTTTTGTCCAAAAAGATTTCAT          | T/C             |
| 1          | CER465478      | GTGCGAAATTAGGAGAGTTAGGGCGGACGATAATCCTTTTGTGTTGGCCGAGAAAAAATTTGGTTCAGAGTTAGGTAACCTTTAAGCCCATTTGGGCTACT[G/T]GTGATAATCTATGCTCATCGTTTACCTCACCATTGTTAGAACAAAACAAAAAATAGACATCACTTACCATTATTTCTAAATTAATGTTAAGTATGA       | G/T             |
| 1          | CER465333      | AACTCCTCCGTAAGTCAGCCATCGATTTGGAGAAGAACAACGAATGCGGTGTAGACGCAAAAGAGATTGCGAGAGCTTCTAATGGGTTTCAGGAGTAGTCT[A/T]AACGATAAGATACATTGGGTGACATTCCATTGCGGATACGATTTTGGGTACTTGTGAACTCTTGTGAGGAAAGAAATTGCCGGAGGAGATACGGACT      | A/T             |
| 1          | PERL_41814_Ler | GTGATTTGCTCAATCCATCAAGGTCAACTTTAGTTTTGCCAAATAACTCACCCAAACAAGCAGTGTGATTTTTACACTTCTCGTCTCAGAGTGAGA[C/T]TCGGAATTTGAAGTTGTCTCGGTCTTGGTCTCCATCAATTGAGGTTGAACACCTAAACCCAAATAAACAAAAACCATATGTCAACGAATGACCACAACATA       | C/T             |
| 1          | CER475177      | GTTGACGACAAGTTTCATTGCTGCCATTACCAACTTCAACCAATAGAAATTTGACTGGATCATATAATGCAAACTAGTACGAAAATGGTTCAATTTG[C/T]JAGAA GAAAAAGAACTAAAAGCAAAAACAGGCAAAAAGAGATACCTTTCCCATGATGCTAAGAAGGAGCAGCTTTTTCGTATAGCGGCTTGTCCACTA        | C/T             |
| 1          | PERL_46706_Ler | GGCCTGTGGATTGAGTTTACAAGGCAGTAGATCTTATCGTAAAGGACTGTTTATACCGCTGAGGCTCTCATCTACAATAACTCACAGTGGGTATCG[C/G]TTATTGAAAACCTTTTCCCTTTAGGAACCGGCTACTCTGCTTGTGACTCAATGAATGCAGTAACAGAAGGCATTGATGCCATCGCAACCACAAGAG            | C/G             |
| 1          | PERL_48654_Ler | GAAATTTGAAAATTTATGTGGCTAGTACTTAGTACGATTCACAGTTGCAGAAGAAATAGGGGGGAAGATAGAAAACGTGAAATGAATGTTTTGAGAATA[A/G]TTT AACGAGCTGTTCAAAGAAATGAAATATAATTATACATGACTTGGTCAATAATCTTATGGTTGAGATGTTATGTTTAGCTTCAAGCTTTATAGTA       | A/G             |
| 1          | PERL_50660_Ler | AACTGTGGTCTTATAGTTTTAGAGGGTAATACGAAAATGAGAGTGGGTTAGTAATGGATAACTGAATTTAAGAAAAGTTCAAAGTGTGTAAGTGAAG[G/A]JAGTCGTAAGAGACAAGCATCTTCTTCTTATAACCATCTAAACCACATGCTTATGTCCACTTTTTTCTTCTTCTGAGTGAAAAACACTTTAGTCTCCC         | G/A             |

|   |                 |                                                                                                                                                                                                                |     |
|---|-----------------|----------------------------------------------------------------------------------------------------------------------------------------------------------------------------------------------------------------|-----|
| 1 | CH1SNP24        | GCAACGGAATACGAAAATACCAGAAGTTATAAACGCGCGAAATCGAATTGACTTACCAGAGATCAGTCTCTCGCCGGAGATGACAGTTTCTATGCGACA[A/C]TTGGATCGGCGAATACGATTCCGGCGACTTCGGAGAAAGACTCAAATCGTTGTGACGATCGCTAGCGTGAGACTTGGGCCCTTTGATTAATAATGTACT    | A/C |
| 1 | CER432978       | ATGGTTTGACAGCCTAATTCACCTGCAACCATATAACAAACCATATAACACCTGCAGTAACAAGCTCTACAACAACGACCCCAAGAGTCAGC[G/C]CCGTGTCACAATCCCCAAGAATCATCTGCTACTTTCGGTTCTCGTGATCAAATGTTCCATCCAATCAATTTGGTGCCCAAGGATCCCAAGGAAGTGGCTG          | G/C |
| 1 | PERL_58052_Ler  | ATAAACCCCTTCTCGATGAAGAGATAAAAGTGTAGATAAGCCATGAAGCCACAAGCACTAGTGGTCCAAAATGAATCTCCGGAACACCAAGCTCTTCCGC[T/A]ACGTCAAGAGTAAAGCTCATCGAACCATCTGATACAATACAGCTCACCCGAGGGACATCCTCTCTCGTACAATCCGCTGGAGAAGCTTCTTGAACGGAA   | T/A |
| 1 | PERL_61102_Ler  | AATGGTGTACCCGGGAATCTAATTCCTCAATGGTACTTTATCCAATGGAGGAGCAACGTCTTCCGTTCTCTTGGAGGCAAGCTGAAGGTGTCATCTAC[A/G]GATCCTCGCCGCGAAGAAAGCTCCGATACGGCGGATGTGTCGGACGGGGGAAGACTAAATGGCATCTAACGGGTACGGCGACGAAGGGTATGATTTT       | A/G |
| 1 | CER444670       | TGCATAGCTTACGTAAGTTGTCTTATGCCTTCTTAAAGAGCTCCGGCTTTGTAGCCATTTCTGTTGTCTCTCCTCTCACACTTTATATTTACACCTTT[G/A]CTTTCCCATTTTGCACACTCTGTGTTACCAGCTCCTGAAACTCAATCCTCCTCACATTAATATCTTACAATACATTATATGTGTTCAAATAAATCAAC      | G/A |
| 1 | PERL_68371_Ler  | CTCCATGGATGCTGATAACATCTCAAGATCCAGCAACTCTTACCTCGGAAAGCTCAGGTTCTTTTCAGTCCCTAGACATAGTAGTTTGCTACTGTTGAAT[A/T]TTATGGTCTGTTTATCTATTGTTCAAATAATCTTTGTGATTTCCCATTAATCAAGCTTAATGAGGTTCTTTATCTCTCTCAGATCAAACCTTCTTGG     | A/T |
| 1 | PERL_70718_Ler  | AACCAAACCCAACACGTAATCAGTGAAGGAAGGGACTTACAGTGGATTTCCCGCGCGAGATGCCAGTGATAACAGACACCAACTGAACAGT[A/G]TCCGTTGATGAGTGAACCTTCCGACAGAAACATCCGGATGGATTTGAACGCCATCCGGTGGTCTTTCATCATCTTCCATTTTCACTCCCTCAGCTT               | A/G |
| 1 | CER426758       | TCACTTGAACCTGCTTGTTCGTTTCTTGTACTTCTTCCAGCTGAGGCTAGCGAAGGGTTAGCCCAACTTCAAACCATGCTGCAACAAGCGTATCACCG[G/A]ATTCTACTATTGATGATGCGGTTTCATACATCAACACTGTCAAGGAAGCATTTTCATGATGAACCTGCAAAGTATTACGAGTTTTTCCAGCTCTTTTATGA   | G/A |
| 1 | CER480379       | GCACCTTGCCTTTTCTACAGTTGGCGTGTGTCAGCTGTGTAACAGCTTTTCTCCTTCTCATTGCCGCTTCACTTACCGAGGTAACCTAAAATCAA[G/T]TCTCTCAAACCAAATTTGAATCTTGAACCTGAATAAGCTTGAATGTTATATTTACAGCAATTTTCTAAAAGCTTTGGAGGAGATTACACAAGG              | G/T |
| 1 | PERL_77651_Ler  | CGACCCGGGAGGAAGGAATGGTCAATCCTTGTATCCTCCAGGCTACTATGTTTTCAGTGTGGTGGTGGGTTCTAGGTGCATCGATTTCATCATGCGATCTG[C/T]GATGGGTTAGGTGCGAGTCTGTTCTTCAACGCTATGGCGGAATTAGCTCGCGGAGCGACAAGATTTCCGATCGAACCGGTTTGGGACAGAGAACGTTTAC | C/T |
| 1 | CER479670       | AGACTGATGTTGTCTGATGTATACTACATCTTCCACCAATGGTCAACCGAAGTTACAATATGAGTGCCGTAATTTTCAAATAAAGCTGTACCAAAAGAG[G/A]AAC AAGTGGAGAAACACATAAGAATCATGATAGATGTCATCAAGAACACATAAAAGTGTAGCAAAGGACAAACAAAGGAAACTGACTCTCAATTAGA     | G/A |
| 1 | PERL_82572_Ler  | TGCATGAAGCCCAAATGAAAGGTTTTGAAAGAACTGCACTGTGATGACGATGAGACAGTCTTATCCAGAGTTGAAATCAGCCAAATAGACACTTGAC[A/G]CC TCAGCAAGAGGTAACCTAAACAGAATCCATTTCTGTGATCGCCAAAGCCACACGATGATTCTTGCCTAAATCATTTTAAAGACTGTATAGAGGAAAAC    | A/G |
| 1 | CER426610       | TGGTATTGGAGGTCAAGAGCCAATTGAGACTTTGAGGACTTTGAGGTCAGACAAAGTTTTACAGCCAAAGAGTAAACCACACGGAAAGGTAAGAAAGAC[C/T]GTGGTCCGGTTTATCGTCATAACAAATGAATACGAGGGTTTTGAATGGTAGATTTAAATATGATGCAGATATACTTTGGCGAGAATGGTTTGGAAAAGA    | C/T |
| 1 | PERL_89383_Ler  | GTTATTAATATTTACTTTATCAGTATAGGTTTTAGGGGTGTTGAGTGTATATATGATGTGTAACCGTTAATTTGGTACTGGTGCAGGAGAGATAAAT[T/C]ATGCTGATCCACTAGGTTTTACTCGGCCCATTTGCCCATTCATGTTCCGGTTTTCCGCTCGCGGCCAACTATCCGCGAGTTACCACCATATCGTCC         | T/C |
| 1 | PERL_94924_Ler  | CCTTGACGCAATAAAGAAAATATTTTCAATGTCGATAGCTATCTCCATTCCAATGGCCCCCTAGTCTATTTCATCGATTACAATCTTATCAATCATG[T/G]TCCG TCAATACACACTTTTCTAATTTCAACAATTTTATAATTGTTGCCCTCGTTACATTTAATTGTAATATTTTTGTTCTCCTCATGATAATATTATTCC    | T/G |
| 1 | PERL_98015_Ler  | AAGACAGGGACGTACTTGTATTTGATCATGAGAACCAAGTAAGGTGCGATTTGAAATTCGCATACAGATTCTTTCTTTCATGTCAAATTCAGCATTCTGAG[T/C]CAG TTTGACCAAGGTTGGAATCAAATTTGCATCGATTACTGACTGTATCACCAGGGGAAAACAGTTAGTTTAGTGAGATAGCAAATAGACAAATTTGTT | T/C |
| 1 | PERL_101417_Ler | AACAAATGAAATAAACGCATAAAAGAGGGTCGCAAAAACCGTGAAAAGAGACCAAAAATAAGTATGGATATCTGAACAGAACTTGGATGTCCTGAGACGCA[A/T]AG TTAGGTCGTGGCCTGGCCTATAGGCGAATCGTCTTGAAGGAATGTCTCATACGCAGTCTGGAGGCGGTTTCTATGGTCTTTCCCTTAGTGTTTTTAG | A/T |
| 1 | CH1SNP41        | GTCAGTTTTGATAGAAACGCACGAATCTTTTCAGAGTAGACTTCTCTCTAAAGGGCCACCATACTGTATGTCCACATTTGGAATGTTTGTGAGGAGGTC[A/G]CCA AATCGCTTGTACTAATACTACCAAGAAACTGGTTGAGCCTTTGGTCCAAGTTTAGACTTCTCACACATATGTGAGTTTTGTTTTAGAGTGGATTTA   | A/G |
| 1 | PERL_108653_Ler | TGGTTGTTTTGAGATATGGCAATGTGCATTTGAAAGAACAACTGGGATGTCCACTATTTGTTCCATCAATTTCTCAATGAGAAGCAAGAGGCACACCG[G/A]GTG TTAGATAAGCTGTCCCTTAGAAGACACAAACATCAAGGTGGGAAGAGAAGTATTTCCCTAAGGCGATTTCCAACCTATTTTATTTTATAGATAAAA    | G/A |
| 1 | PERL_111792_Ler | ATTGGATTTATAATAATAAATTTTTTTCTTGGATTTTATAACACTAATAATTTAGCTAACGAGATAATATAGACAAATTTATATGGGATGACGGGTG[G/A]TCATAT GCGTTGGGGTATTTTACGGATGTAACATTTGATTAAGATGGTAGTTAACTCATTGATGTCTTCTGATGATGAACTACTGTTGAGGGCTAG        | G/A |
| 1 | CER480992       | CGGCATCTCCAGTGACAATCGCGGTCCGGAAATCTAGCCACGCCCTTCACTGCCTCTCTCATCTGAGAATCAAAAGTTGTCAGAAAACCAAAAAAA[A/C]CT AAAACAAGGGAATGAAGAAGTAAGAAGGGAAGCAAACCTCTCAGACATGTAAGCTCGATCAGGGTTTTCAACAATGGGGATAATGTACCCATCATAG      | A/C |
| 1 | PERL_119867_Ler | CAGTGTTTTTCACTGTTATAAAAATCAAATAACAGTAAAAGAAAGATTATATATACATGTATAAATAAAGTAAATTTCTTAAAGGAAATTAGTACCAACAC[T/C]GGCGG TTCCCATCTCCTACCGGCGGTCTCTCCATTGTCGATAGGTTCTATGTTTTCTCTTTCCATTTCTTTATTCTGTTATTGTTGTTGTTAGGTTTT  | T/C |
| 1 | CER480893       | ATATTGTCAAAAAGAATTTATAATAAAAGTCCAATATGATTGGAAATAAGAGCTACACAATACTAAGTCCATCTTTTGGAGAGCAACACATGGTTTCAA[G/T]CAGT CGCTTGCCAAATGTAATAAACAATCAATTTGCCATTTGAGCGATCAAAGGGTATTGACTCGAAATAGACAAATAGCCTATTGTCTCTACGACCAA   | G/T |
| 1 | PERL_125322_Ler | GATAGTCCCAGTTAGAGTCTGCGCAATCTGTTGGCAAGCTCCAACATGCTAGTCTCAGAGACTATCCACTCCGAGATGTTTCCAGTCT[A/T]GC AAAGGTTCTCCTCGAGGCTCTGAATCTACTCTGTCTCGAGCCTCTGGATCAACTCTAGTTACAGGCTCTACATGATCTATTTAACCTCAGACTCTAC              | A/T |
| 1 | PERL_125426_Ler | GAGTTTCCGCCAGAAGAGACGAGATAAATAGAGAACGGCGAAGAAATTAGGGTCCGTCGACTGAACGAGAGAAGAGAGCGATGTTGTTTTATATGCGC[A/G]G AAGAACGGTCAAATATCGTGTGAATAATAAGAAACCAAGTTTTATAGAAATTTTGGTTTCAGATGACGTGGATTAGGGTAAATGACGTGGATTGGT      | A/G |

|   |                 |                                                                                                                                                                                                                      |     |
|---|-----------------|----------------------------------------------------------------------------------------------------------------------------------------------------------------------------------------------------------------------|-----|
| 1 | PERL_126101_Ler | CAACAAGTCTAAGTACCTACCATTTCATCATTAGTAACCTTAAGTCATTTCCATAATATCTCTAGACAAGTAGAAGTATATACAATCTATACACCGCTCTAC[G/A]ATGTA<br>TGGTCCGCCATTGAATTCATCTAGAAAATGATGTGATTCCCAACACATTGGGCTGTCCGGTGAACACCACCGTCTCACTATACGTTCCAAACCGGT | G/A |
| 1 | PERL_126577_Ler | GGGCTAAGACCAGCTTGAACAACAGTAAGAGAAGAAGTACTGTTATGGTGCCTTCCAGCTGATTTGGAAATCCATTTCTGTTTAGGCCCGCTG[A/C]TA<br>ACATCCCGGATAACAGCTCCTTGGATCCATCTGATGACTTGTATAGGACCAGGAGGCAAGCTGTTTGTCTTTTTTGAACGGGACCTCTCTTTTTG              | A/C |
| 1 | PERL_127515_Ler | GAAATGAAATGTGAGTGGAGTAGAGAAAAAGAAAAACCTGCTGACGAACACCGAGTGGGTAATGTGCGCCGATGTTACATTCCAGTCAAAGAATCGGTA[T/G]G<br>GACTCTCCGCGGTTACCGCGGGCAAGAATGATAGGCAGAACAAATAGGATGGTGCCTCCGGATCTGCCACCGCCATCATTTTTAATGAACGACGGCGTT     | T/G |
| 1 | CER480480       | CATACCAGGTGCCAAATGAACCTAAATACATAGGGTTTTAGAGCAACAAACAATTGGATTAATGGAGAATTAATGTAAGATATTAATGCACTCACACT[T/A]ATGA<br>ATCCATGTGCGATTGTCAAGTAATCAGACTTCCCTACTGATCTAAGTATTTGACGGAAGAAGCACATGTGAAAATTAACCTCTAGTTCATTAGAT       | T/A |
| 1 | PERL_133623_Ler | GAAAAAGAAAAATATGGATTAGCAAAAAGACAAAAGTGTAGAAGAACAATGCATAGAGTTACTATGATGTAAGGCAACATACCTCTGTATCACCATAGC[A/C]AGG<br>CTGCAAGAGAAGAAAAATCAGAACATTAAGACGGTATAAAAAGGGCACAAAAGTGTATGTAGTTAATTCGTAACACAGGTCATACATGCGATGAACGGC   | A/C |
| 1 | CER467835       | ACCTAGCCTAGACCAACAAGACAACCTTCCACCAGACTAGAACCCTAGCCCACCACCTCTGGTAAACTGATAAATAACTAAGTTTTGTTGACCA[A/C]TCC<br>GGACAATCCGATTTGACCCGATCCAAACCAAAAACGAAAATAATTGATTTAGAAAACCTCGATCGAAAACCTATTTTTATAACAAGTCAATAATATGTT        | A/C |
| 1 | PERL_140292_Ler | CTTTGATGCAAAACCAGCTTGTAGACCCTGCATAACCGCTGTCTCCATGAGCCGTATTGATGATCATTGGTTTCGAATTTGCTTTGTCTAGCCATCT[A/G]ACT<br>AGCCGAGCTGATGGGTTGAGATCATCCCATGCAATCTTTACCATTCCCTCTCTCCATAATGCATAGACTACAACCTGAAACACATCTGTAGTGGC         | A/G |
| 1 | PERL_143530_Ler | CTTGCAACTTCTTAGCTATCTCTGTGCATTTCTCCTCTCTTGTGTCTTCTCTGTTTCTCTGTCTTGTTCGGATAAATCATGCTTCTCTCTCGCGAGTTC[A/G]GACT<br>GCAATGATCCGACAATTATCTTCAAAGTTTTACCTCGGAATTTGCTTTCTCTATGTTGGATATAACTTCTTCAAGCTCCTTCTAGCAGAAATCAA      | A/G |
| 1 | PERL_147948_Ler | CTAATTAACCAACCGATGGACTTCTGTGCTTGAAGCTCTAGCGGTTTTCCGGTGGTTTTGGAGGTGCCTTTCGTTGCTTATCAAATCGACGATGAACGGCGA[T/C]GA<br>TTATGCGTCATCTGCTCCTCGGGTCAACTTTGTGACGACTATTACTTCCCTACAGGAATTAGTTTTCTCTGGTGGGCTTTTCAATAAATTTGGCAT    | T/C |
| 1 | PERL_152362_Ler | TTTGAAATCCACGAAATAGGCGATTAATCCATAACAAATTAACAGATCTGTTTCGATCTCAAGCATAGAGAACCCAAATCGTATACATGCGCAAGAAG[A/G]AAG<br>ATAACTACTATTTGACCCACGAAAGATCAATGGATGCTGAATTAACACAGAGAGAAGAGAACCAGGGATCAGATTCGGAAAATTCAGGAA             | A/G |
| 1 | PERL_155480_Ler | ACGGCTTGATTTATCTGCAACTGAATTCAGACATTTTCTTCCGATCTAATCACTCTTTTTGATTACCAAACCTTTTTGTATATGTTGGAGCGTCAAGC[G/A]TTAG<br>GGCACCAACCAATCAGCATCCGAATAGGCAGCAAGACAGAGATTCTTAGAGCGAGTATGTGAACACCATGGGTAATGGTTCCGTTTATGTATC         | G/A |
| 1 | PERL_158268_Ler | AAAAAGAATTAACATCTTTATATAATTAATGAACAAATGAAGAACAATAAGACACAAGTAACATAAAAACCTTTAGAGGCAGCATAGATAGGATCAA[C/T]GGGC<br>ATTGGATAAAGACCCGACGCTGATCCCATGTTAATGATAACTCCAGGCTTTTGTGTTGCTTTTATAGCTTTGATCTACACAAAAGTTGAAAATCAT       | C/T |
| 1 | PERL_160456_Ler | TATTTACTTTTCATTTCAAGTTCTCAGGATTTCCGAGCCGTTAAATTTGTTTGCATAAGGGAATTACAGTTGTGCTTGTATCATCGGAGACCCTAGAGTAG[C/G]CGA<br>TTTGGTCACTAGGGAGCTAACAAAACGAGGCTTGTCTGCTTAATCTTTCCACCAACTCATGGTATCGGGGCTTCTTAACCAAAAATACGGTTAA      | C/G |
| 1 | CER481644       | ATTCTCACATGGTGTGTTAGAAGAAACCTTCAAAAATCAAAAAGAAGCTGAATTTCTTCACTGTAACCTACCGAGCCAATGGGGTCACTTCGGTACCAAAG[G/A]TCA<br>AGCTTACTTCTATAGAACCCTCTGAGTCCATGTCTGAAATCGCTCCTCCCTTGAATTTTTCAGATGTCAAACACTCGTTTAAATTCATAAACAACACTG | G/A |
| 1 | PERL_166550_Ler | AACACCATTGAAAGAGTTTCTCGATAAGTACGAGCTAGCTCTTTCAGAAGAAGCACAGGGAAGAACTCTCAGCGACATAGAGTCTCAAACCTTGAACACC[G/A]CG<br>GAGCTTAAAACAAAGTGTCTTTCGAGACACAGCTCTCGAGAATCTACAGGAGAGACATGTTCAAGAAATTCAAATAGAGGTAGAAGAAATGTACTC      | G/A |
| 1 | PERL_168980_Ler | CTCGTCGAGAAGCACATCTGCCACCAGCTTACCTTTCCGAGATGCTACCACCTTCCAAACTGTTACCAAGCGCAGCTACGACAACATTTGCTTTTGGCCGC[T/C]TC<br>AGGACATCAATGATAGCAACAGCTTCCATTTCTCCGAGCCATCTGCAATGGGTACAAGAATCTGAAAAGGAAAAACATGATCTCTCAGTGTACGGAA    | T/C |
| 1 | CER425903       | ATCCAGTTATAATTTGACTCATAAACCCTTATAGAACCCTCGATCCCTAAATATTGATTTTAGAGACTCAGTAATACTCGTAACCCGCGGCTCTCCCT[G/T]AGTT<br>GAACGGTGGCTGACGTTGGGGGCACCAAGACTCACGCATAGGTTTCATCGGCAGGGTAAACGACAAGCTCACGGATGTTTCATCGGTTGGATAACAT     | G/T |
| 1 | PERL_174514_Ler | TTATGTGCTTTAGACAAAACCTGCGATTAATCCTCCTTTTTCGGAAGAACACGTTTTGCTACGTTGTAGAAATGGTGGGAGATCGAAGTAGTAACGGC[T/C]TGT<br>GCTGCCACGATTAGATCAACGGAGTTATCTCCGCGACTAGAGCAACCAATTTGGTCTTCGGAAATTTGTGGGAGGTGATGTTAAGTACTTCTTT         | T/C |
| 1 | CER480463       | TTGTTTATTTCTCACTGACCTTTGTCACAACAACAACTGGTACAAATGAAACAAAAGAAAATCATAGAAGCTAGCACAAAGTTGTTGCTGCAGA[C/T]TTCCG<br>TATGAAAACACATTTGTGCTATTGAGAGTTGAGGACTCAGCGCAAAAATGGACTATCATATTTGTAGTTTTACAAAAGAAAGGACGAGAAAACAAAAGCAAA   | C/T |
| 1 | PERL_180543_Ler | GAGAACTAGAAGTGGATTCTTCGACGAATCTCACTGTGACGTGAAGGTACATGTCAAACGGCGCTGGAACCTCGTTCCGGATGCTAAAGCCATCTCAACGCA[A/G]A<br>GACGAGTGCCTGAGATACTGTCTGAAAGATTGTTTCGAGGAGAGGAGAGGTCTTGTGTGGATCAAAGTTAACGACGCTTTTTAAGATAAGTTGAGTGA   | A/G |
| 1 | PERL_185054_Ler | TGGCAGATTCATTGATGTGTTGATTATGTTTAGCTGAAGAATTTCTGTGATTCATCTTTAACCAATTGTGTTGATGTTGTTGGTGTATGATGACGGCGAC[G/A]TTTTG<br>ACTGCTTACAGAAGACATAGGGTTCCTTACACCAGAGTTCTGGAAAGAGACTAGATTCTCCAGATCGCCCTACCAAGAGCACACTGATTTCTTGT    | G/A |
| 1 | CER428933       | TCACGTTTTAACAGTAAGACCCACAGTACGCAGACAATGAACTTCAGGTTGTAAAATACACATAAAAATAAACACACCACAGATACGCACTACAAGGTG[C/G]JAG<br>GCAAAACACTAGAAAAATCATAAAAAACAAAATTTGAACAGTCTATACAAAACAAAATATAGAGATTGAAGAGACCGTTGCTGCAATGTAATAACA      | C/G |
| 1 | PERL_191685_Ler | AATAAGGAGCAAGCAAAGCCAATCCGGTTAGGAGAAGAATGGTGGGTTTCATTTGGTTAGGTGAAAGTGAAGAAACTTACTTTGAGAATGCCTTTTCT[T/C]GG<br>GTCTGAAGCTATATCGGGAATGTTGAACCCGCATGAGATGAAACAGATTTAAAATAGGTTGCTCGATTCCGGAGAAATGTTGATGCTGCACTCGCAAC      | T/C |
| 1 | PERL_195268_Ler | CATTTATTACAGAAGGTTGTTTATAGCAAGAAGCAAGCAAGAACTAACTAGTTCTTCAAACACCATAGCTCCTGTTCAAAGTCAAAGCAAGCACTCG[G/A]AAT<br>CACTTGCGAAGTGAACCCCTCCTGCTGAGTTTTCCAATTTGTACAATGTACATTATCAAGAACCATTTTCATGTTTCTCCCGGTTGTTTTGATT          | G/A |
| 1 | PERL_199396_Ler | TTTTTATACCGGACAAAACAGGCTGAATTCATTGAGGACAATTTGATGGCTAAAAGGGAGATAAATCCGCAACGGCCTCAGCCACTGCTGGACTATC[A/T]GT<br>AAACGCATAGCTGATGACGTGACGCCACGATAAGACCACGATGGCTTCGAAAACCGATAGTAAGAATGATACTCCCGTTGTACGACTGTGGAGAACG        | A/T |

|   |                  |                                                                                                                                                                                                                       |     |
|---|------------------|-----------------------------------------------------------------------------------------------------------------------------------------------------------------------------------------------------------------------|-----|
| 1 | CER446517        | CGAATATGCTATGGTAATATATCAACTTGAAAAAGAATATAGTTTTCAATAATAAATTTTGTGCTTTTTAGTGTGAGTACCTCGATTGGATCGCAGACC[T/A]GTGTGGATTCCCACATGTTGAACATTGGAGAGATCAAGAAGTAACTCGCGGTTACCAGAGACTGGTAATCAACCAGAAACTTTCCGTGATGAATGGGAT           | T/A |
| 1 | PERL_206982_Ler  | AATTGAGATTCGGAGAAGAAGAAGCTATAAAGTTGTACCATAATGTCATGTGAAGCCATTTGGCGCCAAATCGATCATCCGCTTAGCCTCCGC[G/C]GCAAGATTTGCAAAGTCCGATGCAACATCGACGGAGCGATCTTCGGCGACACACCCACCATCTTCTGGTTTCAACGAATATGGTAGAGAAGAAGAAAT                  | G/C |
| 1 | PERL_211165_Ler  | GTGCATCAACTTACCCTGGAACTGAATACTCCATTAACGGTGATCAAGAGTTCGTTGAAGTCACAATCGATCTTCAAGACGATGACACAATCGTTCTTCG[T/A]AGCGTCGAGCCAGCAACCGCCATTAATGTCACTCGGAGATATCTCCGACGACAACACCCGGAATAATGACTCCGGTTTCGATTTTCGAGATCTCCGACGATGA      | T/A |
| 1 | CER425307        | ACTCCTTAGGCCAAAGCCACTAGGAACCAAAGGTATAGTAAAATTTGTTTCGGTAAGGTCATAAAATATGTAATTAACATACTTGCTTTGATAACACAAG[T/C]GGA GAAAGGCATGTCGAGACGACGTTGCACAGATCTGATGGTGATTCACACCTCCAACAGCTTTCCACAACATATGTACTTTAGGATCATCCT               | T/C |
| 1 | CER431810        | CCTGAGAAGGGCAAGAAGATCGCCAGGGCAATAGTTCTGATCAATGAGGATAGGATATGAGACATTAACCATAATAGCTCCTAAGAACCGGACCCTCTC[C/T]A CGAACCCGTTGCTATGTCGCGGCCACGACTTGATCCTAAGCCCATTTGCCGTCCGTACAAAACACAGCATTCTTACAGTTACGTTTTCCACGCTTGCT          | C/T |
| 1 | PERL_223567_Ler  | CTCACTGGAGAGGTCAGTGTGACAAGAACCCTGAGAAATGTTGGACCTCCGCTTACAGTCTACAGACCAGTGATTGAGTCTCCTCTTGGTATCGAGCTTG[A/C]T GTGAAACCGAAGACTCTTGTGTTTTGGTTCCAACATAACAAGATTACTTTTAGTGTGAGAGTGAATCGAGTCATAGAGTTAACACTGATTTTTATTTT         | A/C |
| 1 | PERL_227196_Ler  | ATGATTTCTCATTGATCACCCAGTCACTCAATCCTTTTCTTAAACACTTTTCAAAATTTGGTACACTTCACTTCTTCTTTTGTATCGAAACTCGT[G/A]GGAAC CTTACCGTGAAACTGGAACGACAGCTCTCAGGATATTTTTCAGGGCTTTTCAGACACTGAGATGGGACCTATCTCAGGACATGTATAGCTAGAAA             | G/A |
| 1 | PERL_230392_Ler  | TAACCTTCTCACCACACAAAGCAACTCAACGCCAATCTTATCATCCTCTCCATTATCACTCTCAGGTACATCTTGAACAATGACGCGCATGTAGTCAGCT[A/T]GAG CCGTGGCGATTGTACCGATGGCTTGAAGCTCAACGAGGTTAGGTTTTTCGTCTAACGGGAGAACCAGGAGCTAAGAAGGATCTGAGAATAGTCTTGTT       | A/T |
| 1 | PERL_232983_Ler  | TATCAACTAGTCTCAACAATTGTCAAAAGCGATGCACAAAACCTTTCAATGGTGAGAGGAGAACCCTCCGGTAATAGCGGCGGGTAATGGTGAAGTCT[C/T]AC TCTACATTTGGGCAGCTGTTGTGGCTTCTCCGTATAGCAGCCGTGATTTTCTGATGCAATGACAGCTTCTAAACCTCACACTAACGACGATGC               | C/T |
| 1 | CER465324        | CATTAATTGACACAACCAGAACACACGGACTATGGGCTTGTCAAAGATAGTTGAACATGCGTGAGTCGAAAATCCAGAGAAAACATAAGCCAATTGGTG[A/T]AT CGCTGCTTACCATTGAAGGAAGATGAGGCCAATGCTATAGATATCGAACCTATCTGGCAAATTCATCTGTTTGGACAAAACAATAAGTATCAAATTC          | A/T |
| 1 | PERL_238431_Ler  | TATGGCCATTCAAGAAACATACGCTTGAATGTGACCCGAGTGAGAGACTTGTGAAAGAAGCAAGCAGAGACTTTGAGACTGTCTATGTAGGCCAAGTTTG[T/C]CT CTCGTGGGAGATGCTTCGATGGCAATACGACAAAGTCTTGGAAATTTGATTCACAGGTTACTACTTATCAATACAACTTAGTAGCTGGAGAGTTTCAGT       | T/C |
| 1 | PERL_241367_Ler  | CGCTGATTAGGAGCTCAAGCTTTTATCATTGAAAATTGATACAAAGTCAAGGCTCAGCAGGATCAACTCATTAAAGCCTTCTAGGAAAGCGTTGATTTGAGGGCG[T/A]ATA GCACCTGGTAAGTATGTGGTCCGCCACAAGGTCAACATATTCATGTTTTGTTTTCTTCTGTTACCCGATGTTTTCGTCTCCAGGTTTAAAGTTCATAGT | T/A |
| 1 | CER425902        | TGTTAGACATGAATCTGCTAGAGACTGCGCACAGAACCAGATTTCTTAGGAAGCAAGGCCAAGAGAAGCTTGGAAAGAGCGATATGGAACGACACCAA[T/C]T TCTTGGCTGTAAGTGTTCATTACCCCAATTCATATTTTGTCTTAAAGTGTTTGATTAATCTGTTTCCCATTATCCTCTTGTGGTTAGTCTGTGG               | T/C |
| 1 | CER473460        | AGCCCTCTTTTTCATGGCTCTTCGATCCGCACTCTCAATGCTGAACATGACTTCTGAGGGTAAAGAGTTTATGAAAAGATAGTGAAGCGGCTGCACGCA[C/T]TA AGCTTCCATATGAGAAGCTACTTTTGGCTCGATTCCAGCAGCTCAATGACATTAACCTTACAAGACGGAGGAGTACTCTCACACCCGGTAAACAA            | C/T |
| 1 | PERL_248424_Ler  | ACGGTGGAGATTCTACGATGATACACGTGTAAGTCAATGCCGTTATGAAGATGTAGATCCGATCTATCCAAATCAAAGTTACAGAAAACGGCATGAGGAA[G/C]GT AAACCACCGCCGGAAGATGTAGATCAAACAGAGGACGGTGATAATGGAGAAGGAAGTAAGGTCCGTAACGGCGGTTCCGAAACTGAGAAAAGTTGAGGT       | G/C |
| 1 | PERL_251951_Ler  | AATTGCAGATATATAGAAGGAATCATTGATTTTACTTACTCTCCAAGGCAGCCATGTCTATAAGGTGAGGTCTATCTTCTCCGTGATATCTTGAGC[C/G]ACA AGGTTCTCATCCAATTAGGGTAGTCCACAATGTCAATGCGCCACAAGATTGGTGTCCCATGAAACAAGTAACTGCTCAAACCCAAGTTTCCGAAG              | C/G |
| 1 | CER468291        | CATGGACATTGATACCTAACATGTTACCTGAAAAGAGCAGTGGAGGTGGAGGAGATCAAGCAAAAAGAGATTGCTGCTGCAACAGCGGCTTCAGAGGCTCC[C/A/G]C CGCTTGTAGCAGTTGTAAGAGCAGGCTTTATGCTGCGAATTACGCGCAGCAAGAGGTGAAGAAAATACGATAAAAAGGCTTAAATGTATGGAATAAGGTAG   | A/G |
| 1 | PERL_255454_Ler  | CAATTTAATTTGTGAAAATATATTGTTTTCTTTTTGTCTTTGTAATGTCTTTTTTCAGATCTACTTCTTAGCTTATGAAACGAACTCGCGCTCATTGGCT[C/G]CAAGT GTGGAGATCTTGTAAAGTTTGTTCAGCAAATTAAGGTTCAAATTTTTTATGATACAAAAGTACAAACCCCTTATTCATATAAAATGGGCCATTTTTTC     | C/G |
| 1 | PERL_257106_Ler  | ACAGAAGATCAAAATCCCACATAAGATTCTTAATGCTGCAACTGTCTTACAAATGTTCAAAGATTTTCTTCTCATAACTACAGTATCACGC[G/A]CAGA GCATAGCGAGTGGATAAGGCATGAAATGGATGAATGGGAAAGAGTGGGAGATACCTGAAGCATTAGCTCCGCTAGCTCAGAGTTTTAGAT                       | G/A |
| 1 | PERL_258427_Ler  | ATTACAAATACCTAGGATCCATGTTGATAAGATCACACAATTCATGTTAATAGCCCAATCTGGACCAATCAGCATATCATTGTAGCCCTTCTGCACA[T/G]GCAG CCGCATCATTGGCCATCTTAACAACCTTATCAATCAACTCCACAAGTTTTCAAATTTTTCTATGAAGACACCATACTACTTTAGTCCAAAG                | T/G |
| 1 | CER468885        | AGACAGATACGTCCAAGCAGCAACAGATCACACAGGACTTGAAGTCCAGTGGGATCTTCCATTTATGGGAGCGCAGGACAAGCGAATGCTCGTCTGCC[C/T]G AGGAGTTGCATACCAGTGTAGCTCAGCCACAAAAATCAGATAAGCATGAAAAGGTTGCAAGTAGCAAAAGGCCATCAGCGCCTCGTAAAAGAAAT              | C/T |
| 1 | PERL_262340_Ler  | GATTTGGTTGGTTGTGGCAGGGAAAGAAATGATTTGGGGATTAATAACGCTTAAACGCTTCAATGGTCCAAGACTCCGAGATCATTGTTCCACATTCCATCAATACA GCTTCAAATGGCAATCTTCTCCATCATCTTGTGGCATATTACGATTTCTCAATGGTCCAAGACTCCGAGATCATTGTTCCACATTCCATCAATACA          | A/G |
| 1 | PERL_264296_Ler  | AACAATGCCTTGACCTCTACGATTTAAACGACAAAACATCAGGTAATAGGGAAATTAATAACCTTAAAGAAAGAAACAAAGGGAGATAAGACACCGCCA[G/A]AAA GGTAAACAGAACCCAGCAGATCAAAGATATCTTTTCAAGATCACTGAGACAGAACTAGCCTTCTTGCATCTTCAAAGAACTAAAGAAATGGGAC            | G/A |
| 1 | PERL_266525_Ler  | AGGTGGTAAACCTGACGAGCGGCTCGATAAGCAGTTAATCTCTTCTTGGATTTGAGCAGTTAGACACCCAGAGTGGCGTAGTCTCCGGAAG[T/C]A GCAAATACGACGAGGGAAACGGCCCGTCGATTTTCGATAAGGCGTAGACGAAGAAGACGAAAGATGAAAGCGACAAGAAGCTCTTGTGATACCTGAAATTTG              | T/C |
| 1 | *PERL_268547_Ler | TTCTGTCCGAGAAAAGGAAAGCTCTGTTTCGAGCCACTTGAACCCATTACGAACTTGAACGGAAAGCGACCAACTGCGGCTGATTCATTGTTGCCACCGCC[G/A]G ATTTTCGAGACTGCAAACTACCCAAAAGGCTGTTGATCGGTAAGAAGAGGAAGCTTGTGAATGTTGATGTAGTTGAGAGCATGCGTAGAATAGCTGTCC       | G/A |

|   |                  |                                                                                                                                                                                                                     |     |
|---|------------------|---------------------------------------------------------------------------------------------------------------------------------------------------------------------------------------------------------------------|-----|
| 2 | *PERL_269150_Ler | ATTCCCCACTTCGGATCCTTCATGACTCACAACAGCTATTTTCAGACATCAAATCCTCCCGCTGGAACCGCTGAGACAAAGTCGACGATGAATCCAAGTC[G/C]AAA<br>CTAGCCTCATGGGCATGCGAACCACATCGCATTGAATACACACACCACCTGGTCTCCCAACATCTCTTTGTTCCACACGCGATCGCTTCCCGTTGGAT  | G/C |
| 2 | PERL_270864_Ler  | TCCTCATGGTCTCATGGTCTCATGGTCACTGGAGCTCCATTGTTGGCGTAAGTGTGACAAGGGCAAGACATCTCGTTAGCCTTCTCACTTCTCGAG[C/A]CG<br>ATCACAACCGGTGCTTAATCAATCCTCCTTCTGCCATATCTTCAAATCCATCCGTACACGTGTCTCATCCGTCATGCTGCACCTCATCCACGTCT          | C/A |
| 2 | PERL_273021_Ler  | TTGGCGTTGTTGCCCTAATCGGTGTCCCGTTTCTAGAAGTTCCTGGCTCGCTATAGGAGTCATTTTCAGTTCCCATGTCTCTCATTGACACAGACCTTGC[C/T]GTT<br>GAAGGCGGTTGAGCAAACGCAGTTGCGACTGACGAGTCATGACGGCTGAGATTAAGTGAAGAAAGCAAGTAAAATTTGGCTTTAGAAGATAAATAGA   | C/T |
| 2 | PERL_276304_Ler  | ACTTGTCTGTTACATACCACCTCGTGTGAAGGTAAGAGACTAGACTATCTTCAGTACGTGAGGAAAAAGAAAGATGGAGCATTGATATACGCGGCTCA[T/C]GC<br>AGATTACTACATCTTTTGGCGGTTTGCTAAGTAGCTAGATGATGTAGGAATATGCATAGAGGTGTGTTGAGCTTTGAGAGGAGATTTGGCTT           | T/C |
| 2 | CER427280        | CATACCAGTACTCCAATATATGATCCCAAAAGGGTCCACCTATAAACTTCCCTTCACAAAACGCTTCAACCGCTTTTTCGATAGGATAATCCGCGGTTTC[C/T]TCA<br>GGAGCTAGCTTTTTCCAAAATGCCATAAGGACACAACATGTCTTAGGGTTCCTACAACAATACACAATCTTACAAGACGAGCTCTTAACAGACT      | C/T |
| 2 | PERL_281027_Ler  | CGTTTACTAAATACTAAAAACAAAAAAGAAATATATATCTCCGACTTATAATTACATATACAATATTTGGGCCCTTAAACACATAAGACCAATCGAAT[A/T]GCCTT<br>GCTGTATCACCATTCAACCCCATGTATATGGTTGAGTTTATCTTAGTTAAAACAATCCAACATTTCCCGACATCTTAAAAAATTTTTTTTTT        | A/T |
| 2 | PERL_284251_Ler  | TCACCCATGACCCGAGAAAAAGACGAGCTGTTTTCTCATTCTTTAATTAATCGAAACGTAAGTCTATCACCCACTGTCTATCTTTTCATCGGAA[T/C]CGTC<br>GTAATCTCCCTTGTGCTCTCCCTCATTCTTAACACACTATCATCGTCCCGCAACTCTGTTTTTACCACCAACATTTTCACTCTCGACACT               | T/C |
| 2 | PERL_288159_Ler  | ATTCACTTTAAACATTTGCACCTTCGGGAAATTAAGATAAATGAAAAATCAAACCTCATCATTATCTTCTTGAATCGCTTATAGGTACGTAGTAAAGGCTG[G/T]CCAC<br>TTTGTGGAGAAGACACTATCTTACCAGGTCTGAGCAGTTTGTAAAAAATGTTACTTCTCGCTTATCTTGGCCAATCATGCATCTCATTGCCCTA    | G/T |
| 2 | PERL_291873_Ler  | ATTTGATCCGTCGAAGAAGTTGAGGGTGTGATGACACCCATCTGGTATCGCTTGACACCTACGCTACGTTGCGAGCAACGAGTTGCGCGTTGAGTTGC[A/G]C<br>CTGCTCCATTATCTGACCTCATCATGGATGATTATGTGATCATCTAGTCTCTGCCAGTGACATTATAGGCTTGTCCATCATCTCTCAAAACTCA          | A/G |
| 2 | CER442147        | CGTTTTATCGATTTTTTCAATTTTTCTAGGGTTTCGCGCCGGGATCTAAAAATCACAATCATGCCGGTGAGTTTGACTCCGAACGCAATCACGGCGATA[C/A]ATG<br>ACGGCGACGTGAATTTGAAGCGGTTGTTACAGTTTTAGAAATCAAATGATAGGAAGAAGTCAAGAGAGAAGCCAGGAGAGGTATCGTTTCCCTCAT     | C/A |
| 2 | PERL_298019_Ler  | TGTCAGCCCAGTACATATATAATCTTATGAATACAAAGACTCATCGTTAACGCTGAATTACATATCTCCTTCGTACCATTCTTCCAGGTCTTCCATGGCT[T/C]CCGA<br>ATCAACATGGACTCCAGCTGACTTCGGAAGGTTGAGATTTGCTATCATTGTCAACACCAGACAAAGTAGACTTTGGATACATTGCCAAGTATCT     | T/C |
| 2 | PERL_301285_Ler  | ATTCATCAAACCTCCTTCTTCTATTACGCTCTCAAAGACTTCACGGTTCCACTTTTTAATTACTCTTTAGAGCTTTAGAGCTTACAGCGTCTCT[C/A]CTTC<br>CGTATCCAAGAAGCCTGAAGCAAATCCTTAAACCCTATGGGTAAGCCAAGCCGCTTCAAACCGGAAGGGTCTCCTCAGCGGATTACTCCGCAC            | C/A |
| 2 | PERL_301533_Ler  | TAATAGCAGTTAAAACAACATGTTATATAAAATAAATACATGCTAACATATTTAATATCTAGATAAATTTGTATGAACGTGCCATCTCAATCCACGTTTT[T/C]CATTCA<br>CGCCACCTCTTTTTTGTCAAACCTACCAATACTGATTTAATATCTTTGTTTCGATTTGATTTTATGTTTCCATTATTATTCTTATAGTTTTGT    | T/C |
| 2 | PERL_302774_Ler  | TACCAAACCTGCACTAGATAACCTGAGCCTTAAACTGTTCAAGCAGGGAACTCCAGTGAGATCATTGTCAAACCATAGATGTCACACAAATCTCT[T/C]GGT<br>GGTAGACTCTATCTGACACCCGAATGAAGTAGATAAGACTCCTTCTGAGCATTGCTTTTTCTGTCACTTACACATAGTAGACCCTAACAGAAACCA         | T/C |
| 2 | PERL_304972_Ler  | AGGATTCGATTAGAATTGAAGCAACAAATGAAAGATTACTTCCAATTCACACTACAAAATTTTCAATAAATCAAGGATTCAAGAAGAATTGAAGCGCGAA[C/G]GATT<br>GAACGACGAAGATGCAAAGGCTTTTTCGGGTCCGCCGAAACCCGCTACATTTAATGGGCATGTCTTGTAAATCCGCAATCCAACGGATCATA       | C/G |
| 2 | PERL_307094_Ler  | CACATTTTTTGGATCAGTAATTGTACGTATATACATTGAAAAATTTCTGATCTCCGAATTTGTTATTTATAAAACATGACTTCTCGCGAGCTTCTAA[G/T]CACGG<br>AACCATCCGTTCAAACCTCCCATAGTCCAAAAAACAGTCTCTCTCCATCTCATCCGCAAAAAAATTTTCTCGTCTGCTTACTTGGC               | G/T |
| 2 | PERL_309922_Ler  | TAAATCCAAGACCAGATTGTCTCCTCAATCAAATTTGAATCCATTCAAAGGTCGTTGACACAAATCTCCGCAAAAGCTATCGAGAGAATGGCAGCTT[C/G]TAA<br>CGGTCAAATCTGCAGCTCGATTGGCTTCCGTAATCGTTTGTAAAGTCTTCTTTCTTAGCTTCTGAACTAATTGATTTAATGCATTTCTACATAGT        | C/G |
| 2 | PERL_312769_Ler  | GATCTTTTCCATGATGGTTGTGCACTTAGCAGCGTGAATCTCCTGCTTAGAACGACGCTTCTACGATAAGGGACAGAGGAGTAAGCAGATTCCGAGGTG[A/C]AT<br>TGGGATTCGCACCTCATATGGTGCAGTCCGACCAATGTGATCGACACTAAGCAAGTTATGAACGAACTAATCTAGCATTACCTCGCCATC            | A/C |
| 2 | CER445429        | ATCATTTTTTGTAATGTAATGTTAAATTAATCAGAAAAATAAAAAATGGATCAAAAAATTTTTTTTATAATAATTTTAACTCGACTT[C/C]GGATGGT<br>AAACCGGACTACCTTCTGAGTACCGGCTATTGTTTTGCTTGGTTCGATCATAGTAATTTTATAAATTTTAAATATATTTTTATTTT                       | T/C |
| 2 | PERL_319622_Ler  | ACAAAAGACATAAGTCATTTGCCCAATATCACATGTGGCAATTAAGACATAATTTTTAGTGAATACCTTGAGATATTCTTTGTTTCCAGAAATATGTCGAGAG[G/T]GAAC<br>AACACCAGATGAGGCTGTTTGGCTAAGGCCATTGACACAATCATCTCTCCATAACTTGTTTAGCCGCTTCTCCACTTCGAGAACAAGAGACTC   | G/T |
| 2 | PERL_323687_Ler  | AATTTGTTTACCTACAAGTAGATGATTCTACACCTCTAAGGAATGACCTACGCCACCATATCTGAAACGCTTGTGAGATTAGGGCACTCAGTCCCATG[C/T]TTT<br>GAGAACCACCTGAACCATTCATGAACACTTGATACCTGCTTTTTACTGGTAGCGTAAAAGCGTTTCCCCATCCCTTCTACTTCCCTCATGT           | C/T |
| 2 | PERL_326605_Ler  | AAGAAATTTAGAAAAGACGAGAAAGTTTAAACATAACCTACATTGGTTCCGTGAACGATATTGAGAACCCCATCAGGTTAAACCAGCTTCCATTGCCAACTC[G/C]GCA<br>AGTATTACAGAAGCACCTGGAGAAAGCAAGTAATATCAATAATCAACCAATCAATAGAAGGGACCTCTATAGCTATAGTGGAAAACAGTCAATCAAC | G/C |
| 2 | PERL_328856_Ler  | TCCCTATTACAGAAGTCACATGGACACAATTGACAAGAACATAGGATACACTGTTTGGTACAAAAGAGTTACAGAGATACAGATGCGAAAAAGAACACCGG[T/C]AT<br>CAAGGGCCACATCAATTAAGAAGCCTTCCGATTTCTTTCCGGGGGAATAAATAGATGGACATTTCTTCTTAGGCAGTTTACATTTCCG            | T/C |
| 2 | PERL_330675_Ler  | TTTTACCGCGTTGATTTCTGATGAAATTTGGCATTGTTGACATTTAAAAAGTTTTCCGCCGTTAATCTAGAGTTTCTCTTTGGTCTGCATAGTGC[G/A]GTTT<br>TGTCAACGATATAGTCTGTTGCTGATCAGGTTTTAACGGAGGTGAAGGTTTTAAAGCCGTGTTACGCGGTTGAAGACGTCGTGAAGTCTCGAGTTC        | G/A |
| 2 | CER433367        | GGATTCTGTTTCTGATCAATATTTTATCCGTTGTTGTAGTAACAATGGGGATTTGGAGATGGCTTTTCTTACAGGGATGAGATGGTGAACAAGGTATG[G/A]TG<br>CCGACGTTTTTACTTACAACACGTTGATACATGGTTTGTATGGAGAATAAGATAGAAGCTGCTGAGATATTGATTAGGGAGATTAGAGAGAAGGG        | G/A |

|   |                 |                                                                                                                                                                                                                |     |
|---|-----------------|----------------------------------------------------------------------------------------------------------------------------------------------------------------------------------------------------------------|-----|
| 2 | PERL_336286_Ler | TGGGTCCTCGGCTCGGTGTTAAGAGTCTGAAACATGAGCTCAGGCTCATGCTGCATTGCTCTGAGGACATCTGCAGAGGATTGGCCATCACAGCACG[G/A]GTCACTGCGAATCCGTGAGGTCCATCGCTCTGCAATACGCGAACCACGCTTGGTCCACCGAACAGATTGGGACTCCACCGAGAGCTTCTCCATAAGCTC      | G/A |
| 2 | CER432380       | AGAACACGGTAGTGAGTATGTTTCATCTCCTCCACCACCACTGGATTTTCATTTAACTTGGTTAGCCAGTTACAAGATTCTTGGGTTACATT[G/T]CAAA GGCGCATGCACATACCTGTACACTGTCAATCTCACACCGATCACACATCGTAAGGGTGTACGATGAATAAGAAGATGAGACTCGAAGACGGT             | G/T |
| 2 | PERL_340933_Ler | TGGATAAAGGGATGGAGTTATATGAAATGATGAAATCAAGTGGTGTAAAGCTTGAGAGTAATGGTTATGCTACACTTGTGAGGTCTCTGGTAAAAAGTGG[C/T]AAGGTCGCAGAGGCTTATGAAGTGTGGATTATGCAGTTGATAGCAAGAGTTTGTCAAGTGTCTGCGTACTCTACACTTGAAACTACCTTGAAATGGT     | C/T |
| 2 | PERL_343158_Ler | TGATCTGGACCAGATATGGTAAATAACTAATGCAAAATTCCTTTGCAAGAAAAAGTTGAAGAAGTATTGTTGCCACACTCCCACAAC TAGTTTCATAGCG[C/T]CAC CACCAGTAAACATGCATGTGTTGATTCTTAAGGGTTTTAAGTCGACATTAAGGCTAAATGTTCAAATAGTTATCTTACAGATTGTTTTCT       | C/T |
| 2 | PERL_345444_Ler | TTTTTTGGGCATAAGTCAAACAATTCCTTATGGAGTGGAAACCGTAAGACTAATGTTGTAACGCTCAGTCCCTTCTTAGTGAGGCCACGCTTCTCCGG[T/A]TT GTGAGTCCATCCTTATCCGACAATCCTTATCCGACAGTCCGTATACTATGTCTAAAGATTTAAGGACTTGTATCCATCCTACAAGTTATCATATA      | T/A |
| 2 | PERL_347732_Ler | AAAAATGAGCAAACTAGTGGTTACGTTGCGGTACAACACATCATTTCGATGCAACACATTTCTTCTTCTCGTAGCTCTTTAGCATCTGTCAGGCT[C/T]AAT GTCGTCGATTTCATGCGAAGTCTAAAAAGAAATTTAAGAATTTTACTCTCAACCCATAAACTTAAAGATCCGTTTGGTTATCTATCTTTGATTG         | C/T |
| 2 | PERL_349483_Ler | TCTACCCAAGAATAACACAACTACTCGGTTATTCACCCAGGATGATGTTCCGGAAGAGAAACATAAGCATCGAGGACGACTCTCCAGATCCAGCC[A/G]A GCAGGTCAAGATAATGAGAGAGAATGTCAACCTCATCCAAAGGCTGATCTACGCAGACCCGAGATCAGAACTGGAGACGCAGAAAGATGCATTTGA         | A/G |
| 2 | PERL_351339_Ler | GGTTCATCATTGTGTCAGTTAAACATTCCTTTGATAATCTCCTCTTTACCAGAAAACCAAAAAGGTTTCCAAGGTGGAAGTAGGAACTAGGTCTACCGA[G/T]GCA TCACTCGATGAATGGCTCGAGGTTCCGCTCTCTCTTTGTAAGTCTTCTCCTCTTCTCCTCTTCAAGTGTGATTGAATAATCTGATTGAAGGGTATGT  | G/T |
| 2 | PERL_353122_Ler | CTCTAAAAGTACAGAAGCAAATCTATGAATTTACTACACCGGCAAGTGTTCATCTTGGCTCAGGGCATTAGCCAAGCTATACTCTTTGTGATTTCAC[T/C]AGTT CCGGCAAAGTAGTCTAAACCACACTATGCTCAACAATGATTGTTGCTCAGGACATACATAACACAACCAATAACGATGAATCAGAAGCAGACCTG     | T/C |
| 2 | PERL_354658_Ler | TCTTTGAGAGTATTATCAGTATCAATCAATCTAATGTATTATTTTAAATTAATATTATCAACCAGTATCTATTTGATTGTTGATTGCCTTTCACGCCT[G/A]CACATA AAATTCAGAGTCGTCGATATATGTATAAAAAATAATCGTGTGTTAGCCATTAGCACATGAGCAAGTCCAAATCTCCCTCTCTCTCTCTATC      | G/A |
| 2 | PERL_356299_Ler | CAGCACATTCTCCAGAACTTCTGCTTGATAGAGCAACCATCGGTGGTACGGTTACAATTCATCAAGAACTGTTCTCCGACGTTGGTGCAGAAATTC[T/A]CG CCGAAAAGCGGATTCATATCTTCAATCTCCGAGTACAATTTGAGAGAGACCGACAATATACTGTTTTCCGTCACGTTTTGAACGGAAAAGTCTCC        | T/A |
| 2 | PERL_357977_Ler | TTTAAATTCATATCAGTCTTAAACAATCCAGGACAACCGAGTTAACGCGAATCTCGGGATGTTTTTCGCTAAGATCCTCGTGAAGCATCAAACCG[G/A]CTT TCGAAACAACGTAAGCCGACATGACTTTAGCCCAATATTTTGTCTTAGCCGATCTTCTTTCAGATCATTGAGAAGTTGGTTGATCACTTGGTCAAT       | G/A |
| 2 | CER429760       | GCATTAACCAACATCGTTAGATGTAGCTAGACATGCCACATCAGTAGAATCATTGGGAATCACCGACCGCCGATATCGCCGTGGCACTCACCGGTGCC[G/A]T ACCTATTCGGTGGTCTTCCGGCGATGTTAGCCCTCATAGCCTTCGCTTACTTATCTAGCCTGCTCTTACTGGCGCTTGTCAACCTCCGGTGTAGTACT    | G/A |
| 2 | PERL_362547_Ler | TTTTTAGAGAAATGATTATTGGTAAGTAAATAAATACTCTATTTTGGGCCCTTCCGGACTTATTTTTTACTATTTCGAGGGTCTAAGTCAATTTG[G/A]CTGCC GACCTGCTAAATATGGGAAAGGATCCCTCCTTCTTATTTCTCATCACTAATCTCATAAGATATAAAAATTTACTCACTCAATGATTGTGTCCA        | G/A |
| 2 | PERL_364614_Ler | ACTGCTTGAACAATTGGAGTGACGAACACTCGTATCGCACATGTAAGGATGACATCCACTAGAAGAAGAAGAGCATGTCAAAGAACAGCATTGTGAGG[T/C]G GTTCCATGCAGATTACACACCGCACATCTCCCAACCTGTCTCAATAGGCGACTCTGACGCCTTGTGTTGTGCGTCCGAAAGACCGAAGCGGGTATG      | T/C |
| 2 | CER427000       | TGTCTTACCGGCCCTATTGGGTACGTCGCTGTTCCGGTTCCTGGACCGGTCCGATCACAAGACTCTTCTTCTGCTCCTTACCGTCCCCATTGGTTGAT[C/T]CA CCCGTTAATAATGCTCCACAGTATCAGATGGGACCAACACCAGCTTCACATAGCGCAGCTTCAGCAGACTTTATCTTACTTTCTCTTTTGTATCTTAC   | C/T |
| 2 | PERL_369404_Ler | GCAAATAGAATAAAGTAAATGAGACATAAGCAATCAACCAATAAGAGAATGTAACACCCCTAAGAAAATGTTAGGCTTAAGACTTACCTTGTGCTCTT[C/A]GCGA TCTTGCATTCGTGGAAGAGCCGCTTATGTTAATGTCATCAAACTTCATCGTATGCAAAAGCAGAAGGATCCTCCTCTATAGCTTTCTTATGCT      | A/G |
| 2 | PERL_371102_Ler | ATTTGATGAACACTACTGATGACGTGTCGGTTTTCTGAAGATACGACGCCGTGCTTTTTGGGTTAATTGCGGCGACTCCGGGAATGTAGTCATTAGATCGC[T/C]GC GGGTTTTCTGTGATAAAGAACAATAAATTTATGGGGAAGATTAGATAATTAAGGAAATGAAGGATGCGTTCTGTAATTAGTTAAAGGAATAAATAAA | T/C |
| 2 | PERL_372171_Ler | CTTCTCCGTAGACAGATTTGTTGCATCTATAGTACCAGCCGTTAGCCAAAGTGAACCCGAGGCTTACTCTCAATGCTGCTAATCGG[A/C]CC TCTTACCATTCCAAGAAAGCTGAAGCCCTCAAGCCGCTACAAAACCGATTTAAGGTAACAAGTAACAACATAGTATTTTAACTAGTATTTTTTTGTT                | A/C |
| 2 | PERL_373965_Ler | GGTAAGGCTGATGAAGCTTAGGGAGAATGATTAATGGTCCGTACACAGTAGCTCTCATCCACTGAATATGAGCATGCCACCACAAGGTTCCCTTTGTCC[A/G]GT CACCGTGAAGTTGTAACATAAATTTGTCCCATCGAATTGGACATTGTGTCACATAGGACGGTCCATCCGCCAACCCTCTTACTGCTCCGGATAC      | A/G |
| 2 | PERL_375688_Ler | TTTTTGTCAACAAAATTTTTGGACCTTGACCTATAATCTCATGCGGTCCGGAACTAGTCCGGAAAAACCGTTTACATAACATAGTGACAACCCATGC[T/C]GCC TCAACTATGCTTGAATGCTTGAAGTTCGGACATCCAGATATGCTCGATTGATTGCTGCCACTTTTACTACCATTCCGATCTCTATCTTGGTG         | T/C |
| 2 | CER442035       | ATATCTGTAATGGTCTAATAAGAATATGGTATTGTCATGTTATCACGATATGAGCAAATCAAAGAATCAAACCAACAGCTGTTGTAAGCCTGAGG[C/T]GCA GAAAGAAGCTCTTCCCATCGAAGTTCCTCCTTGTCTGTGGATGAGGTTAAAGAAAAGACTGACAATTTTGGATCTAAGTCTCTGATTGGTGAGGGT       | C/T |
| 2 | PERL_378201_Ler | TTCCGACGAAAGCAGATCGTCCACCGAGACGAGAACACGCGATTGCGACGTTAGCGGGAGCACCGCCTGGAGCTTTGAGGAATCCAGGAGCTTCCGGCAG[A/T] JGAGACGCTGATTCGGTAGGAGCAGAAATCGATTAGCATCTCGCCGAAGTCAACGATCAGTCTTATACCCGTTGATCCGCTTTAGATCAGAGATCTGT   | A/T |
| 2 | PERL_379592_Ler | TTTTTGTTCATCAGTACAGAATCCCTGGTGGTGGACAATATACCCTGGATACACAGCAACTGCAATTCGCTCAGCAATGATCAGTACGCCCC[T/A]ATT GCGATTCTGATATTCATCCTGCAAGGTATGCCTTATCGAACAACAGTAGAACTGGCCTATGGTTTTTGGAAATGTGTTGGTAGTTTTAGGTATAAAG         | T/A |
| 2 | PERL_381438_Ler | CCTATGTTAAGTTCAAATTCATGTTTTGATTTAATCTTATCTACGGTTGTAACCGTTTTAATCTATCTCATTATGATCATTCCGGGACTTTTCG[G/C]CATCGA GTACCCGGTTTTCTTCCGGTGTAAATCGCATTGCAAGATTAATAAATATTGTTGACAAAAAAGGGTTTTCAAATTCATGACTTCAAGCTATAT        | G/C |

|   |                  |                                                                                                                                                                                                                  |     |
|---|------------------|------------------------------------------------------------------------------------------------------------------------------------------------------------------------------------------------------------------|-----|
| 2 | PERL_383347_Ler  | CGGAGGTAACCCCTCGCCATTGGGAAAGACAAAAGGAGATTTGCATGGTAGCGATCTTGACCGTCGATGTTCTATCTTAGAGATCTAATGGTTAGGAATT[T/G]ATGGCGGTACCACCCCGGTCAAAGTAAATGCGTACCGCTCGATATTTGACACGTCGCGGTAATTTAGCTCCGGTTTGACAGATAGACGATACGAGAGATTACC | T/G |
| 2 | PERL_384706_Ler  | CTTTCACCCCAAACTAAACCTTTGAGATGCTTACTCTAAATCTGACTTTAGCTTGTATTATTTGTCTTAGCGTCTACATCTGTGCGAAATTC[T/C]ACACAACAGCTGCGTAATTTCTCCATGACACTATTTGCGTATGTTTTCTCAATCTTAGTCTCATTCAACCAAGCTTAGTGTTTTATTCTGTACACAACCT            | T/C |
| 2 | CER427509        | CTCAGTATCTGGACATGGTACTTCAAATAATAGTTTCACTAATGTGAGCAATTTGACCAGCCTGTGACTCAGCAAAGAGTCTTTTATTCTGAGCGAACT[G/C]TACGAGATCCAACAGAACTAACCGTTTGTCTAAATCTGATGATTCCCTTGCTTCTCAATTTGTAATGGCTCAAACACATCAGATGCTTTCCTGCCTAT       | G/C |
| 2 | PERL_387436_Ler  | TGTTCAAAGGAGCAGTCCCGAGGTTCTTCTGGGTGGCTCCTCTAGGTGCTATGAACTTTGCTGGGTACGAACTAGCCAAAGAAAGCTATGCAGAAGAACGA[A/G]GATGACAGTGTAGCGGATCAGCTTGGTCAGAAGAAGCTTGTCTAAATGGGATTTACTTTGCTTTGCTGTCACGAAGTTTTTTGGGGCAGCTTAAAGCCGG   | A/G |
| 2 | PERL_388688_Ler  | TTTATCTCTATAATACATTTGCTTATCGGTTTAGTTATTGGTCTTAATTTGACTGATCTTATTGTGCATGCAGGACAATACAGGTGTGTTCCCGTTGAG[T/C]TATGACCCCGTCAGACACAAAAGATAATTTACTTGGTACGCCAAACAGTTTTTACTTGTGATGTTTATCTGTTATATTTAGACATGTTTTTTTTGTTTAT     | T/C |
| 2 | PERL_390343_Ler  | TAGTGAACACTGAACAACGGAGTGATTTGGAAGGCTTCTTCTACCAGAAAGCATAAAGCATCGATAATAAAAAGAGACAAGCTCCACAGGCTTTGCAG[G/A]CTAACCGCAAGAACCAAGCAACTATCACAGTAACAGATAAGAGCTTGTGATTCATATAGTCTAAAACCAAAATGCTCAAACATAATCCAAATCTGAT         | G/A |
| 2 | PERL_391711_Ler  | TTGCTAATATCAGAAAAAATAAAAAAAGTACATATTTGTAACAACACTACAATAAATAAAAAATTTTCTTAGTTTAAATGTTTTCTTACCAGGTTG[A/G]AAATTTATCCCTCTGAGTAACATCAGTAAAACTACTCTACGAATACCCTGAAACATACATATAAAATCAGAGAATTTTTCTACTAAAACCCGGTCTTTTC        | A/G |
| 2 | PERL_393403_Ler  | TGCAAACTAGTTTTAAGCAGTTCAACAAGAAATTTTGGGCTCTTCTTTTTCGCCTAAACAGTTGTTCAAATTTCTAACTCGATCATTGATTACTGC[G/T]AAAACTCGACCACCTCATTGTAAGTTGTTGAGAATTTATGATGTTTTCTTTGCACTTGTTCCGAGTAAATAGAAATGTGAATGTAGTAGCTAGCTGTGCTTT      | G/T |
| 2 | PERL_394981_Ler  | TGGCCACGCAGATGGATTTCTCTTTCAATAAAAAGTGCACAATAGTGTCTTCAATAGACCCCAAAAACATATGTAAGCTGTCAAGGATAGCTCTAC[A/C]GGGTACGACTTAAGCGTGATCGCCTGCATAAAACAATCATTITAGTGGTTAGTACTATATAAACCGTTTCTAATATATTGAACAATATAAAATTTGG           | A/C |
| 2 | PERL_396668_Ler  | TCGATAAATGGGAACTCATGACGCCGGAGCAGAAGTTAGATCCGAGAACTTTTGCTGATTGTTATCATTGGTGTCTTCCGGGATTGCCTGATTCATGGA[A/G]CGAGTTGCTCTCTGTATATCATCTACAAAATTTAAATGTTTTCTGATTGAATGTGAGAATTTGCAAACACCAGATTCCTTCTCATCGGGAACGTC          | A/G |
| 2 | PERL_398212_Ler  | AAGAGCATGAGCAGCAGCAACAAAAGGTAGATCAGAGTGACATTTACATATCGTAAGGCACGCGTTTTGTACAGATCCGAAGGCCAACCGAGGCGTTGCAAC[C/T]GCTTGACAGGGGTACGCATGTAAGTAACGAGTCCAGGGTTTTGACAGATGCAATCTCCTCCGGTTTAGTCCCTTGAGGAGGTGTCCAAACAAAATGGT    | C/T |
| 2 | PERL_400707_Ler  | TTTCAAGACTCGGATTTTTATCTATATTTAGAATTTTATAGAAGGTATGGCTTATGAACTATTTAATGATCGGAAGAAATTTGAGACTCAATACCGAAGTTC[G/A]AAGACGAGTGGACAAAACAGCAAGATGTTCCGGATGTATTGCTTGATGAACTCAGGAGGTAATGATCAGAGTACATGAAGCTGCAATGACTCATGCC     | G/A |
| 2 | PERL_402952_Ler  | CGTCGCTTCCATCGCAGCAATCTGAGAAACAGACAATGTCATGCTGCTTATCCAATCCAACAAAACATGTAGATTACTAGCATAACAGCAAGAGACAGCT[G/T]AACGAGAATCATTTAGTCGAATTCAGAACATTAGTAACTACTGACCACAGATTCGATCATTACACGAGAAGAGTAAACGAACTTTGGAGAACTTCCAA      | G/T |
| 2 | CER425424        | TATGCCAGGGATGGTGGGGAGACCCCAAGTTACCGCTCCAGGAGCTGCTTCTCCTCCTCCCCACAAGTTGCTGCTCCAGAGGCTGCTTCTCTCCAA[C/T]TGGAAACCAACACAGCCAATACAACCTGACTTTTTGTTAATGAATCACCTTCTCAGAAAGTTGAGACTTTCGATGAATTTGATCCACGCAGTGCCTTTTCA       | C/T |
| 2 | PERL_407406_Ler  | GAAATCTTGTACAACGGTGATGTTGTTGGTGAATGAGGATTAATGGACAACGAGTGGCTTCATTTGGTGACTTAAGAACAGAGGTTAGTGCAGAAGTGG[C/G]TTACAGAGGGAATCAGAAATCACCTGTTTGGTTGAAGAATGATATAGAGAGAAGGCTAATAATCCTCGAGACCAGAGCTAAACTAAGAGGTGAAGTGCAC     | C/G |
| 2 | PERL_409455_Ler  | GGTGATGGAGGAGGCATCAAGTCTAAGGGAAAAAGAAAGGAGGCAAAAATAAGAATAAAGGAAAGAAAGGAGGTTGGCAAGAAGAGAGGCAAGTAAT[C/T]GCGGTAGCTCTGTACAAGTTTTGAAGCGTTTCAAGTATCATTGTACTTCAACAGGATTACTCTTGAATTAACATTACAGTGAAGAGCTATGAGT             | C/T |
| 2 | PERL_410860_Ler  | AGATGATTTTGTTTTTATTTTTATCACAAGGGTTTTGAGCAATTTAAACAACACAGAGGAAAGTATTACAATGGCTAATTAATGGTCTGTTTTCTTTACGGGAA[T/C]GGCATATAACGTGTTGGTCTGTGTAATGTGATACCAAAGGTCTCGTCCATATCCAAGTCTCTGAAACGACACCGTTAGGAAGCTTCCAGTCAAAGGAA  | T/C |
| 2 | PERL_412300_Ler  | GTTAAAGCTATTTAATAACCCAAAAGACTTCGAAGAATATATGAGATTAGCCCCCTTTTTTCATTTTCTTAAAAGATTTGTATAAGATCTGCAGTGC[G/A]AAGGTGAGATACGTCTATATTTCTATAAGATGAATAGTCTGCTAGCTACTTTTTTGTGTTGGTACATGTTATGATAAATGAAAACGTTTAACTATG           | G/A |
| 2 | PERL_414078_Ler  | TTCTTTTTATCTACTGGGCTTTTTAGTTATTGTCAGATTACTGAAAACCTTTTTCTTACTTACTGGGCTTTTTAACTAGCTAGTACGGCGGAAT[A/C]GTGAAACCCGACAAGCCAATTTATCTAAGATTTTGGATTTTGGCAATTTGCCACCAACTTATCGTGAACCCGACAAGCCAATATACACACTCAGCCAAT           | A/C |
| 2 | CER448159        | TCCCCAGCGCCGACGAGATCGGAGAGCGGTCTCATTGGTCAAGCTCGTCCGCTTGGAGCTTGAAGAGCCAGCAGCTCTGCGTCTAGCTCACTCAG[C/A]ACTTCCAGAGCCGTTCTGGTGTCCGGAGACCGATCTCGCCGGGCTGAGGGGAGAGTGCTGTGGATCCTCCCGAAGCTGAGCTGGCGGCTGATCTCGT            | C/A |
| 2 | *PERL_416019_Ler | AACGCAAGCCTCAGATGGAGACATCCATCATGAGATTTCTCCACGGGAGATGGTGTACTATTGACCATGTCCCCTGAGAGCTTAGCAGACACTTCAAA[G/A]AATTTAGATTCTCAACTGCAAAAGTATCATGACTAGAATGATACAGAAGGGCTGTCTGTGCTGTGACTGACCACAGTGTCTTGGTGTATCT               | G/A |
| 3 | *PERL_416091_Ler | GAACTTCAAAAATTTTTGAGTAGATCAATTCGCACAATGTTACTCACCAATCCGTAGAGTTGACTTGTCTGTTGACTAATGATAGAGAAGGAGAATGGGCTTAACATGAACCTGTGTTCAACTCTTTGACTGATCATACTACTTGTCAATTTTGTCTTGTGTTGACTAATGATAGAGAAGGAGAATGGG                    | G/C |
| 3 | PERL_416091_Ler  | TCCTAGTCTAGTAAATATTGGTTGAGAGACCTGATAAGTGAACATTTGATGTTGATACCAATTTGGACTTTTGACATAATGACAACATACTTTGGTAAATTAT[C/T]GTCTTCGGCCAAGATCATTAAAAATGAATCAACGTTTTAGGAAACGTGATAAGTATACTTGAAGGGCTGGCTTAAAGCGCAACAAATCCAAAAAATA    | C/T |
| 3 | PERL_420280_Ler  | GATACAAGCAACAGCGGCAGCTACGATCTGAACTTTGAGGATTTGATATCTCAAGCTGACCCGAGACTGACACTGACATAAAGCTCTTCTGCAGAGGA[G/A]C GCGATGGAGCTGAAGCTACAATCGCCACTACATCTTCAATTTGAGGAGAATCCCAAACTATCACAATAGAAAAGAAATGTGAGCAGCAAAAATGCAAA      | G/A |
| 3 | PERL_422425_Ler  | AACCTGACAGCTCTTTTGAATTTAATTATGTTGCTTGTCAACTAATTCAAATGGATCTTGATTCCAAAATAATGTTACTAAGAAAATATTTACGCTAG[G/C]CCAATTTGGTTGTGGATTTACGATATTTGGGCTGGGCCAACGAAAAGAGCATGTGGCCATATTTGATCAAGTATTGTAACCTTTCATTAGCCGTATGT        | G/C |

|   |                        |                                                                                                                                                                                                                      |     |
|---|------------------------|----------------------------------------------------------------------------------------------------------------------------------------------------------------------------------------------------------------------|-----|
| 3 | CER473550              | GGATCCTCTGTGTAGGATTATCGTTCACTTACCAGCTTTATATCTGCTGGACGCTACTGGATTTTATTCTCTTGGGCTACAAGCTCTTGGGATTCAAGT[T/A]TGT<br>AGAGCTACAGGGCAAGAAGCTGGTATTAACCTTCTCCTTTCTGGTTGAAATTTTCGTGTCAACCATTATCTTACTATGCACCCCATAGAATTAGGGCGCT  | T/A |
| 3 | CER468485              | AGTTAAACCGTTAGACCAAAACGACGTTTTGGTACCAAGAAATAAAATCGCAGTTTTTTTTGGTTAAAGCTTGATGAAACACGAGACTTTGGTTCTGT[A/G]TTGT<br>ACAGAGTTTTGTTACTTTTCAACGCTCCATATAGTTTTTTTTGGAAAAAATAATGATTTTATCCAAAAATAAAATGTA AAAACACTAAAA           | A/G |
| 3 | PERL_429038_Ler        | TTGAGGCTTTTTCTGGTTCATATACTCTTACTTTTTACTGCCAATTATTACCCAAAATATTCCCTTTAATTTAATTAATGTTGTATGTCTAGTGTCTC[T/C]TAGTGG<br>TGCCCTGCATAACTCATGATTTGTGAATGTGTCGGTCTACAAGATTTCGATCACCACAAAATAAAATAACAATCACTACAATACATAGAAAAAAG     | T/C |
| 3 | PERL_431508_Ler        | ACAAAAATTATAAAATAAAAAGTGACAAGAAATGAAAAGAAAATAAAGCTGCATCGCCGTTTCAAATCCAATATTGCAAACGTTATCCAAGTCTGTCCGGC[T/C]GAAA<br>TACCGGCAACTAACCATACTCTGATATGTTCCCTACTCATAAATGCTAACATGCTTAAAGTGCATAATTTTGGTTTTGTTTTGGATTTTACTGAT    | T/C |
| 3 | PERL_433766_Ler        | TATAACTTGTACTGAGAGTGCAAAAAGAGAATAATTGCATGAAGAACCCTAATGGAGTTGGATTAGATGGATCATGAAACTTGGGTTTTATTGTTTTCTAGGC[C/T]CAC<br>GTTTTCTACGCAATTAGTTAGATTTTACATGCATATTGATAACAAGTGATTATCATCTCATATATTAACGTAACACAGAGATGATGGTTGGAGAA   | C/T |
| 3 | PERL_435300_Ler        | CTGTTAATCTGCAGTGTGTCAAGTGCAGAGGTAGAGGTTTCCGTAATGGTCCCTACAGTCCGATTTCCCTTTGTCCCTGGTCTCCCGGTGGCTATACCGTG[T/C]GA<br>GATCACACTGCTTAATGTGCCAAGAGATACTGTTTATGGTGTGAGAATACAAGAACGATGAAACTTGGCAATTTGTGTACTTGGATCCAAACCTCT     | T/C |
| 3 | PERL_437189_Ler        | GTATTCACACATCAATCAACTACTAGTTTTCTGAATAATTTTTAAAAAACCCTAGAATCAAAAACCTCATGATTTTATAAAAACAGAGTATGCC[T/G]GATTGT<br>GCTCCTCCAGGAAGGGAGAAGTTTTGGTTAGTTATGTCTTCAAGAACCGCTTGAAGTTCAGCTTTCGCTGTCTTAAACAGATATTTTCGGTAGGCC        | T/G |
| 3 | PERL_439306_Ler        | ATATGGAAGTCAATAAGCGGTAACAGAGGATGCTACTTTAGAATAACAGAACGAACTATCCAATAAAAAGGAAAGACTAACAGATATTAGAAACCTGTGA[A/G]TA<br>GTTTTGAATGGCCTTGTGAAACCACCATGATAAGCATGGACAACCTCATCAACAACCTCCTCGACAACATCACTTTGTCCCTTAAATATATGAATGT     | A/G |
| 3 | PERL_442052_Ler        | TATTATAATATAGAGATTATAGATAATTGTATAGATATTGACGTTAAAAGAAATATGTATATATTACATGGAACATCATAGGGAATTGAATGTTAGTGG[A/G]CATT<br>CGATGTGAGACCGCTTCAACTTTTTGACTACGATAAGAACAACAATCTCGCTGTCTGAGAAGCTATATACA AAATGAAACAACCTCCAATGTA       | A/G |
| 3 | CER477518              | TATTCGGACAAACAGCTCAAGTTTTCTGAGGCTTGTCTGAAAAGCCGAGTTCAAATGCGGAAATGAGGTTTTCAAGAACATGTTAAATGAGACGATGC[T/C]AAAT<br>TACAGAGGAATGTTGTCGTGATATATTGAAGATGGGCAAGATTGCCATCTAGGATTGGTTAAACTCATATTTGCCACATATGAGTATAAAAATATT      | T/C |
| 3 | CER437449              | CAGACGGTCCCTTGTGCTCTACGCTCTAAGATGATTTCCCGCATCTGACAAGGGCAGGTTCTTTGCCCTCGGTCTGTCTTTTCTGGTACGGTTTTCTAC[T/A]GG<br>TATGAAAGTCAGGATCATGGGCTCAACTATGTCCCTGGTGAAAAGAAAGATCTGTATGCAAAAGTGTGCAGAGGACTGTCATTTGGATGGGTAAGA       | T/A |
| 3 | PERL_448757_Ler        | ACCTGAGGATTAATGGACGGTGTGGTTTTACAAAATCAATATGGGCTAAGATTTATTATAAAATGGGCTTACAAAAGCACAATGTTATGTTATCCTCCAA[A/C]TTCCG<br>GGCCTCTAACACTTGTACACAACCTACACATGATATGAATACAAGCATATCTTCGTTTACATTTATTGCATCATTGCATATGTGTACACAATAAGT   | A/C |
| 3 | PERL_450708_Ler        | ATCTAGCCGATAAAGAGATAACTTAGAGAAGTGTGACATGTTTTGCTTCTATCTTACATGATAGTTTGTGATGCCGTCAATTTGATTTATGTGATGGGCTGT[G/G]ACCT<br>GGGCCAATTCTTGATTAGGCCTGCATTA AAAATATTCTGCCAACGGCTAGAAACTTTTTCTCTTCTTATAAATTTACTTTTTTGGCCTAATCCC   | T/G |
| 3 | PERL_452986_Ler        | ACGTGTCTTTTCTATCTCACTCATACCCGGACGGACCGGTTCTCGCGTACGTACGCAATAACAGCTTCCAAGTAGTTTCATTTCCCAACCCAAACCGTGT[G/A]AT<br>TTTTGCGTTCTGTCTGAACATCTTATCCCTGACATACCCGAGAACACCCCTACTCTCTTTTCGACGTTTTCTTTGGAGTAAAGTAGCAATGTCTGGTATAA | G/A |
| 3 | PERL_454858_Ler        | GAGAATCAAACCTTTCTTTTAGTTAAAAATGAAATACAAAACCAATAAGTAACCATCAAAACATCGCAAGCTTACCAAATTTCTCAAACCTCAACCCGTGT[G/A]CGTA<br>AATAATACAATAACTCTCAAATAGAATACACAATAGACTAAATGATTAATCTCCCTAATCAAAATCTACGCAACTATCTTTAAGCTCTCCATGCA    | G/A |
| 3 | PERL_457971_Ler        | CACTTTGGGCTCCACGACTGGAGTAAAGTAGTTAATGCGGTATGAGACGAACAGTTTCTGTCAAGGCTAATTCGGCTGCGTTCTTATAGCCATGGTTC[G/T]CT<br>CCCTAACCCGGACACTCCCAATTAATCTTTGGACTCGTTTCTCCACCTCTGTAGAGCTCACGAAACCCGCTCTGATTCATTCATCGAAATCGCAATC       | G/T |
| 3 | PERL_460787_Ler        | TAGGGTTTTACTTCCACGCTTTCAACTTTTTATATTGTGACGGCTCAGTCAAATAAGTTACTCGCTCTGTTTTTTCGGGCCGAGAAGACTCTGGCCTC[G/A]ACC<br>CGTAACCTCCTAGATAACCCAACCTCAAACCTCTCCTTTGCAAATATCATTTCATCCGCGCCAACCACAAGTATAACATGATGAAAAGGAACGTTTTT     | G/A |
| 3 | CER439712              | TCCTCTGCTTCCGGTGGTTACAAATTTGAAGACAAAAGAACCCACCCTAACTGAATTGGGCCAATCATGGGCTTTAGAAATCTAATAGGCTTGTAAATGTG[G/C]CC<br>GGTGAAAAGAGATAAGAGTGATATATTATAGGGATGAATTTGGAAGATTGAACCTCAATAAGACCAATCGGAAGATCACGAAGGTAAGTGAATCAAAA   | G/C |
| 3 | PERL_466437_Ler        | ACGTGTTATAAATTTGATCATTAGTTGCAACCTATGGAAGTTAGTTGTAGTATGTCAGACGTAATCAACTGATCAGAACCAGTTTGAAGGCTCA[C/T]GAA<br>GATTTGGTCTGCAATAGCTGTTATAATAGATATCACTTTCGAAAAAGAGACTGACATTTGTTTTGAAAGCATGTTTAGATCTTATAGGTTGATCTT           | C/T |
| 3 | PERL_468933_Ler        | TACGTATAACGCCTGAATAAATCTTTCAGACCTGCGTGCAGCGTTTCGCTGCCGCCGAAATTTCCGATCAACCTTAATAAGGAATATGACGTCTCTGTCCG[T/C]AA<br>ATGATCGGAAGGATTTGTAGATGGGCAGATGAAGTACTGGCGTCAAATAGCCGAATCCGATGTACGTTCTTCTTTCATTTTTATGATCTAATTTTCGT   | T/C |
| 3 | PERL_471183_Ler        | TCGAAATTTATTAGTTTTCTTCTCCTTCTTTGGGACCCACAAGAGACGAGACGCGCTTATCGGCATCGTCTGCTCCTCCGTGTTAAAAGTAAATGC[C/T]GTG<br>TTGAGGATACGCATTAATGTGGAGAAAACAACATTTTTGTTCTATAAAAAAGTGAATTTATGCTCTCCATTAACCCCAATCTCAGAACACAAAACG         | C/T |
| 3 | PERL_473449_Ler        | TCCTTCTCCGATTTTCGTTCTCAGCCTTCGCATTTCTTTTTTAATTTCTGTTTCGAAACGCTTTCAAGGTTACGTCGATCTCAAAGTAAACATCGCCTTC[A/G]GAGA<br>GAAATTGATAAACCTTGTCCAAATTCATTGTTATTCATGGCTCTTAGAAACTTTACCTAGATTACTCGGATTCAATCGTCAAGTTTTATATTGGAT    | A/G |
| 3 | (1)<br>PERL_476047_Ler | GGGCTCACACGATTGGCGTCTCACATTGTTCTTCCATGAATACGCGTCTCTACAACCTTCTGACTACAGTAAAACAAGATCCATCTCTCGATAGCCAGTA[T/C]GCA<br>GCAAACTAAAGGCTAACAAATGTAAGAGCCTTAACGACAATACCCATCCCTCGAGATGGATCCCCGATGAGCAGAAGCTTCGATCTCAGTTATT       | T/C |
| 3 | PERL_478227_Ler        | AATTAACCCTGTTCTAGCACAATACTACAACATTAATTTGAAGGTGGCTAGATTACACCAAACATTCGTTCTATTGTGCAAAGTCAACGGTT[A/T]GGA<br>GAGTTCTTAAGATCGCATTAGCTATGAACTTTTATTGTTTTGTGTCAGGAAAAAAGAAAACTAGCAAATGTTAATTACATTTAAGAGATATAAT               | A/T |
| 3 | CER434254              | TGTGTTAAATATATATATTTTTTGCATATTTATTGTTGCATATTGTGTTGCATATTTAGTAATGGTTACATTTCCCTGTTATCGGAGATCCAAGATAAT[A/G]CGGCT<br>CTTGTGGCATGGACTACTACTCCATGGATTCTTCCAAGTAATCTTGTCTTGTGTGCAATGCAAAGTTTGTCTATCTTAAGGTTTCGTCAACAACA     | A/G |





|   |                        |                                                                                                                                                                                                                  |     |
|---|------------------------|------------------------------------------------------------------------------------------------------------------------------------------------------------------------------------------------------------------|-----|
| 3 | CER477021              | TCCTCCACCAATTTATTTCCATCGAAGTCACTACACTTTACACTAATAGTGATATTTCTGTTGGGACCTGATCTTCATAGGAAGTGCCTAGTTCTAGATC[C/T]GATGCGATGAATGATTAAACTCTTGGTGAAGCAATTTCTGAACGCACATAAAATACCTGAATGCGTTGTTGTTCTTGGGATAGTATGTGATAACATGTTT    | C/T |
| 3 | PERL_597178_Ler        | ATCCTCCACTGGCTTGTCTCCGGTGTGCGGTCTATGACCCATTGCACCATAGGCTTAAAAACAAGAAAGCAGCAGAAAAAAGATGATCACCGGACA[G/A]TGTACAGATAGGCTGTTGCATGTGAAACATGAATGTAGGTCGTTGTATAGAGGCAACTATCATGGAATAATCCCAAGATGTCGTTGATGACACATGC           | G/A |
| 3 | (1)<br>PERL_600735_Ler | ATGCAAAAAGATTTGACCGCATTTGAAGCAACATCTCCTAACTTCATCTTCTTTAGTTGATATAGAGAGCTCGGTTTCTGACATTAAGCCGAGCATCGCG[A/G]GTTGGGCAGTAAATTCCTCTGTTACAGGGATTAAGTCTTCTTTAATCCTTTGTTGCCACATCTCTCTTATTTTAGGTGTCAAAGATTTATACAGCCT       | A/G |
| 3 | CER478878              | GTCGAATCTTTCTGTGTGATAAGCTCTCTTCGAAGTTACTTACTTCGTCCAAAGAGATTCTCGCAAGCGTAGGCGGTAACCTGGCTCAGACATTTACCA[C/G]JACGGCAAGATCTTACCAGAGTCTCTAGCTACAAATTCGGTCACTCGTGGTCGTCATTGGTTCGTCCTATTCAATCCTTTTGACTACCAAACT            | C/G |
| 3 | PERL_609298_Ler        | TAATTCGTTTTGTTCTCCATAGTAGATATTTGCTTCTTTTGCCTTATATACTCAAGTTCAGACTTTGTAATCTGAGGATGTCGATCTGGTGCCTTGACGT[T/C]GCAGAGAGCCACACGAGCAACCAAGGAACCCCGATAGTCCAAAATTAACAATGGCCATATATACCTCCTTGAGACATAAGAATAGGAGACAACATGA       | T/C |
| 3 | PERL_612997_Ler        | GGGATGGGAACCCGCCTAAAAAGCGAGTTTCGAGTGTATCCCTCGCTGTGCCTTCAGGAGAATGCTTTGGCATGTTAGGGCCCAATGGTGCCTGGCAAGAC[C/T]TCTTTTATCAATATGGTCAGTACACAAATCTACCCCTAAAAATAAATAGTTGTGCTTACTGATGACTGAAAAACTCCCTGGATAATAAAAGTTGCA       | C/T |
| 3 | PERL_615911_Ler        | GTTTTACCGATAGCTTGTATCAATTTCCAAATTCGAATCTCGAGTCCGAGCTATAGAAAAGTTTATATAGACTGTAACCGAGGAATTTGAATCGT[T/A]ATCGAACAAATCCCTTGTTCGGTTCTTGAAGATCGATCACTACCGATTCCGATCTGGGCGATTAGATTTGATGACAAAAATACGGTGTGTGTCTTCT            | T/A |
| 3 | PERL_618967_Ler        | TGCTTCTCTGTTTCTCCGTCGAGTCTCCCGGAGATTTATAGAATCCAATCGCCTCAAATCGAATCGCTAATCTAGTTGAATCAAGATGGTTTATATCGC[A/T]TCGTGGGACGAATTCGTTGATCGATCTGTTCAAGCTTTTTCGAGCTGATCCGGAATCTGTAGGTTAACTATTTTTTGTCTCCTCTTTTCGATTTACATAT     | A/T |
| 3 | PERL_624470_Ler        | TTTTTCCACACCGATAGGTGATGTTGCATCAGATAATCTCATTCTTGAAGTTACAGATAATCTCATTCTTGAAGTTACTTATCAATTTGGAGCATGCCAT[C/T]GCTACTGATGCCTTTAAATACAGAGTCCACTCTGATGTTTGTGTAATGGAACCCAAATGGGCTGGCAAAGTTGTTCAAGGCTACCGTCTCTC            | C/T |
| 3 | PERL_626784_Ler        | AGACGAGGTACGTAGCTAGTCTAAGAAGATGTGATGATCAAGCCTTCGTTCTTGGAAATTTGGGAGAAAGATGGAGGCAGTGAATGAAATGAAGGTGCTG[T/C]JACAAGAGGATTTCCGGTCTCCTTGGTGGAGACCCTACGTACCACATTGACTCTATGGTCCACCTTCTATCGGCTGCACCTACGACCACGATGAACATT     | T/C |
| 3 | PERL_628544_Ler        | TACTAGAAACCCTAAATAGCTAAACCACGCAATTCCTGAGGAAGATTCATGTAACGAGAGATACGCATCGAGAGGAGAGAAAAATCGCAGGACGAAA[G/A]JCATACTTGGGTCCCTTCGTCCTCGTGAGCCAGAGGATCGACGCCGAGGATGACTTTGGCGTCAGGACGGTACGGATCGTCAGGACGGTACCGGATCGTCAAG    | G/A |
| 3 | PERL_630835_Ler        | AATTTGATTGTTTTTGTGGTACAGCTATGGCGGATACGGTAGAGAAAGTTCCACCCTTGTGGAGTCACTTTCATCATCCACCCTTGAAGCATTA[A/C]TAGCGCCGAGAAGACTGAGCCCACGACGGAGAAAGAAAGTGGGGCGATGTTGAAGATGATGATGATGAAGAAGAAGCTGTATCGGAGCTTAATTCATTG           | A/C |
| 3 | PERL_633276_Ler        | GAAAAACAAAACCTGTTGCTTCGAGAGCACAGTCCAGGTAATTTCCCTTATTAAGCACCAGAATTTGATGCCTCTTAGTGTGTTGATCATTGGGACTTGC[A/G]JACGAACATATGATTGTAGCTTGTATTGTCACTGAACTGTATTGGCGATGTAACCTTAGATTTGCTCATTTCGTATAGTCTTTTTCGACAGAGTTTTAAACAC | A/G |
| 3 | CER476104              | AACTGGCAGACACGTTAATCTTCAGTTTCTCAAACCCATTTCCAGTTTCAAGAGATGATCTTGAAGTTAACTGCTGCTCCGTAAGAAAAACGAAAACT[C/T]TCGGTGGCGTTAAAGTCTTGAGAACCATATTATTAGCCATGGATGAAGCATCACACCATTACTGATGACAAGAGTTAGTAGCAAGGTTGATCCTCTC         | C/T |
| 3 | PERL_637620_Ler        | ATTTGGGATCATTGACACATTTGATTTCGAAGCATGCGCCGAGCTTTGACCCTGTTAAACAACGATGTGCTCAGCGCCGCGCTGTTTGTCCGTATCC[T/C]JTGCTATACAGATTCGGTATCCACACGCGCCACCTAAAATAACAACAACAAAAACAAAAGTAAATTAAGGAACAAGAAACAGAGCACTCTGTTTTAGA         | T/C |
| 3 | CER476418              | CTCAGATGAATCATCCCAAGATTCGAGCGCCGGGTAACAATGGAAGCTCCTCGCTCCGTCGGAGGAAGAATACAGAGGAAACCGCTCGCGGATTGTAC[T/C]JACACCCGTCCTCAGATCTTCTCAACAGTCACTTCTTCTGTAATAATCGCGAATCCGAGTCTCACTTCTTCACTAAAGAGATTAGTAGAACAAACTACGC      | T/C |
| 3 | PERL_642202_Ler        | TTTCCGCTCCTCTGAATTCATCTCAGGGACATAAGGTAGGGATGCAAAAAGCCGGGAGTGTACATACATCTTAGCCTTTGCAGACAATATCCGCCAATTT[C/T]JCAATATTCCAAGAGTTGTTCCAGGAAGTGGAGCTTCCGTGAGCCTCGTGACCTTTGCACCATCTTCTTGGATAAGGCATTAATCAAAGTAGATTTCCC     | T/C |
| 3 | PERL_644299_Ler        | TGCAGAGGTTGTAGATTAGATATGAGCGAGGTAGCTGCTTGGCCAAATAAGCCTTTCTTAGATTAGCGTTGAGATGCATTGGATGCAAGTTGGGAGAC[C/T]JCGTTGAGTAGCATGATTCAAGTGACGAAAGAGCTCAGGCTGATTGAGAAAATCTGCATATTATCCATAACAACACAGATCACAGATGAGCTCCATATGACA    | C/T |
| 3 | PERL_646360_Ler        | TGAGTGTGTTTTGAGTAGATTAATGTTTTATTTCTATCGTAGTTCTTATTACATTTTTGAGCCATTTTCATATCTTACTACTTCTGAAACAT[T/C]JGAACGTGTGAATGTGGGTTGATGGTTTTGTGGAGGAAACATACTACTGTTCCACCTTTTAAAGTTTTTAAAGGTTTTCTTTCTAAACAAGACTATTAT             | T/C |
| 3 | PERL_648257_Ler        | AGTATGCAATAGAGAAAGTCTCGAAAGTGTGGAAGGTTGAAGATAAAGAGAATACAGAGAGGTAACGGAAAAATAACGACTGCTTTTTCTCAAATGA[T/C]JGACGTTACAATCATCTCCATTACGACGTTTTACTCTTTTTTCAGTAACTTTTCTGTAGTTTGTGGCATCACATAGCAATGAACATTTTATGAAATCT         | T/C |
| 3 | CER477934              | TAGATTGACTAGTTTTGATAATCAATCTTCAGATGATAATACTTAGCCAGAAGTGTAAATTTGGATATTTCCAAATGAAAAGTGTGAGGCTTTAAAG[A/G]JGGCAAGCGTGACCAGAATCCATCACACCATGTGGCCATCTAAAGATAAGATCAACTAACGCATTCACTCCAGCTGAGCAATCGCTCTCTAAT              | A/G |
| 3 | CER482305              | TTTGTACACTGGTTTTAGGAGTATTGGACCTGCCATGTTTGAAGGAGAGGCTTGGTCTTAGGCTATGATGAAACCAGAACAATCCGTGTTCCAAA[T/G]JCCACACAAAGCAAGTTAATCTTCTTTCTTTCTTTGGCGTATATACATTATTTTTGTTGATCTCTAATCATAGATTCTGTTAAAAAGTGTTA                 | T/G |
| 3 | CER478092              | TGTTTCTTTACTTTCTTTGTTCTTATTTTATTCTTTGCTTTAAATTCACACTAATTTCTCTTTCGTTTAGTTACCCTGTATCTGTGTATAGCCTTA[G/C]JCCATTATCATACTAAAACCTGCGCTGGGCGTAATTTAGCAGCAAGAGGATTAGGCATCTCACACGAGAGCCTCAGTTTCTCGGACAAGTCAACGGCTCT        | G/C |
| 3 | PERL_656311_Ler        | GATGGGTTACAGGGTACACCACTTGAAGAAAGTTGAGAATGGATCTTGTGGAGCTGCTTTCACATTTGAATTTACATCTTCTGTCTCTCAC[T/A]JAGGCAAAGTAGGCGATCCGGTCTGGTTCGAGTTCCATTTTTGATACTCATGAATGCAACTTTAGCAGCGCTCATTTCAGCCAACTTTTGGTTTTCGCC              | T/A |
| 3 | *PERL_657590_Ler       | TTCTGCATTCTGGAATTTGGGGCAATCATTTGTGCTCTTGTGACCAATTTGACAGATTGGTGACCTTAAGGGGTTTTTCGGATTGCTAATGGTCAAT[G/A]JTCCAACAGCTGAGAACGAAGCTCAAATATTGGACAACACTTATGAAATGGAAGTGGTAACTACTTCTACTTTTTCTATTCTCTCTGTTCTAC              | G/A |

|   |        |                                                                                                                                                                                                                     |     |
|---|--------|---------------------------------------------------------------------------------------------------------------------------------------------------------------------------------------------------------------------|-----|
| 4 | 131    | CTGAATGTTTTCCGGATCTGCTGAGTCATAAATACGAGTGCTTTAGGCAGGCAAATAAGACTCCAGCATCAATTTGGCTGGGGAAGGTGTTAAAATCTC[T/A]ACG<br>ATCAGGTACGTGATTTCCATTCCCTTCTCTGCCTTGTCTTTAAACATCTCCGTGTACACTTTCCCTGCTCCTTGAGGCC                      | T/A |
| 4 | 130n   | GTGCTTTCAAAGAAGGCGTTAGACTATATATATATGTTTTCTTCAGTGTAGGGTGTGCAATGAGCTAGGATCCGAGCTGCGAAATACTC[C/G]G<br>TGATCGTAACGGTGATAGAGTCTCTCGTATTGGAGTAGTGTGTGCAATTTGTAATTTCTGATAACACGAGATGACTTTTGTGTGATTTTTACGGAGAGT              | C/G |
| 4 | 128ac  | CAATGAAACAGCAGAGATAATCAAATTCATACAAAAACATAAGCATTTACTAGAATATCTAAAACATAAGATCTCAAAAGCTTAAATTTGACTTGTAACA[T/A]ACTAT<br>AAACGACATCAATCCGTAATTTCTGGATGAGAATGAGAGAAAAATTTCAACAATCAGAAATATAAAATCAATCTGATCTTGAACGAGAGACATT    | T/A |
| 4 | 128    | TAAAAATCTAACTGTATTAACCTTTATATTTAACTATATAAACCTCTTGAATATATTATATCATGTGCATGTTATGGACTAAACTTTTTATTATTGTTG[T/C]AGCGTTAT<br>TGGATCTGTGGTGGTGTGATCGGTTTATATATATTTCTATGGAGTAGGAGTAAGCAATAGTAGAGTGAAGATCATGAAGTTGCCTACC        | T/C |
| 4 | 127    | CCAGTCCGTGGTTCGTAACACTGACAATCAATGTACTTCTCAATATGGATGCTAGATACTTGTCTTACAAAAGCTTACACATTTAGTTACATCCCAAAAG[C/G]CTATG<br>CTTCCATCTGTGGCCCACTGATGAGCAGATAAACATCACTATATGNTGTATTACCTGTCAGGTAAGTTATCAAAACTATTACGACAAGAAGA      | C/G |
| 4 | 126ter | GAGCTCATTTTTAACATTTGTTTCGTACCAATCTGGGATTTGTAATTAGCTGAGTATTGAGCTCTAAATCTTGAAAAATTAGTGAGTTTAGTATTTTGC[G/A]AAAGAC<br>CCATTAACAGATTAGATTTGTGCGTTGTTCTTGCCAAACTTTTGAGAGGTTTATGAAACAGAGTAAACCCCTAGAATTCAATTCCTTTG         | G/A |
| 4 | 125    | GTCTNTTCTTACAAGAAGTGGATTAATGTTGAGACTGAAATGGCTTGAATCTGGATGAACCTTTACCAGCAGAGATAGTCTAAGACTCTAAGAGGGT[C/A/T]GTAA<br>AACTTCTCTTCCCTTTTTCCATTTCAAAAAACAGGAANCGAGGCTAAGAGGAAGATCACTTAGCAGGAGAGTAGTTAGATTTACATCCTTTAAGG     | A/T |
| 4 | 123    | GGTTTAGTGGTAAAGGATATGTTTGTCTTAGTGCCTTTTCTTATGAGGATTAGGAGAATTTTTGGTTAATTCGTATTTGACATCAACGTATATTGAGTATGGA<br>C[A/G]TACTGTATATAGGTTCCACCCGTCTCTTCTTATACTCGCAAGCATTAGCACACAGTTTTGAGTTCATCGCTACTAGTACAGTTTCATAATGATATTAT | A/G |
| 4 | 103    | CAAAACCATCAATCATCGCGTACGAGCACGAAAGCAGCTAAAACCCGAAAACCTAAAGCTATTTTACCTCAAGCAAAAGCCAATGAAATTCACACTATAT[G/A]TCAC<br>CAATCAGAGCCTATAATTTCCATTACTACTTAGAATGTCACAACAAAAAAGAAATCAAGTAAAACCTTATCAAACCTCTAGCTAATCATTCT       | G/A |
| 4 | 102    | CCCCAAAAGAATCCTTAAACCGTCGCAATCGTTACTTTGCGACTAATGTGAGACGATACATGTTAGTCGCTATAAAACGGTCGCTAATTAACCGGTC[A/G]CTA<br>TTGCGTCGTCATTTGTGACGCCTTTGAGACATATATTCGGTTCGATATAAGCGACAGTTTTGCGACAGTGGTTAATTGTCGTATATTTACGAC          | A/G |
| 4 | 101    | GGCAAAAGACTCACCGAGACATCTCGAATGACGCCACTTTCGCTGTTGTGTACGGTAACCAAAATATCAGGCATGAACCGCACTTCAACATCCTCATCT[G/A]TGG<br>CAAATACGAAAAGCTAAGAAAATAGCCATAGATGTGAAACATCTTGCATGAAACGTTGACGAACATAAAGGAGATGCATGGAATCAACAATAC        | G/A |
| 4 | 99     | TCAAGTAGGATTGATTACGGAACGGGACACGAAACATTTCCGCGCGTGGTTGATTGTTTAGCTAGGATGGGGATAGTGAAGAAGAGGATTATCAT[A/G]GTT<br>TGGTTGCTAGGGTTTTGTTAAGTATTTGGAGTTGATGAGGAAATGCAAAATGGTTTTATTGTTTGAACCAGCTGGATCTCATGGAGTTTGGGGAC          | A/G |
| 4 | 98     | GGAGTTCAAAACATAGNAGGGATGATAAGCTNTGGAACGACTCCCATGCCTTACCATNTACTCTGCTACACCTAATCTTGGACTCGCATCCACGCTT[T/C]GAG<br>TTCATCTCGCAATCACAAAATATTTTGTCAAGGATCTGGNTNCTACATATTTAGTATTGTTNTCGTTCCTCGCTTTCGAGTTANACCAAGCTAACC       | T/C |
| 4 | 94     | TCGTATAAGATAAGTTTGGCTAGACCGGCTTTGAAGTTCAATGAAGAGGCTGTTCTTGTCTTATACTCAGGTGAGTCACCATCTCATCACATGATTC[T/C]CACT<br>GCAATTCCTCTCGCTTTCGTTTAAACGCTGATATTTATGTTCCAGGAGATGTGAAATCTGCAACCGGCTTCAAACATACTTGTATCAAGG            | T/C |
| 4 | 91     | CAAGACTCAGATGCAATCTGTGGTTAAGAAGATGAAGCATTCCCCTGCATCAGCTTATAAAAGATTGACCGAGCAGAACATCATGAGTTGTCAGAGAGC[T/A]TAC<br>GTTACACCCTCAAAGATCTATCTGTTGGGTCCAGAGCTTGAGACTGCAAAATATGTTGTGAAGAATTTGCAGAGCATGTCTCGGATTTTCATGAGA     | T/A |
| 4 | 88     | CTTGTTGTTTAGTAACGAAACGCTGGATTCCACGGAGTTCCACGGTATGGTGAGTTTTACCGCCACGACAAGTCCGGAGACAGACAGGTGATGCCGTT[G/A]CC<br>GGATGAAGATGTGTTAGGTTTGAACGTGAAAATGCCGGTAAATGCTTCATTTAAATCCAAGAGATTCCTTCCACCAACGAGTCTTTGTGATGGAAA       | G/A |
| 4 | 86     | TATCTAAACTAGCCAGAATATTGTGCAAGCAACAGTAACATATCTCAAAAATAGTTAAAAATCAACAACAGAGGAGCTCAAGAATTAAGCAGTTTCCCTTTC[A/T]AAT<br>CCTTTCGACATAGAATCTAATGAAGCCTCAAACCAAAAGAACATCAACATAACCAAACTGTAAGCTATAAAACCACTTAAATGGACTATAAGTAAA  | A/T |
| 4 | 85     | AAAAAAGTTATAATAAGGTAATGGATCGTCCCAAGATCATTATTGGATAATTAATACTGAGGCAAGTAAAGCCCAAAACAGCCCATGATA[A/G]CTCA<br>AACTAGATCAACCAGTAATGGCCATGATGCTGATCTTGAGGTGACGTGGCAAAATCTGAATTCGCGCACCGGTAGATTCTTTTCTTTTTCCGT                | A/G |
| 4 | 83     | CTCTTGAGATCCAAAGTTGTACATGGTAACAGTACTTCCCTCAAACTACTAAGGACCGCATACCTTTCGCTGTTCTTCCAGCAAAACAATCTTATACCATA[G/A]TCAC<br>ATGTAGGAGAAGGGAGTCTCAAAGTACTTACTTAGCTAATTTGGCTGGACGAAATTCGAGGCAAGAGTGTAGCTAATGCGCCACCAAGCTA       | G/T |
| 4 | 80     | TCTCCAACAAAGTTTGGTAGCTCAGATGTGGGATATGAACGTGGAAACATGCTAAGACCAAGTACTGATGGTTTTCGAATTAGTGTCTCAAGCACACCAAG[T/C]T<br>GTTCAACTGGAACCTCTGGTCCGTGATGACATAGAATCCTTAGGAGATGTTTATGTCTGGGAGAAGTTGGAGCGACGGGATATCACCAGACGGGGTC    | T/C |
| 4 | 78     | TGCTAAGAACTATCTGGATACAAAAGATGGCACTGAAACATATTTTCACTAGTAAATATGAGAAGGAACTAATAACTGGAACCTCATAGCAGAAGCAGAAG[T/A]TCCT<br>TTGTTTCAATCCTATTCTGTGGAGAGTGGAAATGGCAATGGAAGTATGAAGAGCCTGAACCTTGAATAAAATCATAAGTTTGTGCTTTGGCCA     | T/A |
| 4 | 75     | TTATATCCTAATTAGAATGATATTGCCACACTCTCTCCCTCAAACTACTAAGGACCGCATACCTTTCGCTGTTCTTCCAGCAAAACAATCTTATACCATA[G/A]TCAC<br>CAAGAACTCGCCGCTTAACTTTGAATAAAGGGGAAGTAGACTTCGACACAAGCTATCAACACTATTAATTATGATGTACATTGAGTGCTC         | G/A |
| 4 | 66     | GTGGCTCAGGAAGTGAATAAGTGTGAAGGATCTCCTGGTTCGTAGAGAGAGGAGCCAAACCCGCTAAAAGAGTTTTCTTGTATTATTACTACCTTAAACA[C/T]AAT<br>CACACATGCGTAAGATGATAAGACTAAAAGAAGGAAAAAAGAAAAACTATAGTAGCANCTTAATTAATTAATGCATAAAATAGGACCAAAAGGAA     | C/T |
| 4 | 64     | TGAGAGCCATCCAGAGTCAGGATGTTACTTGTACAGTATGGCTTCGAGCCAATCGCGGAGTCAAGGAGCCTTATTGAATTTCCATGGAAGAA[G/T]G<br>GAAGCTTGAAGGTGAGTTTGAAGAGAGGTTCTTGAGCCATGGGATTAAGTGTAGTATGATCATCAACCAATGGGTTTGTAGGACTCGGGAATGATGAAGAC         | G/T |
| 4 | 62     | GCTCTTAACCAGATCAGATTTNTGGTTATACTATATCACGTANTTCTGCGGTGGAACCATGGACTTGTGTACAGCAACAACCTTGGACAGATTGCTCA[A/G]TCTT<br>TAGGACAAAAGCTCAAATACCACAACCTTGTACACTTTATTCNNCTTCTCATTCTTTGGAAGATTGCTNTCTGCAACACCNAGATTATATCCGAG      | A/G |

|   |                  |                                                                                                                                                                                                                            |     |
|---|------------------|----------------------------------------------------------------------------------------------------------------------------------------------------------------------------------------------------------------------------|-----|
| 4 | 57               | AGAAAGGTTGATTGTACCTCGTTGGGTCTCAACAGAAACCATCCGAGCAACCGAAGGTTGATTTACCTTGCCCGTTTGGCAGGACTACTTCCACCAA[T/C]TGG TATGTTTTCTAAAGCCCCACCATGAGTCCAGTATCTACGACAGTCTTGCGAAGATATCGTGGCTGAAACTCACAGTACTGTTGTAATAACAAAATT                 | T/C |
| 4 | 55               | GACTGGTACTCAAGAAAAGACGGGAGCCAAAAGGGTAAGCAGTCTGTTGTACATGCTCAGAGACTTTGTTGTTTGTATGACAAGTGGGCTAACGT[A/G]TGC AATTGTGTCAAATGAGCAGGTTGATTTGCTGAGAGGGCAGAAAGACAGACAGATGGATGTCTCAGCTTACAGCCAGAAGAGCTGGATGCTATGGAAA                  | A/G |
| 4 | 53               | AAAGGACCAGCGAAACGAACAGAGTCTGGACGGTGAAGTTATCTGAATCAATGGTTTGGAGAGATCTCATCGACTTTTATTAACGGTACGATTCCTCGTGA[T/A]A GCAACGGGAACAAAATTCACGAACGATGTGTAGCTGCAAAAGAGGTTAACCAAAATCAAAGCAGCACGAGATCTACCATTTGAATCCAGAATCCTACG             | T/A |
| 4 | 48               | TGACAGTGCACCTTTTGTATGATGAGGCTTGAATGCACATGGACTCTATTGTGTACCGTTATATGATACACTAGGTATGCCTTTTTAGTATTTCCCAATATAC[T/A]CTA GAAGGATAAATTCGCCAATAGATTTCCAGTGAGCTCTACAAAATCTTAGCTAGCTTATTGTGCTATTTTGTGCGTGAATTTATAGGTGCTGATGCTGT         | T/A |
| 4 | 41               | TTCTATTTTTCTTGGTCTTCTTCTTCTTCTTCTCGATAAGCGGGTGGTCTCCTTCGCTGTTTTCCTTTTGATTATCGGCTTCTGCAGGTTCTTCCAGGCTG[G/C]JACAGA GTGTTCTGCTTCTTCTTCTTCTTCTTCTTCTTCTTCTTCTTCTTCTTCTTCTTCTGATACTCCTGTGAAAAACACAACAAAATGTCAATCATAATTCATAAGAAG | G/C |
| 4 | 40               | CAAAACTTCTCTCCAAAATCATTTGATTTTGAATGAAAATCCTTTTCTTCAAGCCAGTAGCATTCTCAGGACATATTTACCACCTCTTTATCTCCTTG[T/C]CTCC CTTTATACCCACTCCACGTGAAAGCTTGAAGACTGGACAACAACACCGCGGGAACGAGAACTCGGCCGTTTCCAGCAGGCGCGGGTCTCTAAACTA               | T/C |
| 4 | 37               | TGGAAGAAAATCNAAGTAAGTTTTAAGTAGTGTTCCTCTTGGTCTGTGAGTTAGTTACTGTTTTCTGTGAAGTTGATTGATCCTGATAAAGGT[G/A]AATTG AATGGAATAGGGTTGGTCTTCAGCGTGTCTGGAGAACCGTAAAGCGGCTTTGTGCAAAAGACAGCGATGGCTTATGCTCGAGCTTTGGTTGT                       | G/A |
| 4 | 35               | TGTTAGGAAGTATCACATTTGTAGGATCGGACACGTGCCATCATGTGACTTTGCGTTATGTTTCTAATCTAACAAAAAGCCTAGCATATAGAGACCAT[G/A]ATTA GTAGAGACGAACCACGTGAGGGCTCCCTAGATTTTGTGCTGAGTCTTTGCTTTTTCTTTTTGAAAATCCATTTTACCGCATGAAGCCTAAA                    | G/A |
| 4 | 31               | TGGTATCATATGTTACACATTTTCACTCAAACTGTTTATGAATCTTATGATAGACTCAATATTTCAACAGATTTTGGTGGTAGTACAATGGCTA[T/A]TGATGA TTCGACATATGTAATAGGTTATAGTGAGAGTCTGTGGTTTTAACTTGTGCATTTGAACGTTTTAAGTGGCAAATTTATAGATGTCGGAG                        | T/A |
| 4 | 29               | AGGAATGCACAACAAGCTCATAGAATCTCAAATATATTCTATTTATTTATCTACACTTCTCTCTTCTTTTTATGTGAAAATGTGAATGCTCTGTTT[A/C]TAGCTTG TCTATTATGTCGAGAATTTCTTTTTCTGTTTTGATTCTTTTCGTTGTATATCTTTGTTCCAATAAAGGAAATGATGTGCTTTACTCTTAT                    | A/C |
| 4 | 25               | TTTCTCTTCTCCCCAGCTTAATCTTTCTCAGGTTTTAGTATTAAGTTATAGGATTAAGAATGCAACTACAGATTATAGATTGCTCAGAATCATATAC[T/C]CTTTTTA GCCTTTAATGCTGATTCAAGTCTAGCTACTGATTTGAAACCTTGCTTGGCTGATTTCTTCTGATAACTTTGCGTTATACTTATCTTT                      | T/C |
| 4 | 19               | TGAGTCACAACAACGCGAGTGAGACAGTCACTGCTGGTTGATTCGTTTACGGGTTTAAAGGTAAGTGAAGTTGTTGTGGGTAGAGAAAAGGAGTT[G/C]AA GAGAGCAATAATATTGGATCTGGGAGGTCAAGTTTATTGAAGAGATCTATCTTACAGTGGAAAGTAGTACTAGCTAGCTTCACTGCTAATAATA                      | G/C |
| 4 | 17               | TGATTCAAGACACCAAACCGCAATGTGAGAGACTTTAAGACTAAAAATCATGGATAAGACTAAAAAACATGGATAAGTATCAACTGTTCTCACGATT[A/G]TTTTAT TCATACCCTGACTTAACTTAAACCCACTATACTAAATAGAAAGGTAATCATCAAAAATCAGTATGTAAAAACCCTTTTGTGAATAAAA                      | A/G |
| 4 | 15               | CATCGTTGCGGTTGTTGTTGCTGTGTACCTTCAGTCTACGACATCATCGGAATCAAAACAGGAGCTTTCTCAATCGCATTGCTTCCATACTTCTCAT[A/G]CTCT TAGCCTCCTGTGCGCTGACCTTTCCACGCTTTTATCCGTAGCAAAGTTCTATGATGAGCAAGACGTAGAAGGACGAATAGATGAACCTTTACTA                  | A/G |
| 4 | 14               | TCGTCCATTGTACCATGATTTGAATGCTTATAGGTTCTCTTTGATGAGGTATTATTATTTCTTCTCAAGAGTTATTTATTTGCTGTTTAAAGAGATGC[C/A]CTGTCT CGTTGCGGTGCCTAACAAAGTATATTGGAATGAATATGGTAGGATGGTGATCCTCGTCTCTCATGTTTTGGCTTGATGAAGAACAGTAGGGATG               | C/A |
| 4 | 9                | AAGCTCATGCCTCCATACATTGACCAAATGCGCGCATAGGACCTCCATAGCCACCAAATATTCAGGACGAGAAGAATAACATGGAACCTTGCGCCA[G/A]CG CTAGGTCCAGCTTCATCAAGAGGCGTTGCTGAATCTATTGCTACCTAAACCCGAAAATCAAACAGTGTAGCTTCTTTATACATCTTAGATAAGTTT                   | G/A |
| 4 | 7                | GTGTTATTGTGAGTGGTGTGTGCTTGCAAAATGTGCCAAGAACTCGATGATTATGATCTGAAAAGAAAACCGTTGCACCGATCACAAACCAAAGAGCTA[A/G]TT GTCCAGTATTCCTTTGAAAACATCGATCTCTCCATCTCTCGCGAGCTTATCTCGTTAAACACCTGGAGTTTTCAGAACCAAAGTCATGTCAAGAATC               | A/G |
| 4 | PERL_848945_Ler  | GCAGTGTGGAGAAAATAAACGTGTTATAGGTAAAGCAACCTCTGATGCTGACCTTCTTCAAGTACTTTTTTACATTCCTCTTGTACGAATCTTTGTG [G/A] GACAACAATCTTTGTTGAAACTTTTTCCATCCCATTTTGTGCTAGCGCTCTTGATCAAGCAAAGCCATGGGCCATGCACCTCTCTTGCAAAAGACG                   | G/A |
| 4 | 2                | CATTGTTTCTGATATTAAGTGGAACTTTTCAAGGTTTCACTAGGCTTATAGCTTCTTTAACTAAAGTCTTGCAGGAAAGTTGGAGATCA[A/C]ACTTT ATTGTTGATTGACCTCAGGATAGCTGTCTGCTTGAACATCATCAAGATACAGAAGTCTCTTTGAAAGTTTGGCAACGTTGCTTTTCTTGGCTATATTTAT                   | A/C |
| 5 | *PERL_853156_Ler | TACGAAAAATTCATGATCAACCCCTCAGAAATACACTATCTGGATGAATATTTGATAGAGTACGAGATTATATATACTATGCGAAAAGTAAAGTTTAACCA[G/C]AGTTT GGAAATTAATGAGCAGACTCACAGTCTTTCCCCTGAAGCATTATGTACTCCACGCTAAATCCGATATCCTGGTAAAAGACAACAGAAATATA               | G/C |
| 5 | PERL_855702_Ler  | AAGAGAAGAATGGAGCAGCCGTACGTGTACGCATACCCGCAAGGTAGTGGCCCTCGGGAGCTCCGACTCCACAAGCCGGAGGAGTGGTAGTGGATCCAA[A/G] JGTAAGTGGCTCCTTACCCTATAGATATGGCATCGTACGGAAGATGATGTCGTTAACGGACGGCAATTTCTGATAACGGACGTCAACGGAACCTGCTG                | A/G |
| 5 | PERL_858841_Ler  | CTGAAGCCTGAATTGGTTAGTGGTTACATTACCCGTCATATGCCTGAAATATCCGATACCCACACTTACTCGCTCACTCATGTGCATAATTGCTC[T/C]ATC TCCATGCATCTGTGTCTCCTCACTTGTGTTACGGGTGGCTTTTGATATAATAATATTAGTATAATCTCGACTAATATTGTTATAACTCGATATC                     | T/C |
| 5 | PERL_862557_Ler  | GTAGCGCATCAATAATAAATTTGGAGCATAAAAAATGATAATAAATGACTATTGTTGATCTTGGAGTCCAAACAAACTGGATATCTTCAACCGATGT[C/T]GCCA GGCTTTTGTCTCCCGAATCCAAAATTAAGACTTCCCCTTGACCAACTGAATGACTTGTTTAAATACACTTCAAAGATAGCTTTGGATCCATTT                   | C/T |
| 5 | PERL_864956_Ler  | CTCTTTTCCAAATCCAAAGATCTTTTTAACCCATCTTTTTAATCACTCTTCTAGCCCTTACCTTAGACCCAAAATAATAGACTGGATTGGAATTTGTTGATGATTTGA[T/C]CCGAG GCTTCCCATACAGTTTCAAGCAACGCATGATCTCTGATCCCTCATTGCTGAGGCTTTGCAACAAGAGGAGACTATCATCAGCAAAAAGAAAGATG     | T/C |
| 5 | PERL_866977_Ler  | TCGTTCAATTATATAAGATCATGAACGGTATGTTATATGAGCCTCCTGGAATTAGGTTATCATAACCTTCCCAGAACCATGACAGTCCATATTGCGGCT[A/G]CGA AGTATACAAGATGTGGACAAGCCTCAAAGGATCTTATCTCTCCTACTTCTTCTATTTCGGACCTCAAAAACCTAATTCATATAATTTCTAATAT                 | A/G |

|   |                 |                                                                                                                                                                                                                   |     |
|---|-----------------|-------------------------------------------------------------------------------------------------------------------------------------------------------------------------------------------------------------------|-----|
| 5 | PERL_869153_Ler | AAGGAAAAGAGTAGGATATTTAGGTTATTTACTATGGACACTCTATTTTGAATTCTGGTTATCAAGTTTATAAGATTGTTTTGAGCCTTTGTGTCTTAGA[A/T]TCGGAAGCAGAGGACTCTGTTCTGAGTTCGCCGCCGCTTCAAAAGAGAGATCTTTCAAAGTTTTCCGGGGAGTTCGGAGAGAAACTCGATCCGTTCTTAC     | A/T |
| 5 | CER482823       | ATCTGCTTATGTAGAGTCTCAATCATTTAGGTCTAGTCTAAATCTTGACACTTTTGGAAATGTTTTGCAGTGGTGGGCAACTGGAAGCTCAGGAGGAGCATG[C/T]GATAGCGAAACAGAACCAGTCAAGAAGCATACATCACTAACCCCGTACCCGCTAAAATGAAAGTGCTTGAGAAAGTGTAAAGAGGTATGAAACACCTG     | C/T |
| 5 | CER477094       | TAGTTTCTCTTGGCTCCGGTGTGTAGAAATATATACTGATCGGTATTGTGCTCCCAAAAGTTCTCCCTGCAACAGTTTAAAGATCGGTTAGGAATTGAAC[G/T]TTGTC AAGATCACATTCACTATGAAAGCTATAATTGAGGACAATGACAAGCACCATCAAATTTCAATTTCAAGATAAGAACACAAATTCAGTTTAAACCATT  | G/T |
| 5 | PERL_875329_Ler | TACAGGATCCAATTAATGAACGGCTCTCGTTCGTCCTCAAGCTTCAAATCTGTATTTTAAAATATCAACGGCCAGGATTTCATAAATCCCTCGGTGGCGCG[C/T]JAGA GACAGTCAGTGGCCATTTCCGGCGACGGAAGTAGGCTCCGCCGGCTGCTGCTGCTGATACAATGAATGTTTCCAGCAAGAACGATCTCTCTTG      | C/T |
| 5 | PERL_877303_Ler | GGAGAAGAAGAAATGAAATTGAACAAGTTGGAATGGAAGAAGACAAACTACTTTGAGAAGAAAATAATGCAACGAGTAGTTGTGTTTTGTGTACTAGTCCCTG[A/C]JAT TACGGGTTCCAGCTTTTAGCACAATGTTTCTGTTTTGCTTTGATGCACACCTTGGCATTACAGAAAAAGAATAAATGAAGCTAGAGGAATAAACCAA | A/C |
| 5 | CER482707       | ATGTGTCATAACATAAGAAGTTATTAACAGCGTAACGTATATGAACCTTATCCCACATCATATAATAAATAACGTCATACTCATATCCCAACTTTAT[C/A]JACGCT ATTCTCAAACAGCAAAAGAACCTTAACCAAAAAGAAAACGCTACGGAGACATATGGAGGAAACATCACTTCTGTTAGTTTACAACGCTTAT          | C/A |
| 5 | PERL_881677_Ler | GTTCCGTTTTGATTTTTCGATTACGGTCTGATGTAGATTAATAAAAATATAAAAAGTTCCAGAAGCATGCAGAAAAGATTGAAGAACCAGGATAC[C/T]GAG ATTTACAGAGGATCAAATCAAAGCAAAAAGAGAAAAGAGAGAAGTAGAAGAATCATCATCTTTAAAGCCAAAATATCAATAAATTAGATTAGAG            | C/T |
| 5 | PERL_884176_Ler | AAAATAATAAAAAAAAATAGTTTCCACAGTTTATAAATAAATAAGAAAAATAGTAGTAGAGCTTAACCTGCGCCGACATCTTCGAAAAGGTAGATTCCG[G/A]JTTAA AATGCGCACTACTCTTCTTCGTCAGCTTCCCTCACTTACTTGGTAAGAATAGCTTTGACTATTACACGAAGCTACTATTTAGTTTTTAAATGTCC     | G/A |
| 5 | PERL_886324_Ler | GAGACCACCACATCATTAGCATTACAATTCTGTAGTTGGACCTCTCAAGAAACCGTCTAGCAGAGGGAAAAGAACATTACACCCGCGAGCATGTTAGG[T/C]GA CAAATAGGAAACGACTGCTATTATAAATAGAGAAGGTGAGTGCATAGCACTCCCAACCAACTTTGATAGTTCTGGCAAATGCTGGAGATCTTTCC         | T/C |
| 5 | CER440051       | ATGCCTCTTCTCTTGTGAACAAGTACCTGAATACGATTTTATGACCGAATCTAACTATCACAATGAAAATGCCAATGCGTTGTGACGCGGACAGTCC[T/C]ATT TACGGAAGGCGGTGAGATGACATTTATGGTTTCTAGCCAAGAGAGAGCAGGTCAAAGCAATGATCAAATCAGGCGGAGGATGATAGAAGCGAGACC        | C/T |
| 5 | CER477932       | ACTCTTTAACTTGATAACAGCAAATTCGCTCTTATTAGTAGTATACTAATGTTTTGCTATTGCTTTTGCCTTTGGCCAAATGGGCCAGCAGTTCAAATGCG[G/A]JCATC AACAAACGGGACGTAGACTACCATAACCCTTTACCTTCTTCACTTTCGTTCTACAAGGAGTCCCGGAGAAAATATCTTCTTCTCGGAAGATG      | A/G |
| 5 | PERL_891788_Ler | CTCACTCTTTCGCTGAAGTTTCAAGCTTTTATTTGAATTCGTTATCTGGATTCTGTTTTGATTTGATGTTGATGAGATTTCCGCGCCTAACAGGATTG[T/G]AACAG CTCGACGCACATTTTATGAGGCTGTGGCTTTTACCAGGAGAGCTTAAACGGAAGAGTCTCCCAAGGATACTGTGAAAGGATTGTTAAACAACCAAT     | T/G |
| 5 | PERL_894000_Ler | GCAATGGAGTACTAATCTCAATCGAAAACCTTAAAGAAGGGCAGCCATACTCATATACCGTGGCAAGAAGTACAACGTCCTTATCGAAAAGTATGAGG[C/A]JCA GAATCTTTTACGAAAAGAAAAGCATTGCAACGATCTGTTGTGATGCACGACTCGGCGTAAGTGAATGAATGAAAACGATCTATCTCTTTTCAATTT       | A/G |
| 5 | CER483050       | TGTTTTATTTCCGCGATCGATGAAGATCTCAGATTTTGTTCAGACGAGATGCGTCTACGAATATGTGAGCGAGACTTTTTCTTCCACAAAACCTTAT[C/T]GGG CTAAGATCAGCTTTAGTGGGCTTAAAGGATCTTTTATGGGCCCAATATATGCAATTTCTCATTTTTTGTATAAAAATTTCTGAAGAGGTAGTGACAC       | C/T |
| 5 | PERL_899013_Ler | GGTATTTAATGTGTTTTAAAGTTTTGACTATGAAATTTATGCTGATGTCAGTTGGTGGCACATGGTTTTAACTTCTAATATACAAGTTTTGGTTGATAA[G/T]TGGA CTCATATAGGCGTCCATTAGATGGCTCATTAAACAATAGACTTGATCTTACAATCGGACTCAAACATGTAGTCAGTCGACATCGACTACAGTGGCT     | G/T |
| 5 | PERL_902420_Ler | AAAAGTTTCTTCCGACACTCCCATTTGATCGGAGGGCTTCGACATTGGTGGGCTCTGTTTCGCCGCTCCGGCTAAAAGTTAGTGAAAGCAAAAATGGA[G/A]JG GGTACGGTGGCGCCGGAGAAGATGAGTACGGTCCGATCCATCATGAATGGTCCGCTCAAGGAACCGAACTGGTATCGAAGGTAACGTTGATTATG         | A/G |
| 5 | PERL_905180_Ler | AATGGCTGATCTCGATGTTCTCCTCCTCAAGTTCCCTCAAAGTAAAACACTAGAGACTTTGACAAGCTTCTTCCGTCATGGGAATCTCGTTGACCCCGGCTT[C/G/T]TAC CCGGACCCGGCGTAAACGCCTTTTATCCCTCAATTCGCTTCTCGGTTATATTCCGATCGTTTTTGTGGGTTTTCTGAGCTAAGTTTTGTTCTGTA  | G/T |
| 5 | CER483565       | AATGGTTATAAGGAAAGAGTTTTTCGATGGTATGAAGGAGATTGGCGTGGGGATAGGCTTATGTGGATAATGGTAGGGGAATAAATGGGACCAGTGCT[C/A]JG GAAGGAAGGAGCCAAGAAACAAAGAGAGAAAGTAGGTAACCTTTTGTGAAAACAATGCAGTTGTAGACTTACATTTGGATTCAAACCTTTTAGTGTTC      | A/G |
| 5 | PERL_911371_Ler | GGCAGGTCCTTGTCTTGGCCCAATAAGCTTTGATATTTGACCTCAAAGAGAGCAACAACCTTTGATGAGCGTGTTCGAAAACCTGCTAC[A/G]JCG TTTCCACATTACAGAGATGATCAAGCTTAGCTTCTCAGCTCATATTCTTCTGAATCACCTACTTTATGTGAAAAGACTTCCAATCATTCTT                     | A/G |
| 5 | PERL_913730_Ler | GCGTTACTAAATTAAGTGGTGTATATAAGAGTAATAGTAGCACAGAAGGACCAAGATGCAAAAATAAATTTGAAATCAAGACTGGGGAGTGACGCACAC[T/A]JTA AAAGGTACGGACAAAACGATGCATTAGATCTTGATTGCTGACAACTGAATTATAAGGGTTAATTGCAATTGAGAAGGTTTATAATAAGTGTCTTT       | T/A |
| 5 | PERL_916785_Ler | CTATGTAGAATCTAGAAAAGATTAACAAAATTAGAGGAATATAAAAAGTGATACAGCAACTGTTTCTGTCGCTTGACTTTATCTGGGAAGGGAATGAGTTT[C/T]GGG ACTCGTTTGAATCTTCTAGTTGGTATCAAGAAAATCATCTGCGTTGCTTAAACAAAACCAATGTTACTGACTCAGAAGGAATGT                | C/T |
| 5 | CER434838       | AGACCAGCCAATATGGACTGCTTCTGCAAGTGGCTCCACTTCTTGAACCTCAATTCATCGATAGGACTTAAATGGTTGGATTAATGAATCCTATTCCG[T/C]CCT TGCTTTGTCAAAGTATGTTAGATGAATGTGCTTTCATAGTTAACTAAGTGGTGTCCAAGAAGCGAGATATTGTGAACCTGATCTGGACCCATAT         | T/C |
| 5 | PERL_923014_Ler | AGAATACCCCGAAGCTCGATAGTAGTACCTCCGCGTTACGTGATTGCGTTACGGGGAACTGTCCCAAGTGTGTGAGTGATTGGATACATAACAGCCGAT[T/C]GT ACTCGAGAAACTCCATGGCGGGGTAAAGCATATGCATCATTAGAAAATCTATTTTGGTGGCCAAACCGGAAACACAGCTGTCTGGATCGCTG           | T/C |
| 5 | PERL_926808_Ler | ATAATTTAGTCATGAGACTTTTCCAATATTTGTTTGCAGAAAACCTGTTGGCAAGAAATTTGACCTCTAATAACTAAATGAGTACACCCAGCGGC[G/C]JACA ATATTTACTCAGTCAATCTTCAAAGATGATAGAAGATTGTGTCACGAAGATAAATGTTCCGCTGTGAAACGTTGAAATCACACCCGGTCAAATTT          | G/C |
| 5 | PERL_930173_Ler | GATGCCAAGGCCTTGATTCCGCTGATCTGAGACCAAAGTATTTGAGATGTCAAGGTCATTGACTGAGTAGCAGTTCTTGGCTACTGCGACAAGGCTTGCCT[T/C]JTG TGATGTTCTGACGCCGTCAGGTTAAGAGACTCCAATGTGCGTCCGTTGGCAAACAGAAATGCGAGACTGTGTTGTCTGAAACATTGATACATTCG     | T/C |

|   |                  |                                                                                                                                                                                                                      |     |
|---|------------------|----------------------------------------------------------------------------------------------------------------------------------------------------------------------------------------------------------------------|-----|
| 5 | PERL_933560_Ler  | CCAATTTGTTTTAAGATGAAAACCTGTGATTTTTAAATAAGCATTACAAATATTTAAGAAGTAGGGTTATATAAAAAATACATCGTATACGTACATGCGATA[T/C]TGCTT<br>ACATGAAATAAAGCAATTAGGTACAAGAAAATGAACATAACCAAGACTAAGGGAATTTTGGCCATATGAAAAGATGATCTTACCTTCCCTC      | T/C |
| 5 | PERL_937585_Ler  | CGGTTGATAAAGCGACGCGGTGGTTATGCTTACCTTACGCTTATGGCTCTGTGAAGAAATCTTTGAAGCGTATTTACACGCTCCGGTGGACACGTCA[C/T]C<br>GAGGTACAGTTACCTTTCCGGTTATTTCCGGCGGATGAGATTATTGACCCGTTTAGGATTGTTTAGAGTCTGGTAAAGCGAATGGTAGGAGATTAGG         | C/T |
| 5 | PERL_942083_Ler  | TATAAATTATCTAGGCCAAAAAAATAAAAATAAAATCTTAATAAAGTAAAAGTAGTTTTGTTTTGTCATCTAGCGACTAAGCATTCTAGGCGCTAGGCCGA[A/G]GATC<br>ACTGCCGATTTAGCGCCTAACACTTCTTAAACACTAATCCAACCAATGATATATTAAGTCTAAAACATGAATGCAATTGGCATAATTATAAAGC     | A/G |
| 5 | PERL_946009_Ler  | TAAACCCGCTAGTTAACCATCACATTTGGCCTTTGCCATTGTAGCTCACAACTTAGGCAATTTTAGGATTTGATTGGTTAATAGATAGGTGCAAAATGC[A/G]AGA<br>CTTTTTGGTAGCAATGGTTGCTGTTTTAAGAGCTATAAAAAATATTTGATTGGTATAAGAGTTGAAAATATGTGTGTTTGGGGATGTTGTTAT         | A/G |
| 5 | PERL_949882_Ler  | AATCTTTGTCACCACGGCCACTGCAGTTCACACTACCCTTTGGCTCCATCACGAAGATAGGCACGAGTTTTGTCGAGGAACGCGAGCCGCTGAGACGCTTC[T/C]A<br>ATGCCGGTATTATCCCTCCAATCTGCTTAATCGCATGCACGCTGCAGTCGACAACATATAATTAAGCTTAATGTTTTATGTAATATATTAAAAAA       | T/C |
| 5 | PERL_952964_Ler  | AAGACCGAGTGCCTGGGAGAGGATTGGAGACGACCAAGTGCGTGGGAGAGGGATTGGAGACGACCGAGTTCAAGGGATCTGTACCATGTGTTATATCGC[A/G]<br>JGACCTTGGTTTTGTAATGGGTTGGATAGCTCACAGTGGATCAATGGAACCAACCAACCAAGACCCGATTTCTTGCAAAAGATTTCTTTCTGGGTGCGCATTAA | A/G |
| 5 | CER477084        | GAAGCTTGGGAGAGATTGATCGTGCTGCTACTCTATAAGTATTCCCTCCAGTTTGAGTCAAGCTTCCAGCTCAAGTTCTGGAACAAATGGCATGA[G/A]TT<br>CGAGGTCACAGCACGGGAACGAAGATACCTACAGAGAAATGCTCCGATCAAGCGAAGTGTTCGCAAGCTATAGTCAGGTCGCATCAGTTTCTCTT            | G/A |
| 5 | PERL_960485_Ler  | CCAGGTGGGGCAAGTCTGGCAAAGGCGTGGCACACTCCGGCAGGTCCGGCGGGTGGTCCGGGGCGCATTGGCAAATCTGGCCAAGTATGGCCGAAATC[A/<br>G]GCGTGCTCTGGCTAAGACTTGGCATGGCTGGGCCGGCTTTCTGGCGGCACCGGTTACTCGGGCGAGTAGATGGGCCTGTTGCACGGTGCCTAGTGAC         | A/G |
| 5 | PERL_962058_Ler  | TGGTGCTCCTGTTATATTGCTTAGGAATCTTATCCGAAAGGAGGGCTTTATAATGGGACCAGGCTACAAAACGCAACTTACCAACAAGTTGTGCAAG[T/C]GA<br>GAGTAATAACTGGAGATAGAATTGGTAAATTGCTTGTATTCCTCTAATCAACCTTACACCTTCAGATATGAAGCTGCCATTCAAGATGCCAAGAAGA        | T/C |
| 5 | PERL_964521_Ler  | TAGGAAAATGGGAAAGAAGAAGACAACCCTAATGTCGACTACCAAGATCGCTTGGATAGTTTACTAGCCCTGCCAGGACGGGAACGACTTCCACTCCTGT[T/C]T<br>GAGAAACCTATCCCTGGAATGGAGACTCTAGTAATTGCGTGAGCTTTGTTTAGTTAGTTAGCATAGTTTGATTGTTCTTTAGATATCCTTAGTA         | T/C |
| 5 | PERL_965006_Ler  | CAAGTAGATTTTATGAGATGCCATTAGTACCAAATGGTTTTCTTCTTTAAACTCAAAGCTATATTTGTTGGTAAACCCATCATGTATCACTCTCCGA[C/T]CAAA<br>TTGCCAAGGCTTCTTCAACAAAACGTGATTAGCTTCCAAGGGCAGAATACATAAGACCTCATCTCATACTTCTCAATGGCTAACGGCACCCTTG         | C/T |
| 5 | PERL_968445_Ler  | ATCGGCTAATACTACATATCAAGAAGACTAGTAGGAGTGTGACACGTCGAGCCCGCCAAACCGGGCGCTCCGTGGCAGACCTCGTCTTCTTCTTCATT[C/T]G<br>CAGCGTCCGGTCCGCCAAGGACCGCGGGCGACAAAACGAAGCCATACCCACCCCGATTGCCATTGGTCTAACGGGCGCCGCCACAGACCATGACC          | T/C |
| 5 | PERL_972440_Ler  | CCTCGAGCTTCATCATTTGATCCTCGGGAAGTGATCTTCGAGCTGAGAGAGCCAAGGAGAAGGCAGAGGAGAGCATCAAACGCTCGACAACCTACTCGA[T/C]C<br>GGACATGACGAGCAAAATCCTCCCGCTTCAACATCAGTTCTGCTTATACTCAAGAGAGATTGGACGATTTCTGCTCCGTCTACTTCACCTGATCACTG      | T/C |
| 5 | PERL_975061_Ler  | TGTGGTGGCCTACCATTATAGAGTGAAGAACTACTGTGTGAAGAATCGGATGTTTGTGTTGGGTTAGAAACCCCATCGGAAGTACACCAGCAACGCC[A/G]AC<br>CGTTTGAAGAATCGGAGAAAAGAAATCAAATTGAGTTGGGATCGAGACAAGTCTAAAACAAGCATACTTCAGGGAACAGGCAAAAAGAAAGGAAAGTTC      | A/G |
| 5 | PERL_976568_Ler  | CCCTGCTTTTTGCTGCATTATAGAACATTTTATTGTTCTGGTCCCCTGCTGCCATCCAGTGAAGCTTTGCTTTCTGTCGAAGATATTTTCTTTCGATTT[C/A/G]GACA<br>TCCTCTGCCATCTCGCATATGCCACTGCCTCTGCATGCACAGATTGAGTTGTTGGAGCCATCATTGTTGCAGTTTGAATTCGCAGAGCTTCTTGT    | A/G |
| 5 | PERL_980169_Ler  | TGAGGATGAGGTTGTGAGTGACACGGATTGTTGAGGTTTCGTTGGCTGTTAACGCCGAGTAGTAGTCGCCGATCATTGGCTCGTGAAGTAAGTACTGAC[G/A]C<br>GGCGTTTTCTCCGTCCGCTAAGCTCGCCATCGTCACTTCTGCTTCTTTTTCCGCCAAGAAACGAGATATCTCCGATTGATTTATTGCTAC              | G/A |
| 5 | PERL_984734_Ler  | TAAGAAAAGTGTACGTTACATATGATGGCACTTCAATAAGGCATATGAGGGTGGACTATGATAAAGCCGGTCAAGTGGAAATGCTATGAGTACGGGGACAA[A/G]A<br>CCGGAACACAATATAAGGTTATTCTAATAAAATATTTGTTTACTATTGATATATTTTTGTTTAAACAGTGGATCACTAATATATAAAAAATGTTTT      | A/G |
| 5 | CER431735        | TAGGACACCCTTAAAAACCAATATTTAATAGAGAAACATACAAAATCTACGCTAAAGATTAATCTAACCAAGGACCAAAGTACCTTTGGCTTCCC[A/G]GTAC<br>TTCCACTGGTGTAGAGCAAAAACAGGGGATCTTCTGCATCAACCCATCCACCTCACACGATGTTGGATATTGAGAAATAACATCCTAAAGTGATC          | A/G |
| 5 | PERL_993253_Ler  | CAATTCCAAGTAAAGTAACAGATGGCGAGGAAGACGTTTTGTTGCTTTTGTAGTTGTTACTTCTGACACTCATTGTTGCTGTTGATGAGAAG[A/C]CTT<br>TTTTGGTCTTTTGGTTCTTTTTGTAGTTATCTCGGATGAATAAATCTGACGACAAATTTGGAACAAGATAGCCTTGTTAAGATTCCAAATG                  | A/C |
| 5 | PERL_998723_Ler  | AGGTGGTTACCATGTCTTCGCCTATTCTCTACCCCATATGGTGTGAACCGCTGCTTGAAGGAGATATCGAGCAACGAAGCTCTCAATTCTATCGCGC[C/G]AG<br>TACCCTGAGACTGTAGCGAGTAAAGAAGACCAGTTGTAGAGAAGCGAGATTGATGGTCTTTGGTTCTTCCAAATTTACTAAATGACTTTATCAGGAT        | C/G |
| 5 | PERL_1004314_Ler | GGCCAGTGGCCATTTATCAGATTTCAAATAACAGATCTCAACACTAGCATGGCTACACACGTTGCAGATTAATGCATCAGTCATATCTCAGCATCC[A/G]ACA<br>CTTGTCAACCTTCCATTGGATCTTAACTCTACGCCTCGAAAACAGTTTTATTATTTATCATTCCATTTCTCATTGTATCTTTCATCAGTCTCTT           | A/G |
| 5 | PERL_1008140_Ler | TGGGTAAGCCGATTAGTACGGATTTTGGTGAAGAGTTTGAAGCTCAATATATTAATAAAAATATATGTTCCGTTTGGTTCGGTTTGGTTGGTCCGTTCTT[C/A/G]GGT<br>TTAGGTCGCTTTGTATATAGATTTTCAAGAACTTAAATAAATATCGGATAAATACCATATTTTCGGGTAATAACTCGCATTTACAGAGTAAAGTT    | A/G |
| 5 | PERL_1011779_Ler | AAAAAAAAGATGAAGACTTTATGACAGAGATACTTACAGGAAGTTTCATCAACATCTAATTTGACGAAATCAACATCATTGAATTTATCAGCCATGGCATG[A/G]ATC<br>GCAGGCTCAATCACTACATGCTCCGCACCATGAGGCCGAGAATCAACACCAGCTTTATTATTCACAGAAACCAAAATCAGTTAAATCCATGCT       | A/G |
| 5 | CER438753        | GGCTCAGGTTGAAGACGACCGATTTGTTGAAACGTTGAAAGCGGAAACATTTCAACCATCCCAATGTTTCAACACCTCGATGACTCT[C/T]TT<br>GCCGTCGATACCCCTTTAATAAGCAACAGTCAGACATAAGACACAAAAGAGAACCACTTTCTAATTTAGGACTATAATCCTCACAAAGCAGAATCGAAG                | C/T |
| 5 | PERL_1018094_Ler | GTCAAGAGAAGCAGTTGTCTCTTCTTGGAAAGGTGATGAATGCTGGAGACGATCTGGTGGTTTTAGAGCAACTCGAAGAAGACACAGACGGAATGGCTCT[A/G]C<br>AAAAGGCGAGACGAAGCATGGGATCGATGAGCGTAATGTCGGTTCAAAGGAATGGTCTACATGGAATACAACCTAGGCCGTCACAAATCCGGTCAGC      | A/G |

|   |                  |                                                                                                                                                                                                                |     |
|---|------------------|----------------------------------------------------------------------------------------------------------------------------------------------------------------------------------------------------------------|-----|
| 5 | PERL_1022802_Ler | TACACAATATCACAGATTCATTTTAGAAAACAAACCACGAAAATGTGTGGAAACAAATTCAGATGAATGGAAACGTTAGAGTAACCGCCGAGTTACCTG[A/G]GCGCGCAATCTGACTACTTCTCTGATTGAGAAAGCTCATTGTCTTCTTCAAACCTCTCAGCTATACTTGTGAAAAACCAAGACCAACGTTTAAAGGAATGG  | A/G |
| 5 | PERL_1026634_Ler | TACGGCCTAACCGCCGACAATCTCCACCTCCGTCAGCGAGTGCAAAGCTCCTTCAATCCACAACCTTCCAAAAAGTCCGTCCTTACGGATCCGACCCGG[C/G]TGTAAATCAAGGCCCTAGCAAAACCGGGGATCGAGATCGTCACTCGGGCGTCTAACGGCGATGTACCCGGCTAGCATCGGACCCGAGTTTCCGCCGAAGC   | C/G |
| 5 | CER441019        | CACTTTCATGGTTTTCTCTGAGAAGGAAGAAGTTTTAGGGAACTTAATCTTGTAAAGCAAGTAAAAGACAAATCGTTTTGAGGCTTTGCTTCCCGCATC[G/T]ACATAATCTCCAAGAAACAAGTAGTTGAATTAGGAGGGTATCCGCCATGTTTCAAGATAGTCTCAAGAGATCCGGATATTGTCATGAATGTCCCCTGTTT   | G/T |
| 5 | PERL_1037843_Ler | ACACAATCTTTTCGATCTTAGCCGTTGATTACCCAGTGAATAAGGTGAGCTGCTATGTGTCTGATGACGGTGCATCAATGCTCCTGTTTCGATACATTGTC[C/T]GAAACTTCCGAGTTTGAAGGAGATGGGTTCCGTTTTGCAAGAAGTACAATGTTGAGCCAAGAGCTCCAGAGTTTACTTCTCAGAGAAGATTGATTACC   | C/T |
| 5 | PERL_1042398_Ler | ACAAGATCGTAAACGAAGAATGCTTGAAGATAACTACCATGCCACGCCGAATTTCTTATGCAATCCGTCAATTATGCACGTTCAATTGGATGTTCTCTATAC[C/T]GCGGATGATGTTTACAACCACCGCGAAGGAAAACCTCAAAGAGTATATGAGGCTTTTCTCGTAGATCCTATACTTCTTAGGACTTGGGATGCATCATGT | C/T |
| 5 | PERL_1048451_Ler | TCTCTACTGACGATCTCAAAGGAAAAAGAGTGGAGATGCAAGGTTTTATTCAAGATGCTGCCCGTGAATTCATCAACCAGACTTCGAGGCGTCGCAGAC[A/T]CTGGGAACCATCAAGAATCAGATTACTAGAAAAATGATAAATCTAAGGTAGGTGATACATTCTGTATCTATAACAATGTTTATTTAAATGTTTAAAG      | A/T |
| 5 | PERL_1054488_Ler | TAAACTAATTGTATATGTGTAATTTGGGCAACGTAAGAAAAGAAATTTATGCAATTTCCGTAACCTAACTTATGTTGGGAGATCGATGAGACGAC[T/C]CAAACCTGAATCATTCTCATTAACTCTTCCAACACTTGATTATTATCTCAATATAAACAACTACGTTAAGAAATTCGCAAACTGTTTTCTTTTAAAGAAAAT     | T/C |
| 5 | PERL_1058363_Ler | CATTGCATCAAATTTTTCTGACCCGATCACTTCCAGTCCGGACAATAATCATTTTTCAAACCAGACCCAACTCTTCAAGTAAACACCGAGCTTTTGT[C/A]GACTAAAGCAGCCACAGACTTAAACGAATTTTTCTTCAATTTTCGAGTGGTTGTTCCGTTCAAATTCGAAGCCTTTTTTTCATCTGTAGACATGTTTACAG    | A/C |
| 5 | PERL_1060855_Ler | CCTTCAAATAATGTAGACGAAGGACTTGTAGCTCTTAAAAGGATCAACCCCAACACCTTGTAGCTTCTCTTTGTTTATTAATTTCTGTCTCTTAGGCGA[G/C]GATCCACGTTAGAGACTCGAGATTTGCAGCATACATCAGCCATGTCAAATCCTTTAGATGTATGCATGAGTTTATTACACAGCTGAGAGATCCTTGA      | G/C |
| 5 | CER436994        | ACTCTGATTGCTGTGGTTGAAGAACATAAACGGGTGTTTTAGTTGTGAGTTGAGTACAAGTTTTGTTACAATGGAACCAAATCAAGACGTTGCAGACG[G/A]CGTTGAGAGTGAAGATTACATTCTGCATCTAAGTGTAGCAGCCTGAGCTCCGGCATCATATGGGTTGTACGCCATTAGTTCATTCAACTGAGTCTGAA      | G/A |
| 5 | PERL_1067562_Ler | CCATGAACCTCAATACCTTCTTTATATCTTCCAACCTCTCTCATGGAACAAGCGGTTCTTGAGACGGATTCTCCTGTATCTTTCTTCTGCTGGCTTCTTCGC[T/C]JACGTTCCCTACAATTGTCAGAAGCGTTTCAAATACCCTCCTCGTATTCTTGGATCTTCACTTCAAAAACAAACAAGATTTTATTATCTCTCTCTCTT  | T/C |
| 5 | PERL_1070916_Ler | AGATCGCAAGAACAAGAACAAAGAAACAAAAGAAATCTCTCAAGCATCATCATCAAAACATGGCGAATCTAGTTACGTCATGACATCATC[C/A]GTTGGAGCTAGCTGGAAATCTCTCAAGCATCTTCGATACTTCATCTTACCTTTTCTTATTCTTATTTCGAAGATCACTCTTCTAATAATCCTAATTC               | C/A |
| 5 | PERL_1073332_Ler | TAGCATCTGAAATGAGTCCAAGCATTGTAGCAAATATCAACATACCACCTGCACCTATAGCAACAGAACTATTCTTGTCCAACACCAACTCTATCAGC[A/G]TGACTTCCCGAATCCGCTACAAAAGTCCACGATAACCAAGGGCTTCATCAACCCCAAGCAGTCACTAACAGCATACAATGCTAATCCACCATAAACTATAA   | A/G |
| 5 | PERL_1075675_Ler | AAATCCAAAACCAATCAAAGGACGCTCTGTTTTCTGAAACAACACGATTAGAGAGATCTTCTTATTTATTAATCTCTTGGACACTTAAACGGTTTT[T/C]GCACGATTTGGTTCTAGTTTCAACCCAGGACGAATGTTTTATAAATTTACAACCAACCCGATGAAATTAGTTGTTCTTCTTCTTCTGAGTAATCAACTAATC    | T/C |
| 5 | PERL_1078160_Ler | TGCAATTCGACAACATAACCCGACAATGCTACAAGTCTTATCCTCCTACTCATCGAATATCAAATCCGACCCGATCAAACATGCACCACCGCGCTTA[A/C]CCTCAACGTGAAATCCGCAAAGGAAGCAACGTCCGTTGTCTTAAGCTTCTCAAATGTCTCAGAAATCAACCGCCGGACGAAAGGTAATGTTACCA          | A/C |
| 5 | CER426941        | GACTACACGCTTACAATGGCTCTTATAGGCGCGTCAGGCTCCGACGACGGAACGGTTCAAATGTGGGATCCACGTAACGGAGGGACGTTAGAAGAAA[C/T]GGTTAGGCCCGGTGGTGGAGCGCGGATTTGTTCCGTTAGAGTTCGATCCGTTCCGTTGGATCTTCCATAGCCGTTGGATGTGCTGACCGGAATGCCTACGTG   | C/T |
| 5 | PERL_1084153_Ler | AATAGTAGTATAACAACAAAGTATCGCATGATTATTCTCCTAATCTTCGATTTCTGTTTTCTACACAAAAGTCCGCCAACATAAATCATGCAACGACAAAG[C/A]GGGATCGAGGGATAGAGAGAGCACACAACACAAGAGCTGCCTTTGACTTTTTCAAACCCTAAACCAAATGACCGTAACGTCCATCAACAACACGTCCC   | C/A |
| 5 | PERL_1086348_Ler | TCTCACACTATATCTCAAATCACAGAAAACAAAATCTTTTTTAAATATACAATTTAAATCTTTTACTCCGATTTAAATATAACATTTTTGGGACAACATA[G/A]JCCAAACGTTACAAGACGTCAATAAATCCATTGACGGTTACAATTTGATGATAGGTTGCTTTCGTTACCCTGAGTCCCTGAGTATTAGTGTGGATATCC   | G/A |
| 5 | PERL_1088463_Ler | TCGTGATTTTGAATCCTTATGAAGATGAATGCACCTCTTTGGATAAGAAGTGCCTATGGCGTTGTTGATGATAAGTGAACCTGTAACCATCGGTTT[C/A]CATGGCTGGATAGCTACTTTGAGTCAGGACGACGACTACTCGCTCCTCAAGACGATCAAAACCCGGTTGCATCGGATCAACCCGAAACGCATCTCCC         | C/A |
| 5 | PERL_1091480_Ler | CACGACAAAATAAATCAATAAGTAAATTTCTTTTAAATCAAATCACGCCTTTCGCTCTCCTTGCATCTCGCTGAATCATCTCAGACCGTCCCATGAGGC[A/T]AAGCGATGGATTCCGTCATGGTTGTCACGCATATGCAGTTTTATTTAGTTTTATTTTTGGTAAAAAGTAAATTTATATCATTTTTGAAATTTA          | A/T |
| 5 | CER441642        | TTGGACTTTTCTTGCATATTGCTTGCCTTCGTGAACCAGTCTTTGGTTTTCCGGTCAACCCAGCTTTGGGTATCTTCAGTTGCGGCACAGATCGTGAC[C/T]CTCCGCTAGGAAACTCATGGCAAAGACGCTACCACAAAGAAATTTGGTTTTCCGGGACGAAATGGTCTGGTCTTTAACCTGGTCCGTTCAATA           | C/T |
| 5 | PERL_1096052_Ler | TCATTACCCTAAAGAAATATGAATTTCCATAAATCAGTTCTTTCACTCTGTTAGCAAAGACAGTATAAGGGTCTTTTCTCGAGCACGGACTGTTCTT[C/A]GCCATTTGCATCACTATTCCAACCTCTTCTTGTGGCATCACGTTTGTAGTGAAGAGTTGATATAAAGCTGGAAGAAGCTATAATAAGGTTTCAAGT         | A/T |
| 5 | PERL_1098054_Ler | ATGGAGCTTGAAATTTGAAATTCGATGAGGAAAACAAATCGGAAAACAGTAACTTACTTTGAGATCGTATTACGATCATTCCGCCGGCATTTCGAAACG[G/A]CGATGAGAGCTTCCACCTCCGGCCAAAACGGCGGCTGAGCAAACGATGAAACGAGAATCAATTCACAGAACAGATCTAATCTAAGCAGAGAGAGAGA      | G/A |
| 5 | CER436560        | CAAAGGATAGACTAATGGGCTTAAAGTATTTGGGCTTTATTATAGGCCATTAAGCACCCGGAACGCTGACATTTGAGTAGCTAGCTCCGGG[A/C]GCAAAATTCAGTCTGTGAAACTTTCCGAGAAAGGGATGTCGAGAGGATCTCGATTTCGTTAGGGCTCCTGGGCTTACTCTGTGCGGTTAATCTTCAA              | A/C |
| 5 | PERL_1101746_Ler | GAAGAGTTTAAAGATTTATAAAGAAGAAGACCGTACAGATGGACAGATTTAGCTGAAGGCGTACGACAATATCACCTGCCAATGTTGTGAGTTTGGCA[C/G]TACGAGAGAGATTAAGGATTACAGGATTAAGGAAACCTATACATATGTTTTTCTTTTTTCTTTTTCATTATAAAAGGTATACATGATAAATATGTTATCTT   | C/G |

|   |                   |                                                                                                                                                                                                                    |     |
|---|-------------------|--------------------------------------------------------------------------------------------------------------------------------------------------------------------------------------------------------------------|-----|
| 5 | PERL_1105321_Ler  | ATTAGTACCTTATCAATATAATGAGAGTTTTCTCGGAACCTCCTCAACGGACCATCCTCTAGGCAATCGGAAACCTTTGGAGGCATATTCAACTCCGC[A/G]GTG<br>ATCCTGCAAAAGCATAAACACACTGATTTTAAGTATTTGATCCAAGAAGAACCATATGCTTCTGTAATTTCAAATCAGAACAAGGACCTGTTTGGT     | A/G |
| 5 | PERL_1107666_Ler  | TTATTCACCTTTCTTTCCAACATCTACTCTCTAGTACTAGTAAAGTAGTAACACTGAAGAATTTAAAGTTAGGGGCAGAAGACTTATGCAAAACACCTAAC[G/C]GCAC<br>TCAGTCTCACGATTGCTCCCAACAAGCCTTCATGGACTACTGGTTCTTCTTTCATCAAACAACCTTCATAGAAGACTATACCGGACTCAGACCACG | G/C |
| 5 | PERL_1109312_Ler  | TAAAGAATTTGTTGGCCCAAAAGTTAAAGAATCACCATCTAGGCTTTTAGCCTACAAATTTGGACAGATCATAGCACAGAGAATGATTTCTCTAACATG[G/A]ATC<br>GGCCAGGCCTTAATACTAAGCCAATGTGACAATAAGACAAGTCATAAAATGTTATTTCAGATACATGAATATGTTTGTCTTCGTTGGATCAAAAACC   | G/A |
| 5 | PERL_1110914_Ler  | GAAACACTTAATGGATGCTTATAATAAGAAGTAAGACTTTCCGCCGCTGTGGAAAATATAAACCATAGAATTGGGACTGCTTTTGTAGAATGTGGACCG[A/T]TCCG<br>GACTTTGTCAAATTTTCGTTTAAACCGTTGGTCTCCTTTTCGTTACTCATTTCCGCACGCCATTAACGATAAAGATTCCCATTTATTTTCGTCGTC   | A/T |
| 5 | PERL_1112536_Ler  | GCTAACCAAAATGAAACAAGTACAATGGAACCAGCAGCTTCCAGAGGCAACGATCATGGGTACCTCCACAACCACCTCCAGTTGCCATGGCAGAAGCAG[T/C]C<br>GAGGCCATTCGCCGCTCTAAGCCACAAGCTAAGATAGACCAAGAAGCAGCTGCTAGTGATGGCCAGTCAGGTGTGAGCGATGAGTTACAGAAGATCACT   | T/C |
| 5 | PERL_1114716_Ler  | ACAAAACAAAAATCAGAAAGACAAATCGATAAATTAGTAAAGAGCTAGAGAAAGATAAACTTGTAAAGAAATAGGGTTAAGGCTTACTAGTAGCTTGCGCC[A/T]GAA<br>ACAACAAGATTGAATCGAAGGTGGAGATAGCTAATTATCGTCTAGGGTTTGCCATTTTCACTCTCCAACGGGGGAATTGGGGATATCGTCAAGCTA  | A/T |
| 5 | PERL_1116668_Ler  | TTTTATTGATGGAGGCACAAGAACCTGCATTGGTATCATCAGCTTCTGTCTTTTCTCGGTTGATGATGCAACGGTGGCAGCGGGCGATCAATGGAGTCC[A/G]T<br>GCAATCAGAGACCGCACTGACTCCAGATTGAGAATGATCAGTGGTAGTAGTAGTAGTTGCAGTTGTTGTGGTTTGTAAAGAAGTAGAGACAAGGCC      | A/G |
| 5 | PERL_1118867_Ler  | GAACGAAAAAAGGAACAACAACTAGAGAGCGACCTTCTCTTACCAGGCGGTTACTCTCACGCGCTAACGTACATATAGACGAGTCCGAGCGATCTCGC[A/G]G<br>CGGCGTTTATCGATACCCTAAGCTCGTGGTTGTTTCAGATTTTTGTTAATTGAATTCTCTGCATCGAGATAGAGGGAGATGTGGGTTTTCTATCTGATC    | A/G |
| 5 | PERL_1120950_Ler  | GAAGACGGTCTTGATTACACATCTATACGTGCTCTAACTCTTCTACGCCGATGCAATTGCAGACTGCATTGACTTCATCAACCGCTCCTCCGCTTGAC[A/C]GC<br>TTCTCATTCTTCCAATAATTTCTTCCATTTTGTAAAATCCAATGTTTCTGTATATGCAACCAATTCGAATTCCTTGTATTATTTATTTTTT           | A/C |
| 5 | PERL_1123914_Ler  | ATGCAGTGATTCCCTGGGCTAATGGCTGCTGGGGAGGCAGCTTGTGCATCTGTTTCATGGTGCCAACAGGCTTGGTGCAAATTCCTGCTCGACATTGTCGT[A/G]T<br>TTGGTCGTGCTTGTGCAAATAGGGTTGCAGAGATAAGCAAACCAGTTAGTCTTTTTTGGAGACTGCTGTTATTATAAAAGATAAGTCTCTTCTGATCA  | A/G |
| 5 | CER435876         | AAAACCTTAACCCTAAGAATACGAAGCAGAACCAAACTTAGCTCTATGAAATCCGAGAATCGGAACTTTACCTGCAAATCCTCGGAGGCCAGCAGAAG[A/G]CG<br>AATATCCCGACATCACATGTATATAATCTCAGAAATTATACAAAAATTCTCAACTCTTTCGCTTCTCCGGAGCAAAACACCAAATCCGAAACACTT      | A/G |
| 5 | *PERL_1126141_Ler | TGTCACAACCTAGAACTAAAATTAAGGATCCATTTTAAATGTTAAAAAGAAAAAATTGGACGATGAGAGTATTAACATGCCTTACCGCATTATCAGCGC[C/T]ATCTT<br>GGTTCGATTCCGATCCGAATTCGGGTTGACTTTGCCCGTTCTGATCCAGCTTCTTCTTCTGTGTTTCGTTCTTCTTCTCGTCAAGTCAAG        | C/T |

**Supplemental Table 1 : List of SNPs used for genotyping**

\* Genotyping performed with Taqman technology

(1) SNPs genotyped only in female population
