# Supplementary material for: Genome-Wide Crossover Distribution in Arabidopsis thaliana Meiosis Reveals Sex-Specific Patterns along Chromosomes
Source: PubMed Central journal article supplement (PMC3207851; doi:10.1371/journal.pgen.1002354), 2011-11-03
Supplement: pgen.1002354.s004.pdf [file pgen.1002354.s004.pdf]

|                | <b>Coding GC</b> |       |         | <b>GC1</b> |       |         | <b>GC2</b> |       |         | <b>GC3</b> |       |         |
|----------------|------------------|-------|---------|------------|-------|---------|------------|-------|---------|------------|-------|---------|
|                | (a)              | R2    | p-value | (a)        | R2    | p-value | (a)        | R2    | p-value | (a)        | R2    | p-value |
| <b>Mâle</b>    |                  |       |         |            |       |         |            |       |         |            |       |         |
| Chr1 Male      | (+)              | 0.006 | 0.487   | (-)        | 0.017 | 0.215   | (-)        | 0.001 | 0.753   | (+)        | 0.052 | 0.03    |
| Chr2 Male      | (+)              | 0.076 | 0.0362  | (+)        | 0.003 | 0.698   | (+)        | 0.004 | 0.624   | (+)        | 0.092 | 0.021   |
| Chr3 Male      | (+)              | 0.004 | 0.615   | (-)        | 0.056 | 0.0648  | (+)        | 0.001 | 0.776   | (+)        | 0.011 | 0.412   |
| Chr4 Male      | (+)              | 0.137 | 0.0171  | (+)        | 0.019 | 0.387   | (+)        | 0.083 | 0.067   | (+)        | 0.097 | 0.047   |
| Chr5 Male      | (+)              | 0.03  | 0.65    | (+)        | 0.017 | 0.235   | (+)(-)     | 0     | 0.964   | (+)(-)     | 0     | 0.856   |
| <b>Femelle</b> |                  |       |         |            |       |         |            |       |         |            |       |         |
| Chr1 Female    | (-)              | 0.014 | 0.266   | (-)        | 0.02  | 0.682   | (-)        | 0.006 | 0.486   | (-)        | 0.006 | 0.467   |
| Chr2 Female    | (-)              | 0.026 | 0.226   | (-)        | 0.015 | 0.354   | (-)        | 0.006 | 0.562   | (-)        | 0.059 | 0.066   |
| Chr3 Female    | (-)              | 0.077 | 0.026   | (-)        | 0.051 | 0.0696  | (-)        | 0.005 | 0.584   | (-)        | 0.119 | 0.005   |
| Chr4 Female    | (-)              | 0.04  | 0.212   | (-)        | 0.085 | 0.0644  | (-)        | 0.004 | 0.699   | (-)        | 0.013 | 0.479   |
| Chr5 Female    | (-)              | 0.018 | 0.223   | (-)        | 0.032 | 0.105   | (+)(-)     | 0     | 0.869   | (-)        | 0.003 | 0.651   |

**Supplemental Table 3: Correlation between CO rates and Chromosome features**

(a) positive (+) or negative (-) correlation
