# Supplementary material for: Genome-Wide Crossover Distribution in Arabidopsis thaliana Meiosis Reveals Sex-Specific Patterns along Chromosomes
Source: PubMed Central journal article supplement (PMC3207851; doi:10.1371/journal.pgen.1002354), 2011-11-03
Supplement: pgen.1002354.s005.pdf [file pgen.1002354.s005.pdf]

| <b>Number of COs</b> | <b>0</b> | <b>1</b> | <b>2</b> | <b>3</b> | <b>4</b> | <b>5</b> |
|----------------------|----------|----------|----------|----------|----------|----------|
| <b>Chromosome 1</b>  |          |          |          |          |          |          |
| Male                 | 222      | 622      | 487      | 138      | 26       | 4        |
| Female               | 540      | 731      | 218      | 15       | 2        | 1        |
| <b>Chromosome 2</b>  |          |          |          |          |          |          |
| Male                 | 441      | 710      | 267      | 40       | 2        | 1        |
| Female               | 685      | 757      | 59       | 6        | 1        | 0        |
| <b>Chromosome 3</b>  |          |          |          |          |          |          |
| Male                 | 426      | 687      | 379      | 62       | 7        | 2        |
| Female               | 664      | 724      | 114      | 3        | 2        | 0        |
| <b>Chromosome 4</b>  |          |          |          |          |          |          |
| Male                 | 533      | 781      | 260      | 19       | 0        | 0        |
| Female               | 737      | 706      | 58       | 1        | 0        | 0        |
| <b>Chromosome 5</b>  |          |          |          |          |          |          |
| Male                 | 250      | 621      | 428      | 92       | 15       | 0        |
| Female               | 603      | 736      | 162      | 7        | 1        | 0        |

**Supplemental Table 4**

**Observed Number of chromosomes having 0, 1, 2 or more COs**
