# Supplementary material for: Genome-Wide Crossover Distribution in Arabidopsis thaliana Meiosis Reveals Sex-Specific Patterns along Chromosomes
Source: PubMed Central journal article supplement (PMC3207851; doi:10.1371/journal.pgen.1002354), 2011-11-03
Supplement: pgen.1002354.s006.pdf [file pgen.1002354.s006.pdf]

**Supplemental Table 5 : effect of the truncations on the distribution of chromosomes with 1 or 2 or more COs**

|                           | <b>chro 1</b> | <b>chro 2</b> | <b>chro 3</b> | <b>chro 4</b> | <b>chro 5</b> |
|---------------------------|---------------|---------------|---------------|---------------|---------------|
| <b>Male -30%</b>          |               |               |               |               |               |
| <b>overall loss(a)</b>    | 42.5 %        | 42.8          | 34.1          | 39.3          | 44.6          |
| <b>1 CO loss (b)</b>      | 39.7          | 36.9          | 29.5          | 32.0          | 40.6          |
| <b>2 COs or more loss</b> | 43.6          | 49.2          | 37.3          | 49.1          | 46.6          |
| <b>Male -50%</b>          |               |               |               |               |               |
| <b>overall (a)</b>        | 62.2          | 54.0          | 51.2          | 46.5          | 61.2          |
| <b>1 CO loss (b)</b>      | 58.4          | 47.0          | 44.3          | 38.4          | 59.4          |
| <b>2 COs or more (c )</b> | 63.8          | 61.3          | 56.1          | 57.3          | 62.1          |
| <b>Female -30%</b>        |               |               |               |               |               |
| <b>overall (a)</b>        | 27.1          | 38.7          | 20.3          | 31.9          | 24.6          |
| <b>1 CO loss (b)</b>      | 20.5          | 35.8          | 15.3          | 27.6          | 16.7          |
| <b>2 COs or more (c )</b> | 36.8          | 54.3          | 35.1          | 57.1          | 41.3          |
| <b>Female -50%</b>        |               |               |               |               |               |
| <b>overall (a)</b>        | 50.1          | 45.8          | 43.4          | 37.1          | 46.9          |
| <b>1 CO loss (b)</b>      | 41.6          | 42.9          | 36.2          | 31.7          | 36.8          |
| <b>2 COs or more (c )</b> | 62.8          | 61.4          | 64.9          | 68.9          | 68.2          |

(a) based on the genetic map length

(b) observed loss of chromosomes with one CO

(c ) observed loss of chromosomes with 2 or more COs
